# Supplementary material for: Marine natural products
Source: Royal Society of Chemistry journal article supplement (doi:10.1039/d3np00061c), 2024-01-01
Supplement: d3np00061c1.pdf [file d3np00061c1.pdf]

[Marine natural products \(2022\) D3NP00061C](#)

**Supplementary Information**

**Anthony R. Carroll, Brent R. Copp, Tanja Grkovic, Robert A. Keyzers and Michèle R. Prinsep**

|           |                                                            |            |
|-----------|------------------------------------------------------------|------------|
| <b>1</b>  | <b>Introduction</b>                                        | <b>2</b>   |
|           | <b>1.1 Abbreviations</b>                                   | <b>3</b>   |
|           | <b>1.2 Bioactivity categories</b>                          | <b>4</b>   |
| <b>2</b>  | <b>Marine microorganisms and phytoplankton</b>             |            |
|           | <b>2.1 Marine-sourced bacteria</b>                         | <b>5</b>   |
|           | <b>2.2 Cyanobacteria</b>                                   | <b>24</b>  |
|           | <b>2.3 Marine-sourced fungi (excluding from mangroves)</b> | <b>27</b>  |
|           | <b>2.4 Fungi from mangroves</b>                            | <b>66</b>  |
|           | <b>2.5 Dinoflagellates</b>                                 | <b>70</b>  |
| <b>3</b>  | <b>Green algae</b>                                         | <b>71</b>  |
| <b>4</b>  | <b>Brown algae</b>                                         | <b>72</b>  |
| <b>5</b>  | <b>Red algae</b>                                           | <b>73</b>  |
| <b>6</b>  | <b>Sponges</b>                                             | <b>75</b>  |
| <b>7</b>  | <b>Cnidarians</b>                                          | <b>95</b>  |
| <b>8</b>  | <b>Bryozoans</b>                                           | <b>111</b> |
| <b>9</b>  | <b>Molluscs</b>                                            | <b>112</b> |
| <b>10</b> | <b>Tunicates (ascidians)</b>                               | <b>114</b> |
| <b>11</b> | <b>Echinoderms</b>                                         | <b>116</b> |
| <b>12</b> | <b>Miscellaneous</b>                                       | <b>121</b> |
| <b>13</b> | <b>Conclusions</b>                                         | <b>122</b> |

## 1 Introduction

In the main Review document, only the structures of a selection of highlighted compounds are shown. However, *all* structures are available for viewing, along with names, taxonomic origins, locations, biological activities and other information in this Supplementary Information (SI) document. Each page of the SI document contains at least one array of numbered structures. The numbers are those assigned in the Review document. For structures that have their absolute configurations fully described, the compound number in the diagrams is preceded with the † symbol. Below each structural array, the relevant information for each reference and associated compounds is listed. The first line contains the **Main article reference** #, followed by **Taxonomy**, **Location** and **Article title**. Each section is separated by the // symbol. The following indented line(s) provide information

about each compound referred to in the Review for that publication. This information is provided in the following order, again separated by the // symbol (\* is inserted where there are no data): **Compound number**, **Status** (N for a new compound; M for new to marine; R for a revision (structure, stereochemistry, stereochemical assignment etc); A for artefact), **Compound name**, **Biological activity** and **Other information**. To assist viewing, these headings are noted in the footer at the bottom of each page. To conserve space, the **Title** and **Location** data may have been abbreviated, and are not as complete as in the source, [MarinLit](#). Most **Main article reference** numbers are hyperlinked to the relevant DOI or URL.

## 1.1 Abbreviations

In the **Biological activity and other information** section, the following abbreviations have been used:

|                        |                                                            |                      |                                                    |
|------------------------|------------------------------------------------------------|----------------------|----------------------------------------------------|
| abs. config.           | absolute configuration                                     | mixt.                | Mixture                                            |
| AChE                   | acetylcholine esterase                                     | MTCL                 | murine tumour cell line                            |
| activ.                 | activity                                                   | NF- $\kappa$ B       | Nuclear factor kappa B                             |
| ABH2                   | alpha-ketoglutarate dependent dioxygenase alkB homologue 2 | NO                   | nitrous oxide                                      |
| ALR2                   | aldose reductase 2                                         | norm.                | normal                                             |
| anti-inflam.           | antiinflammatory                                           | nHCL                 | normal human cell line                             |
| antioxid.              | antioxidant                                                | nMCL                 | normal mammalian cell line                         |
| bact.                  | bacteria                                                   | Nrf2                 | nuclear factor-erythroid factor 2-related factor 2 |
| Cbl-b                  | casitas B-lineage lymphoma proto-oncogene-b                | NT                   | not tested                                         |
| <i>C. elegans</i>      | <i>Caenorhabditis elegans</i>                              | PGE <sub>2</sub>     | prostaglandin E2                                   |
| CL                     | cell line                                                  | <i>P. falciparum</i> | <i>Plasmodium falciparum</i>                       |
| COX-2                  | cyclooxygenase-2                                           | PPAR- $\gamma$       | Peroxisome Proliferator-Activated Receptor-gamma   |
| cytotox.               | cytotoxicity/cytotoxic                                     | PL                   | pancreatic lipase                                  |
| degrad.                | degradation                                                | prod.                | production                                         |
| DPPH                   | 2,2-diphenyl-1-picrylhydrazyl                              | PKS                  | polyketide synthase                                |
| DPP4                   | dipeptidyl peptidase-4                                     | pot.                 | potent                                             |
| EGFR                   | epidermal growth factor receptor                           | prod.                | production                                         |
| enant.                 | Enantiomer                                                 | purif.               | purify/purified                                    |
| HIF                    | Hypoxia Inducible Factor                                   | PR1                  | pathogenesis-related protein 1                     |
| HTCL                   | human tumour cell line                                     | PTP1B                | protein-tyrosine phosphatase 1B                    |
| hum.                   | human                                                      | PTP                  | protein-tyrosine phosphatase                       |
| IL6                    | interleukin 6                                              | rac.                 | racemic mixture                                    |
| IA                     | inactive                                                   | ref.                 | reference                                          |
| inhib.                 | inhibitor/inhibition/inhibitory                            | <i>S. aureus</i>     | <i>Staphlococcus aureus</i>                        |
| insep.                 | inseparable                                                | SPN                  | single-nucleotide polymorphism                     |
| immunomod.             | immunomodulatory                                           | stereochem.          | stereochemistry                                    |
| isol.                  | Isolated                                                   | struct.              | structure                                          |
| IL-1 $\beta$           | interleukin 1 beta                                         | synth.               | synthesis/synthetic                                |
| LDH                    | lactate dehydrogenase                                      | TCL                  | tumour cell line                                   |
| MIC                    | minimum inhibitory concentration                           | TDP1                 | tyrosyl-DNA phosphodiesterase 1                    |
| MDR                    | multidrug resistant                                        | TGF- $\beta$ 1       | transforming growth factor beta-1                  |
| <i>M. tuberculosis</i> | <i>Mycobacterium tuberculosis</i>                          | TGF                  | tissue growth factor                               |
| Mptp                   | <i>M. tuberculosis</i> protein tyrosine phosphatase        | TNF- $\alpha$        | tumour necrosis factor alpha                       |
| mod.                   | moderate                                                   | TRPM                 | transient receptor potential melastatin            |
| microb.                | microbial, microbe                                         | XRD                  | X-ray diffraction analysis                         |

## 1.2 Biological activity definitions

Cytotoxic, antiparasitic, antioxidant, antiinflammatory, enzyme and antiviral activity ( $IC_{50} < 10 \mu M$ ); any activity reported at a higher dose is deemed inactive (IA)

Potent (pot.) activity:  $IC_{50} < 100 \text{ nM}$

Moderate (mod.) activity:  $IC_{50} < 1 \mu M$

Weak activity:  $IC_{50} < 10 \mu M$

Antibacterial and antifungal activity ( $MIC < 32 \mu g/mL$ ,  $< 64 \mu M$  based on MW 500 Da); any activity reported at a higher dose is deemed inactive (IA)

Potent (pot.) activity:  $MIC < 1 \mu g/mL$

Moderate (mod.) activity:  $MIC < 8 \mu g/mL$

Weak activity:  $MIC < 32 \mu g/mL$

2 Marine microorganisms and phytoplankton: 2.1 Marine-sourced bacteria

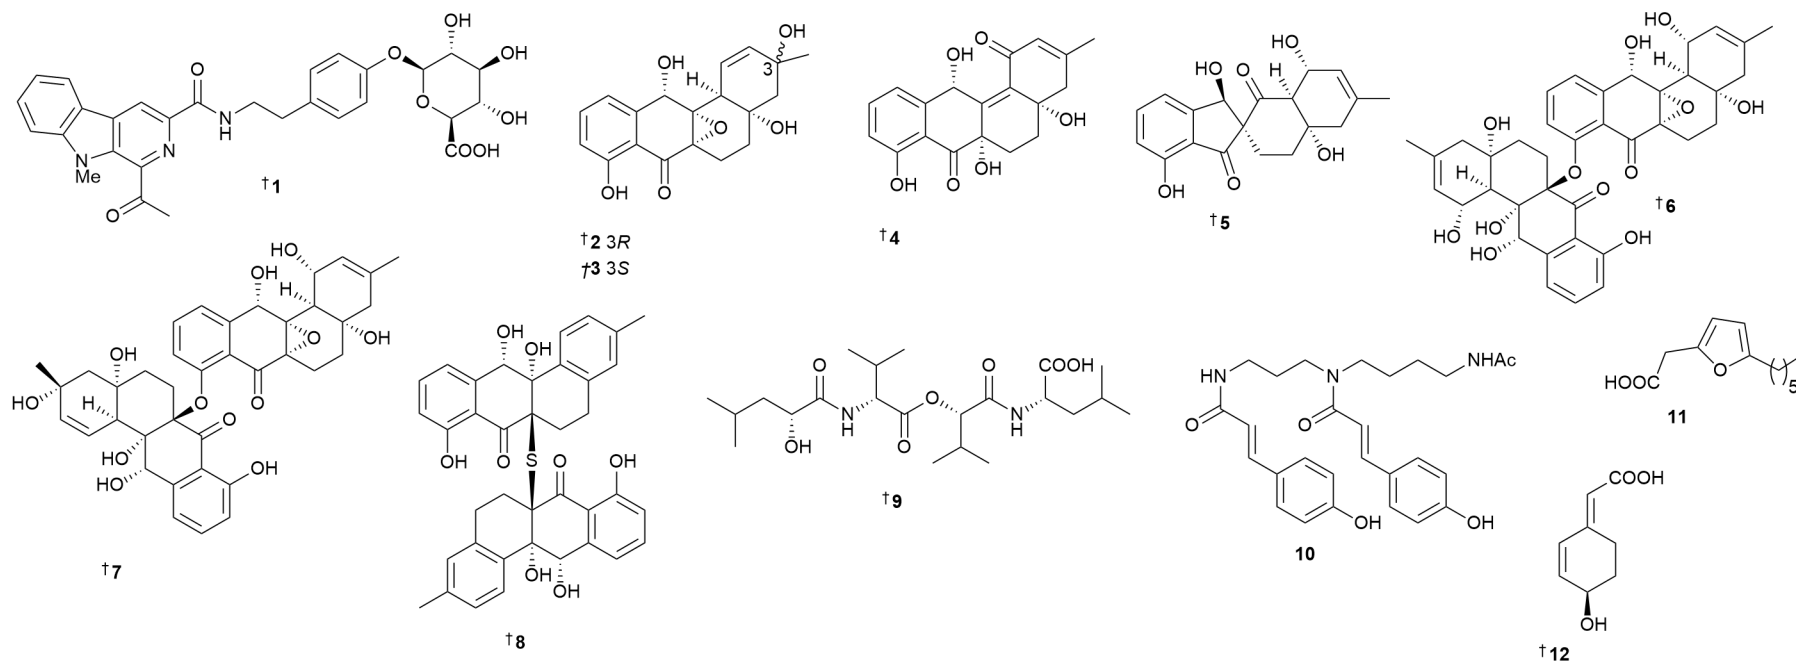

- 4 Actinobacteria *Actinoalloteichus cyanogriseus* // (sponge, *Phakellia fusca*) Xisha Islands, China // Marinacarboline glucuronide, a new member of  $\beta$ -carboline alkaloids from sponge-derived actinomycete *Actinoalloteichus cyanogriseus* LHW52806  
 1 // N // marinacarboline glucuronide // IA vs 8 bact. strains; IA vs murine CL; IA vs anti-inflam.; XRD.
- 5 Actinobacteria *Actinomadura* sp. // (sea water) Okinawa, Japan // Kumemicinones A–G, cytotoxic angucyclinones from a deep sea-derived actinomycete of the genus *Actinomadura*  
 2 // N // kumemicinone A // weak activ. vs MTCL; XRD.  
 3 // N // kumemicinone B // weak activ. vs MTCL.  
 4 // N // kumemicinone C // IA vs MTCL.  
 5 // N // kumemicinone D // IA vs MTCL.  
 6 // N // kumemicinone E // weak activ. vs MTCL; XRD.  
 7 // N // kumemicinone F // IA vs MTCL.  
 8 // N // kumemicinone G // weak activ. vs MTCL.
- 6 Actinobacteria *Agrococcus* sp. // (sediment) South China Sea // Metabolites from the deep-sea sediment-derived bacterium *Agrococcus* sp. SCSIO 52902 and their biosynthesis  
 9 // N // agrotetrate A // IA vs 3 HTCLs; IA vs 4 bact. strains.  
 10 // N // N1,N5-di-*p*-coumaroyl-N10-acetylspermidine // IA vs 3 HTCLs; IA vs 4 bact. strains.  
 11 // M // 2-(5-hexylfuran-2-yl)acetic acid // IA vs 3 HTCLs; IA vs 4 bact. strains.  
 12 // N // agrocusin A // IA vs 3 HTCLs; IA vs 4 bact. strains; XRD.

Key: Main article bibliography reference // Taxonomy // Location // Article title

Compound number // Status // Compound name // Biological activity and Other information

## 2 Marine microorganisms and phytoplankton:

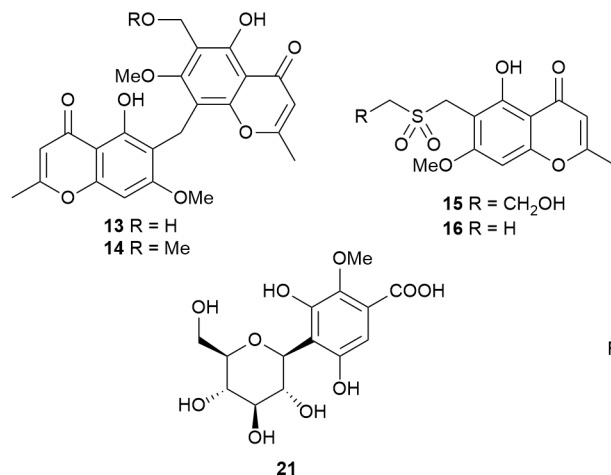

## 2.1 Marine-sourced bacteria

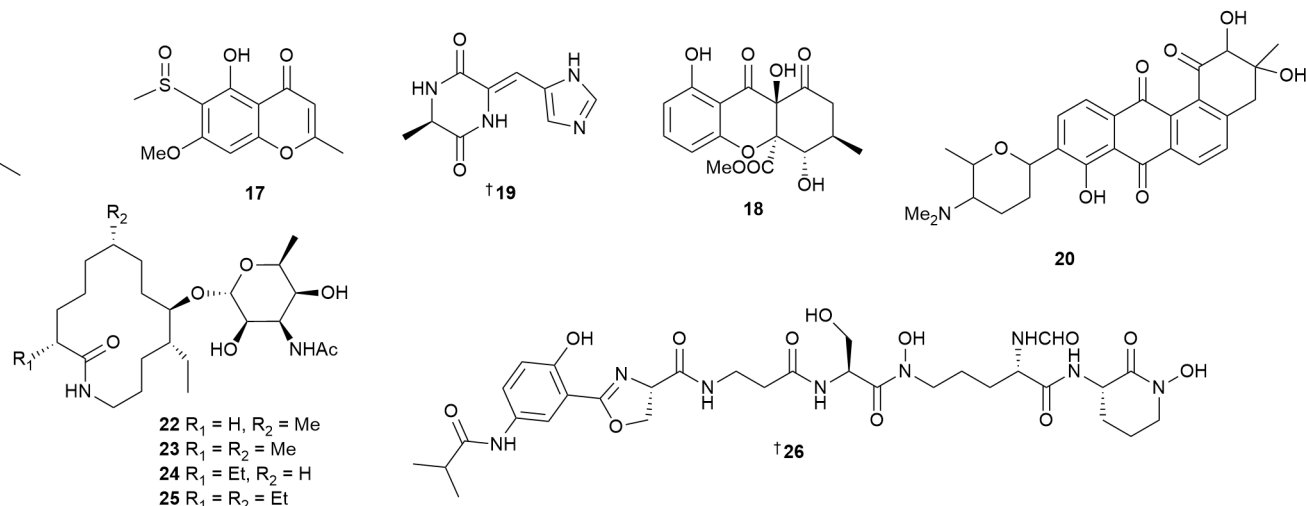

- 7** Actinobacteria *Amycolatopsis* sp. // (sediment) SW Indian Ocean // Amycolachromones A–F, from a streptomycin-resistant strain of the deep-sea actinomycete *Amycolatopsis* sp. WP1  
**13** // N // amicolachromone A // IA vs ABH2 enzyme.  
**14** // N // amicolachromone B // IA vs ABH2 enzyme.  
**15** // N // amicolachromone C // IA vs ABH2 enzyme.  
**16** // N // amicolachromone D // IA vs ABH2 enzyme.  
**17** // N // amicolachromone E // IA vs ABH2 enzyme.  
**18** // N // amicolachromone F // IA vs ABH2 enzyme; XRD.  
**8** Actinobacteria *Georgenia* sp. // (sediment) Pacific Ocean // Anti-tyrosinase compounds from the deep-sea-derived actinomycete *Georgenia* sp. 40DY18  
**19** // N // georgenione A // IA inhib. of tyrosinase.  
**9** Actinobacteria *Gephyromycinifex aptenodytis* // (penguin, *Aptenodytes forsteri*) Antarctic peninsula // Characterization of bioactivities and biosynthesis of angucycline/angucyclinone derivatives derived from *Gephyromycinifex aptenodytis* gen. nov., sp. nov.  
**20** // N // 2-hydroxy-frigocyclinone // weak to pot. activ. vs 3 bact. strains; weak activ. vs 3 HTCL.  
**10** Actinobacteria *Nocardiopsis synnemataformans* // (sediment) Vung Ang, Ha Tinh, Vietnam // Antimicrobial secondary metabolites from the marine-derived actinomycete *Nocardiopsis synnemataformans* HT06  
**21** // N // 4βC-glucopyranosyl-3,5-dihydroxy-2-methoxybenzoic acid // IA to weak activ. vs 3 bact. strains; weak activ. vs 1 fungus.  
**11** Actinobacteria *Nonomuraea* sp. // (sponge) Xisha Island, Hainan, China // Fluvirucins B7–B10, new antifungal macrolactams from a marine-derived *Nonomuraea* sp. MYH522  
**22** // N // fluvirucin B7 // IA vs 2 bact strains; IA vs 3 fungal strains.  
**23** // N // fluvirucin B8 // IA vs 2 bact strains; IA vs 3 fungal strains.  
**24** // N // fluvirucin B9 // IA vs 2 bact strains; IA vs 3 fungal strains.  
**25** // N // fluvirucin B10 // IA vs 2 bact strains; IA vs 3 fungal strains.  
**12** Actinobacteria *Pseudonocardia* sp. // (sponge, *Lissodendoryx stigmata*) Stan Blum State Park boat launch, Florida, USA // Genome mining and metabolomics unveil pseudonochelin: a siderophore containing 5-aminosalicylate from a marine-derived *Pseudonocardia* sp. bacterium  
**26** // N // pseudonochelin // IA to mod. activ. vs 4 bact. strains; IA vs 1 fungal strain.

**Key:** Main article bibliography reference // Taxonomy // Location // Article title

Compound number // Status // Compound name // Biological activity and Other information

2 **Marine microorganisms and phytoplankton:** **2.1 Marine-sourced bacteria**

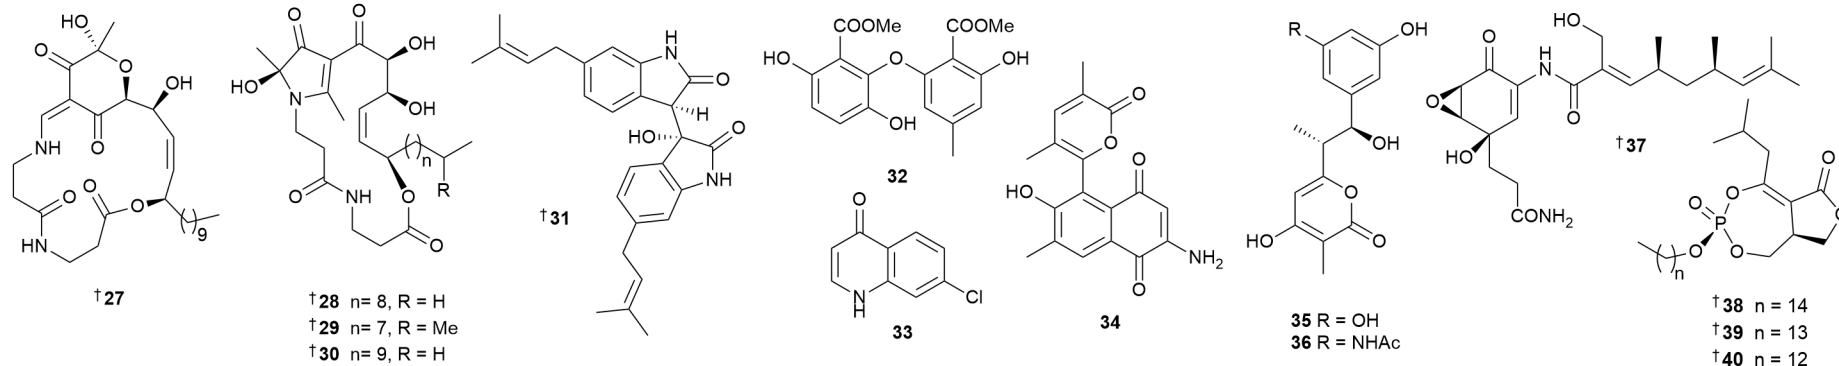

- 13 Actinobacteria *Pseudonocardia kongjuensis* // (coral, *Galaxea fascicularis*) Luhuitou fringing reef, Sanya, China // Antifungal macrolides kongjuemycins from coral-associated rare actinomycete *Pseudonocardia kongjuensis* SCSIO 11457  
27 // N // kongjuemycin A // IA vs 1 bact. strain; IA to weak activ. vs 3 fungal strains.  
28 // N // kongjuemycin B1 // IA vs 1 bact. strain; IA vs 3 fungal strains; XRD.  
29 // N // kongjuemycin B2 // IA vs 1 bact. strain; IA vs 3 fungal strains.  
30 // N // kongjuemycin B3 // IA vs 1 bact. strain; IA vs 3 fungal strains.
- 14 Actinobacteria *Saccharomonospora* sp // (sediment) La Jolla, California, USA // Saccharobisindole, neoasterric methyl ester, and 7-chloro-4(1H)-quinolone: three new compounds isolated from the marine bacterium *Saccharomonospora* sp.  
31 // N // saccharobisindole // IA vs 6 bact. strains.  
32 // N // neoasterric methyl ester // IA vs 6 bact. strains.  
33 // N // 7-chloro-4(1H)-quinolone // IA vs 6 bact. strains.
- 15 Actinobacteria *Salinispora arenicola* // (sediment) British Columbia, Canada // Natural products produced in culture by biosynthetically talented *Salinispora arenicola* strains isolated from Northeastern and South Pacific marine sediments  
34 // N // salinisporamine // IA vs 4 bact strains, IA vs 1 fungal strain; XRD.
- 15 Actinobacteria *Salinispora arenicola* // (sediment) Papua New Guinea // Natural products produced in culture by biosynthetically talented *Salinispora arenicola* strains isolated from Northeastern and South Pacific marine sediments  
35 // M // salinorcinol // IA vs 4 bact. strains, IA vs 1 fungal strain.  
36 // M // salinacetamide // NT.
- 16 Actinobacteria *Salinispora pacifica* // // Structure and candidate biosynthetic gene cluster of a nanumycin-type metabolite from *Salinispora pacifica*  
37 // N // pacificamide // IA vs 2 bact. strains and 1 HTCL.
- 17 Actinobacteria *Salinispora tropica* // // Mass spectrometry-guided discovery of new analogs of bicyclic phosphotriester salinipostin and evaluation of their monoacylglycerol lipase inhibitory activity  
38 // N // salinipostin L // Pot. inhib. vs human monoacylglycerol cyclase.  
39 // N // salinipostin M // Pot. inhib. vs human monoacylglycerol cyclase.  
40 // N // salinipostin N // Pot. inhib. vs human monoacylglycerol cyclase.

Key: Main article bibliography reference // Taxonomy // Location // Article title

Compound number // Status // Compound name // Biological activity and Other information

2 Marine microorganisms and phytoplankton: 2.1 Marine-sourced bacteria

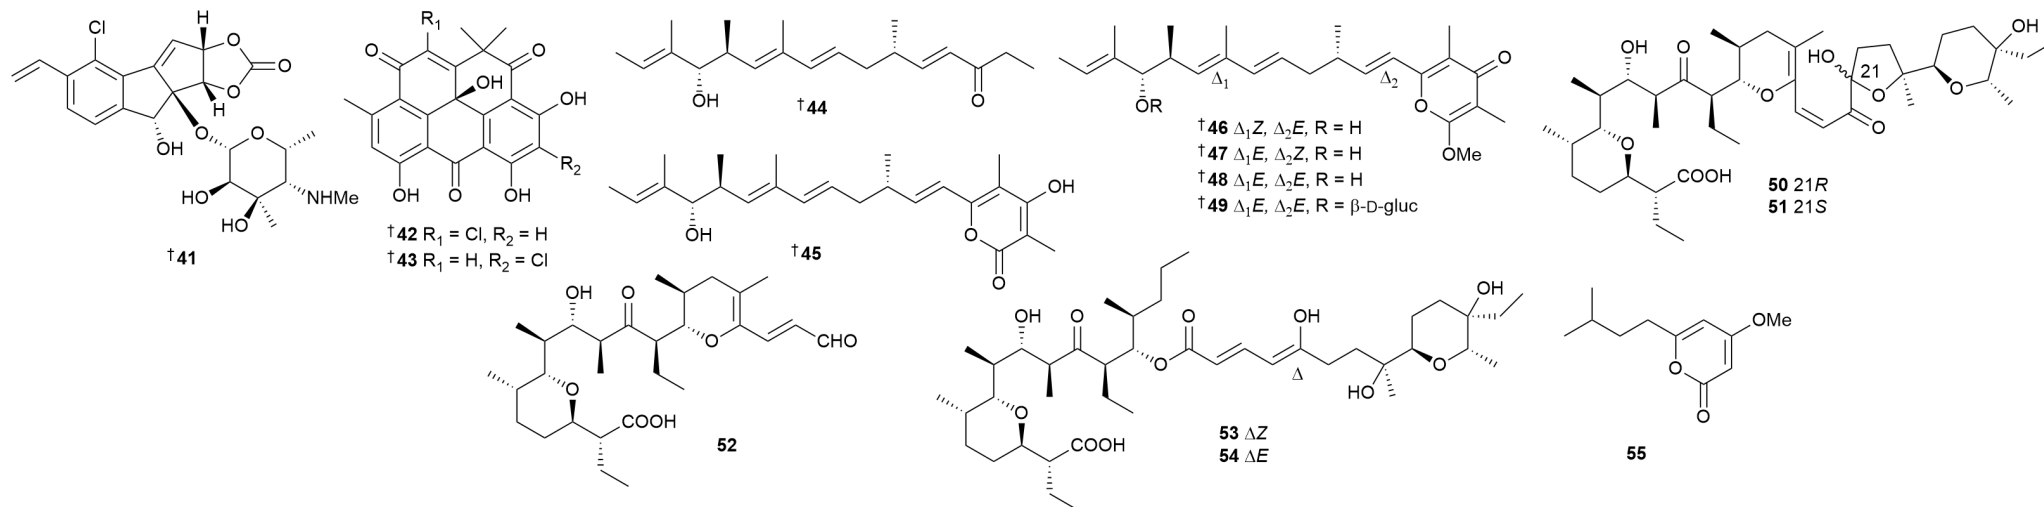

- 18 Actinobacteria *Streptomyces* sp. // (sediment) Hyeopjae Beach, Jeju Island, Republic of Korea // Targeted discovery of an enediyne-derived cycloaromatized compound, jejucarboside A, from a marine actinomycete  
 41 // N // jejucarboside A // IA vs 1 HTCL; IA vs anti-inflam.; IA vs antioxid.
- 19 Actinobacteria *Streptomyces* sp. // (sediment) Mersa Matruth City, Egypt // Chlororesistoflavins A and B, chlorinated benzopyrene antibiotics produced by the marine-derived actinomycete *Streptomyces* sp. strain EG32  
 42 // N // chlororesistoflavin A // weak to pot. activ. vs 2 bact. strains.  
 43 // N // chlororesistoflavin B // IA to mod. activ. vs 2 bact. strains.
- 20 Actinobacteria *Streptomyces* sp // (sediment) Okinawa Trough // Discovery, structure correction, and biosynthesis of actinopyrones, cytotoxic polyketides from the deep-sea hydrothermal-vent-derived *Streptomyces* sp. SCSIO ZS0520  
 44 // N // actinoketone // IA vs 6 HTCLs.  
 45 // N // actinopyrone E // IA vs 6 HTCLs.  
 46 // N // actinopyrone F // NT.  
 47 // M // actinopyrone D // NT.  
 48 // R // PM050463 // IA vs 6 HTCLs.  
 49 // R // PM050511 // Weak to mod. activ. vs 6 HTCLs.
- 21 Actinobacteria *Streptomyces* sp // (sediment) Okinawa Trough // Secondary metabolites and biosynthetic gene clusters analysis of deep-sea hydrothermal vent-derived *Streptomyces* sp. SCSIO ZS0520  
 50 // N // seco-salinomycin A // NT.  
 51 // N // seco-salinomycin B // NT.  
 52 // N // seco-salinomycin C // NT.  
 53 // N // seco-salinomycin D // NT.  
 54 // N // seco-salinomycin E // NT.  
 55 // N // minipyrene // NT.

Key: Main article bibliography reference // Taxonomy // Location // Article title

Compound number // Status // Compound name // Biological activity and Other information



2 Marine microorganisms and phytoplankton: 2.1 Marine-sourced bacteria

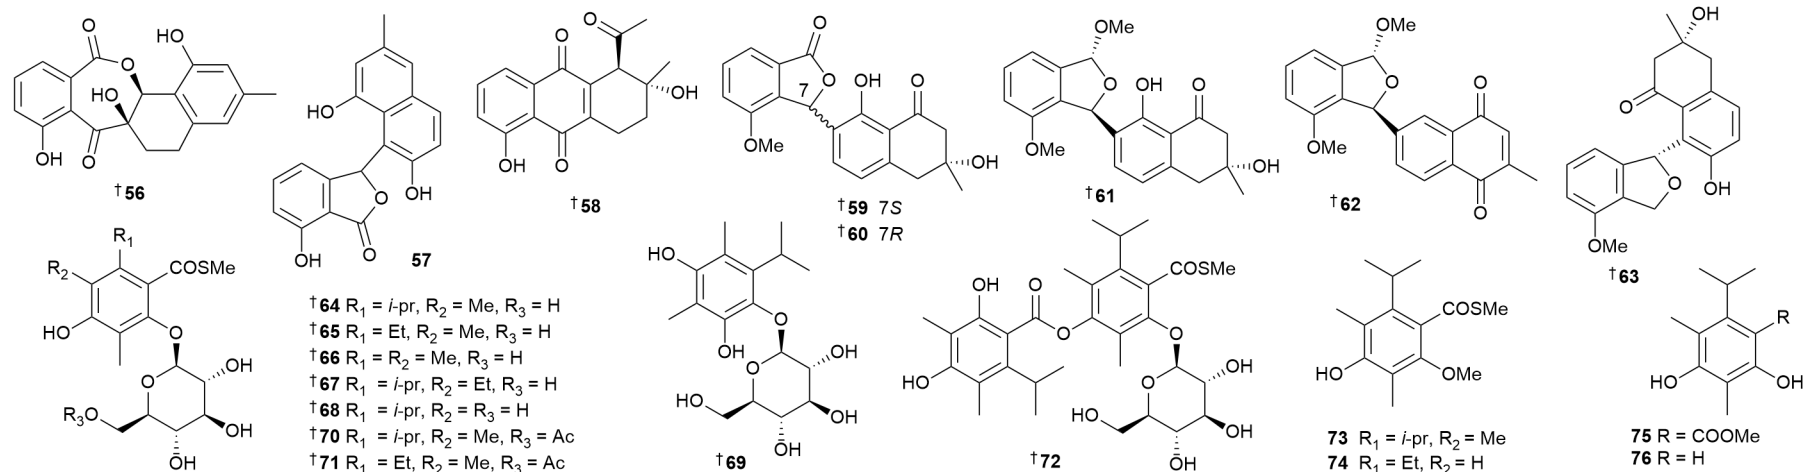

22 Actinobacteria *Streptomyces pratensis* // (sediment) Kiaochow Bay, China // Atypical angucyclinones with ring expansion and cleavage from a marine *Streptomyces* sp.

56 // N // oxemycin A // IA vs 6 bact. strains.

57 // N // 3-(2,8-dihydroxy-6-methylnaphthalen-1-yl)-7-hydroxyisobenzofuran-1(3H)-one // NT.

58 // N // (1*R*,2*R*)-1-acetyl-2,5-dihydroxy-2-methyl-1,2,3,4-tetrahydroanthracene-9,10-dione // IA to mod. activ. vs 6 bact. strains.

59 // N // (*S*)-3-((*R*)-1,6-dihydroxy-6-methyl-8-oxo-5,6,7,8-tetrahydronaphthalen-2-yl)-4-methoxyisobenzofuran-1(3*H*)-one // IA vs 6 bact. strains.

60 // N // (*R*)-3-((*R*)-1,6-dihydroxy-6-methyl-8-oxo-5,6,7,8-tetrahydronaphthalen-2-yl)-4-methoxyisobenzofuran-1(3*H*)-one // IA vs 6 bact. strains; XRD.

61 // N // (*R*)-7-((1*S*,3*R*)-3,7-dimethoxy-1,3-dihydroisobenzofuran-1-yl)-3,8-dihydroxy-3-methyl-3,4-dihydronaphthalen-1(2*H*)-one // IA vs 6 bact. strains.

62 // N // 6-((1*S*,3*R*)-3,7-dimethoxy-1,3-dihydroisobenzofuran-1-yl)-2-methylnaphthalene-1,4-dione // NT.

63 // N // (*R*)-3,7-dihydroxy-8-((*R*)-4-methoxy-1,3-dihydroisobenzofuran-1-yl)-3-methyl-3,4-dihydronaphthalen-1(2*H*)-one // IA vs 6 bact. strains.

23 Actinobacteria *Streptomyces* sp. // (sediment) Zhoushan Island, Zhejiang Province, China // Suncheonosides E–M and benzothioate derivatives from the marine-derived *Streptomyces* sp. ZSN77

64 // N // suncheonoside E // IA vs 3 HTCLs; weak activ. vs NO prod.

65 // N // suncheonoside F // IA vs 3 HTCLs; weak activ. vs NO prod.

66 // N // suncheonoside G // IA vs 3 HTCLs; IA vs NO prod.

67 // N // suncheonoside H // IA vs 3 HTCLs; IA vs NO prod.

68 // N // suncheonoside I // IA vs 3 HTCLs; IA vs NO prod.

69 // N // suncheonoside J // IA to weak activ. vs 3 HTCLs; weak activ. vs NO prod.

70 // N // suncheonoside K // IA vs 3 HTCLs; IA vs NO prod.

71 // N // suncheonoside L // IA vs 3 HTCLs; IA vs NO prod.

72 // N // suncheonoside M // IA vs 3 HTCLs; IA vs NO prod.

73 // N // *S*-methyl 4-hydroxy-6-isopropyl-2-methoxy-3,5-dimethylbenzothioate // IA vs 3 HTCLs; weak activ. vs NO prod.

74 // N // *S*-methyl 6-ethyl-2,4-dihydroxy-3,5-dimethylbenzothioate // IA vs 3 HTCLs; IA vs NO prod.

75 // N // 2,4-dihydroxy-6-isopropyl-3,5-dimethylbenzoate // IA to weak activ. vs 3 HTCLs; IA vs NO prod.

76 // N // 1,3-dihydroxy-5-isopropyl-2,4-dimethylbenzene // IA vs 3 HTCLs; IA vs NO prod.

Key: Main article bibliography reference // Taxonomy // Location // Article title

Compound number // Status // Compound name // Biological activity and Other information

2 Marine microorganisms and phytoplankton: 2.1 Marine-sourced bacteria

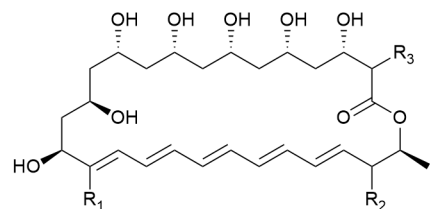

- †77 R<sub>1</sub> = R<sub>2</sub> = R<sub>3</sub> = H  
 †80 R<sub>1</sub> = Me, R<sub>2</sub> = R<sub>3</sub> = H  
 †81 R<sub>1</sub> = Me, R<sub>2</sub> = OH, R<sub>3</sub> = H  
 †82 R<sub>1</sub> = Me, R<sub>2</sub> = OH, R<sub>3</sub> = *n*-pent  
 †83 R<sub>1</sub> = H, R<sub>2</sub> = OH, R<sub>3</sub> = *i*-pent  
 †84 R<sub>1</sub> = Me, R<sub>2</sub> = OH, R<sub>3</sub> = *i*-pent  
 †85 R<sub>1</sub> = Me, R<sub>2</sub> = OH, R<sub>3</sub> = (CH<sub>2</sub>)<sub>3</sub>*i*-pr

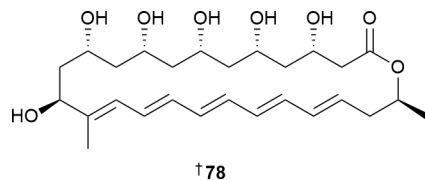

†78

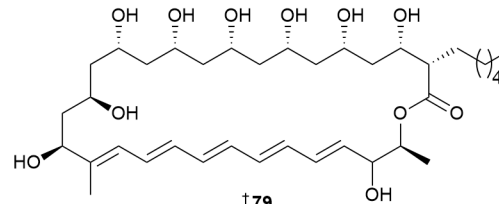

†79

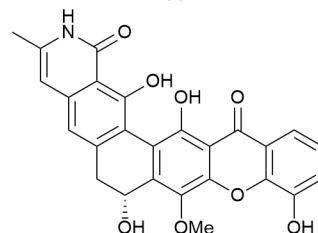

†90

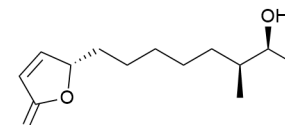

†91

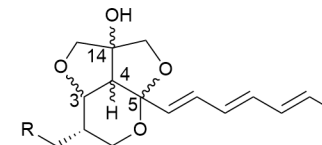

- †86 R = H, 3S, 4R, 5S, 14S  
 †87 R = H, 3R, 4S, 5R, 14R  
 †88 R = Me, 3S, 4R, 5S, 14S  
 †89 R = Me, 3R, 4S, 5R, 14R

- 24 Actinobacteria *Streptomyces antibioticus* // (sediment) Indian Ocean // Genome-guided discovery of antifungal filipins from a deep-sea-derived *Streptomyces antibioticus*  
 77 // N // filipin VI // IA vs 1 fungal strain.  
 78 // N // filipin XIII // IA vs 1 fungal strain.  
 79 // N // filipin XIV // IA vs 1 fungal strain.  
 80 // N // filipin VII // mod. activ. vs 1 fungal strain.  
 81 // N // filipin VIII // IA vs 1 fungal strain.  
 82 // N // filipin IX // mod. activ. vs 1 fungal strain.  
 83 // N // filipin X // mod. activ. vs 1 fungal strain.  
 84 // N // filipin XI // IA vs 1 fungal strain.  
 85 // N // filipin XII // IA vs 1 fungal strain.
- 25 Actinobacteria *Streptomyces specialis* // (sediment) Dokdo, South Korea // Streptoglycerides E–H, unsaturated polyketides from the marine-derived bacterium *Streptomyces specialis* and their anti-inflammatory activity  
 86 // N // streptoglyceride E // IA vs NO prod.  
 87 // N // streptoglyceride F // weak activ. vs NO prod.  
 88 // N // streptoglyceride G // weak activ. vs NO prod.  
 89 // N // streptoglyceride H // weak activ. vs NO prod.
- 26 Actinobacteria *Streptomyces* sp // (sediment) Sattahip, Chonburi, Thailand // Sattahipmycin, a hexacyclic xanthone produced by a marine-derived *Streptomyces*  
 90 // N // sattahipmycin // Pot. activ. vs 5 bact strains; mod. activ. vs *P. falciparum*; IA to weak activ. vs 5 HTCL.
- 27 Actinobacteria *Streptomyces* sp // (sediment) Jeju island, South Korea // Anti-inflammatory butenolides from a marine-derived *Streptomyces* sp. 13G036  
 91 // N // (4S,10S,11S)-4,11-dihydroxy-10-methyl-dodec-2-en-1,4-olide // NT.

Key: Main article bibliography reference // Taxonomy // Location // Article title

Compound number // Status // Compound name // Biological activity and Other information

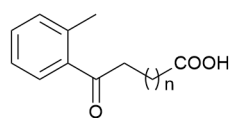

92 n = 8  
93 n = 10

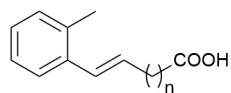

94 n = 8  
95 n = 10

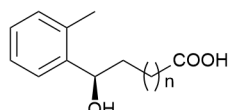

†96 n = 8  
†97 n = 10

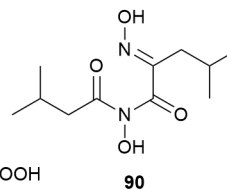

98

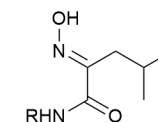

99 R = OH  
100 R = H

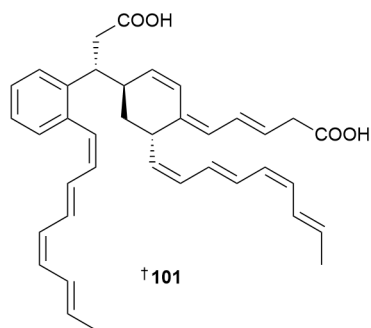

†101

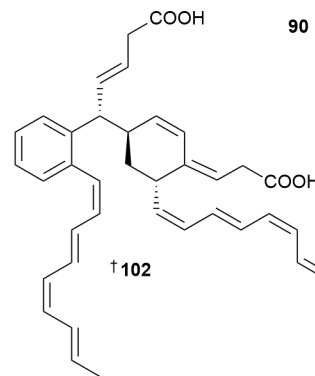

†102

- 28 Actinobacteria *Streptomyces chumphonensis* // (sediment) Indian Ocean // Aromatic acids and leucine derivatives produced from the deep-sea actinomycetes *Streptomyces chumphonensis* SCSIO15079 with antihyperlipidemic activities  
 92 // N // 11-oxo-11-(*o*-tolyl) undecanoic acid // IA vs 7 bact. strains; IA vs 3 HTCLs; IA vs 1 nMCL.  
 93 // N // 13-oxo-13-(*o*-tolyl) tridecanoic acid // IA vs 7 bact. strains; IA vs 3 HTCLs; IA vs 1 nMCL.  
 94 // N // (*E*)-11-(*o*-tolyl) undec-10-enoic acid // IA vs 7 bact. strains; IA vs 3 HTCLs; IA vs 1 nMCL.  
 95 // N // (*E*)-13-(*o*-tolyl) tridec-12-enoic acid // IA vs 7 bact. strains; IA vs 3 HTCLs; IA vs 1 nMCL.  
 96 // N // (*R*)-11-hydroxy-11-(*o*-tolyl) undecanoic acid // IA vs 7 bact. strains; IA vs 3 HTCLs; IA vs 1 nMCL.  
 97 // N // (*R*)-13-hydroxy-13-(*o*-tolyl) tridecanoic acid // IA vs 7 bact. strains; IA vs 3 HTCLs; IA vs 1 nMCL.  
 98 // N // *N*-hydroxy-2-(hydroxyimino)-4-methyl-*N*-(3-methylbutanoyl) pentanamide // IA vs 7 bact. strains; IA vs 3 HTCLs; IA vs 1 nMCL.  
 99 // N // *N*-hydroxy-2-(hydroxyimino)-4-methylpentanamide // IA vs 7 bact. strains; IA vs 3 HTCLs; IA vs 1 nMCL.  
 100 // M // 2-(hydroxyimino)-4-methylpentanamide // IA vs 7 bact. strains; IA vs 3 HTCLs; IA vs 1 nMCL.
- 29 Actinobacteria *Streptomyces youssoufiensis* // \* // Youssoufenes A2 and A3, antibiotic dimeric cinnamoyl lipids from the  $\delta$ dtIA mutant of a marine-derived *Streptomyces* strain  
 101 // N // youssoufene A2 // IA vs 3 bact. strains.  
 102 // N // youssoufene A3 // IA vs 3 bact. strains.

2 Marine microorganisms and phytoplankton:

2.1 Marine-sourced bacteria

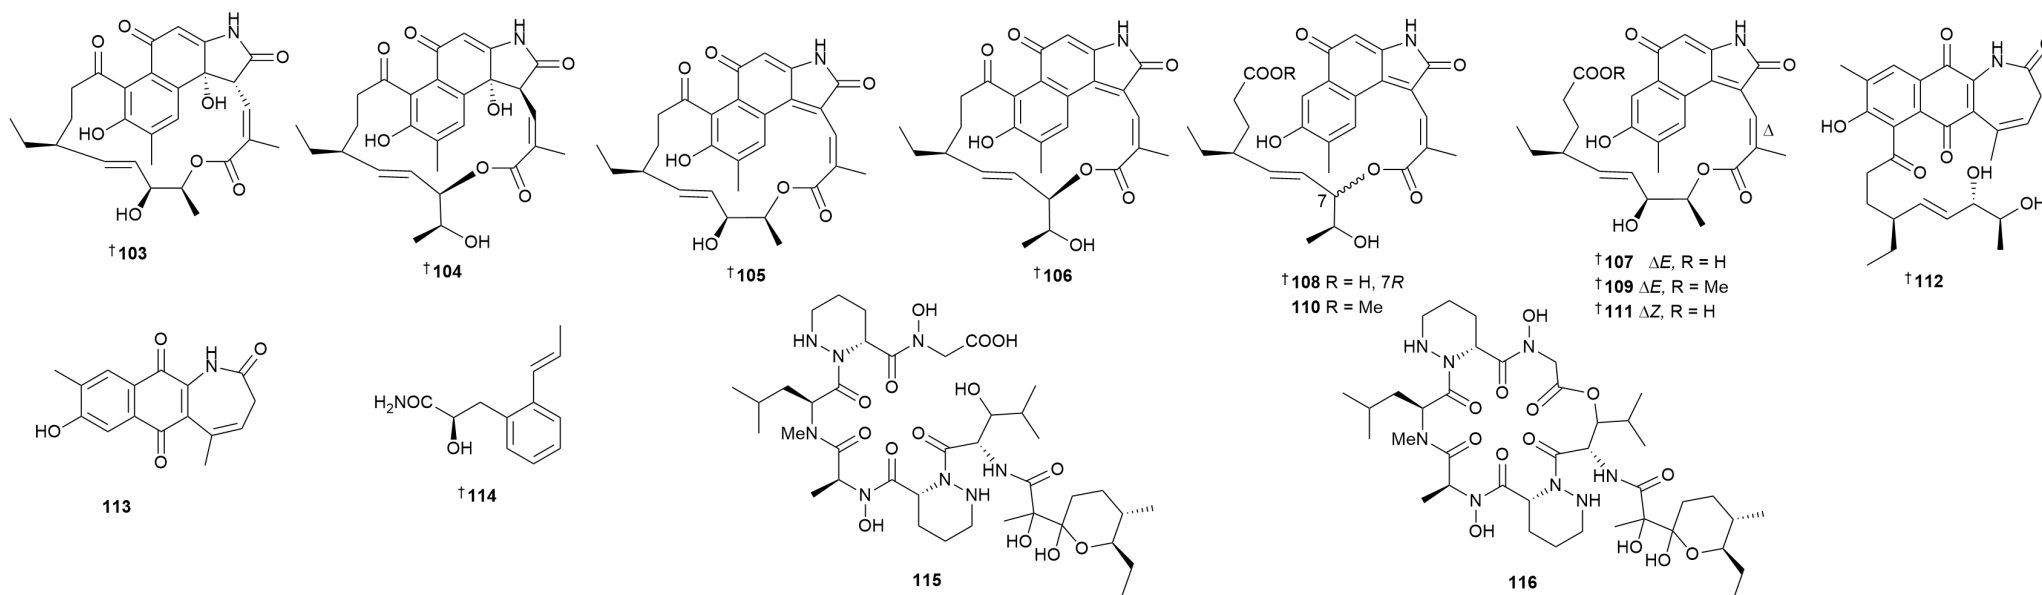

- 30** Actinobacteria *Streptomyces* sp. // (sediment) Pangkep District South Sulawesi Province, Indonesia // New hygrocins K–U and streptophenylpropanamide A and bioactive compounds from the marine-associated *Streptomyces* sp. ZZ1956  
**103** // N // hygrocin K // NT.  
**104** // N // hygrocin L // NT.  
**105** // N // hygrocin M // NT.  
**106** // N // hygrocin N // weak activ. vs 2 HTCLs; weak activ. vs 2 bact. strains.  
**107** // N // hygrocin O // IA vs 2 HTCLs; weak activ. vs 2 bact. strains.  
**108** // N // hygrocin P // NT.  
**109** // N // hygrocin Q // IA to weak activ. vs 2 HTCLs; IA vs 2 bact. strains.  
**110** // N // hygrocin R // weak activ. vs 2 HTCLs; weak activ. vs 2 bact. strains.  
**111** // N // hygrocin S // NT.  
**112** // N // hygrocin T // IA vs 2 HTCLs; IA to weak activ. vs 2 bact. strains.  
**113** // N // hygrocin U // IA vs 2 HTCLs; mod. activ. vs 2 bact. strains.  
**114** // N // streptobenzenepropanamide A // NT.
- 31** Actinobacteria *Streptomyces* sp. // (sediment) Manglares, Peru // Genome-mining-guided discovery and characterization of the PKS-NRPS-hybrid polyoxyperuin produced by a marine-derived Streptomyccete  
**115** // N // polyoxyperuin A *seco* acid // IA vs 6 bact. strains.  
**116** // N // polyoxyperuin A // IA to pot. activ. vs 6 bact. strains.

Key: Main article bibliography reference // Taxonomy // Location // Article title

Compound number // Status // Compound name // Biological activity and Other information

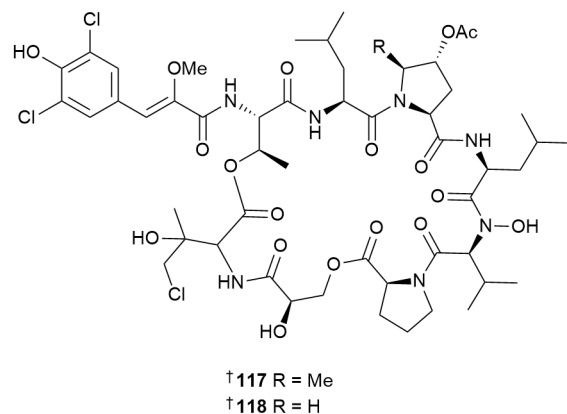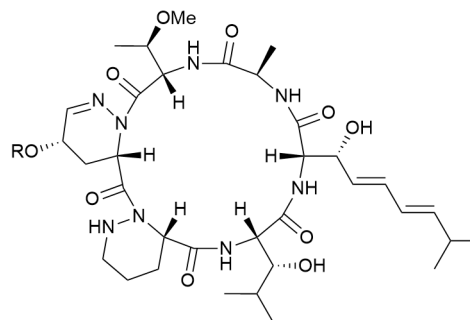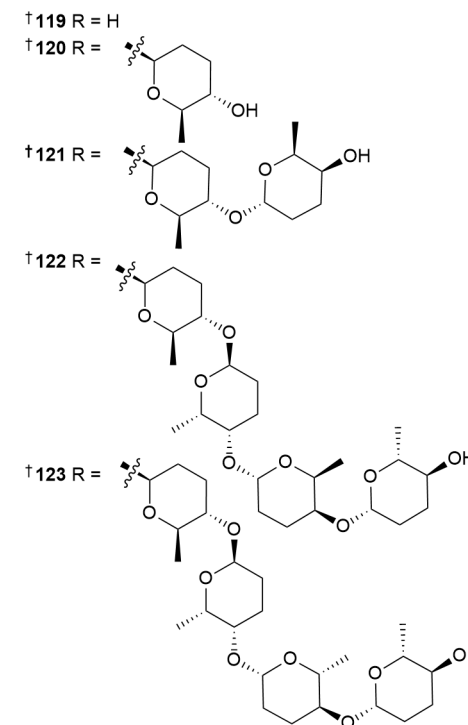

- 32 Actinobacteria *Streptomyces* sp. // (sediment) Dzhigit Bay, Russia // Streptocinnamides A and B, depsipeptides from *Streptomyces* sp. KMM 9044  
 117 // N // streptocinnamide A // potent activ. vs 3 bact. strains.  
 118 // N // streptocinnamide B // NT.
- 33 Actinobacteria *Streptomyces* sp. // (sponge, *Dysidea avara*) Xisha Islands, China // A cyclohexapeptide and its rare glycosides from marine sponge-derived *Streptomyces* sp. OUCMDZ-4539  
 119 // N // pyridapeptide A // IA vs 5 HTCL, IA vs 1 nMCL.  
 120 // N // pyridapeptide B // IA vs 5 HTCL, IA vs 1 nMCL.  
 121 // N // pyridapeptide C // IA to weak activ. vs 5 HTCL, IA vs 1 nMCL.  
 122 // N // pyridapeptide D // weak to mod. activ. vs 5 HTCL, mod. activ. vs nMCL.  
 123 // N // pyridapeptide E // weak to mod. activ. vs 5 HTCL, mod. activ. vs nMCL.

2 Marine microorganisms and phytoplankton: 2.1 Marine-sourced bacteria

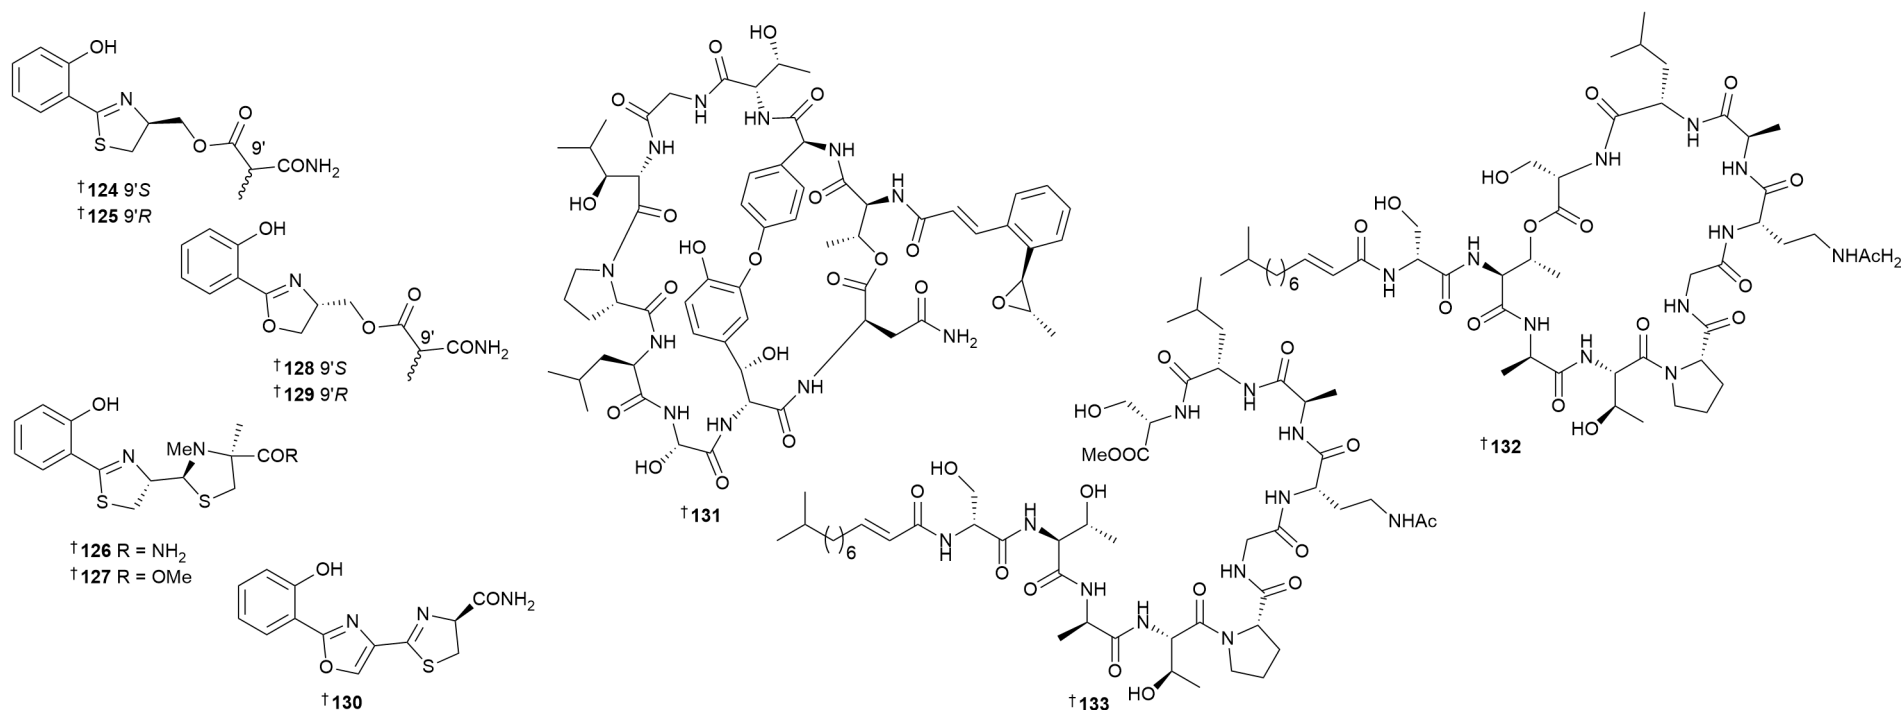

- 34 Actinobacteria *Streptomyces diastaticus* // (sponge, *Axinellida* sp.) Apo Island, Negros Oriental, Philippines // Feature-based molecular networking-guided discovery of siderophores from a marine mesophotic zone *Axinellida* sponge-associated actinomycete *Streptomyces diastaticus* NBU2966  
 124 // N // (4'S, 9'S)-pulicatin J // IA vs 4 bact. strains.; IA vs antioxid.  
 125 // N // (4'S, 9'R)-pulicatin J // IA vs 4 bact. strains.; IA vs antioxid.  
 126 // N // thiazostatin C // IA vs 4 bact. strains.; IA vs antioxid.  
 127 // N // methyl thiazostatin B // IA vs 4 bact. strains.; IA vs antioxid.  
 128 // N // (4'S, 9'S)-spoxazomicin E // IA vs 4 bact. strains.; IA vs antioxid.  
 129 // N // (4'S, 9'R)-spoxazomicin E // IA vs 4 bact. strains.; IA vs antioxid.  
 130 // N // spoxazomicin F // IA vs 4 bact. strains.; IA vs antioxid.
- 35 Actinobacteria *Streptomyces* sp. // (sediment) Oido, Siheung, Gyeonggi-do, the Republic of Korea // Epoxinamide: an epoxy cinnamoyl-containing nonribosomal peptide from an intertidal mudflat-derived *Streptomyces* sp.  
 131 // N // epoxinamide // IA vs murine TCL; weak activ. vs quinone reductase; IA vs angiogenesis.
- 36 Actinobacteria *Streptomyces* sp. // (sediment) Anmyeondo, Republic of Korea // Taeanamides A and B, nonribosomal lipo-decapeptides isolated from an intertidal-mudflat-derived *Streptomyces* sp.  
 132 // N // taeanamide A // IA vs 6 HTCL; IA vs 6 bact. strains; IA vs 4 fungal strains; weak activ. vs *M. tuberculosis*.  
 133 // N // taeanamide B // mod. activ. vs 6 HTCL; IA vs 6 bact. strains; IA vs 4 fungal strains; IA vs *M. tuberculosis*.

Key: Main article bibliography reference // Taxonomy // Location // Article title

Compound number // Status // Compound name // Biological activity and Other information

## 2 Marine microorganisms and phytoplankton:

## 2.1 Marine-sourced bacteria

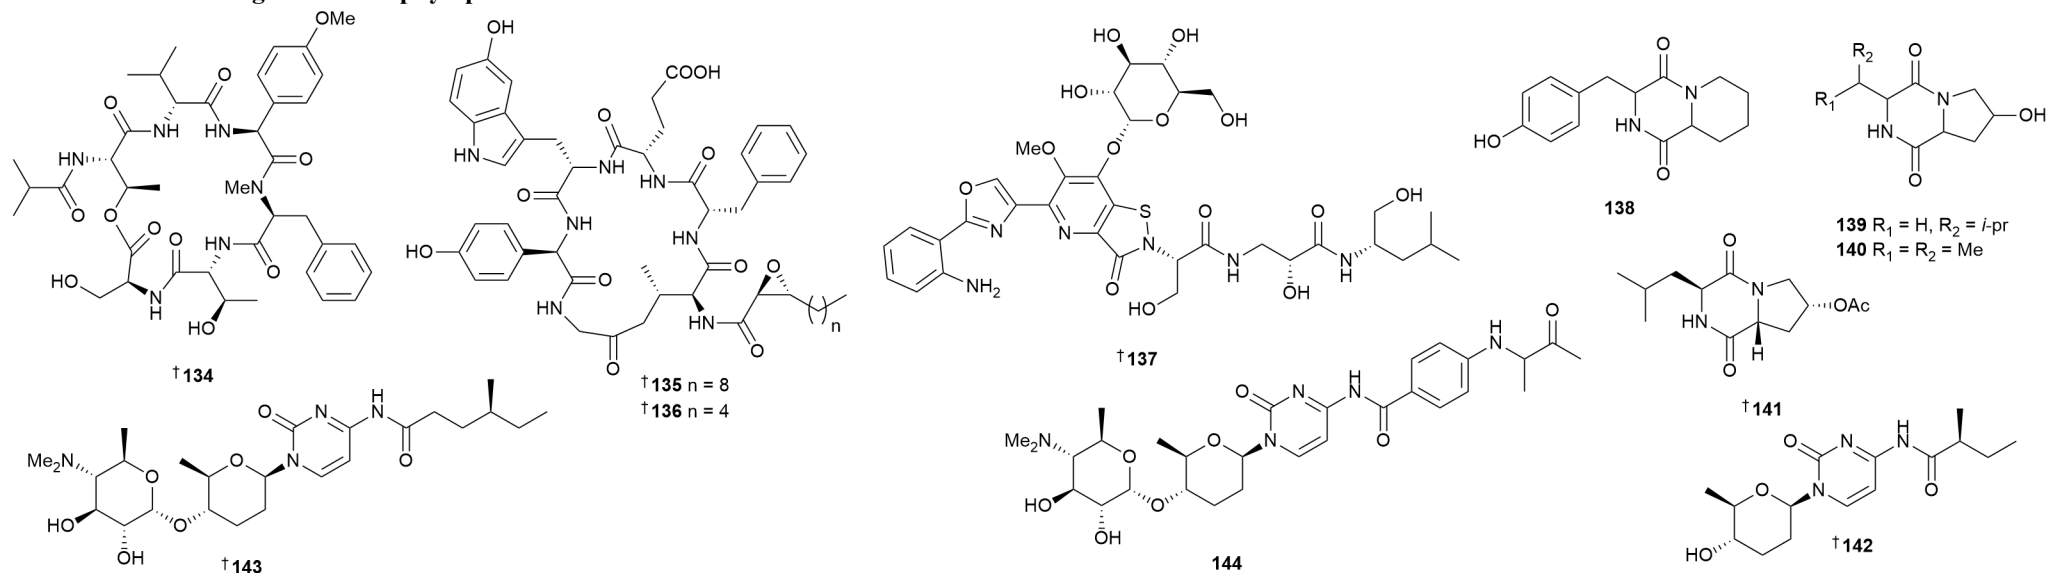

- 37** Actinobacteria *Streptomyces* sp. // (sponge, *Haliclona* sp.) Daya Bay, Shenzhen, China // A new xanthostatin from the sponge-associated actinomycete *Streptomyces* sp. SCSIO 40064  
**134** // N // xanthostatin B // IA inhib. glucosidase, porcine pancreatic elastase, tyrosinase, and acetylcholinesterase; IA vs 6 bact. strains.
- 38** Actinobacteria *Streptomyces* sp. // (sediment) Beolgyo, South Korea // Cystargamides C and D, new cyclic lipopeptides from a tidal mudflat-derived *Streptomyces* sp. JMS132.  
**135** // N // cystargamide C // IA vs antioxid.  
**136** // N // cystargamide D // IA vs antioxid.
- 39** Actinobacteria *Streptomyces* sp. // (sediment) Prince Edward Island, Canada // Discovery of levesquamide B through global natural product social molecular networking  
**137** // N // levesquamide B // NT.
- 40** Actinobacteria *Streptomyces* sp. // (sediment) Kenting coast, Taiwan // Probing anti-leukemic metabolites from marine-derived *Streptomyces* sp. LY1209  
**138** // N // 3-(4-hydroxybenzyl)-hexahydro-pyrido[1,2-a]pyrazine-1,4-dione // IA vs 1 HTCL.  
**139** // N // cyclo(Leu-hydroxy-Pro) // IA vs 1 HTCL.  
**140** // N // (3*S*,7*R*,8*aS*)-7-hydroxy-3-isopropylhexahydropyrrolo[1,2-a]pyrazine-1,4-dione // IA vs 1 HTCL.
- 41** Actinobacteria *Streptomyces* sp. // (sediment), Haikou, China // Diketopiperazine and enterotoxin analogues from the mangrove derived-soil *Streptomyces* sp. SCSIO 41400  
**141** // N // cyclo-(D-8-acetoxyl-Pro-L-Leu) // IA inhib. of AChE and pancreatic lipase.
- 42** Actinobacteria *Streptomyces* sp. // (sediment) Enggano Island, Indonesia // High plasticity of the amicetin biosynthetic pathway in *Streptomyces* sp. SHP 22-7 led to the discovery of streptocytosine P and cytosaminomycins F and G and facilitated the production of 12F-plicacetin  
**142** // N // streptocytosine P // IA vs 2 fungal strains; IA vs 10 bact strains; IA vs 1 HTCL.  
**143** // N // cytosaminomycin F // IA vs 2 fungal strains; IA to weak activ. vs 10 bact. strains; IA vs 1 HTCL.  
**144** // N // cytosaminomycin G // IA vs 2 fungal strains; IA to mod. activ. vs 10 bact. strains; IA vs. *M. tuberculosis*; weak activ. vs 1 HTCL.

**Key:** Main article bibliography reference // Taxonomy // Location // Article title

Compound number // Status // Compound name // Biological activity and Other information

## 2 Marine microorganisms and phytoplankton:

### 2.1 Marine-sourced bacteria

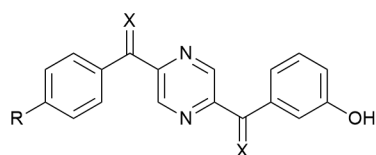

145 X = H, H, R = H  
146 X = O, R = OH

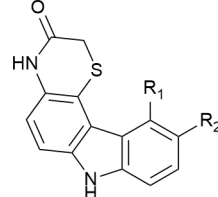

147 R<sub>1</sub> = H, R<sub>2</sub> = H  
148 R<sub>1</sub> = Cl, R<sub>2</sub> = OMe

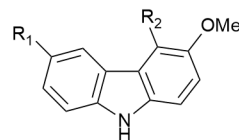

149 R<sub>1</sub> = OMe, R<sub>2</sub> = Cl  
150 R<sub>1</sub> = H, R<sub>2</sub> = Br

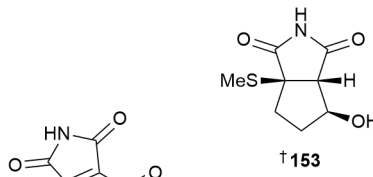

†153

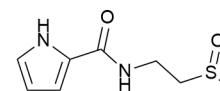

154

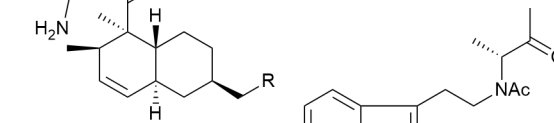

†151 R = H  
†152 R = OH

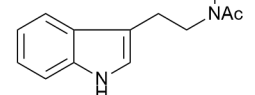

†157

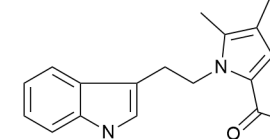

158

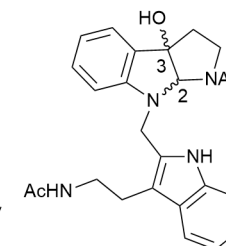

†155 2S, 3R  
†156 2R, 3S

- 43 Actinobacteria *Streptomyces* sp. // (sediment) Jolla Submarine Canyon, La Jolla, California // Actinopolymorphols E and F, pyrazine alkaloids from a marine sediment-derived bacterium *Streptomyces* sp  
145 // N // actinopolymorphol E // IA vs 6 bact. strains.  
146 // N // actinopolymorphol F // IA to weak activ. vs 6 bact. strains.
- 44 Actinobacteria *Streptomyces diacarni* // (coral, *Acropora austera*) Zhongsha Islands, China // Halo- and thiocarbazomycins from coral- and coral reef sands-derived Actinomycetes  
147 // N // thiocarbazomycin A // IA vs 14 bact. strains.  
148 // N // thiocarbazomycin B // IA vs 14 bact. strains.  
149 // N // chlocarbazomycin E // IA vs 14 bact. strains.  
150 // N // brocarbazomycin A // IA vs 14 bact. strains.
- 45 Actinobacteria *Streptomyces* sp // (isopod, *Ligia exotica*) Seocheon, Chungcheongnam-do, Korea // Ligiamycins A and B, decalin-amino-maleimides from the co-culture of *Streptomyces* sp. and *Achromobacter* sp. isolated from the marine wharf roach, *Ligia exotica*  
151 // N // ligiamycin A // IA to weak activ vs. 6 bact. strains; IA vs. 4 fungal strains; IA vs. 5 HTCL.  
152 // N // ligiamycin B // IA vs. 6 bact. strains; IA vs. 4 fungal strains; IA vs. 5 HTCL.
- 46 Actinobacteria *Streptomyces bacillaris* // (sediment) Jeju Island, Korea // Inhibitory effects of nitrogenous metabolites from a marine-derived *Streptomyces bacillaris* on isocitrate lyase of *Candida albicans*  
153 // N // bacillimide // IA vs 1 fungus; IA inhib. fungal isocitrate lyase.  
154 // M // bacillapyrrole // IA vs 1 fungus; IA inhib. fungal isocitrate lyase.
- 47 Actinobacteria *Streptomyces* sp // (shrimp, *Penaeus* sp.) Zhoushan archipelago, Zhejiang, East China Sea // Streptoindoles A–D, novel antimicrobial indole alkaloids from the marine-associated actinomycete *Streptomyces* sp. ZZ1118  
155 // N // streptoindole A // weak activ. vs 2 bact. strains; weak activ. vs 1 fungal strain.  
156 // N // streptoindole B // weak to mod. activ. vs 2 bact. strains; mod. activ. vs 1 fungal strain.  
157 // N // streptoindole C // IA to mod. activ. vs 2 bact. strains; mod. activ. vs 1 fungal strain.  
158 // N // streptoindole D // IA to weak activ. vs 2 bact. strains; IA vs 1 fungal strain; XRD.

Key: Main article bibliography reference // Taxonomy // Location // Article title

Compound number // Status // Compound name // Biological activity and Other information



2 Marine microorganisms and phytoplankton:

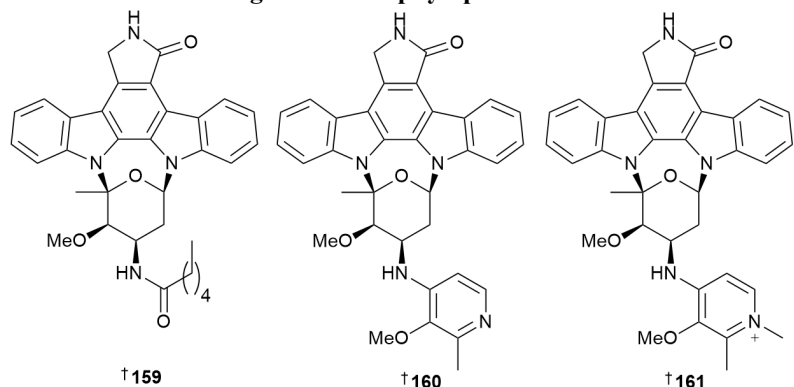

2.1 Marine-sourced bacteria

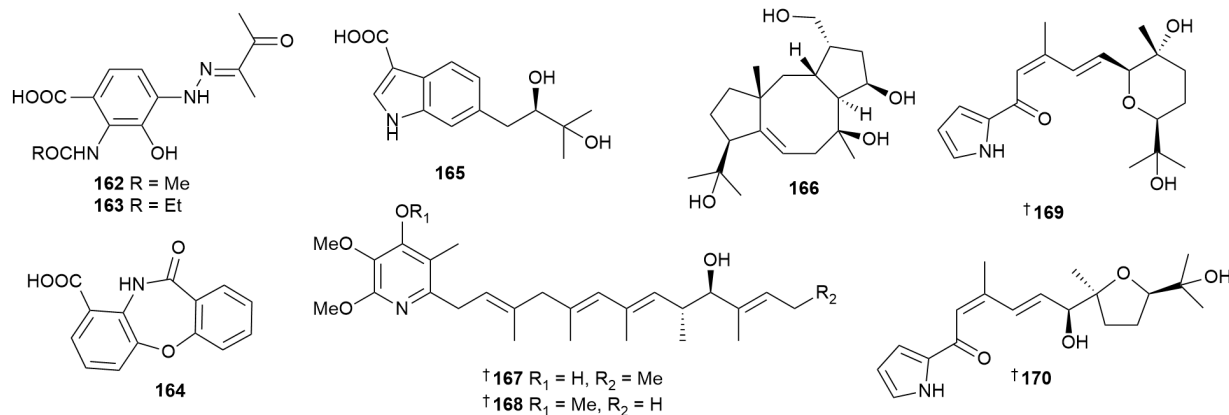

- 48 Actinobacteria *Streptomyces* sp. // (driftwood) Beibu Gulf, Guangxi, China // Cytotoxic indolocarbazoles from a marine-derived *Streptomyces* sp. OUCMDZ-5380  
**159** // N // streptocarbazole F // IA to mod. activ. vs 12 HTCLs.  
**160** // N // streptocarbazole G // IA to mod. activ. vs 12 HTCLs.  
**161** // N // streptocarbazole H // IA to weak activ. vs 12 HTCLs.
- 49 Actinobacteria *Streptomyces* sp. // (sediment) Pearl River Estuary, China // Two new phenylhydrazone derivatives from the Pearl river estuary sediment-derived *Streptomyces* sp. SCSIO 40020  
**162** // N // penzonemycin A // IA vs 4 HTCLs; IA vs 4 bact. strains; IA vs 3 fungal strains; IA inhib. glucosidase; XRD.  
**163** // N // penzonemycin B // NT.  
**164** // N // demethylmycemycin A // NT.
- 50 Actinobacteria *Streptomyces malaysiensis* // (sponge) Wenchang, Hainan province, China // New diterpene and indole alkaloid analogs from the *Streptomyces malaysiensis* SCSIO 41397  
**165** // N // streptoprenylindole D // IA vs 1 bact. strain.  
**166** // N // 15-hydroxycyclooctatin // IA vs 1 bact. strain.
- 51 Actinobacteria *Streptomyces* sp. // (sediment) Yagong island, Sansha City, Hainan Province, China // New piericidin derivatives from the marine-derived *Streptomyces* sp. SCSIO 40063 with cytotoxic activity  
**167** // N // piericidin A5 // IA vs 4 HTCLs.  
**168** // N // piericidin G1 // IA vs 4 HTCLs.
- 52 Actinobacteria *Streptomyces* sp // (sediment) East Sea of Korea // Discovery and photoisomerization of new pyrrolsesquiterpenoids glaciapyrroles D and E, from deep-sea sediment *Streptomyces* sp.  
**169** // N // glaciapyrrole D // weak activ. vs influenza A virus.  
**170** // N // glaciapyrrole E // IA vs influenza A virus; XRD.

**2 Marine microorganisms and phytoplankton: 2.1 Marine-sourced bacteria**

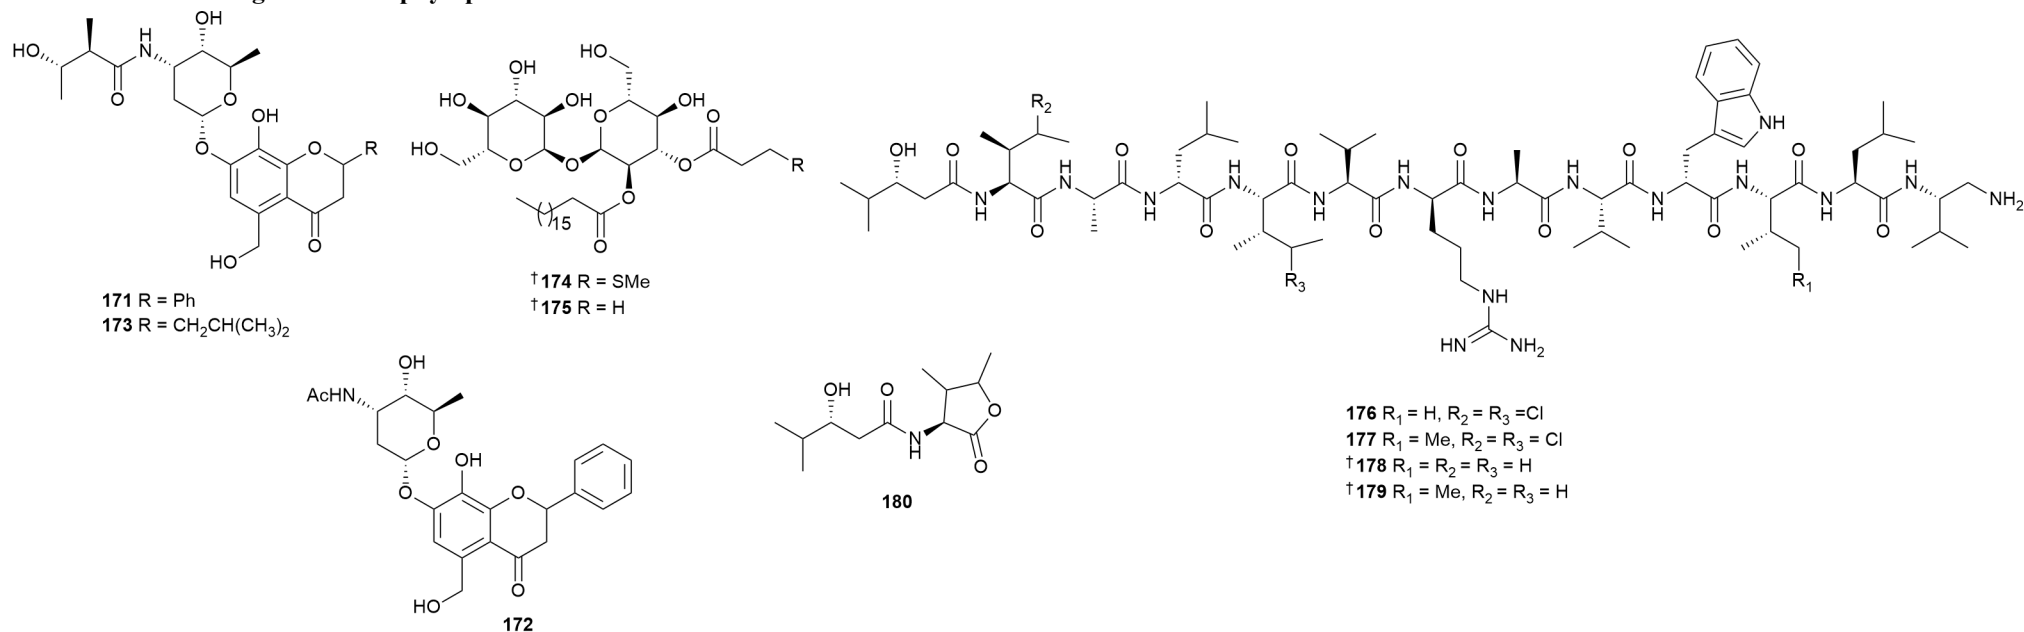

- 53** Actinobacteria *Streptomyces* sp. // (sediment) Muan, Republic of Korea // Actinoflavosides B–D, flavonoid type glycosides from tidal mudflat-derived *Actinomyces*  
**171** // N // actinoflavoside B // IA vs 4 bact. strains; IA to weak vs immunomod. activ.  
**172** // N // actinoflavoside C // IA vs 4 bact. strains; IA to weak vs immunomod. activ.  
**173** // N // actinoflavoside D // IA vs 4 bact. strains; IA to weak vs immunomod. activ.
- 54** Actinobacteria *Tsukamurella pseudospumae* // (sediment) Indian Ocean // New glycosylated secondary metabolites from marine-derived bacteria  
**174** // N // tsukalipid A // IA vs 6 HTCLs.  
**175** // N // tsukalipid B // IA vs 6 HTCLs.
- 55** Bacteroidetes *Aquimarina* sp. // // Aquimarins, peptide antibiotics with amino-modified C-termini from a sponge-derived *Aquimarina* sp. bacterium  
**176** // N // aquimarin A // IA to pot. activ. vs 8 bact. strains, IA vs 1 HTCL, IA vs 3 nMCLs.  
**177** // N // aquimarin B // IA to pot. activ. vs 8 bact. strains, IA vs 1 HTCL, IA vs 3 nMCLs.  
**178** // N // aquimarin C // IA to pot. activ. vs 8 bact. strains, IA vs 1 HTCL, IA to weak activ. vs 3 nMCLs; total synth. achieved.  
**179** // N // aquimarin D // IA to pot. activ. vs 8 bact. strains, IA vs 1 HTCL, IA to weak activ. vs 3 nMCLs; total synth. achieved.  
**180** // N // aquimarin E // NT.

2 Marine microorganisms and phytoplankton: 2.1 Marine-sourced bacteria

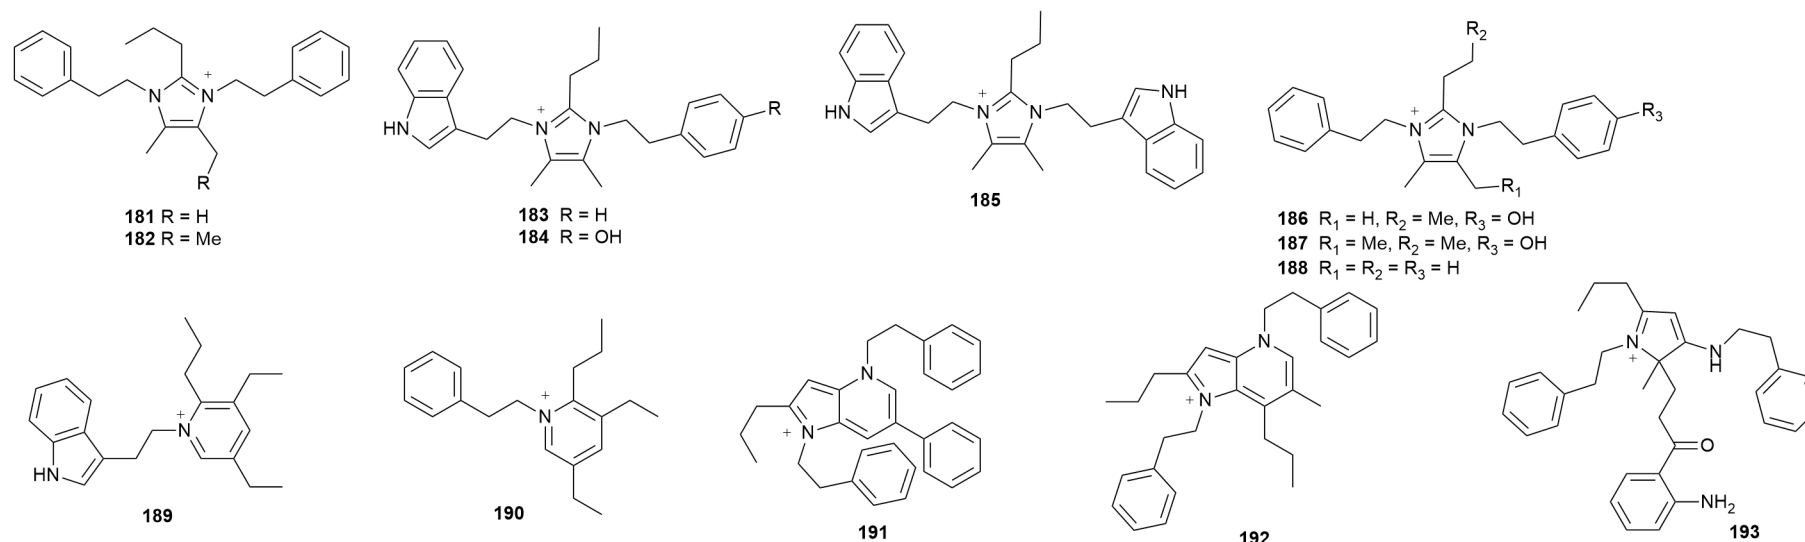

- 56 Bacteroidetes *Tenacibaculum discolor* // (red alga, *Chandracanthus chamisoii*) Paracas Bay, Peru // Discovery and biosynthesis of antimicrobial phenethylamine alkaloids from the marine flavobacterium *Tenacibaculum discolor* sv11  
**181** // N // discolin A // IA to mod. activ. vs 6 bact. strains; IA vs 2 fungal strains; IA vs *C. elegans*.  
**182** // N // discolin B // IA to weak activ. vs 6 bact. strains; IA vs 2 fungal strains; IA vs *C. elegans*.
- 57 Bacteroidetes *Tenacibaculum discolor* // (red alga, *Chandracanthus chamisoii*) Paracas Bay, Peru // Seven alkaloids isolated from marine flavobacterium *Tenacibaculum discolor* sv11  
**183** // N // discolin C // IA to mod. activ. vs 5 bact. strains; IA vs 1 fungal strain.  
**184** // N // discolin D // IA vs 5 bact. strains; IA vs 1 fungal strain.  
**185** // N // discolin E // IA to mod. activ. vs 5 bact. strains; weak activ. vs 1 fungal strain.  
**186** // N // discolin F // IA vs 5 bact. strains; IA vs 1 fungal strain.  
**187** // N // discolin G // IA vs 5 bact. strains; IA vs 1 fungal strain.  
**188** // N // discolin H // IA vs 5 bact. strains; IA vs 1 fungal strain.  
**189** // N // dispyridine A // IA vs 5 bact. strains; IA vs 1 fungal strain.
- 56 Bacteroidetes *Tenacibaculum discolor* // (red alga, *Chandracanthus chamisoii*) Paracas Bay, Peru // Discovery and biosynthesis of antimicrobial phenethylamine alkaloids from the marine flavobacterium *Tenacibaculum discolor* sv11  
**190** // N // dispyridine // IA vs 6 bact. strains; IA vs 2 fungal strains; IA vs *C. elegans*.  
**191** // N // dispyrrolopyridine A // IA to pot. activ. vs 6 bact. strains; mod. activ. vs 2 fungal strains; weak activ. vs *C. elegans*.  
**192** // N // dispyrrolopyridine B // IA to mod. activ. vs 6 bact. strains; IA to weak activ. vs 2 fungal strains; IA vs *C. elegans*.  
**193** // N // dispyrrole // IA to mod. activ. vs 6 bact. strains; IA vs 2 fungal strains; IA vs *C. elegans*.

Key: Main article bibliography reference // Taxonomy // Location // Article title

Compound number // Status // Compound name // Biological activity and Other information

2 Marine microorganisms and phytoplankton: 2.1 Marine-sourced bacteria

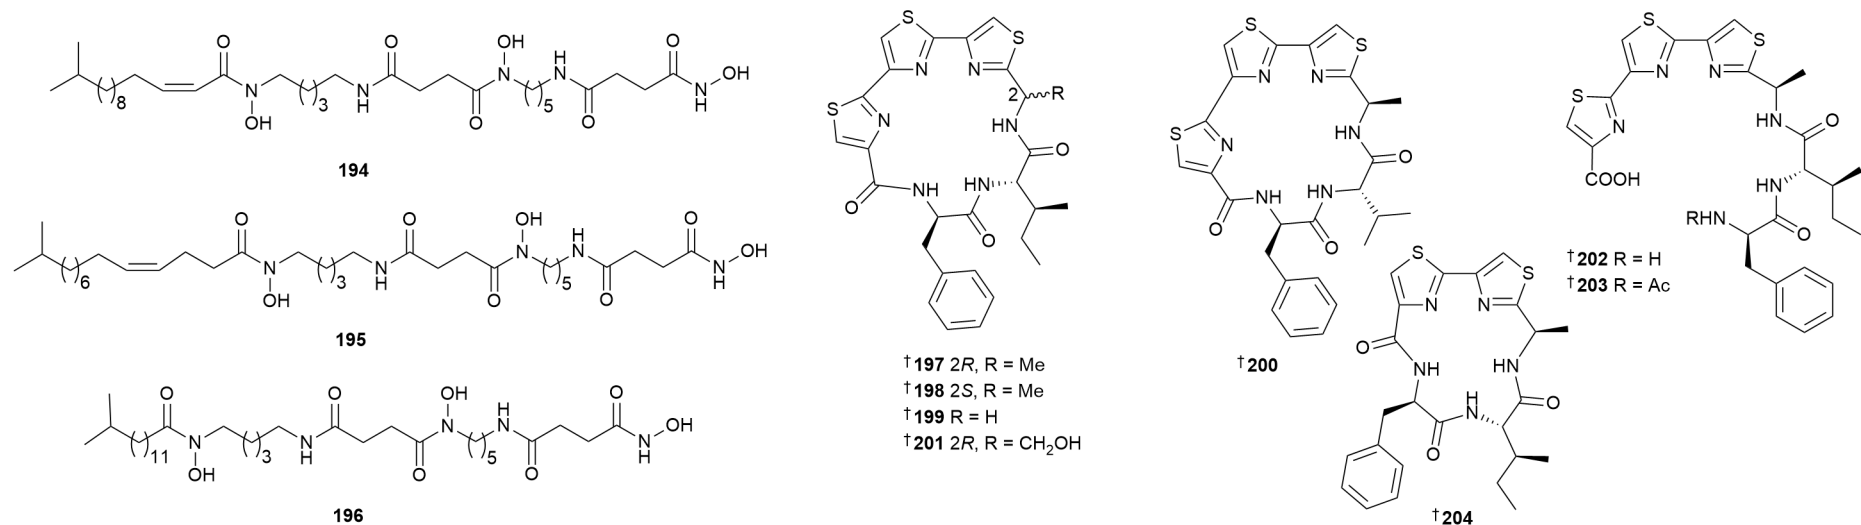

- 58** Bacteroidetes *Tenacibaculum* sp // (coral *Favia* sp.) // Tenacibactins K–M, cytotoxic siderophores from a coral-associated gliding bacterium of the genus *Tenacibaculum*  
**194** // N // tenacibactin K // weak activ. vs 2 nMCL.  
**195** // N // tenacibactin L // IA to weak activ. vs 2 nMCL.  
**196** // N // tenacibactin M // mod. activ. vs 2 nMCL.
- 59** Firmicutes *Bacillus* sp. // (biofilm) Port Shelter, Hong Kong // Bathiapeptides: polythiazole-containing peptides from a marine biofilm-derived *Bacillus* sp.  
**197** // N // bathiapeptide A1 // weak to mod. cytotox. vs 4 HTCLs; XRD.  
**198** // N // bathiapeptide A2 // IA to weak cytotox. vs 4 HTCLs.  
**199** // N // bathiapeptide B // weak cytotox. vs 4 HTCLs.  
**200** // N // bathiapeptide C // weak cytotox. vs 4 HTCLs; XRD.  
**201** // N // bathiapeptide D // IA vs 4 HTCLs.  
**202** // N // bathiapeptide E // IA vs 4 HTCLs.  
**203** // N // bathiapeptide F // IA vs 4 HTCLs.  
**204** // N // bathiapeptide G // IA vs 4 HTCLs.

2 Marine microorganisms and phytoplankton: 2.1 Marine-sourced bacteria

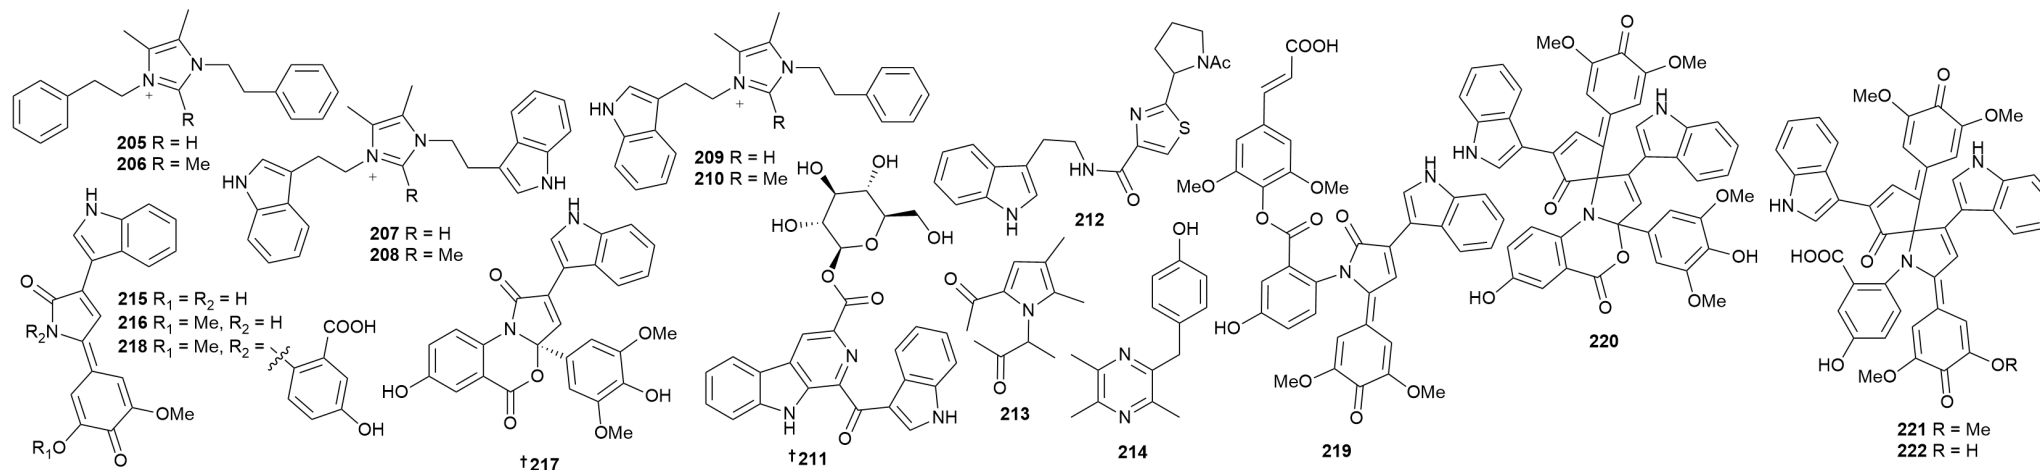

- 60 Firmicutes *Bacillus* sp // (sponge, *Cinachyrella apion*) Ramrod Key, Florida, USA // Bacillimidazoles A–F, imidazolium-containing compounds isolated from a marine *Bacillus*  
 205 // N // bacillimidazole A // IA vs 3 bact. strains.  
 206 // N // bacillimidazole B // IA vs 3 bact. strains.  
 207 // N // bacillimidazole C // IA vs 3 bact. strains.  
 208 // N // bacillimidazole D // IA vs 3 bact. strains.  
 209 // N // bacillimidazole E // IA vs 3 bact. strains.  
 210 // N // bacillimidazole F // IA vs 3 bact. strains.
- 54 Firmicutes *Bacillus siamensis* // (green alga, *Caulerpa* sp.) Cu Lao Cham peninsula, Vietnam; (marine sediment) Indian Ocean // New glycosylated secondary metabolites from marine-derived bacteria  
 211 // N // pitryiacitrin D // IA to weak cytotox. vs 6 HTCLs.
- 61 Firmicutes *Bacillus atrophaeus* // (sponge, *Dysidea avara*) South China Sea // Bacillamide F, from marine *Bacillus atrophaeus* C89, preliminary effects on leukemia cell lines  
 212 // N // bacillamide F // IA vs 6 HTCL.
- 62 Firmicutes *Bacillus subtilis* // (sediment) Mariana Trench // (±)-bacillipyrrole A and bacillipyrazine A from the Mariana Trench-associated bacterium *Bacillus subtilis* SY2101  
 213 // N // (±)-bacillipyrrole A // IA vs 1 HTCL; IA vs 2 bact. strains; IA vs 1 fungal strain.  
 214 // N // bacillipyrazine A // IA vs 1 HTCL; IA vs 2 bact. strains; IA vs 1 fungal strain.
- 63 Proteobacteria *Phaeobacter inhibens* // // Structural elucidation of cryptic algacides in marine algal-bacterial symbioses by NMR spectroscopy and microED  
 215 // N // sinacidin A // IA to weak activ. vs 24 bact strains; IA vs 3 fungal strains; weak algacidal activ.  
 216 // N // sinacidin B // IA to weak activ. vs 24 bact strains; IA vs 3 fungal strains; weak algacidal active; microED.  
 217 // N // sinatryptin A // IA to mod. activ. vs 24 bact strains; IA vs 3 fungal strains; weak algacidal activ.  
 218 // N // sinatryptin B // IA as algacide  
 219 // N // sinatryptin C // IA as algacide  
 220 // N // sinamicin A // weak algacidal activ.  
 221 // N // sinamicin B // NT; microED.  
 222 // N // sinamicin C // NT; microED.

Key: Main article bibliography reference // Taxonomy // Location // Article title

Compound number // Status // Compound name // Biological activity and Other information

2 Marine microorganisms and phytoplankton: 2.1 Marine-sourced bacteria

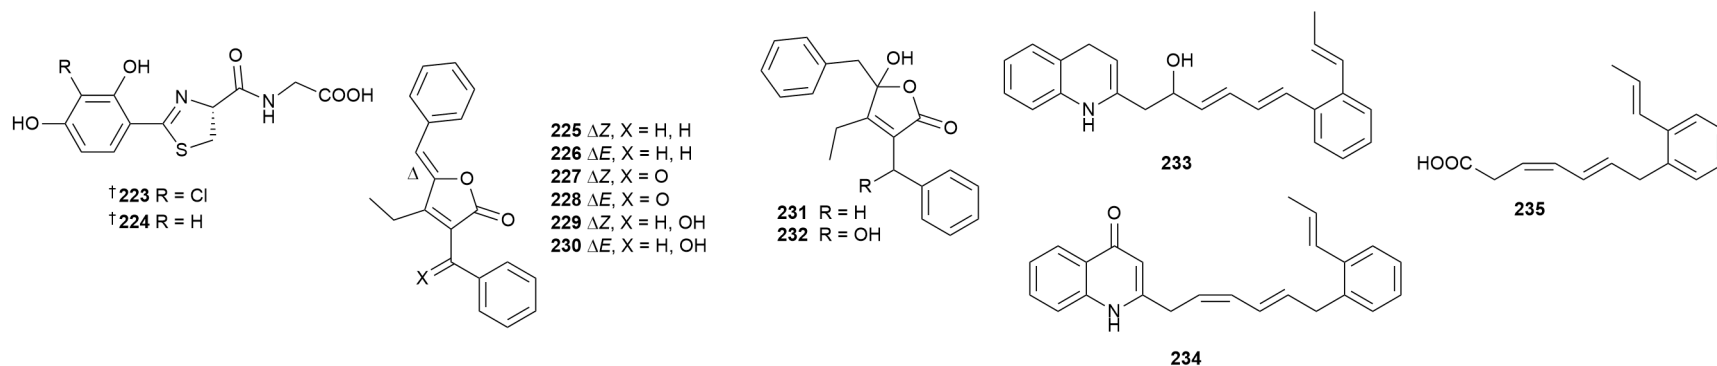

- 64 Proteobacteria *Teredinibacter turnerae* // (shipworm, *Bankia gouldi*) // Halogenated metal-binding compounds from shipworm symbionts  
 223 // N // teredinibactin A // NT.  
 224 // N // dechloroteredinibactin A // NT.
- 65 Proteobacteria *Plesiocystis pacifica* // // New deoxyenhygrolides from *Plesiocystis pacifica* provide insights into butenolide core biosynthesis  
 225 // N // deoxyenhygrolide C // NT.  
 226 // N // deoxyenhygrolide D // NT.  
 227 // N // deoxyenhygrolide E // NT.  
 228 // N // deoxyenhygrolide F // NT.  
 229 // N // deoxyenhygrolide G // IA vs 6 bact. strains.  
 230 // N // deoxyenhygrolide H // NT.  
 231 // N // deoxyenhygrolide I // NT.  
 232 // N // deoxyenhygrolide J // IA vs 6 bact. strains.
- 66 Proteobacteria *Marinobacterium* sp. // (coral, *Euphyllia* sp. ) // Marinoquinolones and marinobactaic acid: antimicrobial and cytotoxic *ortho*-dialkylbenzene-class metabolites produced by a marine obligate gammaproteobacterium of the genus *Marinobacterium*  
 233 // N // marinoquinolone A // weak activ. vs nMCL; IA to weak activ. vs 4 bact. strains; IA to weak activ. vs 3 fungal strains; XRD.  
 234 // N // marinoquinolone B // weak activ. vs nMCL; IA vs 4 bact. strains; IA vs 3 fungal strains.  
 235 // N // marinobactaic acid // weak activ. vs nMCL; IA vs 4 bact. strains; IA vs 3 fungal strains.

2 Marine microorganisms and phytoplankton: 2.1 Marine-sourced bacteria

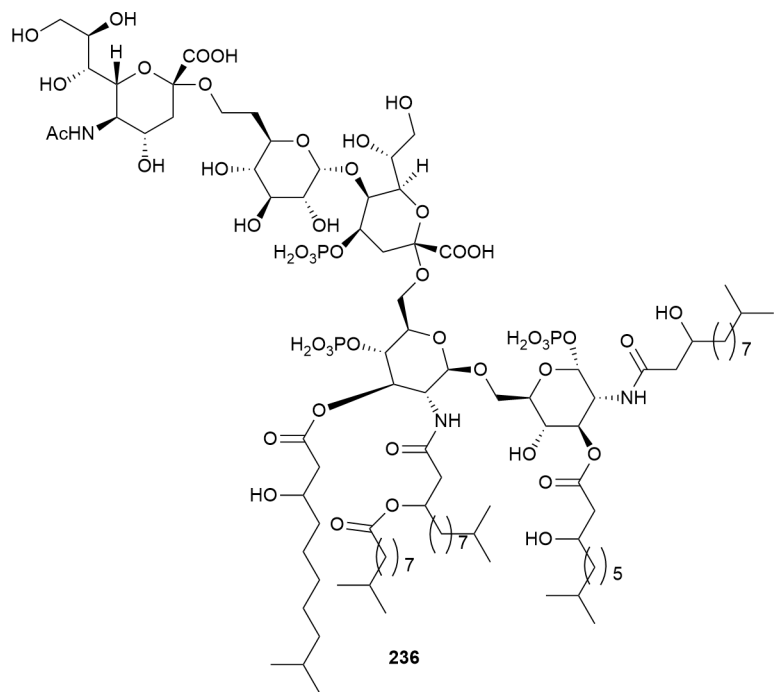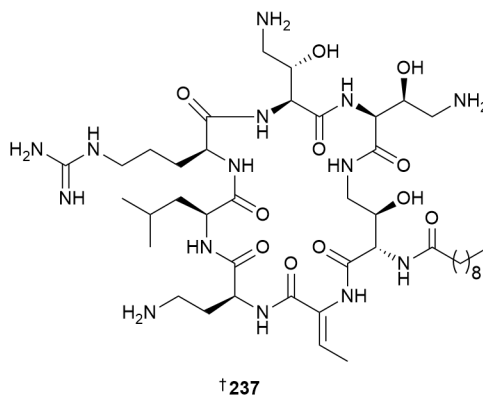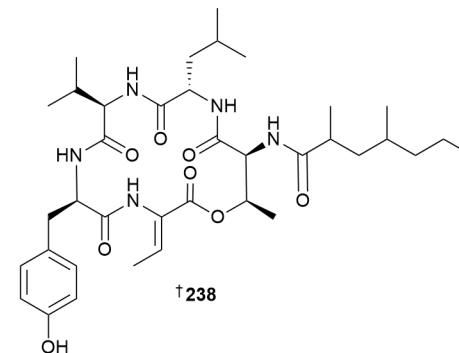

- 67 Proteobacteria *Idiomarina zobellii* // (seawater) North-western Pacific Ocean // Structure of the lipooligosaccharide from the deep-sea marine bacterium *Idiomarina zobellii* KMM 231T, isolated at a depth of 4000 meters  
**236** // N // lipid A from *Idiomarina zobellii* KMM 231T // NT.
- 72 Actinobacteria *Pseudoalteromonas* sp. // // Total synthesis and structural elucidation of ogipeptins  
**237** // R // ogipeptin A // NT; total synth. achieved.
- 73 Actinobacteria *Streptomyces* sp. // // Total synthesis and stereochemistry establishment of tumescenamide A  
**238** // R // tumescenamide A // NT; total synth. achieved.

2 Marine microorganisms and phytoplankton: 2.2 Cyanobacteria

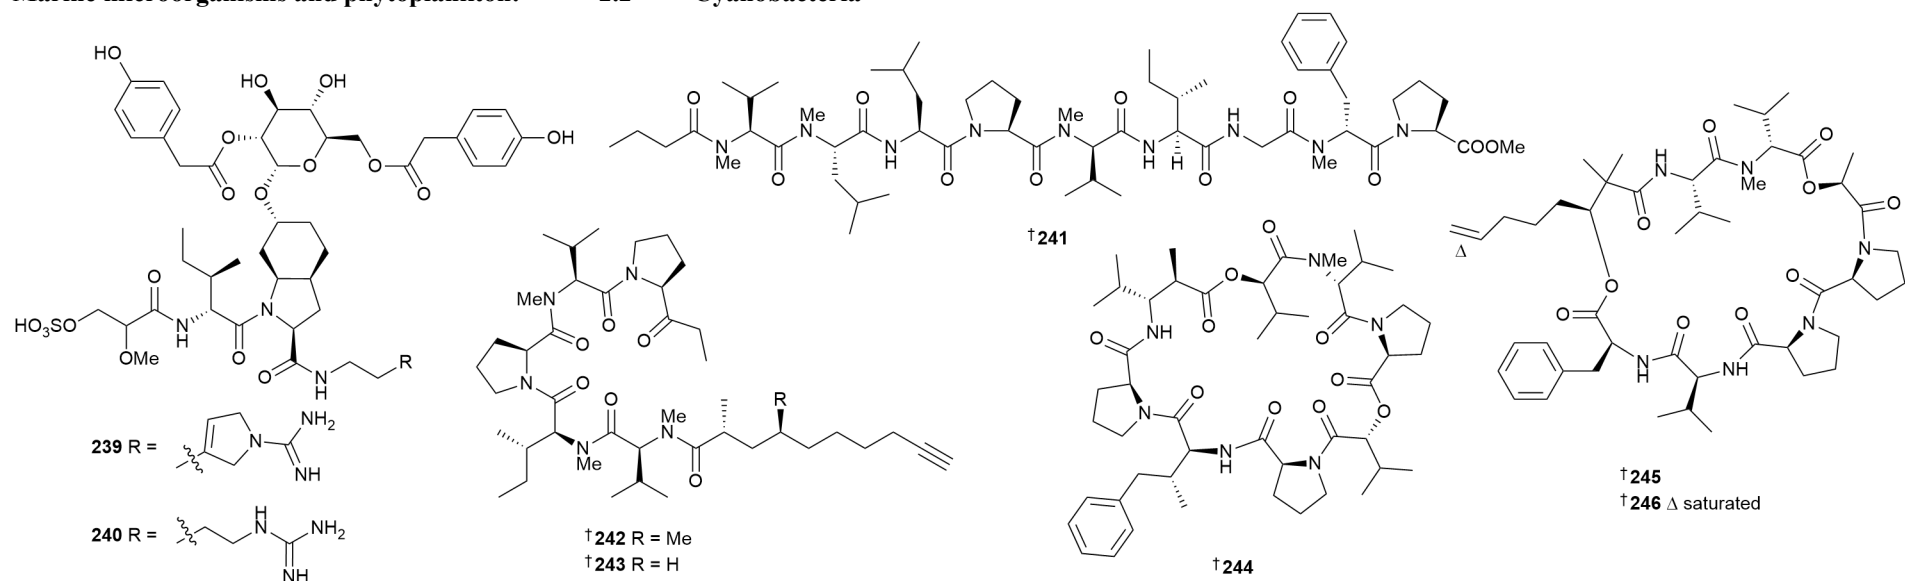

- 96 Cyanobacteria *Nostoc* sp. // Varlaxudden, Porvoo, Finland // Discovery of varlaxins, new aeruginosin-type inhibitors of human trypsins  
 239 // N // varlaxin 1046A // pot. activ. vs 1 porcine and 3 hum. trypsins.  
 240 // N // varlaxin 1022A // pot. activ. vs 1 porcine and 3 hum. trypsins.
- 97 Cyanobacteria *Oscillatoria* sp. // Paracel Islands, China Sea // Targeted discovery of amantamide B, an ion channel modulating nonapeptide from a South China Sea *Oscillatoria* cyanobacterium  
 241 // N // amantamide B // IA vs 4 bact strains; IA to weak activ. vs 3 HTCL; weak activ. vs neocortical neuron SCO.
- 98 Cyanobacteria *Okeania* sp. // Odo, Okinawa Prefecture, Japan // Odookeanynes A and B, acetylene-containing lipopeptides from an *Okeania* sp. marine cyanobacterium  
 242 // N // odookeanyne A // IA vs adipose tissue-derived stem cells.  
 243 // N // odookeanyne B // IA adipose tissue-derived stem cells.
- 99 Cyanobacteria *Symploca hydnooides* // Trikora beach, Bintan Island, Indonesia // Triproamide and pemukainalides, cyclic depsipeptides from the marine cyanobacterium *Symploca hydnooides*  
 244 // N // triproamide // IA vs 1 HTCL.  
 245 // N // pemukainalide A // weak activ. vs 1 HTCL.  
 246 // N // pemukainalide B // IA vs 1 HTCL.



2 Marine microorganisms and phytoplankton: 2.2 Cyanobacteria

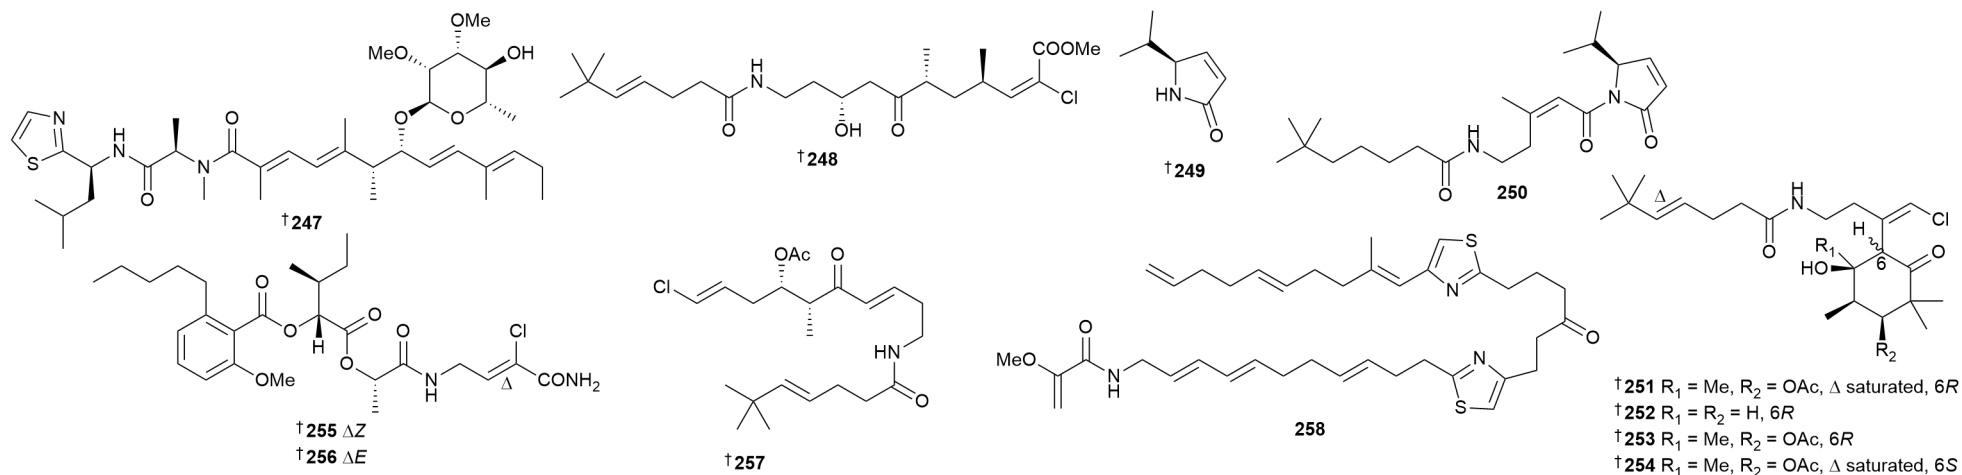

- 100** Cyanobacteria *Leptochromothrix valpauliae* // Ie island, Okinawa, Japan // Structural determination, total synthesis, and biological activity of iezoside, a highly potent Ca<sup>2+</sup>-ATPase inhibitor from the marine cyanobacterium *Leptochromothrix valpauliae*  
**247** // N // iezoside // pot. activ. vs 1 HTCL; pot. inhib. SERCA protein; total synth. achieved.
- 101** Cyanobacteria *Oscillatoria* sp. // Luquillo Beach, Puerto Rico // Luquilloamides, cytotoxic lipopeptides from a Puerto Rican collection of the filamentous marine cyanobacterium *Oscillatoria* sp.  
**248** // N // luquilloamide A // weak activ. vs 1 HTCL.  
**249** // N // luquilloamide B // IA vs 1 HTCL.  
**250** // N // luquilloamide C // IA vs 1 HTCL.  
**251** // N // luquilloamide D // IA vs 1 HTCL.  
**252** // N // luquilloamide E // weak activ. vs 1 HTCL.  
**253** // N // luquilloamide F // IA vs 1 HTCL.  
**254** // N // luquilloamide G // IA vs 1 HTCL.
- 102** Cyanobacteria *Hormoscilla* sp. // Anae Island, Guam // Discovery, synthesis, and biological evaluation of anaenamides C and D from a new marine cyanobacterium, *Hormoscilla* sp.  
**255** // N // anaenamamide C // IA vs 1 HTCL; IA vs Nrf2 activation; total synth. achieved  
**256** // N // anaenamamide D // IA vs 1 HTCL; IA vs Nrf2 activation; total synth. achieved
- 103** Cyanobacteria *Okeania* sp // Beru, Kasari-cho, Amami-shi, Kagoshima, Japan // Isolation and total synthesis of beru'amide, an antitrypanosomal polyketide from a marine cyanobacterium *Okeania* sp.  
**257** // N // beru'amide // weak activ. vs 1 HTCL; mod. activ. vs *T. b. rhodesiense*; total synth. achieved.
- 104** Cyanobacteria *Caldora* sp // Ishigaki, Okinawa, Japan // Isolation of caldorazole, a thiazole-containing polyketide with selective cytotoxicity under glucose-restricted conditions  
**258** // N // caldorazole // pot. cytotox. vs 3 HTCLs.

Key: Main article bibliography reference // Taxonomy // Location // Article title

Compound number // Status // Compound name // Biological activity and Other information

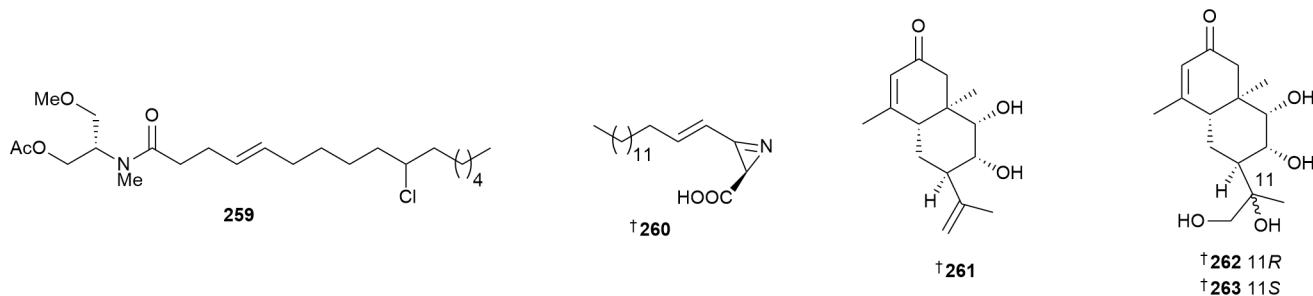

- 105** Cyanobacteria *Moorena bouillonii* // // Heterologous expression in *Anabaena* of the columbamide Pathway from the cyanobacterium *Moorena bouillonii* and production of new analogs  
**259** // N // columbamide K // IA vs neocortical neuron SCO.
- 106** Cyanobacteria *Caldora* sp. // Fort Lauderdale, Florida, USA // Anti-inflammatory dysidazirine carboxylic acid from the marine cyanobacterium *Caldora* sp. collected from the reefs of Fort Lauderdale, Florida  
**260** // N // dysidazirine carboxylic acid // IA vs 1 HTCL; IA vs NO prod.
- 107** Cyanobacteria *Scytonema* sp. // Majuro Atoll, Marshall Islands // Spirovetivane- and eudesmane-type sesquiterpenoids isolated from the culture media of two cyanobacterial strains  
**261** // N // stigolone // IA inhibition of TRPM ion channels.  
**262** // N // 11R,12-dihydroxystigolone // IA inhib. TRPM ion channels.  
**263** // N // 11S,12-dihydroxystigolone // IA inhib. TRPM ion channels.

## 2 Marine microorganisms and phytoplankton:

## 2.3 Marine-sourced fungi (excluding from mangroves)

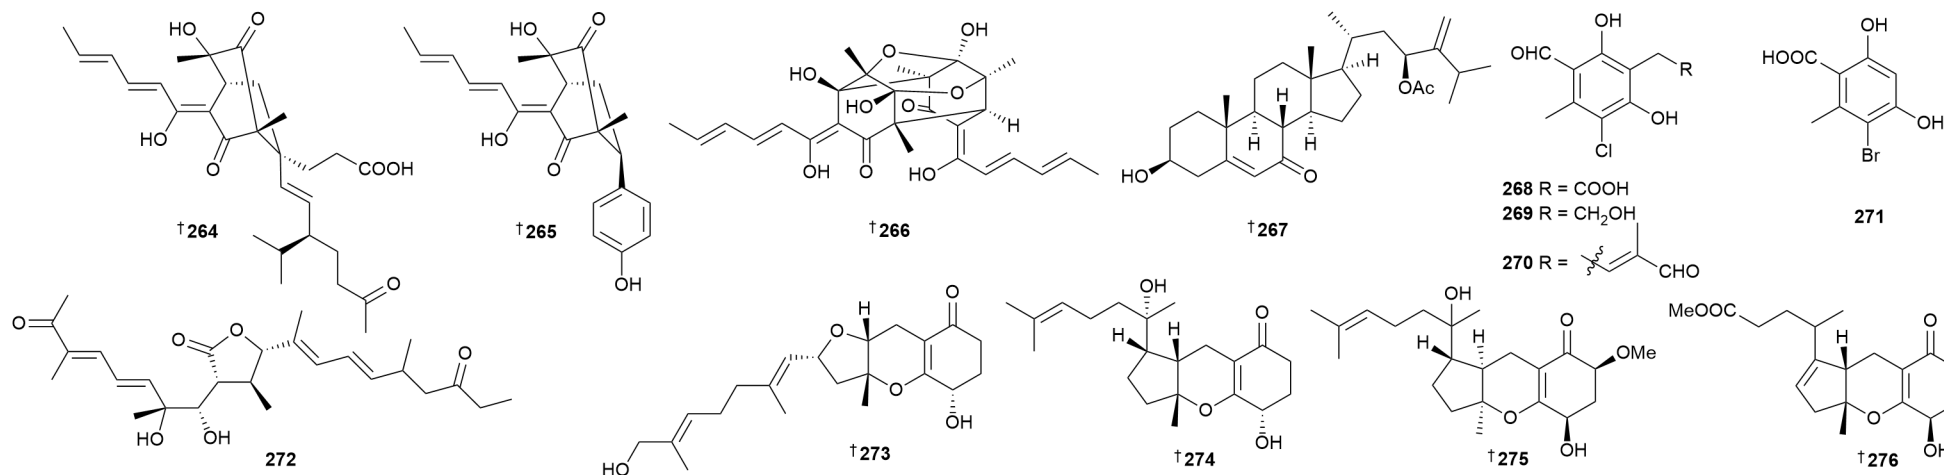

- 119** Ascomycota *Acronium chrysogenum* C10 // ATCC // Sorbicillinoid derivatives with the radical scavenging activities from the marine-derived fungus *Acronium chrysogenum* C10  
**264** // N // acresorbicillinol A // IA vs 2 bact. strains; IA vs 2 fungal strains; IA vs antioxid. (DPPH).  
**265** // N // acresorbicillinol B // IA vs 2 bact. strains; IA vs 2 fungal strains; IA vs antioxid. (DPPH).  
**266** // N // acresorbicillinol C // IA vs 2 bact. strains; IA vs 2 fungal strains; IA vs antioxid. (DPPH).
- 120** Ascomycota *Acronium* sp. // (sponge, *Ciocalypta* sp.) Paracel Islands, Hainan, China // Acremocholone, an anti-*Vibrio* steroid from the marine mesophotic zone *Ciocalypta* sponge-associated fungus *Acronium* sp. NBUF150  
**267** // N // acremocholone // mod. activ. vs 3 bact. strains.
- 121** Ascomycota *Acronium sclerotigenum* // (coral, *Pocillopora damicornis*) Beibu Gulf, China // Osteoclastogenesis inhibitory phenolic derivatives produced by the Beibu Gulf coral-associated fungus *Acronium sclerotigenum* GXIMD 02501  
**268** // N // orsaldechlorin A // IA vs NF-κB  
**269** // N // orsaldechlorin B // IA vs NF-κB  
**270** // N // orsaldechlorin C // IA vs NF-κB  
**271** // N // 5-bromo-2,4-dihydroxy-6-methylbenzoic acid // IA vs NF-κB
- 122** Ascomycota *Albifimbria verrucaria* // (sediment) Jangheungri, Incheon, Korea // Curvicolide D, a new modified γ-lactone from the culture broth of *Albifimbria verrucaria* and its antifungal activity against plant pathogenic fungi  
**272** // N // curvicolide D // IA vs 7 fungal strains.
- 123** Ascomycota *Alternaria alternata* // (unspecified sponge) Qionghai, Hainan, China // Overexpression of transcriptional regulator and tailoring enzyme leads to the discovery of anti-inflammatory meroterpenoids from marine-derived fungus *Alternaria alternata* JJY-32  
**273** // N // tricycloalternarene O // IA vs 2 HTCLs; IA vs NO prod.; IA vs PGE<sub>2</sub>.  
**274** // N // tricycloalternarene P // IA vs 2 HTCLs; IA vs NO prod.; IA vs PGE<sub>2</sub>.  
**275** // N // tricycloalternarene Q // IA vs 2 HTCLs; IA vs NO prod.; IA vs PGE<sub>2</sub>.  
**276** // N // tricycloalternarene R // IA vs 2 HTCLs; IA vs NO prod.; IA vs PGE<sub>2</sub>.

Key: Main article bibliography reference // Taxonomy // Location // Article title

Compound number // Status // Compound name // Biological activity and Other information

2 Marine microorganisms and phytoplankton:

2.3 Marine-sourced fungi (excluding from mangroves)

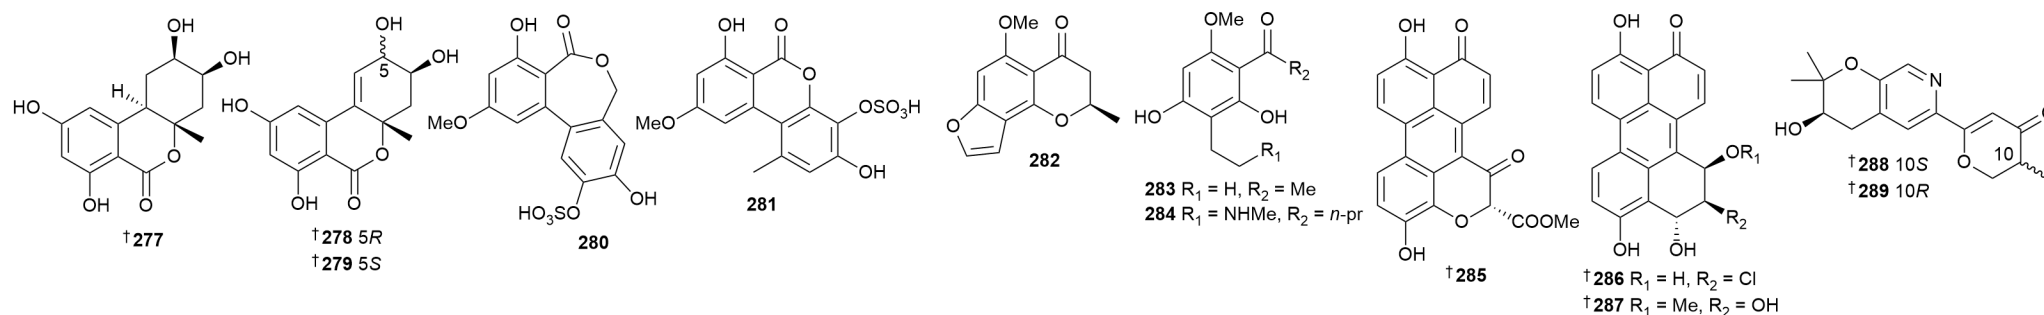

- 124** Ascomycota *Alternaria alternata* // (sediment) Southwest Indian Ridge // New dibenzo- $\alpha$ -pyrone derivatives with  $\alpha$ -glucosidase inhibitory activities from the marine-derived fungus *Alternaria alternata*  
**277** // N // alternolide A // IA vs 3 HTCLs; IA vs antioxid. (DPPH); IA inhib.  $\alpha$ -glucosidase.  
**278** // N // alternolide B // IA vs 3 HTCLs; IA vs antioxid. (DPPH); IA inhib.  $\alpha$ -glucosidase.  
**279** // N // alternolide C // IA vs 3 HTCLs; IA vs antioxid. (DPPH); IA inhib.  $\alpha$ -glucosidase.
- 125** Ascomycota *Alternaria* sp. // (sponge, *Callyspongia* sp.) Xuwen County, Guangdong Province, China // Two new sulfate-modified dibenzopyrones with anti-foodborne bacteria activity from sponge-derived fungus *Alternaria* sp. SCSIOS02F49  
**280** // N // alterlactone 5'-O-sulfate // IA to weak activ. vs 8 bact. strains.  
**281** // N // 3'-hydroxyalternariol 5-O-methyl ether-3'-O-sulfate // IA to weak activ. vs 8 bact. strains.
- 126** Ascomycota *Alternaria* sp. // (sediment) Kiribati // Three new phomalichenone derivatives from a deep-sea-derived fungus *Alternaria* sp. MCCC 3A00467  
**282** // N // phomalichenone E // IA vs 3 HTCLs.  
**283** // N // phomalichenone F // IA vs 3 HTCLs.  
**284** // N // phomalichenone G // IA vs 3 HTCLs.
- 127** Ascomycota *Alternaria* sp. // (unspecified sponge) Weddell Sea, Antarctica // Xanalterate A, altertoxin VIII and IX, perylenequinone derivatives from antarctica-sponge-derived fungus *Alternaria* sp. HDN19-690  
**285** // N // xanalterate A // IA vs 5 HTCLs; weak to mod. activ. vs 6 bact. strains.  
**286** // N // altertoxin VIII // IA vs 5 HTCLs; IA to weak activ. vs 6 bact. strains.  
**287** // N // altertoxin IX // IA vs 5 HTCLs; IA to weak activ. vs 6 bact. strains.
- 128** Ascomycota *Amphichorda felina* // (unspecified ascidian) unspecified location // Two new picoline-derived meroterpenoids with anti-acetylcholinesterase activity from ascidian-derived fungus *Amphichorda felina*  
**288** // N // amphichoterpenoid D // IA vs AChE.  
**289** // N // amphichoterpenoid E // IA vs AChE.

2 **Marine microorganisms and phytoplankton:**

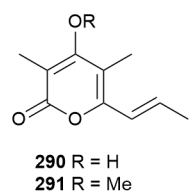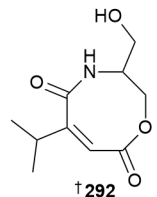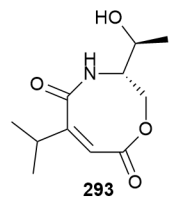

2.3 **Marine-sourced fungi (excluding from mangroves)**

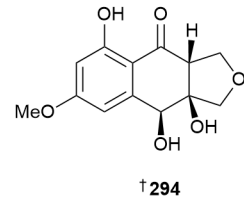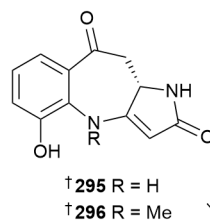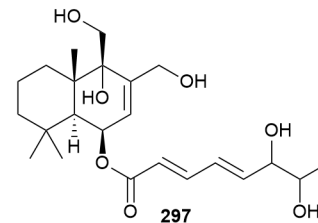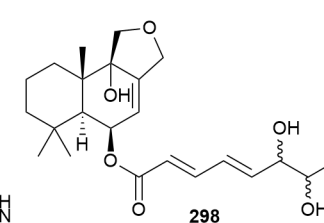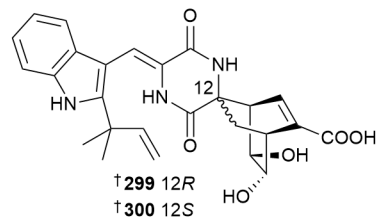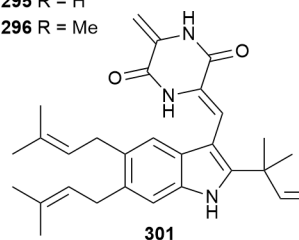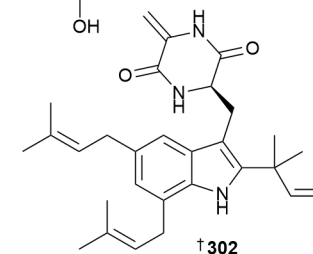

- 129** Ascomycota *Amphichorda felina*, Ascomycota *Beauveria felina* // (ascidian, *Styelaplicata* sp.) North atoll, Xisha Islands, South China Sea // Genome mining of  $\alpha$ -pyrone natural products from ascidian-derived fungus *Amphichordafelina* SYSU-MS7908  
**290** // N // amphichopyrone A // IA vs NO prod.  
**291** // N // amphichopyrone B // weak inhib. NO prod.
- 130** Ascomycota *Arthrimum* sp // (unspecified sponge) Weizhou Island, Guangxi, China // New carboxamides and a new polyketide from the sponge-derived fungus *Arthrimum* sp. SCSIO 41421  
**292** // N // ( $\pm$ )-vochysiamide C // IA vs 5 bact. strains; IA inhib. AChE.  
**293** // N // (+)-vochysiamide B // IA vs 5 bact. strains; IA inhib. AChE.  
**294** // N // 4S,3aS,9aR-3a,9a-deoxy-3a hydroxy-1-dehydroxyarthrinone // IA vs 5 bact. strains; IA vs inhib. AChE.
- 131** Ascomycota *Aspergillus candidus* // (gorgonian, *Juncella fragilis*) Nansha Islands, South China Sea // Discovery, total syntheses and potent anti-inflammatory activity of pyrrolinone-fused benzoazepine alkaloids asperazepanones A and B from *Aspergillus candidus*  
**295** // N // (+)-asperazepanone A // IA vs NO prod.; NT inhib. TNF- $\alpha$ ; NT inhib. IL6.  
**296** // N // (+)-asperazepanone B // mod. inhib. NO prod.; pot. inhib. TNF- momoacylglycerol cyclase; pot. inhib. IL6.
- 132** Ascomycota *Beauveria felina*, Ascomycota *Aspergillus* sp // (brown alga, *Laminaria sachalinensis*) Kunashir Island, (sediment) Van Phong Bay, South China Sea, Vietnam // Cytotoxic drimane-type sesquiterpenes from co-culture of the marine-derived fungi *Aspergillus carneus* KMM 4638 and *Beauveria felina* (= *Isaria felina*) KMM 4639  
**297** // N // asperflavinoid A/B // IA vs 3 HTCLs; IA vs 1 MTCL; IA vs 1 nMCL.  
**298** // N // asperflavinoid D/E // IA vs 3 HTCLs; IA vs 1 MTCL; IA vs 1 nMCL.
- 133** Ascomycota *Aspergillus chevalieri* // (sediment) South China Sea // Chevalinulins A and B, proangiogenic alkaloids with a spiro[bicyclo[2.2.2]octane-diketopiperazine] skeleton from deep-sea cold-seep-derived fungus *Aspergillus chevalieri* CS-122  
**299** // N // chevalinulin A // No proangiogenic activ. (zebrafish).  
**300** // N // chevalinulin B // No proangiogenic activ. (zebrafish).
- 134** Ascomycota *Aspergillus chevalieri* // (unspecified "deep-sea" source) unspecified location // Indole diketopiperazine alkaloids isolated from the marine-derived fungus *Aspergillus chevalieri* MCCC M23426  
**301** // N // 5-prenylcryptoechinulin A // IA vs 1 HTCL; IA vs 4 bact. strains.  
**302** // N // 9-*epi*-didehydroechinulin // IA vs 1 HTCL; IA vs 4 bact. strains.

**Key:** Main article bibliography reference // Taxonomy // Location // Article title

Compound number // Status // Compound name // Biological activity and Other information

2 **Marine microorganisms and phytoplankton:** 2.3 **Marine-sourced fungi (excluding from mangroves)**

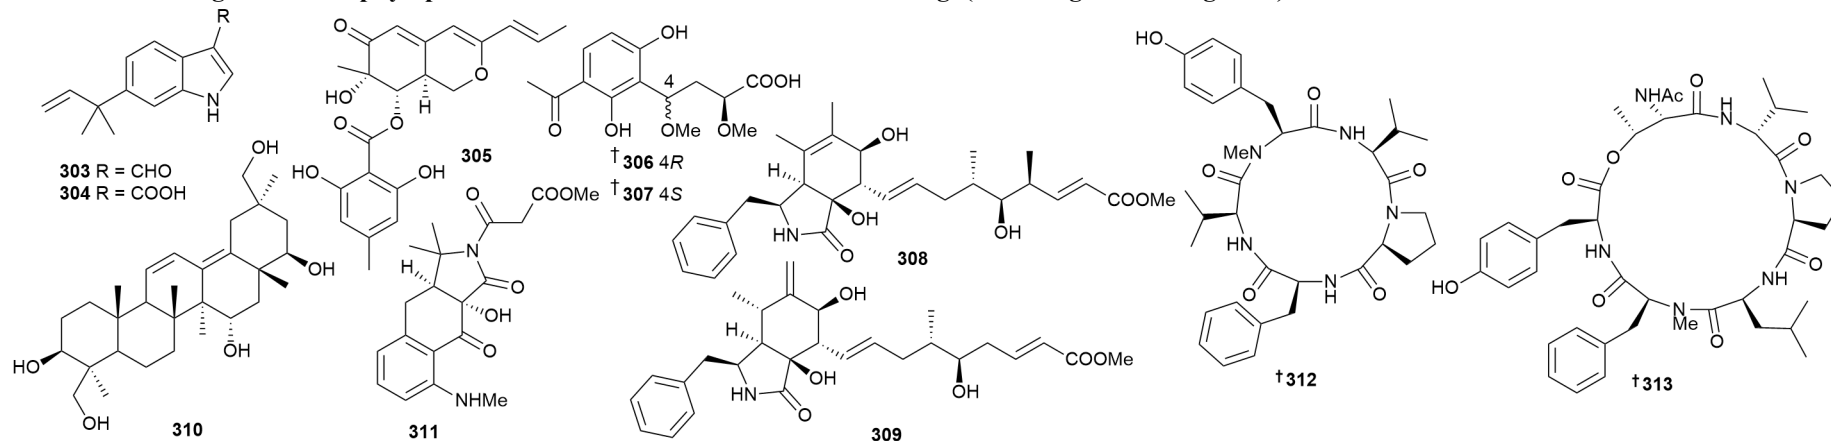

- 135** Ascomycota *Aspergillus flavipes* // (seawater) Mariana Trench, Western Pacific // Cytotoxic indole alkaloids and polyketides produced by a marine-derived fungus *Aspergillus flavipes* DS720  
**303** // N // flavonoid A // IA to weak cytotox. vs 20 HTCLs.  
**304** // N // flavonoid B // NT.  
**305** // N // flaviazaphilone A // NT.
- 136** Ascomycota *Aspergillus fischeri* // (sediment) Indian Ocean // Cytotoxic polyketides from the deep-sea-derived fungus *Aspergillus fischeri* FS452  
**306** // N // fischerin A // weak cytotox. vs 4 HTCLs.  
**307** // N // fischerin B // IA vs 4 HTCLs.
- 137** Ascomycota *Aspergillus flavipes* // (sediment) Bohai Bay, Dongying, Shandong Province, China // Cytochalasins from coastal saline soil-derived fungus *Aspergillus flavipes* RD-13 and their cytotoxicities  
**308** // N // methyl (2*E*,4*S*,5*S*,6*S*,8*E*)-9-((1*S*,3*aS*,4*S*,5*S*,7*aR*)-1-benzyl-3*a*,5-dihydroxy-6,7-dimethyl-3-oxo-2,3,3*a*,4,5,7*a*-hexahydro-1*H*-isoindol-4-yl)-5-hydroxy-4,6-dimethylnona-2,8-dienoate // IA vs 3 HTCLs.  
**309** // N // methyl (2*E*,4*S*,5*S*,6*S*,8*E*)-9-((1*S*,3*aS*,4*S*,5*S*,7*S*,7*aR*)-1-benzyl-3*a*,5-dihydroxy-7-methyl-6-methylene-3-oxooctahydro-1*H*-isoindol-4-yl)-5-hydroxy-4,6-dimethylnona-2,8-dienoate // IA vs 3 HTCLs.
- 138** Ascomycota *Aspergillus flavus* // (jellyfish, *Aurelia aurita*) unspecified location // A new fungal triterpene from the fungus *Aspergillus flavus* stimulates glucose uptake without fat accumulation  
**310** // N // asperflagin // IA vs 1 nMCL; weak partial agonist of Peroxisome Proliferator-Activated Receptor- $\gamma$  (PPAR- $\gamma$ )
- 139** Ascomycota *Aspergillus flavus* // (coral, *Porites lutea*) Weizhou Island, Guangxi Zhuang, China // A new  $\alpha$ -cyclopiazonic acid alkaloid identified from the Weizhou Island coral-derived fungus *Aspergillus flavus* GXIMD 02503  
**311** // N // asperorydine Q // IA vs NF- $\kappa$ B
- 140** Ascomycota *Aspergillus flocculosus* // (sponge, *Phakellia fusca*) Yongxing Island, China // Asperflomide and asperflosamide, new *N*-methylated cyclopeptides from the marine sponge-derived fungus *Aspergillus flocculosus* 16D-1  
**312** // N // asperflomide // IA vs 6 HTCLs; IA vs 2 nHCLs; IA vs 3 bact. strains; IA vs 1 fungus; IA vs inhib. tankyrase 1/2.  
**313** // N // asperflosamide // IA vs 6 HTCLs; IA vs 2 nHCLs; IA vs 3 bact. strains; IA vs 1 fungus; IA vs inhib. tankyrase 1/2.

**Key:** Main article bibliography reference // Taxonomy // Location // Article title

Compound number // Status // Compound name // Biological activity and Other information

2 Marine microorganisms and phytoplankton: 2.3 Marine-sourced fungi (excluding from mangroves)

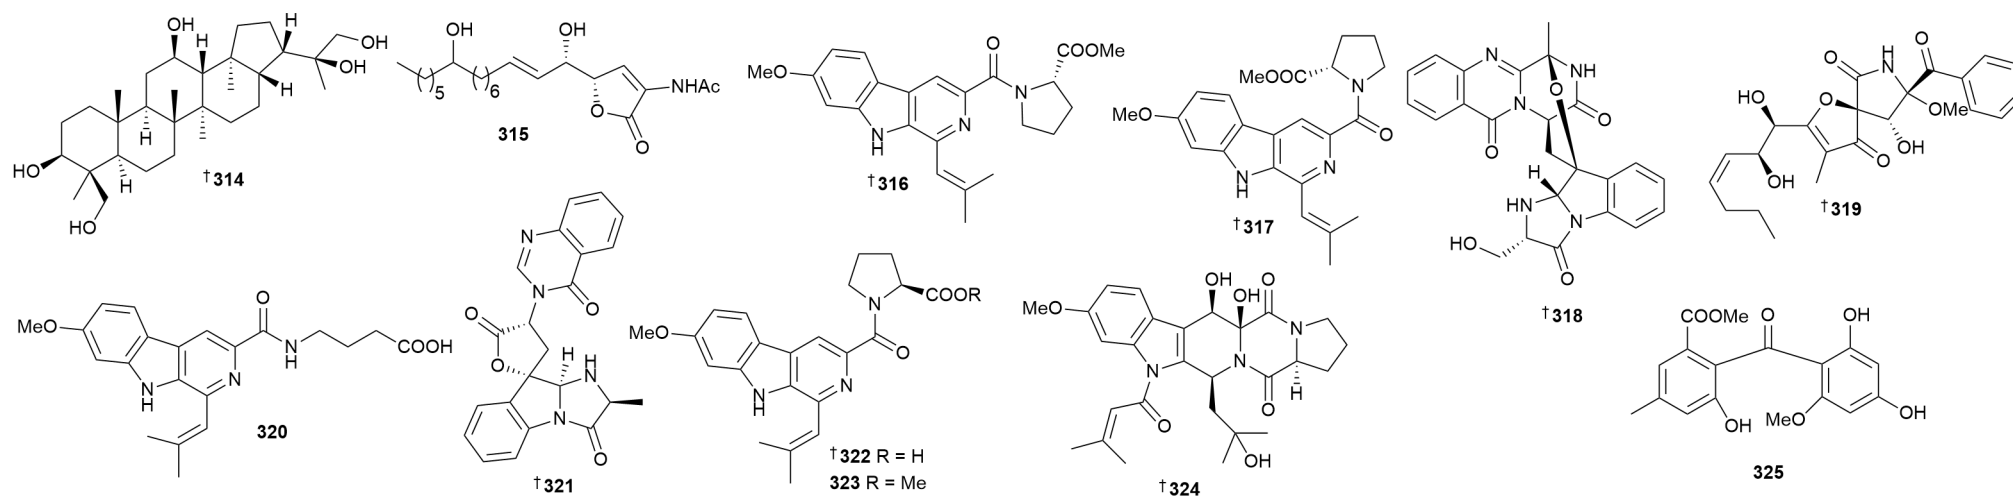

- 141** Ascomycota *Aspergillus fumigatus* // (sediment) East China Sea // Six new antimicrobial metabolites from the deep-sea sediment-derived fungus *Aspergillus fumigatus* SD-406  
**314** // N // 1,4,23-trihydroxy-hopane-22,30-diol // IA to weak activ. vs 3 bact. strains; IA to weak activ. vs 2 fungi.  
**315** // N // sphingofungin I // mod. activ. vs 3 bact. strains; IA vs 2 fungi.  
**316** // N // secofumitremorgin A // IA to weak activ. vs 3 bact. strains; IA to mod. activ. vs 2 fungi. (As a mixture with **317**)  
**317** // N // secofumitremorgin B // IA to weak activ. vs 3 bact. strains; IA to mod. activ. vs 2 fungi. (As a mixture with **316**)  
**318** // N // 29-hydroxyfumiquinazoline C // IA vs 3 bact. strains; IA vs 2 fungi.  
**319** // N // 10R-15-methylpseurotin A // IA vs 3 bact. strains; IA to mod. activ. vs 2 fungi.
- 142** Ascomycota *Aspergillus fumigatus* // (seawater) Western Pacific // Discovery of anti-MRSA secondary metabolites from a marine-derived fungus *Aspergillus fumigatus*  
**320** // N // fumindoline A // IA vs 4 bact. strains; IA vs 1 fungus.  
**321** // N // 2-epi-tryptoquivaline F // IA vs 4 bact. strains; IA vs 1 fungus.  
**322** // N // fumindoline B // IA vs 4 bact. strains; IA vs 1 fungus.  
**323** // N // fumindoline C // IA vs 4 bact. strains; IA vs 1 fungus.  
**324** // N // 12β,13β-hydroxy-asperfumigatin // IA vs 4 bact. strains; IA vs 1 fungus.  
**325** // N // penibenzophenone E // IA vs 4 bact. strains; IA vs 1 fungus.

Key: Main article bibliography reference // Taxonomy // Location // Article title

Compound number // Status // Compound name // Biological activity and Other information

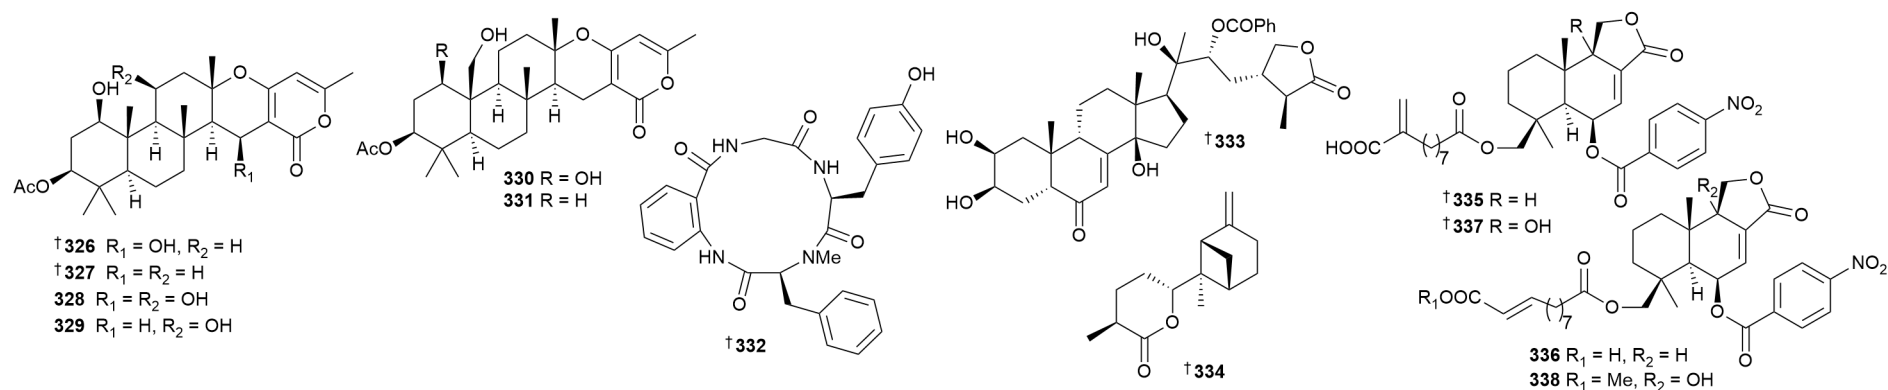

- 143** Ascomycota *Aspergillus hiratsukae* // (unspecified gorgonian) Mischief Reef, South China Sea // Chevalones H–M: six new  $\alpha$ -pyrone meroterpenoids from the gorgonian coral-derived fungus *Aspergillus hiratsukae* SCSIO 7S2001  
 326 // N // chevalone H // IA vs 4 HTCLs; IA to weak activ. vs 4 bact. strains.  
 327 // N // chevalone I // IA vs 4 HTCLs; IA to weak activ. vs 4 bact. strains.  
 328 // N // chevalone J // IA vs 4 HTCLs; IA to weak activ. vs 4 bact. strains.  
 329 // N // chevalone K // IA vs 4 HTCLs; IA to weak activ. vs 4 bact. strains.  
 330 // N // chevalone L // IA vs 4 HTCLs; IA to weak activ. vs 4 bact. strains.  
 331 // N // chevalone M // IA vs 4 HTCLs; IA vs 4 bact. strains.
- 144** Ascomycota *Aspergillus hiratsukae* // (unspecified soft coral) South China Sea // Diverse secondary metabolites from the coral-derived fungus *Aspergillus hiratsukae* SCSIO 5Bn1003  
 332 // N // asperhiratide // IA vs 4 HTCLs; IA vs 2 bact. strains, IA vs antioxid. (DPPH), IA vs  $\alpha$ -glucosidase; weak antiangiogenic activ. (zebrafish).  
 333 // N // asperhiratine // IA vs 4 HTCLs; IA vs 2 bact. strains, IA vs antioxid. (DPPH), IA vs  $\alpha$ -glucosidase.  
 334 // N // asperhiratone // IA vs 4 HTCLs; IA vs 2 bact. strains, IA vs antioxid. (DPPH), IA vs  $\alpha$ -glucosidase.
- 145** Ascomycota *Aspergillus insulicola* // (unidentified sponge) Prydz Bay, Antarctica // Cytotoxic nitrobenzoyl sesquiterpenoids from an Antarctica sponge-derived *Aspergillus insulicola*  
 335 // N // insulicolide D // IA vs 3 HTCLs.  
 336 // N // insulicolide E // IA vs 3 HTCLs.  
 337 // N // insulicolide F // IA to weak cytotox. vs 9 HTCLs.  
 338 // N // insulicolide G // IA to weak cytotox. vs 3 HTCLs.



2 Marine microorganisms and phytoplankton: 2.3 Marine-sourced fungi (excluding from mangroves)

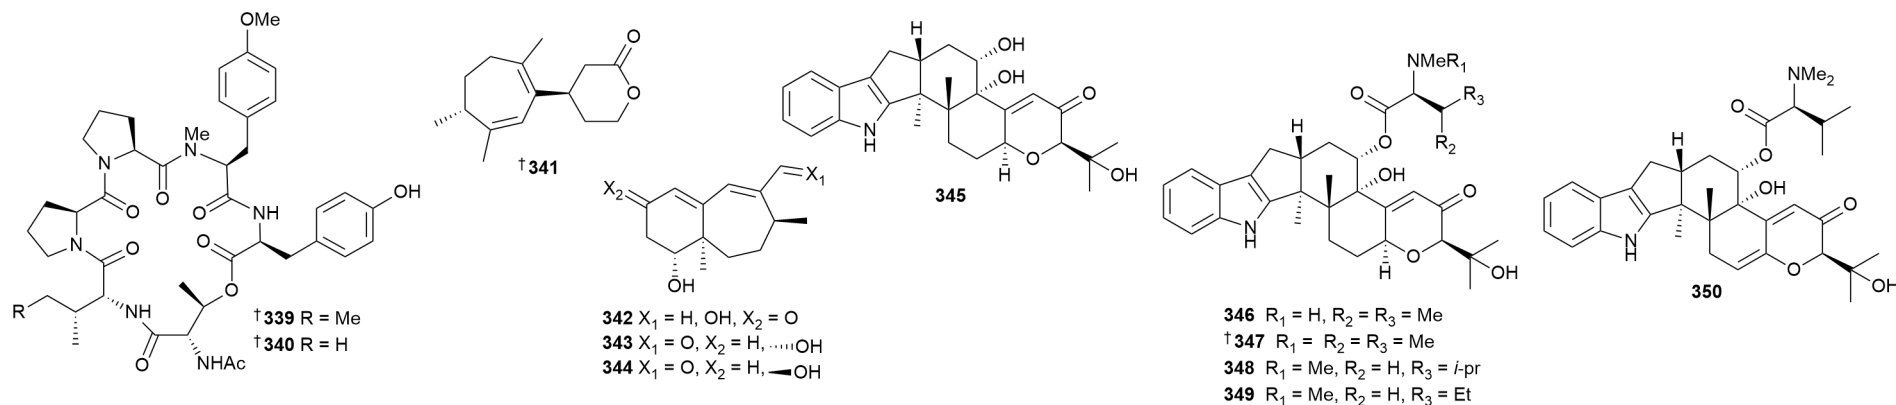

- 146 Ascomycota *Aspergillus japonicus* // (unspecified sponge) Arctic 6700-4 sea area // Japonamides A and B, two new cyclohexadepsipeptides from the marine-sponge-derived fungus *Aspergillus japonicus* and their synergistic antifungal activities  
 339 // N // japonamide A // IA vs 2 HTCLs; IA vs 2 MTCLs; IA vs 1 fungal strain; pot. synergistic effect with antifungal agents rapamycin, fluconazole, ketoconazole.  
 340 // N // japonamide B // IA vs 2 HTCLs; IA vs 2 MTCLs; IA vs 1 fungal strain; pot. synergistic effect with antifungal agents rapamycin, fluconazole, ketoconazole.
- 147 Ascomycota *Aspergillus niger* // (sponge, *Dysidea* sp.) Xisha Islands, South China Sea // Nigerin and ochracenes J–L, new sesquiterpenoids from the marine sponge symbiotic fungus *Aspergillus niger*  
 341 // N // nigerin // IA vs 3 HTCLs; weak inhib. NO prod.  
 342 // N // ochracene J // IA vs 3 HTCLs; weak inhib. NO prod.  
 343 // N // ochracene K // IA vs 3 HTCLs; IA vs NO prod.  
 344 // N // ochracene L // IA vs 3 HTCLs; IA vs NO prod.
- 148 Ascomycota *Aspergillus noonimiae* // (sediment) Perth, Western Australia // Noonindoles A–F: rare indole diterpene amino acid conjugates from a marine-derived fungus, *Aspergillus noonimiae* CMB-M0339  
 345 // N // noonindole F // IA vs 2 HTCLs; IA vs 3 bact. strains; IA vs 1 fungus.  
 346 // N // noonindole B // IA vs 2 HTCLs; IA vs 3 bact. strains; IA vs 1 fungus.  
 347 // N // noonindole A // IA vs 2 HTCLs; IA vs 3 bact. strains; weak activ. vs 1 fungus.  
 348 // N // noonindole C // IA vs 2 HTCLs; IA vs 3 bact. strains; IA vs 1 fungus.  
 349 // N // noonindole D // IA vs 2 HTCLs; IA vs 3 bact. strains; IA vs 1 fungus.  
 350 // N // noonindole E // IA vs 2 HTCLs; IA vs 3 bact. strains; IA vs 1 fungus.
- 149 Ascomycota *Aspergillus ochraceopetaliformis* // (red alga, *Hypnea pannosa*) Luhuitou, Sanya city, Hainan province, China // Anti-inflammatory polyketides from an alga-derived fungus *Aspergillus ochraceopetaliformis* SCSIO 41020  
 351 // N // aspormisin A // IA vs NO prod.

Key: Main article bibliography reference // Taxonomy // Location // Article title

Compound number // Status // Compound name // Biological activity and Other information

2 Marine microorganisms and phytoplankton:

2.3 Marine-sourced fungi (excluding from mangroves)

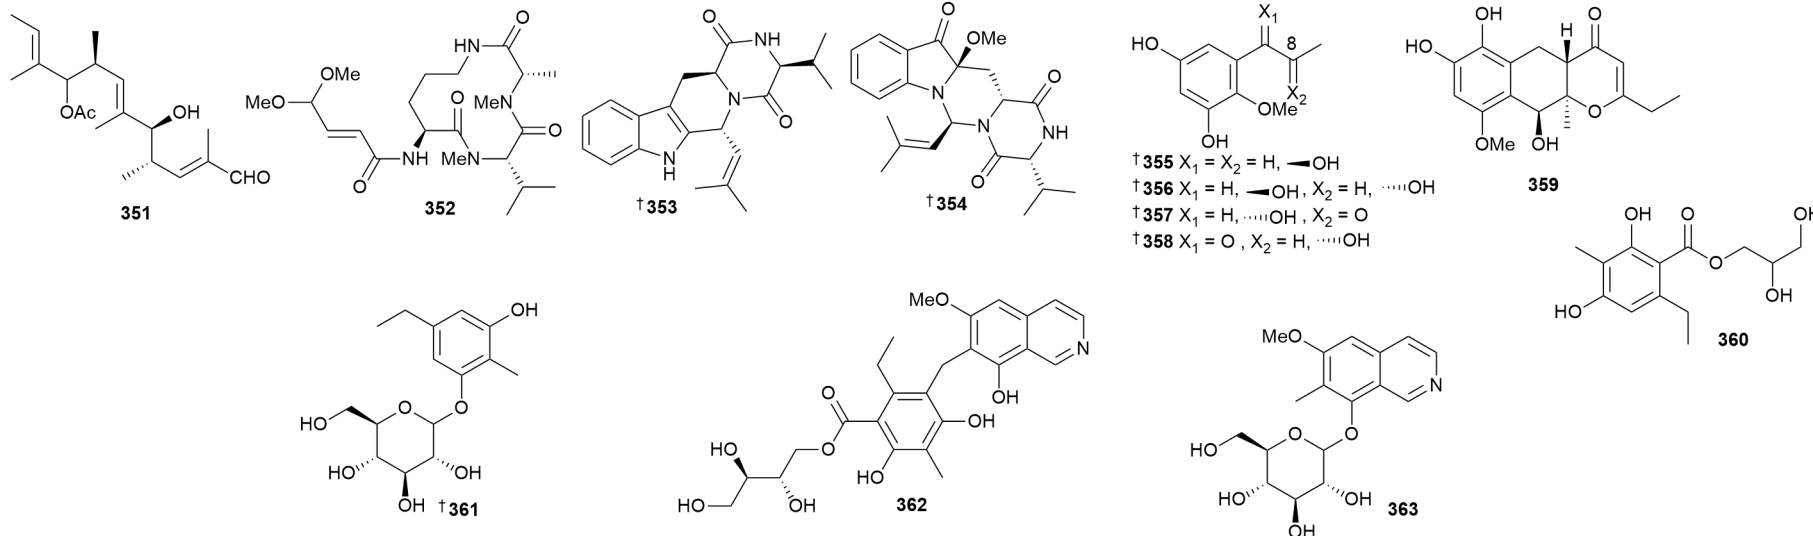

- 150** Ascomycota *Aspergillus ochraceopetaliformis* // (seawater) Dongshan Island, Fujian Province, China // Structure elucidation of a novel cyclic tripeptide from the marine-derived fungus *Aspergillus ochraceopetaliformis* DSW-2  
**352** // N // sclerotiotide M // IA vs 2 HTCLs.
- 151** Ascomycota *Aspergillus ochraceus*(co-cultured with terrestrial *Penicillium* sp.) // (seawater) Pacific Ocean // Novel prenylated indole alkaloids with neuroprotection on SH-SY5Y cells against oxidative stress targeting Keap1–Nrf2  
**353** // N // asperpenazine // IA vs 1 HTCL; No cytoprotection against H<sub>2</sub>O<sub>2</sub> induced damage.  
**354** // N // asperpendoline // IA vs 1 HTCL; weak cytoprotective effect against H<sub>2</sub>O<sub>2</sub> induced damage.
- 152** Ascomycota *Aspergillus puniceus* // (sediment) Pacific Ocean // Phenolic metabolites from a deep-sea-derived fungus *Aspergillus puniceus* A2 and their Nrf2-dependent anti-inflammatory effects  
**355** // N // asperpropanol A // IA vs NO prod.  
**356** // N // asperpropanol B // IA vs NO prod.  
**357** // N // asperpropanol C // IA vs NO prod.  
**358** // N // asperpropanol D // IA vs NO prod.
- 153** Ascomycota *Aspergillus puniceus* // (sediment) Okinawa Trough // Five new aromatic polyketides and isoquinoline alkaloids from the deep-sea-derived fungus *Aspergillus puniceus* SCSIO z021  
**359** // N // (±)-puniceusone A // IA vs 4 bact. strains.  
**360** // N // (±)-2,3-dihydroxypropyl 6-ethyl-2,4-dihydroxy-3-methylbenzoate // IA vs 4 bact. strains.  
**361** // N // (5-ethyl-3-hydroxy-2-methyl) phenyl-β-D-glucoside // IA vs 4 bact. strains.  
**362** // N // (±)-puniceusine P // IA vs 4 bact. strains.  
**363** // N // puniceusine O // IA vs 4 bact. strains.

Key: Main article bibliography reference // Taxonomy // Location // Article title

Compound number // Status // Compound name // Biological activity and Other information

2 Marine microorganisms and phytoplankton: 2.3 Marine-sourced fungi (excluding from mangroves)

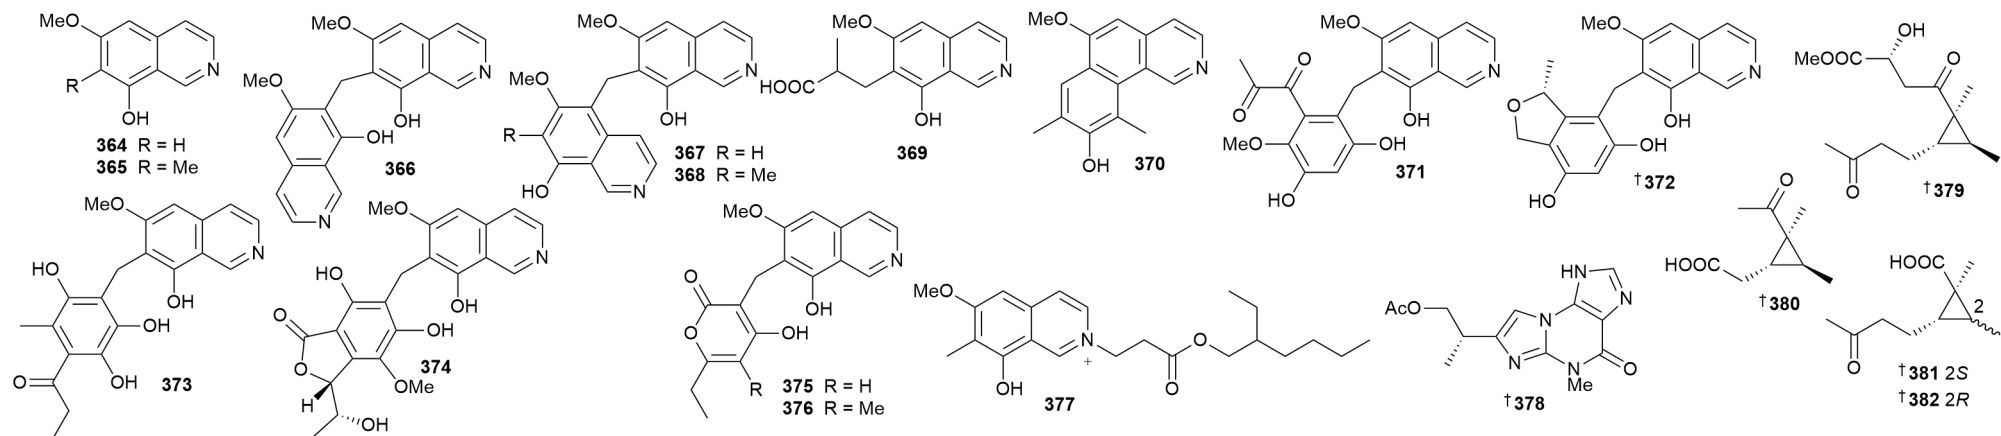

154 Ascomycota *Aspergillus puniceus* // (sediment) Okinawa Trough // Isoquinoline alkaloids as protein tyrosine phosphatase inhibitors from a deep-sea-derived fungus *Aspergillus puniceus*

- 364 // N // puniceusine A // IA vs 1 HTCL; IA vs 3 bact. strains; IA vs 5 PTPs.  
 365 // N // puniceusine B // IA vs 1 HTCL; IA vs 3 bact. strains; IA vs 5 PTPs.  
 366 // N // puniceusine C // IA vs 1 HTCL; IA vs 3 bact. strains; IA to weak inhib. vs 5 PTPs.  
 367 // N // puniceusine D // IA vs 1 HTCL; IA vs 3 bact. strains; IA to weak inhib. vs 5 PTPs.  
 368 // N // puniceusine E // IA vs 1 HTCL; IA vs 3 bact. strains; IA vs 5 PTPs.  
 369 // N // puniceusine F // IA vs 1 HTCL; IA vs 3 bact. strains; IA vs 5 PTPs.  
 370 // N // puniceusine G // IA vs 1 HTCL; IA vs 3 bact. strains; IA vs 5 PTPs.  
 371 // N // puniceusine H // IA vs 1 HTCL; IA vs 3 bact. strains; IA vs 5 PTPs.  
 372 // N // puniceusine I // IA vs 1 HTCL; IA vs 3 bact. strains; IA vs 5 PTPs.  
 373 // N // puniceusine J // IA vs 1 HTCL; IA vs 3 bact. strains; IA vs 5 PTPs.  
 374 // N // puniceusine K // IA vs 1 HTCL; IA vs 3 bact. strains; IA vs 5 PTPs.  
 375 // N // puniceusine L // IA vs 1 HTCL; IA vs 3 bact. strains; IA vs 5 PTPs.  
 376 // N // puniceusine M // IA vs 1 HTCL; IA vs 3 bact. strains; IA vs 5 PTPs.  
 377 // N // puniceusine N // IA vs 1 HTCL; IA vs 3 bact. strains; IA vs 5 PTPs.

155 Ascomycota *Aspergillus sydowii* // (sediment) South Atlantic Ocean // Acremolin D, a new acremolin alkaloid from the deep-sea sediment derived *Aspergillus sydowii* fungus

- 378 // N // acremolin D // IA vs 6 HTCLs.

156 Ascomycota *Aspergillus sydowii* // (sediment) South Atlantic Ocean // Antiviral cyclopropane acids from deep-sea-derived fungus *Aspergillus sydowii*

- 379 // N // sydocyclopropane A // IA vs 1 fungus.  
 380 // N // sydocyclopropane B // IA vs 1 fungus.  
 381 // N // sydocyclopropane C // IA vs 1 fungus.  
 382 // N // sydocyclopropane D // IA vs 1 fungus.

Key: Main article bibliography reference // Taxonomy // Location // Article title

Compound number // Status // Compound name // Biological activity and Other information

2 Marine microorganisms and phytoplankton: 2.3 Marine-sourced fungi (excluding from mangroves)

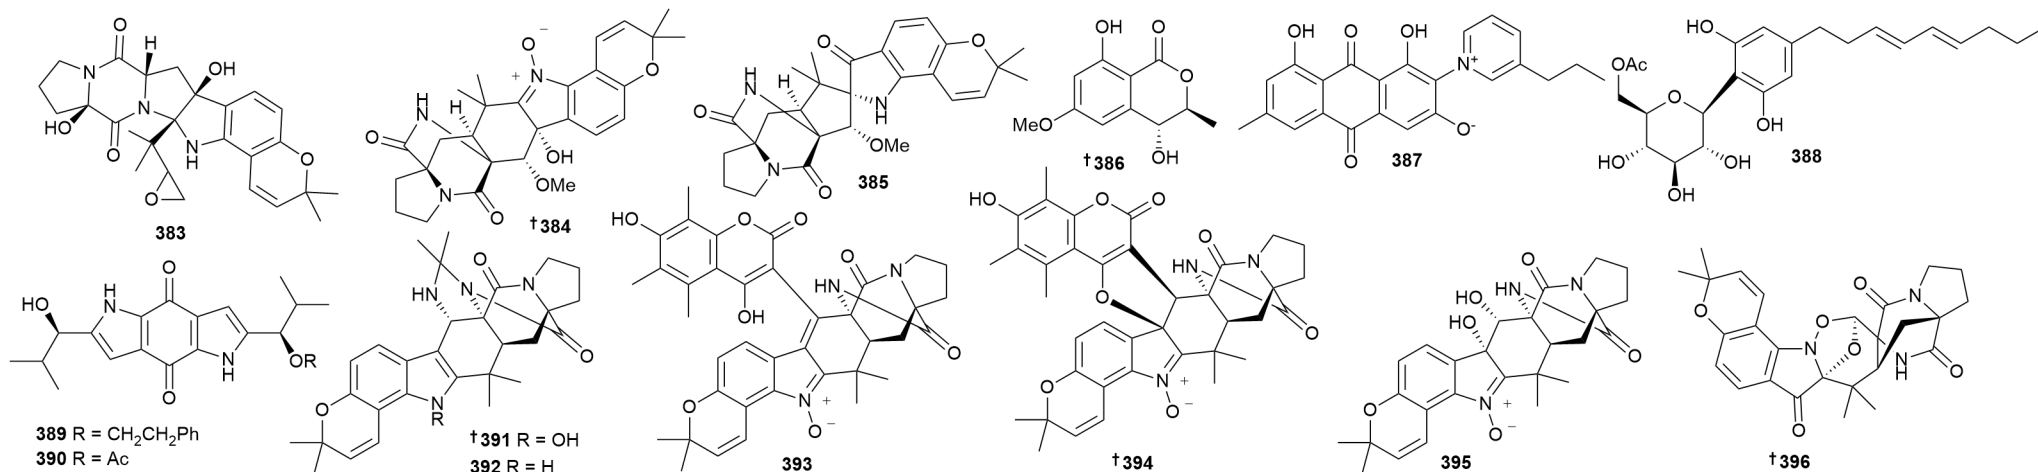

- 157** Ascomycota *Aspergillus sclerotiorum* // (unidentified sponge) South China Sea // 2,5-Diketopiperazines from a sponge-derived fungus *Aspergillus sclerotiorum*  
**383** // N // speramide C // IA vs 3 HTCLs; IA vs 1 nHCL; IA vs 3 bact. strains; IA vs inhib. AChE; IA vs inhib. Topo I.  
**384** // N // 3,21-*epi*-taichunamide F // IA vs 3 HTCLs; IA vs 1 nHCL; IA vs 3 bact. strains; IA vs inhib. AChE; IA vs inhib. Topo I.  
**385** // N // 2-*epi*-amoenamide C // IA vs 3 HTCLs; IA vs 1 nHCL; IA vs 3 bact. strains; IA vs inhib. AChE; IA vs inhib. Topo I.
- 158** Ascomycota *Aspergillus stellatus* // (sponge, *Mycale* sp.) Samaesan Island, Gulf of Thailand, Chonburi province, Thailand // New alkylpyridinium anthraquinone, isocoumarin, glucosyl resorcinol derivative and prenylated pyranoxanthenes from the culture of a marine sponge-associated fungus, *Aspergillus stellatus* KUFA 2017  
**386** // N // (3*S*,4*R*)-4-hydroxy-6-methoxymellein // IA vs 7 bact. strains.  
**387** // N // stellatanthraquinone // IA vs 7 bact. strains.  
**388** // N // acetyl carnemycin E // IA vs 7 bact. strains.
- 159** Ascomycota *Aspergillus tamarii* // (sponge) Vizhinjam, India // Targeted isolation of two new anti-inflammatory and UV-A protective dipyrroloquinones from the sponge-associated fungus *Aspergillus tamarii* MCCF102  
**389** // N // terreusinone B // mod. inhib. NO prod.  
**390** // N // terreusinone C // mod. inhib. NO prod.
- 160** Ascomycota *Aspergillus sclerotiorum* // (unspecified gorgonian) South China Sea // Sclerotiamides C–H, notoamides from a marine gorgonian-derived fungus with cytotoxic activities  
**391** // N // sclerotiamide C // weak cytotox. vs 4 HTCLs.  
**392** // N // sclerotiamide D // IA vs 4 HTCLs.  
**393** // N // sclerotiamide E // IA vs 4 HTCLs.  
**394** // N // sclerotiamide F // weak cytotox. vs 4 HTCLs.  
**395** // N // sclerotiamide G // IA vs 4 HTCLs.  
**396** // N // sclerotiamide H // IA vs 4 HTCLs.

2 Marine microorganisms and phytoplankton: 2.3 Marine-sourced fungi (excluding from mangroves)

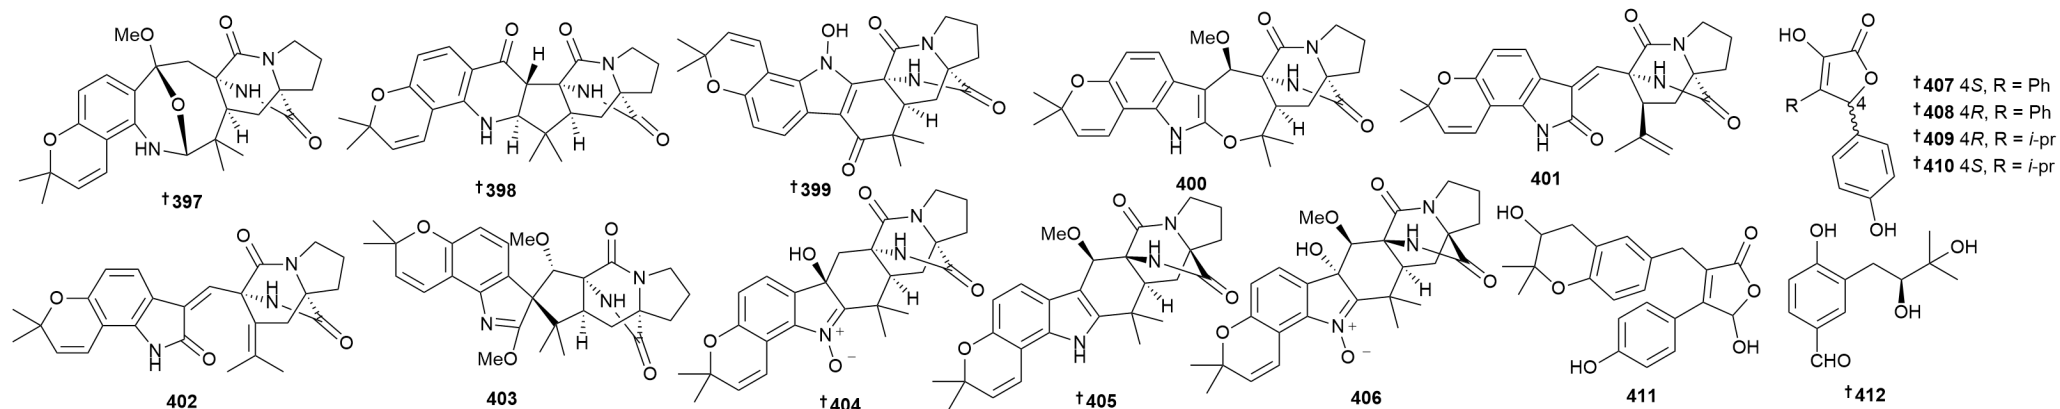

- 161** Ascomycota *Aspergillus sclerotiorum* // (unspecified gorgonian) South China Sea // Prenylated notoamide-type alkaloids isolated from the fungus *Aspergillus sclerotiorum* and their inhibition of NLRP3 inflammasome activation and antibacterial activities
- 397** // N // sclerotiamide I // mod. activ. vs 1 bact. strain; IA vs inhib. LDH; IA vs inhib. IL-1 $\beta$ .  
**398** // N // sclerotiamide J // mod. activ. vs 3 bact. strains; weak inhib. vs LDH; weak inhib. vs IL-1 $\beta$ .  
**399** // N // sclerotiamide K // weak activ. vs 1 bact. strain; IA vs inhib. LDH; IA vs inhib. IL-1 $\beta$ .  
**400** // N // sclerotiamide L // mod. activ. vs 1 bact. strain; IA vs inhib. LDH; IA vs inhib. IL-1 $\beta$ .  
**401** // N // sclerotiamide M // weak activ. vs 1 bact. strain; IA vs inhib. LDH; IA vs inhib. IL-1 $\beta$ .  
**402** // N // sclerotiamide N // weak activ. vs 1 bact. strain; IA vs inhib. LDH; IA vs inhib. IL-1 $\beta$ .  
**403** // N // sclerotiamide O // weak activ. vs 1 bact. strain; weak inhib. vs LDH; weak inhib. vs IL-1 $\beta$ .  
**404** // N // sclerotiamide P // weak activ. vs 1 bact. strain; weak inhib. vs LDH; weak inhib. vs IL-1 $\beta$ .  
**405** // N // sclerotiamide Q // weak activ. vs 1 bact. strain; weak inhib. vs LDH; weak inhib. vs IL-1 $\beta$ .  
**406** // N // sclerotiamide R // weak activ. vs 1 bact. strain; IA vs inhib. LDH; IA vs IL-1 $\beta$ .
- 162** Ascomycota *Aspergillus* sp // (soft coral, *Simularia* sp.) Sanya Bay, Hainan, China // Butenolides from the coral-derived fungus *Aspergillus terreus* SCSIO41404
- 407** // N // (+)-asperteretal G // IA vs 2 HTCLs; IA vs 2 bact. strains; IA vs PL; IA vs AChE.  
**408** // N // (-)-asperteretal G // IA vs 2 HTCLs; IA vs 2 bact. strains; IA vs PL; IA vs AChE.  
**409** // N // (+)-asperteretal H // IA vs 2 HTCLs; IA vs 2 bact. strains; IA vs PL; IA vs AChE.  
**410** // N // (-)-asperteretal H // IA vs 2 HTCLs; IA vs 2 bact. strains; IA vs PL; IA vs AChE.  
**411** // N // asperteretal I // IA vs 2 HTCLs; IA vs 2 bact. strains; IA vs PL; IA vs AChE.  
**412** // N // (S)-3-(2,3-dihydroxy-3-methylbutyl)-4-hydroxybenzaldehyde // IA vs 2 HTCLs; NT vs PL, AChE or 2 bact. strains.

2 Marine microorganisms and phytoplankton:

2.3 Marine-sourced fungi (excluding from mangroves)

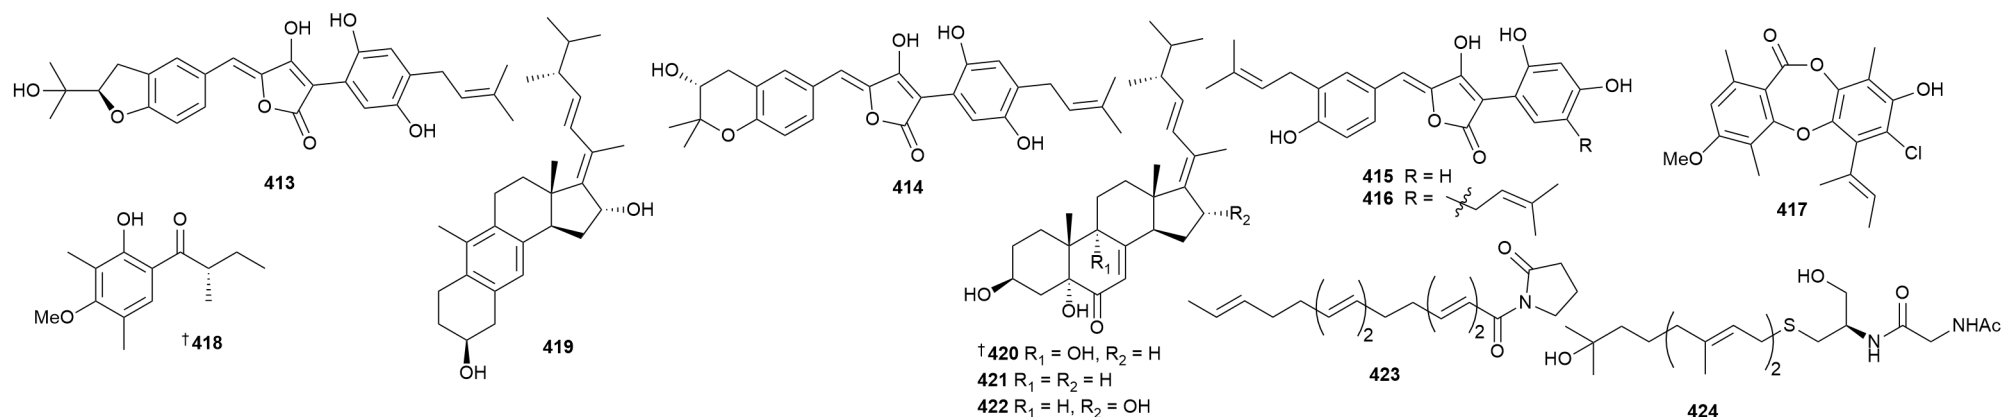

- 163** Ascomycota *Aspergillus terreus* // (green alga, *Ulva lactuca*) Northeast coast of Taiwan // Bioactive pulvinones from a marine algicolous fungus *Aspergillus terreus* NTU243  
**413** // N // aspulvinone S // IA vs NO prod.; IA vs matrix metalloproteinase 9.  
**414** // N // aspulvinone T // IA vs NO prod.; IA vs matrix metalloproteinase 9.  
**415** // N // aspulvinone U // IA vs NO prod.; IA vs matrix metalloproteinase 9.  
**416** // N // aspulvinone V // weak inhib. NO prod.; weak inhib. matrix metalloproteinase 9.
- 164** Ascomycota *Aspergillus unguis* // (coral, *Pocillopora damicornis*) Pacific Ocean, Weizhou Island, Guangxi Zhuang, China // Anti-osteoclastogenic and antibacterial effects of chlorinated polyketides from the Beibu Gulf coral-derived fungus *Aspergillus unguis* GXIMD 02505  
**417** // N // aspergillusidone H // IA vs 10 bact. strains.  
**418** // M // // IA to weak activ. vs 10 bact. strains.
- 165** Ascomycota *Aspergillus unguis* // (shrimp, *Rimicaris* sp.) Indian Ocean // Aspersterols A–D, ergostane-type sterols with an unusual unsaturated side chain from the deep-sea-derived fungus *Aspergillus unguis*  
**419** // N // aspersterol A // weak cytotox. vs 6 HTCLs; IA vs NO prod.  
**420** // N // aspersterol B // IA vs 6 HTCLs; IA vs NO prod.  
**421** // N // aspersterol C // IA vs 6 HTCLs; IA vs NO prod.  
**422** // N // aspersterol D // IA vs 6 HTCLs; IA vs NO prod.
- 166** Ascomycota *Aspergillus unguis* // (shrimp, *Rimicaris* sp.) Indian Ocean // Nitrogen-containing secondary metabolites from a deep-sea fungus *Aspergillus unguis* and their anti-inflammatory activity  
**423** // N // variotin B // IA vs NO prod.  
**424** // N // coniosulfide E // IA vs NO prod.

2 Marine microorganisms and phytoplankton: 2.3 Marine-sourced fungi (excluding from mangroves)

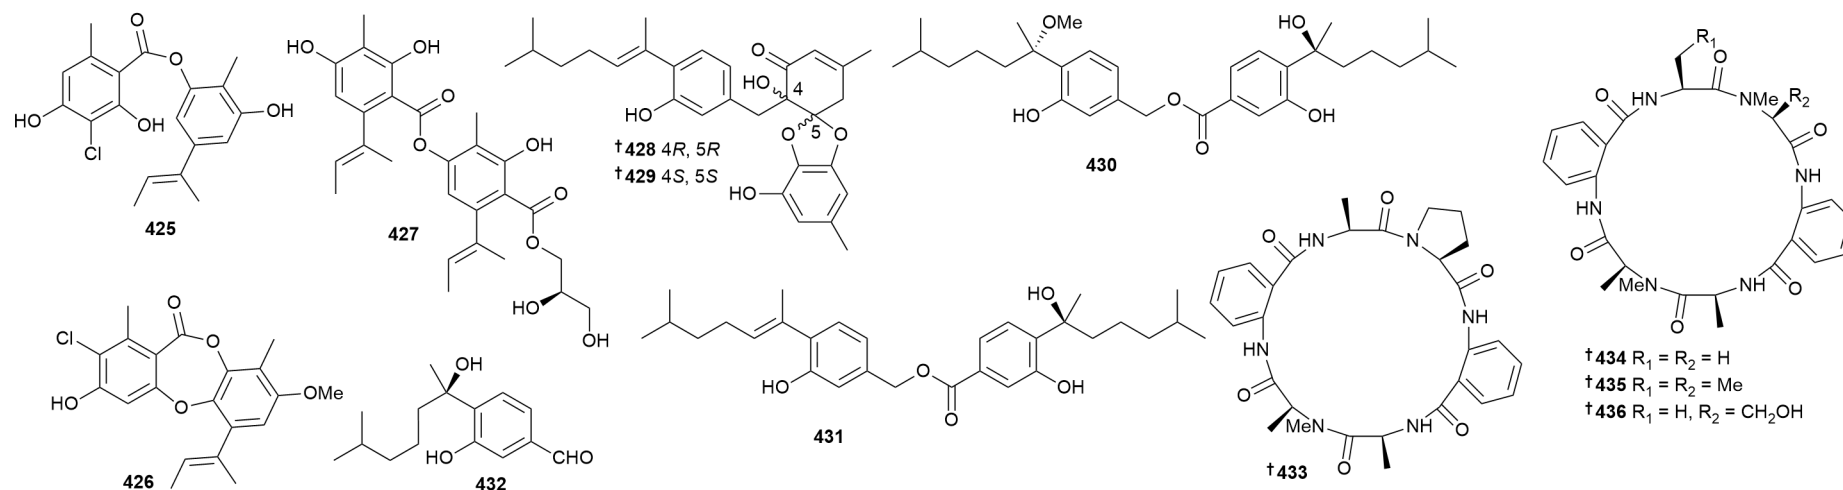

- 167** Ascomycota *Aspergillus unguis* // (seawater), (shrimp, *Rimicaris* sp.) Indian Ocean // Antibacterial and cytotoxic phenolic polyketides from two marine-derived fungal strains of *Aspergillus unguis*  
**425** // N // unguidepside C // IA vs 6 HTCLs; IA to weak activ. vs 6 bact. strains.  
**426** // N // aspersidone B // NT vs 6 HTCLs; IA to mod. activ. vs 6 bact. strains.  
**427** // N // agonodepside C // IA vs 6 HTCLs; IA to mod. activ. vs 6 bact. strains.
- 168** Ascomycota *Aspergillus versicolor* // (seawater) South China Sea // Homo/hetero-dimers of aromatic bisabolane sesquiterpenoids with neuroprotective activity from the fungus *Aspergillus versicolor* A18 from South China Sea  
**428** // N // (+)-asperbisabol A // weak neuroprotective activ. (SNP in PC12 cells).  
**429** // N // (-)-asperbisabol A // No neuroprotective activ. (SNP in PC12 cells).  
**430** // N // asperbisabol B // No neuroprotective activ. (SNP in PC12 cells).  
**431** // N // asperbisabol C // No neuroprotective activ. (SNP in PC12 cells).  
**432** // M // (*R*)-3-hydroxy-4-(2-hydroxy-6-methylheptan-2-yl)benzaldehyde // No neuroprotective activ. (SNP in PC12 cells).
- 169** Ascomycota *Aspergillus versicolor* // (seawater) Pacific ocean // Versicotide G suppresses osteoclastogenesis and prevents osteolysis  
**433** // N // versicotide G // weak inhib. osteoclastogenesis; IA vs 1 nHCL.  
**434** // N // versicotide H // weak inhib. osteoclastogenesis; IA vs 1 nHCL.  
**435** // N // versicotide I // weak inhib. osteoclastogenesis; IA vs 1 nHCL.  
**436** // N // versicotide J // IA vs inhib. osteoclastogenesis; IA vs 1 nHCL.

Key: Main article bibliography reference // Taxonomy // Location // Article title

Compound number // Status // Compound name // Biological activity and Other information

2 Marine microorganisms and phytoplankton:

2.3 Marine-sourced fungi (excluding from mangroves)

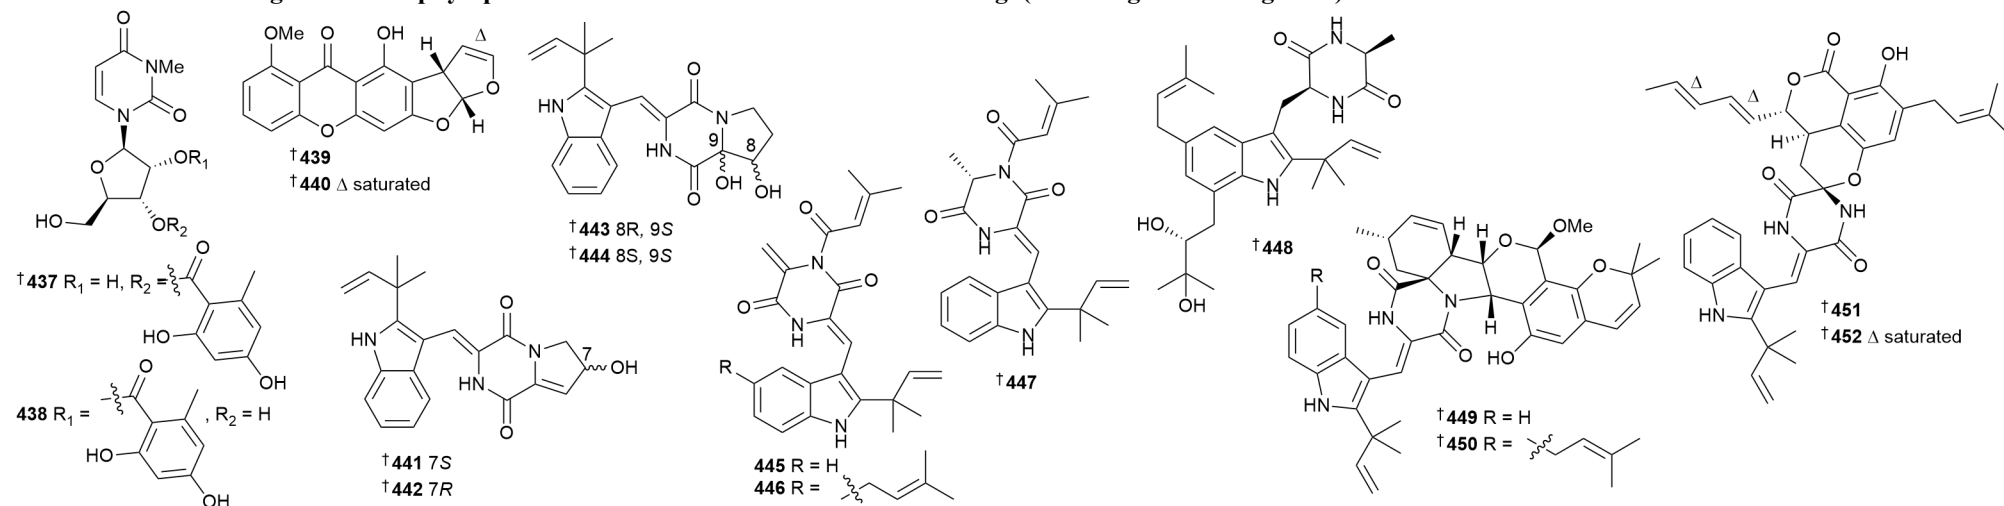

- 170** Ascomycota *Aspergillus versicolor* // (sediment) South China Sea // Two new nucleoside derivatives isolated from the marine-derived *Aspergillus versicolor* and their intramolecular transesterification  
**437** // N // kipukasin M // IA vs 6 HTCLs; IA vs 6 bact. strains; IA vs 1 fungus.  
**438** // N // kipukasin N // IA vs 6 HTCLs; IA vs 6 bact. strains; IA vs 1 fungus.
- 171** Ascomycota *Aspergillus* sp // (sediment) Philippine Sea // Two new austocystin analogs from the marine-derived fungus *Aspergillus* sp. WHUF05236  
**439** // N // austocystin P // IA vs 3 HTCLs, IA vs 16 bact. strains.  
**440** // N // austocystin Q // IA vs 3 HTCLs, IA vs 16 bact. strains.
- 172** Ascomycota *Aspergillus versicolor* // (sediment) Bohai, China // ( $\pm$ )-Brevianamides Z and Z1, new diketopiperazine alkaloids from the marine-derived fungus *Aspergillus versicolor*  
**441** // N // (+)-brevianamide Z // IA vs 1 HTCL; IA vs 11 bact. strains; IA vs 5 fungal strains.  
**442** // N // (-)-brevianamide Z // IA vs 1 HTCL; IA vs 11 bact. strains; IA vs 5 fungal strains.  
**443** // N // (+)-brevianamide Z1 // IA vs 1 HTCL; IA vs 11 bact. strains; IA vs 5 fungal strains.  
**444** // N // (-)-brevianamide Z1 // IA vs 1 HTCL; IA vs 11 bact. strains; IA vs 5 fungal strains.
- 173** Ascomycota *Aspergillus* sp // (sediment) Indian Ocean // Indole diketopiperazine alkaloids from the deep-sea-derived fungus *Aspergillus* sp. FS445  
**445** // N // aspechinulin A // IA vs NO prod.  
**446** // N // aspechinulin B // IA vs NO prod.  
**447** // N // aspechinulin C // IA vs NO prod.  
**448** // N // aspechinulin D // IA vs NO prod.
- 174** Ascomycota *Aspergillus* sp // (soft coral) South China Sea // Probing indole diketopiperazine-based hybrids as environmental-induced products from *Aspergillus* sp. EGF 15-0-3  
**449** // N // aspergilline A // IA vs 6 HTCLs.  
**450** // N // aspergilline B // IA vs 6 HTCLs.  
**451** // N // aspergilline C // IA to mod. cytotox. vs 6 HTCLs.  
**452** // N // aspergilline D // IA to mod.cytotox. vs 6 HTCLs.

Key: Main article bibliography reference // Taxonomy // Location // Article title

Compound number // Status // Compound name // Biological activity and Other information



## 2 Marine microorganisms and phytoplankton:

## 2.3 Marine-sourced fungi (excluding from mangroves)

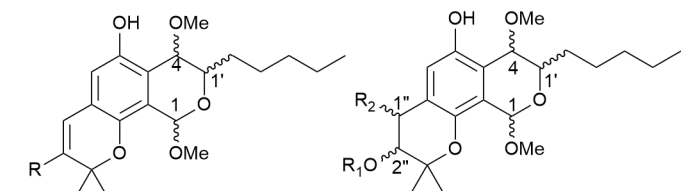

- †453 1S, 4R, 1'R, R = H  
 †454 1R, 4S, 1'S, R = H  
 †455 1S, 4R, 1'R, R = OMe  
 †456 1R, 4S, 1'S, R = OMe

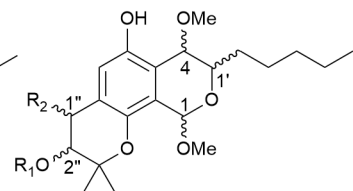

- †457 1S, 4R, 1'R, 2''S, R<sub>1</sub> = Me, R<sub>2</sub> = H  
 †458 1R, 4S, 1'S, 2''R, R<sub>1</sub> = Me, R<sub>2</sub> = H  
 †459 1S, 4R, 1'R, 2''S, R<sub>1</sub> = R<sub>2</sub> = H  
 †460 1R, 4S, 1'S, 2''R, R<sub>1</sub> = R<sub>2</sub> = H  
 †461 1S, 4R, 1'R, 1''S, 2''S, R<sub>1</sub> = H, R<sub>2</sub> = OH  
 †462 1R, 4S, 1'S, 1''R, 2''R, R<sub>1</sub> = H, R<sub>2</sub> = OH

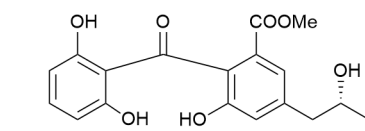

463

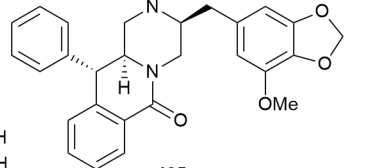

465

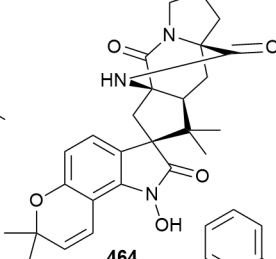

464

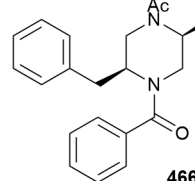

466

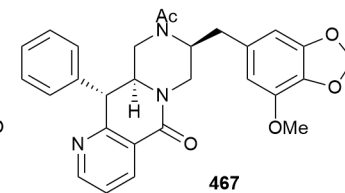

467

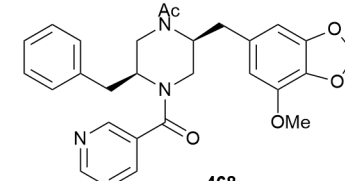

468

- 175 Ascomycota *Aspergillus* sp // (unspecified soft coral) South China Sea // Pyranodipyrans derivatives with tyrosyl DNA phosphodiesterase 1 inhibitory activities and fluorescent properties from *Aspergillus* sp. EGF 15-0-3  
 453 // R // (+)-eurotiumide G // No inhib. TDP1  
 454 // R // (-)-eurotiumide G // No inhib. TDP1  
 455 // N // (+)-aspergiletal A // No inhib. TDP1  
 456 // N // (-)-aspergiletal A // No inhib. TDP1  
 457 // N // (+)-aspergiletal B // No inhib. TDP1  
 458 // N // (-)-aspergiletal B // No inhib. TDP1  
 459 // N // (+)-aspergiletal C // No inhib. TDP1  
 460 // N // (-)-aspergiletal C // No inhib. TDP1  
 461 // N // (+)-aspergiletal D // No inhib. TDP1; weak inhib. TDP1 as rac.  
 462 // N // (-)-aspergiletal D // No inhib. TDP1; weak inhib. TDP1 as rac.
- 176 Ascomycota *Aspergillus* sp // (unspecified soft coral) Beihai, Guangxi Province, China // Asperbenzophenone A and versicolamide C, new fungal metabolites from the soft coral derived *Aspergillus* sp. SCSIO 41036  
 463 // N // asperbenzophenone A // IA vs AChE; IA vs NO prod.  
 464 // N // versicolamide C // IA vs AChE; IA vs NO prod.
- 177 Ascomycota *Aspergillus* sp // (fish, *Mugil* sp.) fish market, Brisbane, Australia. // Chrysosporazines revisited: regioisomeric phenylpropanoid piperazine P-glycoprotein inhibitors from Australian marine fish-derived fungi  
 465 // N // chrysosporazine T // mod. inhib. P-glycoprotein; IA vs 2 HTCLs; IA vs 2 bact. strains; IA vs 1 fungus.  
 466 // N // chrysosporazine U // IA vs inhib. P-glycoprotein; IA vs 2 HTCLs; IA vs 2 bact. strains; IA vs 1 fungus.  
 467 // N // azachrysosporazine T1 // mod. inhib. P-glycoprotein; IA vs 2 HTCLs; IA vs 2 bact. strains; IA vs 1 fungus.  
 468 // N // azachrysosporazine U1 // IA vs inhib. P-glycoprotein; IA vs 2 HTCLs; IA vs 2 bact. strains; IA vs 1 fungus.

2 Marine microorganisms and phytoplankton: 2.3 Marine-sourced fungi (excluding from mangroves)

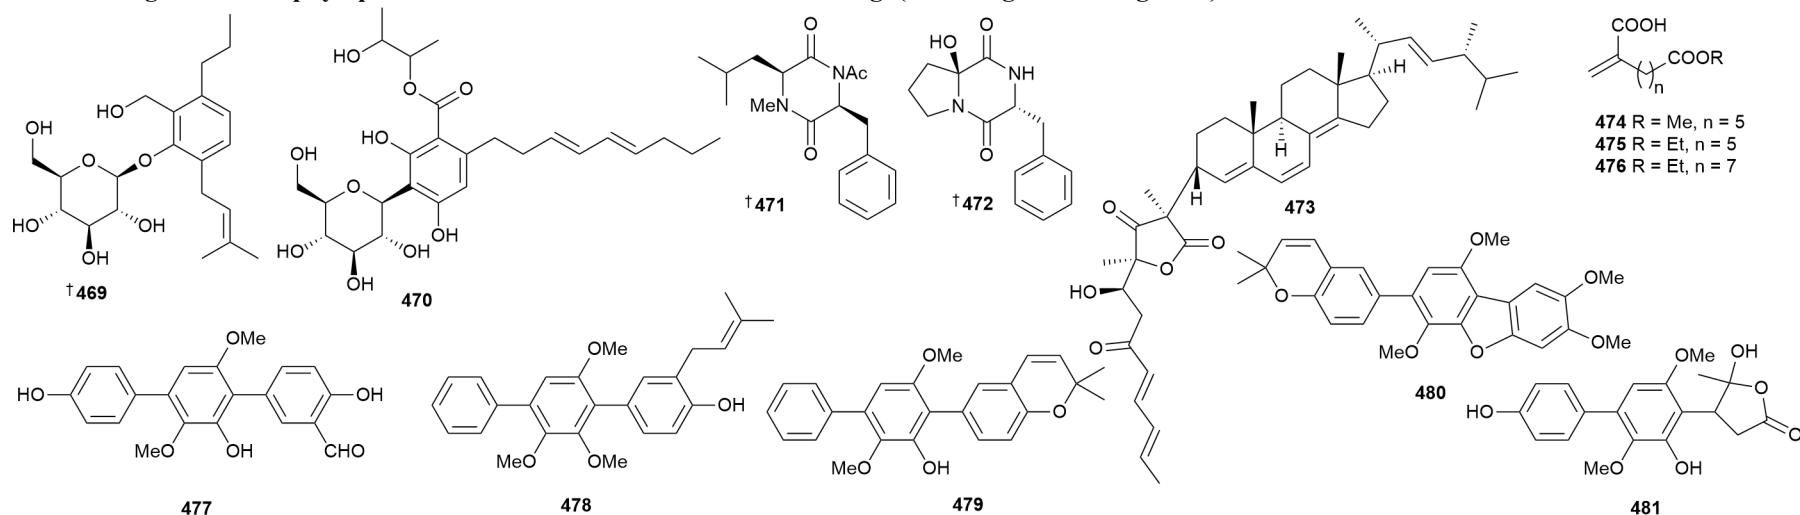

- 178** Ascomycota *Aspergillus* sp // (brown alga, *Saccharina cichorioides* f. *sachalinensis*) South China Sea // Two new phenolic glucosides from marine-derived fungus *Aspergillus* sp.  
**469** // N // 2-hydroxymethyl-6-(3-methylbut-2-en-1-yl)-3-propylphenyl-O-β-D-glucoside // IA vs NO prod.  
**470** // N // carnemycin H // IA vs NO prod.
- 179** Ascomycota *Aspergillus* sp // (ascidian, *Didemnum* sp.) Jizan, Saudi Red Sea // Asperopiperazines A and B: antimicrobial and cytotoxic dipeptides from a tunicate-derived fungus *Aspergillus* sp. DY001  
**471** // N // asperopiperazine A // IA vs 3 HTCLs; mod. activ. vs 2 bact. strains; mod. activ. vs 1 fungus.  
**472** // N // asperopiperazine B // IA vs 3 HTCLs; mod. activ. vs 2 bact. strains; mod. activ. vs 1 fungus.
- 180** Ascomycota *Aspergillus* sp // (red alga, *Grateloupia turuturu*) Qingdao, China // Tennesenoid A, an unprecedented steroid–sorbicillinoid adduct from the marine-derived endophyte of *Aspergillus* sp. strain 1022LEF  
**473** // N // tennesenoid A // weak activ. vs 8 fungal strains.
- 181** Ascomycota *Aspergillus* sp // (coral, *Acropora digitifera*) Subi Reef, Spratly Islands, China // Three new unsaturated fatty acids from marine-derived fungus *Aspergillus* sp. SCAU150  
**474** // N // pantheric acid D // IA vs 3 fungal strains.  
**475** // N // pantheric acid E // IA to weak activ. vs 3 fungal strains.  
**476** // N // pantheric acid F // IA vs 3 fungal strains.
- 182** Ascomycota *Aspergillus* sp // (unspecified coral) South China Sea, Sansha, Hainan, China // Discovery of p-terphenyl metabolites as potential phosphodiesterase PDE4D inhibitors from the coral-associated fungus *Aspergillus* sp. ITBBc1  
**477** // N // sanshamycin A // IA vs phosphodiesterase PDE4D.  
**478** // N // sanshamycin B // IA vs phosphodiesterase PDE4D.  
**479** // N // sanshamycin C // weak inhib. phosphodiesterase PDE4D.  
**480** // N // sanshamycin D // IA vs phosphodiesterase PDE4D.  
**481** // N // sanshamycin E // IA vs phosphodiesterase PDE4D.

2 Marine microorganisms and phytoplankton:

2.3 Marine-sourced fungi (excluding from mangroves)

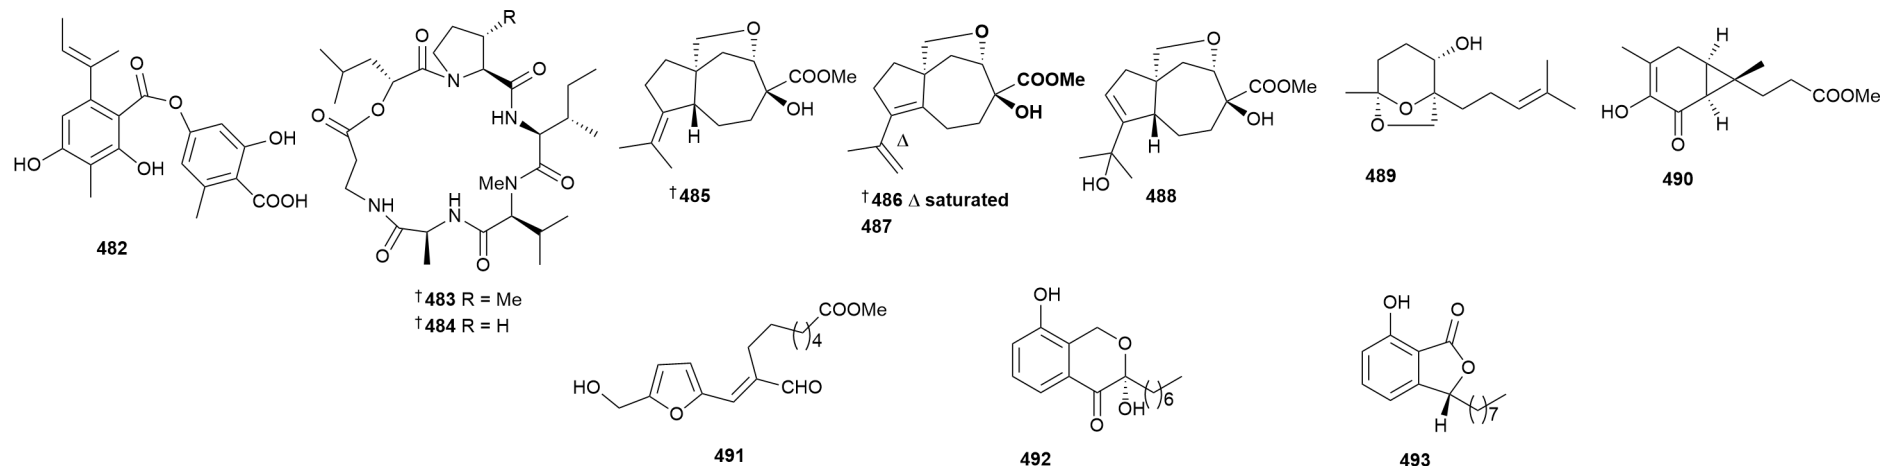

- 183** Ascomycota *Aspergillus* sp // (coral, *Acropora* sp.) Mischief Island, China // Anti-pathogenic depsidones and its derivatives from a coral-derived fungus *Aspergillus* sp. SCSIO SX7S7  
**482** // N // asperdepsidone A // IA vs 35 bact. strains.
- 184** Ascomycota *Beauveria felina* // (unidentified bryozoan) unspecified location // Experimental and computational analysis of the solution and solid-state conformations of hexadepsipeptides from *Beauveria felina*  
**483** // N // C<sub>30</sub>H<sub>51</sub>N<sub>5</sub>O<sub>7</sub> // IA vs nematodes; IA vs brine shrimp.  
**484** // N // C<sub>29</sub>H<sub>49</sub>N<sub>5</sub>O<sub>7</sub> // IA vs nematodes; IA vs brine shrimp.
- 185** Ascomycota *Byssochlamys spectabilis* // (red alga, *Rhodomela confervoides*) Dalian, China // Antimicrobial terpenoids and polyketides from the algicolous fungus *Byssochlamys spectabilis* RR-dl-2-13  
**485** // N // byssocarotin A // IA vs 3 bact. strains; IA vs 3 fungi.  
**486** // N // byssocarotin B // IA vs 3 bact. strains; IA vs 3 fungi.  
**487** // N // byssocarotin C // IA vs 3 bact. strains; IA vs 3 fungi.  
**488** // N // byssocarotin D // IA vs 3 bact. strains; IA vs 3 fungi.  
**489** // N // byssofarnesin // IA vs 3 bact. strains; IA vs 3 fungi.  
**490** // N // byssosesquicarin // IA vs 3 bact. strains; IA vs 3 fungi.  
**491** // N // Byssoketide A // IA to weak activ. vs 3 bact. strains; IA vs 3 fungi.  
**492** // N // Byssoketide B // IA to weak activ. vs 3 bact. strains; IA vs 3 fungi.  
**493** // N // (8*R*)-paecilocin A // IA vs 3 bact. strains; IA vs 3 fungi.

Key: Main article bibliography reference // Taxonomy // Location // Article title

Compound number // Status // Compound name // Biological activity and Other information

## 2 Marine microorganisms and phytoplankton:

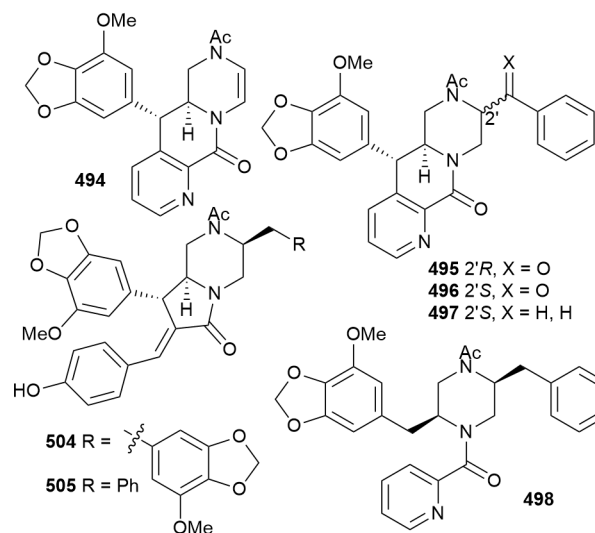

## 2.3 Marine-sourced fungi (excluding from mangroves)

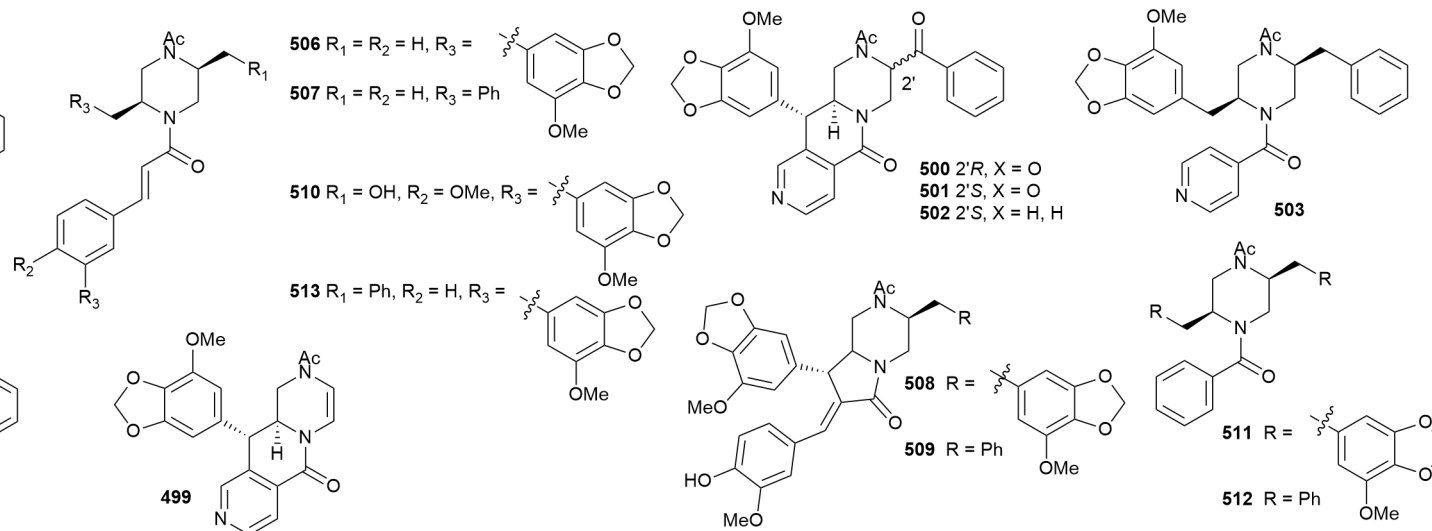

- 186** Ascomycota *Chrysozporium* sp // (fish, *Mugil* sp.) fish market, Brisbane, Australia // Neochrysozporazines: precursor-directed biosynthesis defines a marine-derived fungal natural product p-glycoprotein inhibitory pharmacophore
- 494** // N // neochrysozporazine A // IA vs 1 HTCL; mod. inhib. P-glycoprotein.
- 495** // N // neochrysozporazine B // IA vs 1 HTCL; mod. inhib. P-glycoprotein.
- 496** // N // neochrysozporazine C // IA vs 1 HTCL; mod. inhib. P-glycoprotein.
- 497** // N // neochrysozporazine D // IA vs 1 HTCL; mod. inhib. P-glycoprotein.
- 498** // N // neochrysozporazine E // IA vs 1 HTCL; weak inhib. P-glycoprotein.
- 499** // N // neochrysozporazine F // IA vs 1 HTCL; weak inhib. P-glycoprotein.
- 500** // N // neochrysozporazine G // IA vs 1 HTCL; mod. inhib. P-glycoprotein
- 501** // N // neochrysozporazine H // IA vs 1 HTCL; mod. inhib. P-glycoprotein
- 502** // N // neochrysozporazine I // IA vs 1 HTCL; weak inhib. P-glycoprotein
- 503** // N // neochrysozporazine J // IA vs 1 HTCL; weak inhib. P-glycoprotein
- 504** // N // neochrysozporazine K // IA vs 1 HTCL; weak inhib. P-glycoprotein
- 505** // N // neochrysozporazine L // IA vs 1 HTCL; weak inhib. P-glycoprotein
- 506** // N // chrysozporazine R // IA vs 1 HTCL; weak inhib. P-glycoprotein
- 507** // N // chrysozporazine S // IA vs 1 HTCL; weak inhib. P-glycoprotein
- 508** // N // neochrysozporazine M // IA vs 1 HTCL; weak inhib. P-glycoprotein
- 509** // N // neochrysozporazine N // IA vs 1 HTCL; weak inhib. P-glycoprotein
- 510** // N // neochrysozporazine O // IA vs 1 HTCL; weak inhib. P-glycoprotein
- 511** // N // neochrysozporazine P // IA vs 1 HTCL; weak inhib. P-glycoprotein
- 512** // N // neochrysozporazine Q // IA vs 1 HTCL; weak inhib. P-glycoprotein
- 513** // M // hancocockiamide C // IA vs 1 HTCL; weak inhib. P-glycoprotein

**Key:** Main article bibliography reference // Taxonomy // Location // Article title

Compound number // Status // Compound name // Biological activity and Other information

2 Marine microorganisms and phytoplankton:

2.3 Marine-sourced fungi (excluding from mangroves)

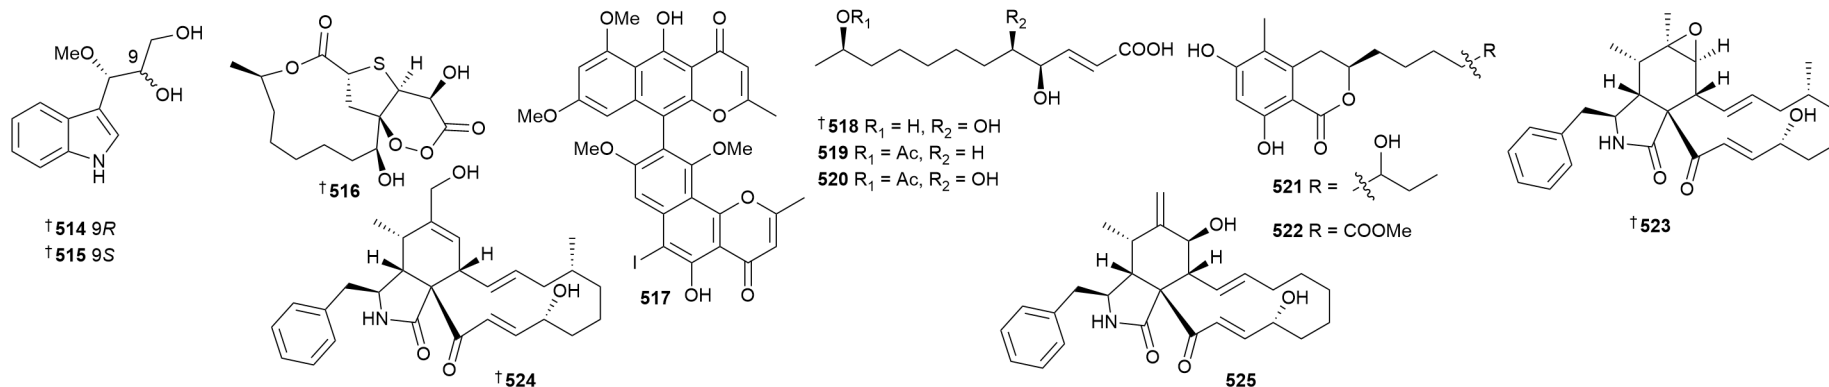

- 187** Ascomycota *Cladosporium cladosporioides* // (sediment) Southwest Indian Ocean // Cladosporioles A and B, two new indole derivatives from the deep-sea-derived fungus *Cladosporium cladosporioides* 170056  
**514** // N // cladosporiole A // IA vs 1 bact strain.  
**515** // N // cladosporiole B // IA vs 1 bact strain.
- 188** Ascomycota *Cladosporium cladosporioides* // (sediment) Hainan Island, China // Sulfurated and iodinated metabolites from the cold-seep fungus *Cladosporium cladosporioides* 8-1  
**516** // N // cladosporioidin A // IA to mod. activ. vs 9 bact. strains.  
**517** // N // (aS)-6-iodofonsecinone A // IA to pot. activ. vs 9 bact. strains.
- 189** Ascomycota *Cladosporium oxysporum* // (sediment) Southwest Indian Ocean // Chemical constituents of the deep-sea-derived fungus *Cladosporium oxysporum* 170103 and their antibacterial effects  
**518** // N // (5R)-hydroxysecepatulolide C // IA vs 1 bact. strain.  
**519** // N // 11-O-acetylsecepatulolide C // IA vs 1 bact. strain.  
**520** // N // 11-O-acetyl-5R-hydroxysecepatulolide C // IA vs 1 bact. strain.
- 190** Ascomycota *Cosmospora* sp. (co-culture with terrestrial *Magnaporthe oryzae*) // (unspecified source) Baltic Sea // Induction of isochromanones by co-cultivation of the marine fungus *Cosmospora* sp. and the phytopathogen *Magnaporthe oryzae*  
**521** // N // soudanone H // NT.  
**522** // N // soudanone I // NT.
- 191** Ascomycota *Curvularia verruculosa* // (squat lobster, *Shinkaia crosnieri*) South China Sea, China // New cytochalasin derivatives from deep-sea cold seep-derived endozoic fungus *Curvularia verruculosa* CS-129  
**523** // N // 6β,7β-epoxydeoxaphomin C // IA to weak activ. vs 10 bact. strains.  
**524** // N // 12-hydroxydeoxaphomin C // IA vs 10 bact. strains.  
**525** // N // 24-nor-cytochalasin B // IA vs 10 bact. strains.

2 **Marine microorganisms and phytoplankton:** 2.3 **Marine-sourced fungi (excluding from mangroves)**

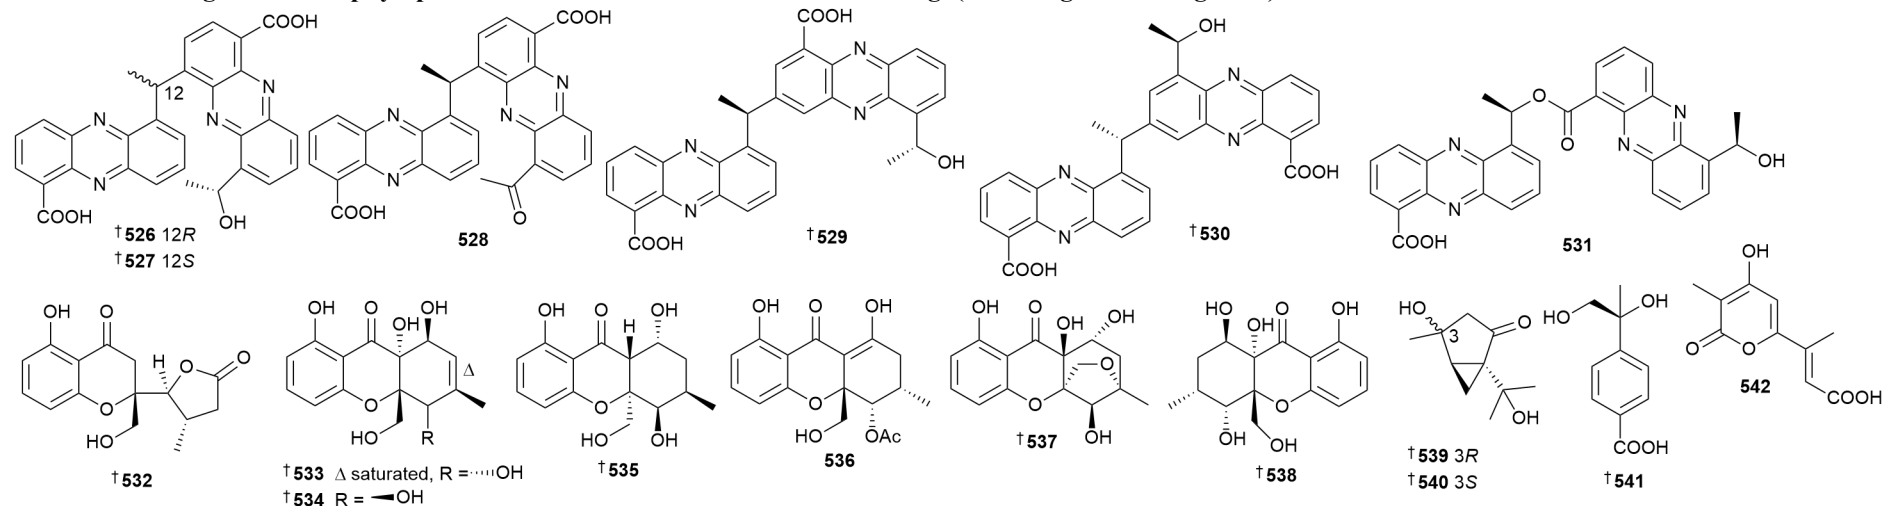

- 192** Basidiomycota *Cystobasidium laryngis* // (sediment) Indian Ocean // Isolation, structure determination, and semisynthesis of diphenazine compounds from a deep-sea-derived strain of the fungus *Cystobasidium laryngis* and their biological activities  
**526** // N // phenazostatin E // IA vs 6 HTCLs; IA vs NO prod.  
**527** // N // phenazostatin F // IA vs 6 HTCLs; IA vs NO prod.  
**528** // N // phenazostatin G // IA vs 6 HTCLs; IA vs NO prod.  
**529** // N // phenazostatin H // IA vs 6 HTCLs; IA vs NO prod.  
**530** // N // phenazostatin I // IA vs 6 HTCLs; IA vs NO prod.  
**531** // N // phenazostatin J // pot. cytotox. vs 6 HTCLs; pot. inhib. NO prod.
- 193** Ascomycota *Diaporthe* sp // (ascidian, *Styela plicata*) Bay of Da'ao, Shenzhen City, Guangdong, Province, China // Mono- and dimeric xanthenes with anti-glioma and anti-inflammatory activities from the ascidian-derived fungus *Diaporthe* sp. SYSU-MS4722  
**532** // N // diaporthone A // IA vs 3 HTCLs; IA vs NO prod.  
**533** // N // diaporthone B // IA vs 3 HTCLs; IA vs NO prod.  
**534** // N // diaporthone C // IA vs 3 HTCLs; IA vs NO prod.  
**535** // N // diaporthone D // IA vs 3 HTCLs; IA vs NO prod.  
**536** // N // diaporthone E // IA vs 3 HTCLs; IA vs NO prod.  
**537** // N // diaporthone F // IA vs 3 HTCLs; IA vs NO prod.  
**538** // N // diaporthone G // IA vs 3 HTCLs; IA vs NO prod.
- 194** Ascomycota *Diaporthe* sp // (ascidian, *Styela plicata*) Bay of Da'ao, Shenzhen City, Guangdong Province, China // Bioactive monoterpenes and polyketides from the ascidian-derived fungus *Diaporthe* sp. SYSU-MS4722  
**539** // N // diaporterpene A // IA vs 1 HTCL; IA vs antioxid.; IA vs NO prod.  
**540** // N // diaporterpene B // IA vs 1 HTCL; IA vs antioxid.; IA vs NO prod.  
**541** // N // diaporterpene C // IA vs 1 HTCL; IA vs antioxid.; IA vs NO prod.  
**542** // N // diaporpyrone A // IA vs 1 HTCL; IA vs antioxid.; IA vs NO prod.

**Key:** Main article bibliography reference // Taxonomy // Location // Article title

Compound number // Status // Compound name // Biological activity and Other information

## 2 Marine microorganisms and phytoplankton:

## 2.3 Marine-sourced fungi (excluding from mangroves)

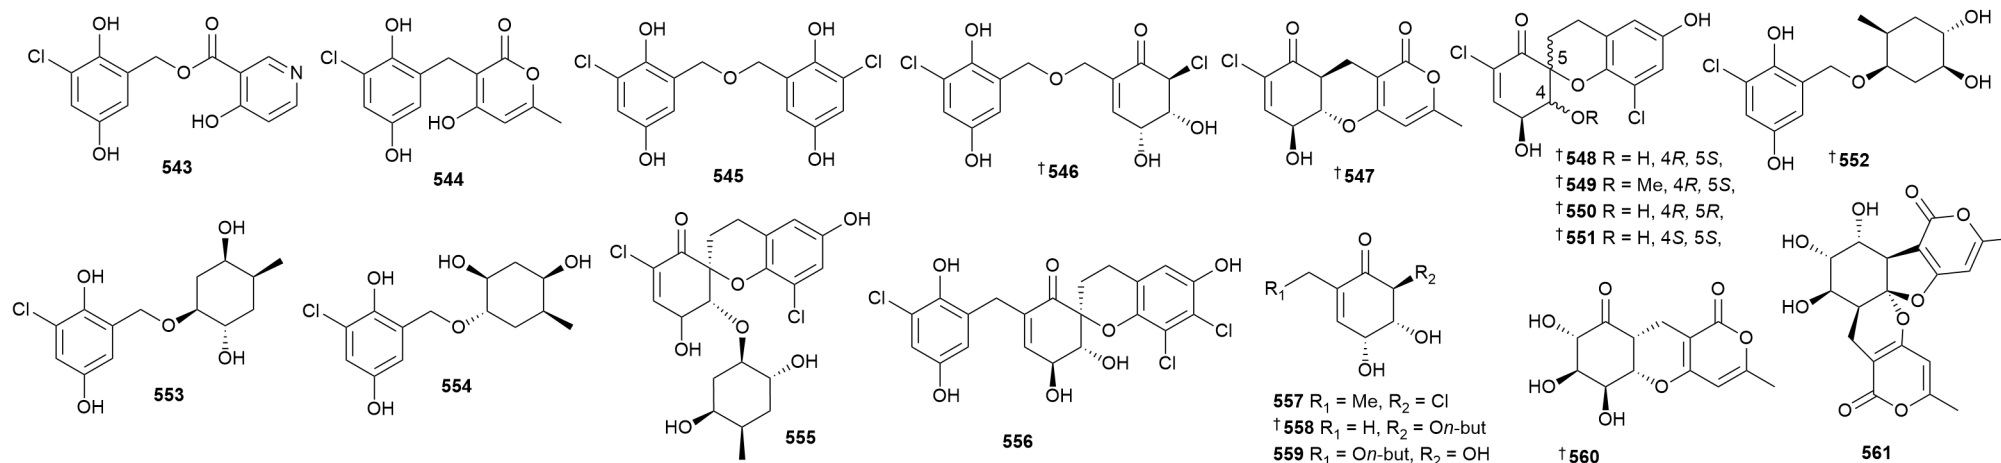

195 Ascomycota *Epicoccum* sp // (sediment) Kueishantao, Taiwan // Exploring gabosine and chlorogentisyl alcohol derivatives from a marine-derived fungus as EcGUS inhibitors with informatic assisted approaches

543 // N // 3-chloro-2,5-dihydroxybenzyl 4-hydroxynicotinate // weak inhib.  $\beta$ -glucuronidase.

544 // N // 3-(3-chloro-2,5-dihydroxybenzyl)-4-hydroxy-6-methyl-2H-pyran-2-one // NT.

545 // N // 6,6'-(oxybis(methylene))bis(2-chlorobenzene-1,4-diol) // mod. inhib.  $\beta$ -glucuronidase.

546 // N // (4R,5R,6S)-6-chloro-2-(((3-chloro-2,5-dihydroxybenzyl)oxy)methyl)-4,5-dihydroxycyclohex-2-en-1-one // weak inhib.  $\beta$ -glucuronidase.

547 // N // (5aS,6S,9aS)-8-chloro-6-hydroxy-3-methyl-5a,6,9a,10-tetrahydro-1H,9H-pyrano[4,3-b]chromene-1,9-dione // NT.

548 // N // (2S,5'S,6'R)-3',8-dichloro-5',6,6'-trihydroxyspiro[chromane-2,1'-cyclohexan]-3'-en-2'-one // weak inhib.  $\beta$ -glucuronidase.

549 // N // (2S,5'S,6'R)-3',8-dichloro-5',6-dihydroxy-6'-methoxyspiro[chromane-2,1'-cyclohexan]-3'-en-2'-one // weak inhib.  $\beta$ -glucuronidase.

550 // N // (2R,5'S,6'R)-3',8-dichloro-5',6,6'-trihydroxyspiro[chromane-2,1'-cyclohexan]-3'-en-2'-one // NT.

551 // N // (2S,5'S,6'S)-3',8-dichloro-5',6,6'-trihydroxyspiro[chromane-2,1'-cyclohexan]-3'-en-2'-one // weak inhib.  $\beta$ -glucuronidase.

552 // N // 2-chloro-6-(((1R,2S,4S,5S)-4,5-dihydroxy-2-methylcyclohexyl)oxy)methyl)benzene-1,4-diol // mod. inhib.  $\beta$ -glucuronidase.

553 // N // 2-chloro-6-(((1S,2S,4S,5R)-2,5-dihydroxy-4-methylcyclohexyl)oxy)methyl)benzene-1,4-diol // mod. inhib.  $\beta$ -glucuronidase.

554 // N // 2-chloro-6-(((1S,2S,4R,5S)-2,4-dihydroxy-5-methylcyclohexyl)oxy)methyl)benzene-1,4-diol // mod. inhib.  $\beta$ -glucuronidase.

555 // N // (2S,6'R)-3',8-dichloro-6'-(((1R,2R,4R,5S)-2,5-dihydroxy-4-methylcyclohexyl)oxy)-5',6-dihydroxyspiro[chromane-2,1'-cyclohexan]-3'-en-2'-one // NT.

556 // N // (2S,5'S,6'R)-7,8-dichloro-3'-(3-chloro-2,5-dihydroxybenzyl)-5',6,6'-trihydroxyspiro[chromane-2,1'-cyclohexan]-3'-en-2'-one // mod. inhib.  $\beta$ -glucuronidase.

557 // N // (4R,5R,6S)-6-chloro-2-ethyl-4,5-dihydroxycyclohex-2-en-1-one // weak inhib.  $\beta$ -glucuronidase.

558 // N // (4R,5R,6S)-6-butoxy-4,5-dihydroxy-2-methylcyclohex-2-en-1-one // weak inhib.  $\beta$ -glucuronidase.

559 // N // (4R,5R,6S)-2-(butoxymethyl)-4,5,6-trihydroxycyclohex-2-en-1-one // NT.

560 // N // (5aS,6S,7R,8S,9aR)-6,7,8-trihydroxy-3-methyl-5a,6,7,8,9a,10-hexahydro-1H,9H-pyrano[4,3-b]chromene-1,9-dione // NT.

561 // N // (4bR,5R,6S,7R,7aS,13aS)-5,6,7-trihydroxy-2,11-dimethyl-4b,5,6,7,7a,8-hexahydro-4H,9H-pyrano[4,3-b]pyrano[3',4':4,5]furo[3,2-i]chromene-4,9-dione // NT.

Key: Main article bibliography reference // Taxonomy // Location // Article title

Compound number // Status // Compound name // Biological activity and Other information

2 Marine microorganisms and phytoplankton: 2.3 Marine-sourced fungi (excluding from mangroves)

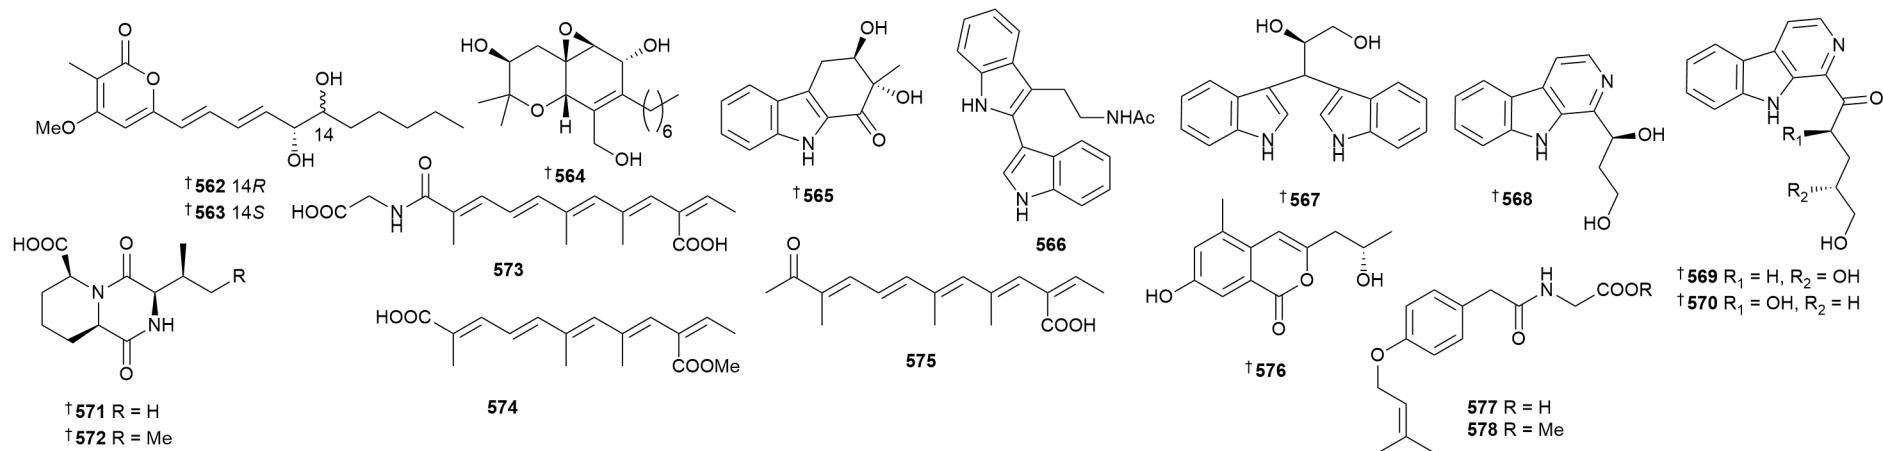

- 196** Ascomycota *Eutypella scoparia* // (seawater) Bohai Sea, Huanghua, China // Anti-inflammatory polyketides from the marine-derived fungus *Eutypella scoparia*  
**562** // N // eutyketide A // IA vs 1 murine nCL; weak inhib. NO prod.  
**563** // N // eutyketide B // IA vs 1 murine nCL; IA vs NO prod.  
**564** // N // cytosporin X // IA vs 1 murine nCL; IA vs NO prod.
- 197** Ascomycota *Exophiala oligosperma* // (seawater) South China Sea // Exophilone, a tetrahydrocarbazol-1-one analogue with anti-pulmonary fibrosis activity from the deep-sea fungus *Exophiala oligosperma* MCCC 3A01264  
**565** // N // exophilone // IA vs 1 nHCL; weak inhib. vs TGF- $\beta$ 1
- 198** Ascomycota *Fusarium solani* // (soft coral, *Sargassum tortuosum*) South China Sea // Indole alkaloids fusarindoles A–E from marine-derived fungus *Fusarium equiseti* LJ-1  
**566** // N // fusarindole A // IA vs 5 HTCLs.  
**567** // N // fusarindole B // IA vs 5 HTCLs.  
**568** // N // fusarindole C // IA vs 5 HTCLs.  
**569** // N // fusarindole D // IA vs 5 HTCLs.  
**570** // N // fusarindole E // IA vs 5 HTCLs.
- 199** Ascomycota *Fusarium graminearum* // (underwater rock) Richardson's Beach, Big Island, Hawaii // Polyketides, diketopiperazines and an isochromanone from the marine-derived fungal strain *Fusarium graminearum* FM1010 from Hawaii  
**571** // N // gramipiperazine A // IA vs 1 HTCL; IA vs 1 nHCL; IA vs 2 bact. strains; IA vs NF- $\kappa$ B  
**572** // N // gramipiperazine B // IA vs 1 HTCL; IA vs 1 nHCL; IA vs 2 bact. strains; IA vs NF- $\kappa$ B  
**573** // N // kaneoheic acid G // IA vs 1 HTCL; IA vs 1 nHCL; IA vs 2 bact. strains; IA vs NF- $\kappa$ B  
**574** // N // kaneoheic acid H // IA vs 1 HTCL; IA vs 1 nHCL; IA vs 2 bact. strains; IA vs NF- $\kappa$ B  
**575** // N // kaneoheic acid I // IA vs 1 HTCL; IA vs 1 nHCL; IA vs 2 bact. strains; IA vs NF- $\kappa$ B  
**576** // N // 7-hydroxy-3-(2-hydroxy-propyl)-5-methyl-*epi*-isochroman-1-one // IA vs 1 HTCL; IA vs 1 nHCL; IA vs 2 bact. strains; IA vs NF- $\kappa$ B
- 200** Ascomycota *Fusarium* sp // (sediment) Kueishantao, Taiwan // Two new prenylated glycine derivatives from the marine-derived fungus *Fusarium* sp. TW56-10  
**577** // N // N-(4-[(3-methylbut-2-en-1-yl)oxy]phenyl)acetyl)glycine // IA vs 1 HTCL.  
**578** // N // methyl N-(4-[(3-methylbut-2-en-1-yl)oxy]phenyl)acetyl)glycinate // NT.

Key: Main article bibliography reference // Taxonomy // Location // Article title

Compound number // Status // Compound name // Biological activity and Other information



2 Marine microorganisms and phytoplankton: 2.3 Marine-sourced fungi (excluding from mangroves)

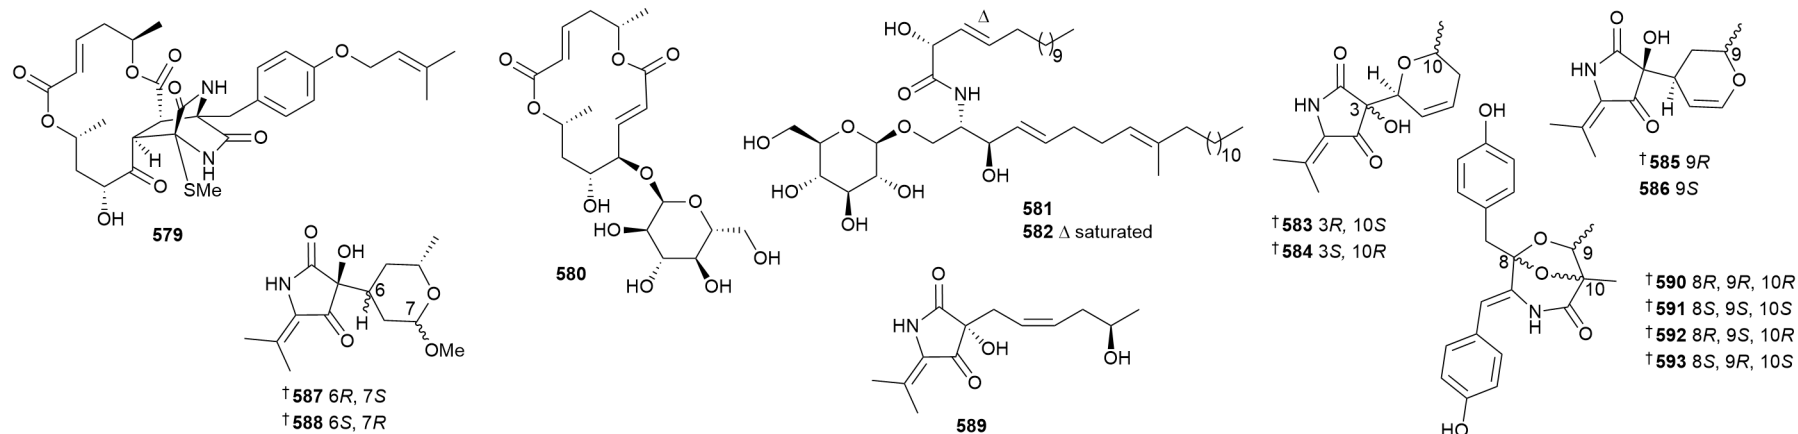

- 201** Ascomycota // (brown alga, *Sargassum thunbergii*) Osaka Bay, Japan // Isolation and structure elucidation of new cytotoxic macrolides halosmysins B and C from the fungus *Halosphaeriaceae* sp. associated with a marine alga  
**579** // N // halosmysin B // IA to weak cytotox. vs 2 HTCLs; IA vs 1 murine TCL.  
**580** // N // halosmysin C // IA vs 2 HTCLs; IA vs 1 murine TCL.
- 202** Ascomycota *Hortaea werneckii* // ("moss sponge") Danzhou, Hainan, China // Two new cerebroside metabolites from the marine fungus *Hortaea werneckii*  
**581** // N // hortacerebroside A // weak inhib. NO prod.  
**582** // N // hortacerebroside B // weak inhib. NO prod.
- 203** Ascomycota *Lecanicillium fusisporum* // (sediment) Mariana Trench // New 3-acyl tetramic acid derivatives from the deep-sea-derived fungus *Lecanicillium fusisporum*  
**583** // N // lecanicilliumin A // IA vs 2 HTCLs; IA vs 1 nHCL; IA vs NF-κB  
**584** // N // lecanicilliumin B // IA vs 2 HTCLs; IA vs 1 nHCL; IA vs NF-κB  
**585** // N // lecanicilliumin C // IA vs 2 HTCLs; IA vs 1 nHCL; IA vs NF-κB  
**586** // N // lecanicilliumin D // IA vs 2 HTCLs; IA vs 1 nHCL; IA vs NF-κB  
**587** // N // lecanicilliumin E // IA vs 2 HTCLs; IA vs 1 nHCL; IA vs NF-κB  
**588** // N // lecanicilliumin F // IA vs 2 HTCLs; IA vs 1 nHCL; IA vs NF-κB  
**589** // N // lecanicilliumin G // IA vs 2 HTCLs; IA vs 1 nHCL; IA vs NF-κB
- 204** Ascomycota *Leptosphaerulina chartarum* // (sediment) Western Pacific Basin // Total synthesis of leptochartamides A and B: two enantiomeric pairs of hydroxybenzyl dimers from a deep-sea fungus *Leptosphaerulina chartarum*  
**590** // N // (-)-leptochartamide A // IA vs 9 HTCLs; IA vs 1 nHCL.  
**591** // N // (+)-leptochartamide A // IA vs 9 HTCLs; IA vs 1 nHCL.  
**592** // N // (-)-leptochartamide B // IA to weak cytotox. vs 9 HTCLs; IA vs 1 nHCL.  
**593** // N // (+)-leptochartamide B // IA to weak cytotox. vs 9 HTCLs; IA vs 1 nHCL.

Key: Main article bibliography reference // Taxonomy // Location // Article title

Compound number // Status // Compound name // Biological activity and Other information

2 Marine microorganisms and phytoplankton: 2.3 Marine-sourced fungi (excluding from mangroves)

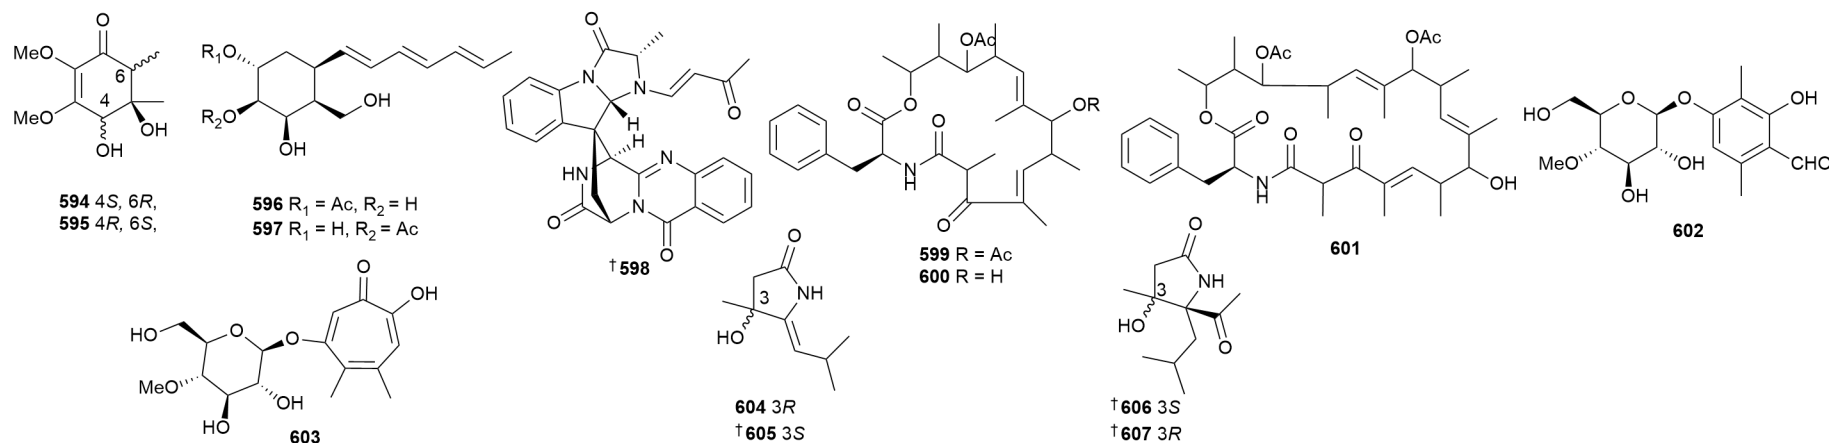

- 205** Ascomycota *Lopadostoma pouzarii* // (unidentified sponge) Cu Lao Cham Island, Quang Nam, Vietnam // Cytoprotective polyketides from sponge-derived fungus *Lopadostoma pouzarii*  
**594** // N // lopouzanone A // IA vs 1 HTCL; IA vs 1 nMCL; IA vs antioxid. (DPPH), IA vs cardioprotective effect (rotenone, cobalt chloride).  
**595** // N // lopouzanone B // IA vs 1 HTCL; IA vs 1 nMCL; IA vs antioxid. (DPPH), IA vs cardioprotective effect (rotenone, cobalt chloride).  
**596** // N // 1-*O*-acetyl dendrochol B // IA vs 1 HTCL; IA vs 1 nMCL; IA vs antioxid. (DPPH), IA vs cardioprotective effect (rotenone, cobalt chloride).  
**597** // N // 2-*O*-acetyl dendrochol B // NT.
- 206** Ascomycota *Metarhizium* sp // (seawater) Qingdao Huiquan Bay, Yellow Sea // Bioactive alkaloids from the marine-derived fungus *Metarhizium* sp. P2100  
**598** // N // *N*-butenonelapatin A // IA to weak cytotox. vs 20 HTCLs; IA vs 3 bact. strains; IA vs 3 fungal strains; IA vs NO inhib. prod.; IA vs antioxid. (DPPH, Fe<sup>3+</sup> reduction).
- 207** Ascomycota *Metarhizium* sp // (fish, *Mugil* sp.) fish market, Brisbane, Australia. // Metarhizides A–C and metarhizosides A–B: PKS-NRPS macrolides and aromatic glycosides from an Australian fish gut-derived fungus, *Metarhizium* sp. CMB-F624  
**599** // N // metarhizide A // IA vs 2 HTCLs; IA vs 3 bact. strains; IA vs 1 fungus.  
**600** // N // metarhizide B // IA vs 2 HTCLs; IA vs 3 bact. strains; IA vs 1 fungus.  
**601** // N // metarhizide C // IA vs 2 HTCLs; IA vs 3 bact. strains; IA vs 1 fungus.  
**602** // N // metarhizoside A // IA vs 2 HTCLs; IA vs 3 bact. strains; IA vs 1 fungus.  
**603** // N // metarhizoside B // IA vs 2 HTCLs; IA vs 3 bact. strains; IA vs 1 fungus.
- 208** Ascomycota *Monascus* sp // (bivalve mollusc, *Meretrix lusoria*) Hailing Island, Yangjiang, People's Republic of China // Monascuslactams A–D, cytotoxic  $\gamma$ -lactams from marine fungus *Monascus albidus* BB3  
**604** // N // monascuslactam A // IA vs 8 HTCLs; IA vs 2 nHCLs.  
**605** // N // monascuslactam B // IA vs 8 HTCLs; IA vs 2 nHCLs.  
**606** // N // monascuslactam C // IA vs 8 HTCLs; IA vs 2 nHCLs.  
**607** // N // monascuslactam D // IA vs 8 HTCLs; IA to weak cytotox. vs 2 nHCLs.

2 Marine microorganisms and phytoplankton: 2.3 Marine-sourced fungi (excluding from mangroves)

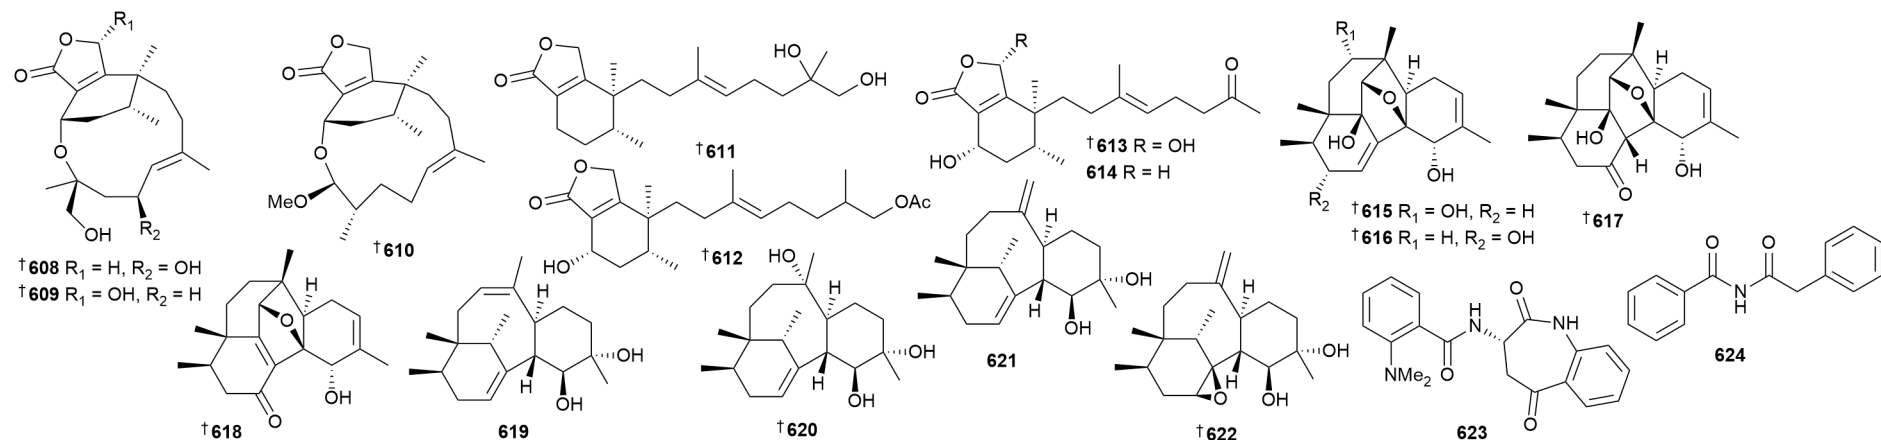

- 209** Ascomycota *Neocucurbitaria unguis-hominis* // (sediment) South China Sea // Neocucurbins A–G, novel macrocyclic diterpenes and their derivatives from *Neocucurbitaria unguis-hominis* FS685  
**608** // N // neocucurbin A // IA vs 3 HTCLs; IA vs 2 bact. strains.  
**609** // N // neocucurbin B // IA vs 3 HTCLs; IA vs 2 bact. strains.  
**610** // N // neocucurbin C // IA vs 3 HTCLs; IA vs 2 bact. strains.  
**611** // N // neocucurbin D // IA vs 3 HTCLs; IA vs 2 bact. strains.  
**612** // N // neocucurbin E // IA vs 3 HTCLs; IA vs 2 bact. strains.  
**613** // N // neocucurbin F // IA vs 3 HTCLs; IA vs 2 bact. strains.  
**614** // N // neocucurbin G // IA vs 3 HTCLs; IA vs 2 bact. strains.
- 210** Ascomycota *Neocucurbitaria unguis-hominis* // (sediment) South China Sea // Neocucurbols A–H, phomactin diterpene derivatives from the marine-derived fungus *Neocucurbitaria unguis-hominis* FS685  
**615** // N // neocucurbol A // IA vs 4 HTCLs; IA vs 2 bact. strains.  
**616** // N // neocucurbol B // IA vs 4 HTCLs; IA vs 2 bact. strains.  
**617** // N // neocucurbol C // IA vs 4 HTCLs; IA vs 2 bact. strains.  
**618** // N // neocucurbol D // IA vs 4 HTCLs; IA vs 2 bact. strains.  
**619** // N // neocucurbol E // IA vs 4 HTCLs; IA vs 2 bact. strains.  
**620** // N // neocucurbol F // IA vs 4 HTCLs; IA vs 2 bact. strains.  
**621** // N // neocucurbol G // IA vs 4 HTCLs; IA vs 2 bact. strains.  
**622** // N // neocucurbol H // IA vs 4 HTCLs; IA vs 2 bact. strains.
- 211** Ascomycota *Neosartorya pseudofischeri* // unspecified source // Genome mining discovery of a new benzazepine alkaloid pseudofisnin A from the marine fungus *Neosartorya pseudofischeri* F27-1  
**623** // N // pseudofisnin A // NT.
- 212** Ascomycota *Ochroconis humicola* // Indian Ocean // Metabolites of the marine fungus *Ochroconis humicola* (Y9-1)  
**624** // N // N-(2-phenylacetyl)benzamide // NT.

Key: Main article bibliography reference // Taxonomy // Location // Article title

Compound number // Status // Compound name // Biological activity and Other information

2 Marine microorganisms and phytoplankton:

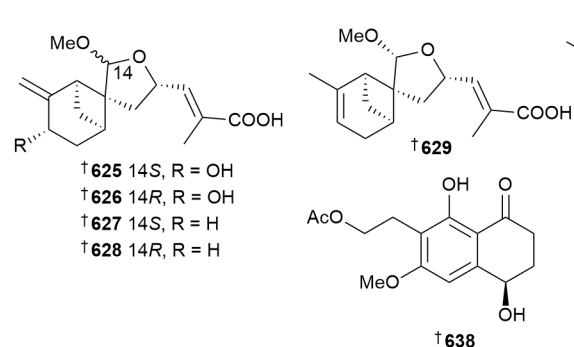

2.3 Marine-sourced fungi (excluding from mangroves)

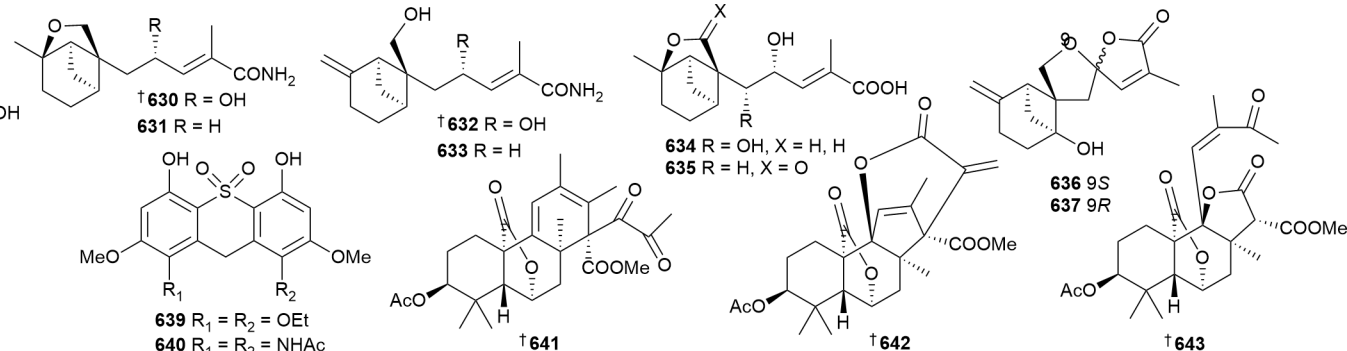

- 213** Ascomycota *Paraconiothyrium brasiliense* // (sediment) Indian Ocean // Brasilterpenes A–E, bergamotane sesquiterpenoid derivatives with hypoglycemic activity from the deep sea-derived fungus *Paraconiothyrium brasiliense* HDN15-135  
**625** // N // brasilterpene A // weak hypoglycemic activ. (zebrafish).  
**626** // N // brasilterpene B // IA vs hypoglycemic activ. (zebrafish).  
**627** // N // brasilterpene C // weak hypoglycemic activ. (zebrafish).  
**628** // N // brasilterpene D // IA vs hypoglycemic activ. (zebrafish).  
**629** // N // brasilterpene E // IA vs hypoglycemic activ. (zebrafish).
- 214** Ascomycota *Paraconiothyrium sporulosum* // (sediment) Bohai Bay, Liaoning Province, China // Polyhydroxylated bergamotane-type sesquiterpenoids from cultures of *Paraconiothyrium sporulosum* YK-03 and their absolute configurations  
**630** // N // sporulamide A // NT.  
**631** // N // sporulamide B // NT.  
**632** // N // sporulamide C // NT.  
**633** // N // sporulamide D // NT.  
**634** // N // sporulosoic acid A // NT.  
**635** // N // sporulosoic acid B // NT.  
**636** // N // sporuloketal A // NT.  
**637** // N // sporuloketal B // NT.
- 215** Ascomycota *Paraconiothyrium* sp // (crab, *Chironantes haematocheir*) Zhoushan, Zhejiang, China // A new polyketide from marine-derived *Paraconiothyrium* sp  
**638** // N // paraconthone A // IA vs 4 HTCLs; IA vs 6 bact. strains; IA vs anti-inflam.
- 216** Ascomycota *Penicillium aculeatum*, Ascomycota *Talaromyces aculeatus* // (red alga, *Laurencia obtusa*) Abo El-Darag coast, Egypt // Bioactive sulfonyl metabolites from the Red Sea endophytic fungus *Penicillium aculeatum*  
**639** // N // pensulfonoxo // IA to weak cytotox. vs 3 HTCLs.  
**640** // N // pensulfonamide // IA to weak cytotox. vs 3 HTCLs.
- 217** Ascomycota *Penicillium antarcticum* // (brown alga, *Sargassum miyabei*) Sea of Japan // Meroantartines A–C, meroterpenoids with rearranged skeletons from the alga-derived fungus *Penicillium antarcticum* KMM 4685 with potent P-glycoprotein inhibitory activity  
**641** // N // meroantartine A // IA vs 5 HTCLs; mod. inhib. P-glycoprotein; mod. MDR reversal.  
**642** // N // meroantartine B // IA vs 5 HTCLs; mod. inhib. P-glycoprotein; mod. MDR reversal.  
**643** // N // meroantartine C // IA vs 5 HTCLs; mod. inhib. P-glycoprotein; mod. MDR reversal.

Key: Main article bibliography reference // Taxonomy // Location // Article title

Compound number // Status // Compound name // Biological activity and Other information

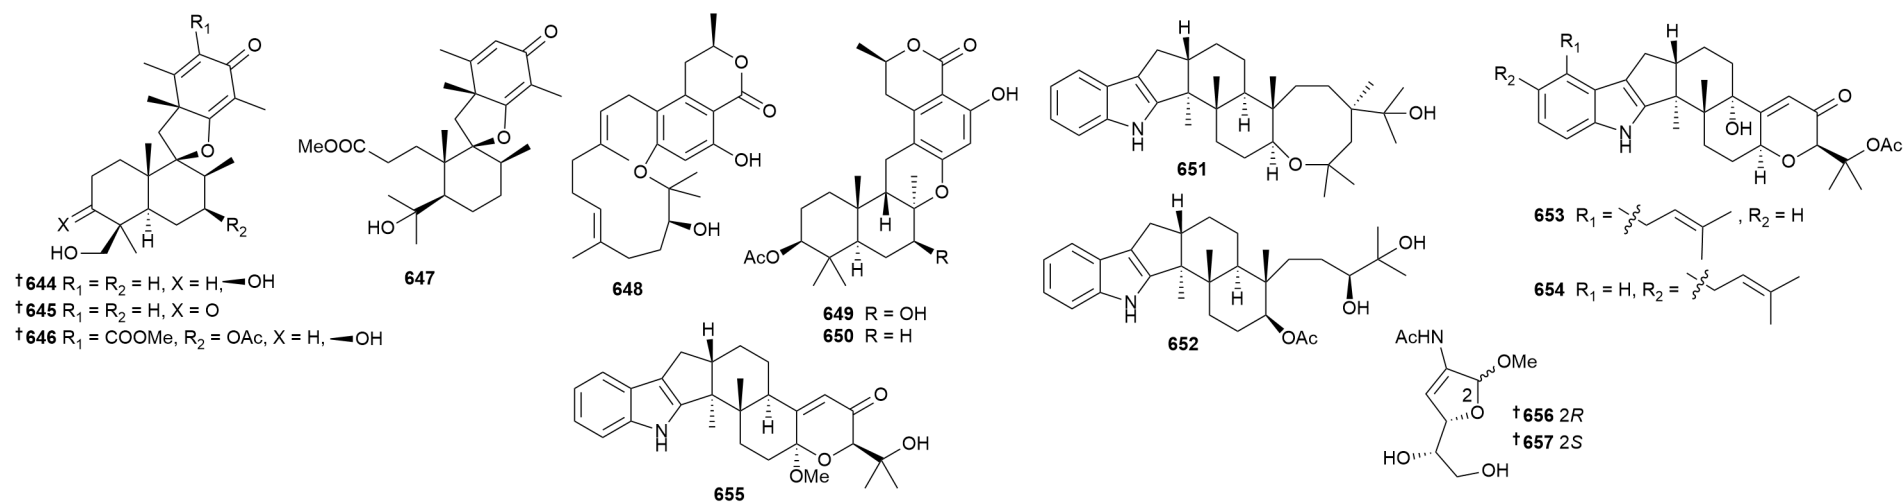

- 218** Ascomycota *Penicillium* sp // (red alga, *Pterocladia tenuis*) Rongcheng, Shandong Province, China // Mining new meroterpenoids from the marine red alga-derived endophytic *Penicillium chermesinum* EN-480 by comparative transcriptome analysis  
 644 // N // chermesins E // weak to pot. activ. vs 5 bact. strains; weak to mod. activ. vs 2 fungal strains.  
 645 // N // chermesins F // weak to pot. activ. vs 5 bact. strains; IA vs 2 fungal strains.  
 646 // N // chermesins G // weak activ. vs 5 bact. strains; IA to weak activ. vs 2 fungal strains.  
 647 // N // chermesins H // IA to mod. activ. vs 5 bact. strains; IA vs 2 fungal strains.
- 219** Ascomycota *Penicillium chrysogenum* // (sediment) Antarctic Ocean // Chrysomutanin and related meroterpenoids from a DES mutant of the marine-derived fungus *Penicillium chrysogenum* S-3-25  
 648 // N // chrysomutanin // IA to weak cytotox. vs 5 HTCLs.  
 649 // N // 3-acetyl chrodrimanin F // IA vs 5 HTCLs.  
 650 // N // 3-acetoxypentacecilde A // IA to weak cytotox. vs 5 HTCLs.
- 220** Ascomycota *Penicillium brefeldianum* // (sediment) Fujian province, China // Paspalines C–D and paxillines B–D: new indole diterpenoids from *Penicillium brefeldianum* WZW-F-69  
 651 // N // paspaline C // IA to mod. cytotox. vs 10 HTCLs; IA vs 2 bact. strains; IA vs 2 fungal strains.  
 652 // N // paspaline D // IA vs 10 HTCLs; IA vs 2 bact. strains; IA vs 2 fungal strains.  
 653 // N // paxilline B // IA vs 10 HTCLs; IA vs 2 bact. strains; IA vs 2 fungal strains.  
 654 // N // paxilline C // IA vs 10 HTCLs; IA vs 2 bact. strains; IA vs 2 fungal strains.  
 655 // N // paxilline D // IA vs 10 HTCLs; IA vs 2 bact. strains; IA vs 2 fungal strains.
- 221** Ascomycota *Penicillium chrysogenum* // (red alga, *Grateloupia turuturu*) Qingdao, China // Two new *N*-acetyl-D-glucosamine derivatives from the medical algae-derived endophytic fungus *Penicillium chrysogenum*  
 656 // N // penichryfuran A // IA to weak cytotox. vs 3 HTCLs.  
 657 // N // penichryfuran B // IA vs 3 HTCLs.

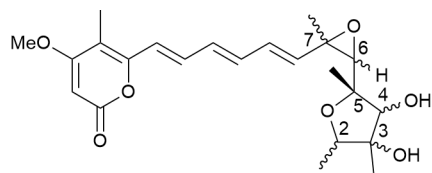

† **658** 2S, 3S, 4R, 5S, 6S, 7S  
 † **659** 2R, 3R, 4S, 5S, 6S, 7S  
 † **660** 2S, 3S, 4R, 5S, 6R, 7R  
 † **661** 2S, 3R, 4S, 5R, 6R, 7R  
 † **662** 2R, 3S, 4R, 5R, 6S, 7S  
 † **663** 2R, 3R, 4S, 5S, 6R, 7R

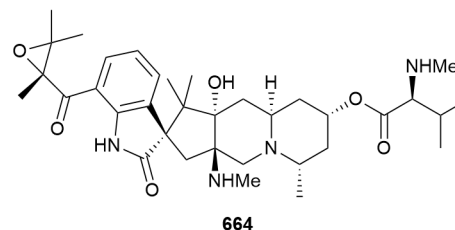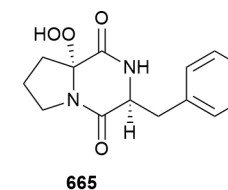

- 222** Ascomycota *Penicillium citreonigrum* // (sediment) Northeastern Pacific // Chemical constituents of the deep-sea-derived *Penicillium citreonigrum* MCCC 3A00169 and their antiproliferative effects  
**658** // N // citreoviridin J // IA vs 1 HTCL.  
**659** // N // citreoviridin K // IA vs 1 HTCL.  
**660** // N // citreoviridin L // IA vs 1 HTCL.  
**661** // N // citreoviridin M // IA vs 1 HTCL.  
**662** // N // citreoviridin N // IA vs 1 HTCL.  
**663** // N // citreoviridin O // IA vs 1 HTCL.
- 223** Ascomycota *Penicillium citrinum* // (sediment) Indian Ocean // Citrinadin C, a new cytotoxic pentacyclic alkaloid from marine-derived fungus *Penicillium citrinum*  
**664** // N // citrinadin C // IA vs 1 HTCL; IA vs 3 bact. strains.
- 224** Ascomycota *Penicillium commune* // (ascidian, *Didemnum* sp.) Jizan, Saudi Red Sea // Characterization of bioactive compounds from the Red Sea tunicate-derived fungus *Penicillium commune* DY004  
**665** // N // penicillazine A // IA vs 3 HTCLs

2 Marine microorganisms and phytoplankton: 2.3 Marine-sourced fungi (excluding from mangroves)

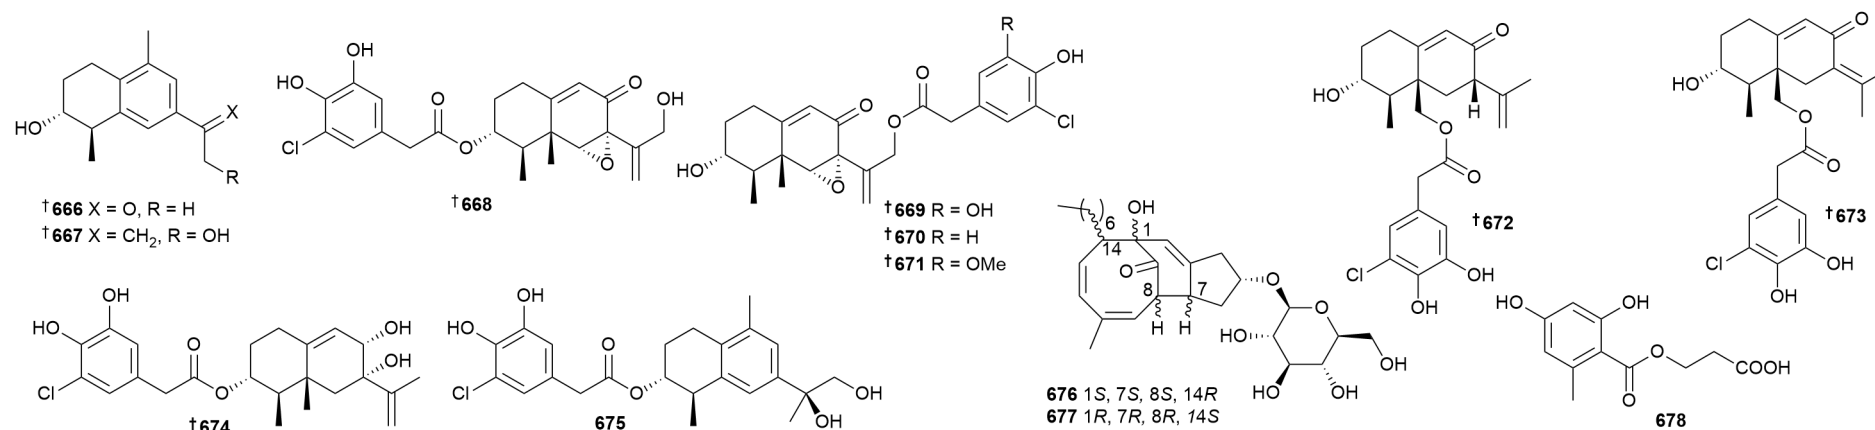

225 Ascomycota *Penicillium copticola* // (sponge, *Xestospongia testudinaria*) Weizhou island, China // Eremophilane-type sesquiterpenes from a marine-derived fungus *Penicillium copticola* with antitumor and neuroprotective activities

666 // N // copteremophilane A // IA vs 3 HTCLs.

667 // N // copteremophilane B // IA vs 3 HTCLs.

668 // N // copteremophilane C // IA vs 3 HTCLs.

669 // N // copteremophilane D // IA to weak cytotox. vs 3 HTCLs.

670 // N // copteremophilane E // IA to weak cytotox. vs 3 HTCLs.

671 // N // copteremophilane F // IA vs 3 HTCLs.

672 // N // copteremophilane G // IA vs 3 HTCLs; weak inhib. vs LDH; weak inhib. vs malondialdehyde.

673 // N // copteremophilane H // IA to weak cytotox. vs 3 HTCLs.

674 // N // copteremophilane I // IA vs 3 HTCLs.

675 // N // copteremophilane J // IA vs 3 HTCLs.

676 // N // 5-glycopenostatin F // NT vs 3 HTCLs.

677 // N // 5-glycopenostatin I // NT vs 3 HTCLs.

226 Ascomycota *Penicillium crustosum* // (sediment) Prydz Bay, Antarctica via heterologous expression in *Aspergillus nidulans* // Formation of 3-orsellinoxipropanoic acid in *Penicillium crustosum* is catalyzed by a bifunctional nonreducing polyketide synthase

678 // N // 3-orsellinoxipropanoic acid // NT.

**2 Marine microorganisms and phytoplankton: 2.3 Marine-sourced fungi (excluding from mangroves)**

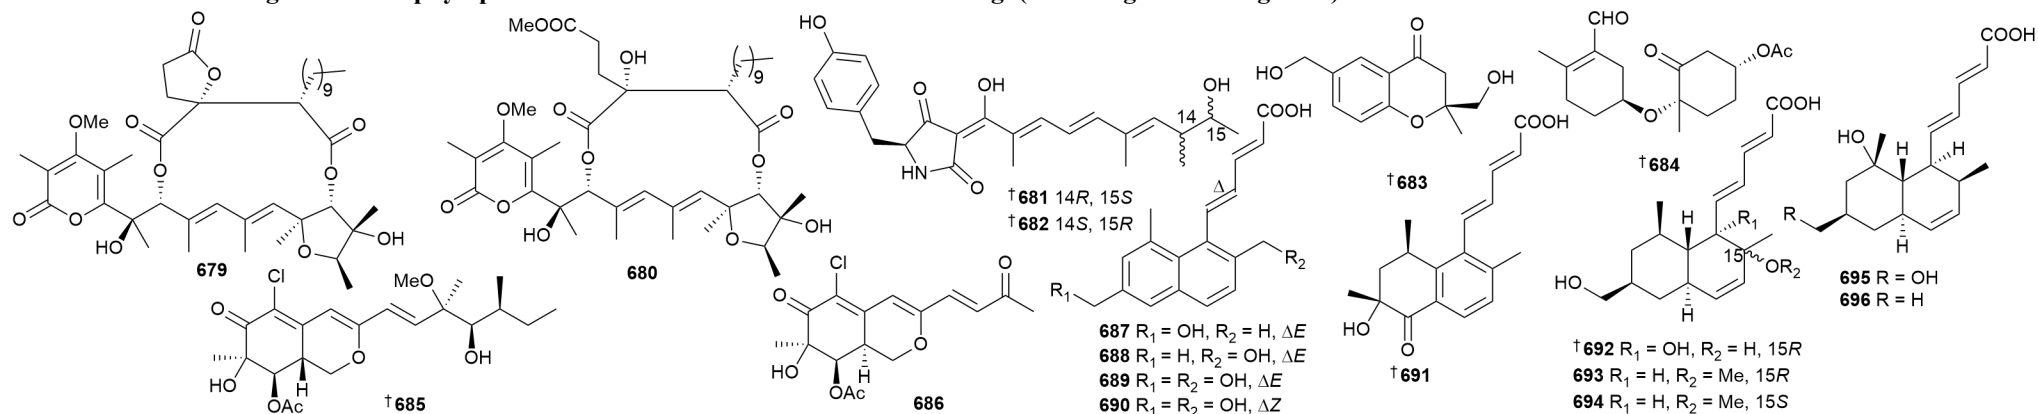

- 227** Ascomycota *Penicillium cyclopium* // (sediment) East China Sea // Cyclopiumolides A and B, unusual 13-membered macrolides from the deep sea-sourced fungus *Penicillium cyclopium* SD-413 with antiproliferative activities  
**679** // N // cyclopiumolide A // IA vs 3 HTCLs.  
**680** // N // cyclopiumolide B // weak cytotox. vs 3 HTCLs.
- 228** Ascomycota *Penicillium oxalicum* // (sediment) Sanggou Bay, Yellow Sea, China // Identification of PKS-NRPS hybrid metabolites in marine-derived *Penicillium oxalicum*  
**681** // N // oxopyrrolidine A // IA vs 1 bact. strain.  
**682** // N // oxopyrrolidine B // IA vs 1 bact. strain.
- 229** Ascomycota *Penicillium oxalicum* // (red alga, *Rhodomela confervoides*) Lianyungang, Jiangsu province, China // Polyketides isolated from an endophyte *Penicillium oxalicum* 2021CDF-3 inhibit pancreatic tumor growth  
**683** // N // oxalichroman A // IA vs 1 HTCL.  
**684** // N // oxalihexane A // weak cytotox. vs 1 HTCL.
- 230** Ascomycota *Penicillium sclerotiorum* // (sponge) Quanfu Island, Hainan, China // Two new azaphilones from the marine-derived fungus *Penicillium sclerotiorum* E23Y-1A  
**685** // N // penicilazaphilone F // IA vs NO prod.  
**686** // N // penicilazaphilone G // IA vs NO prod..
- 231** Ascomycota *Penicillium steckii* // (coral, *Acanthogorgia* sp.) Magellan seamounts // Tanzawaic acid derivatives: fungal polyketides from the deep-sea coral-derived endozoic *Penicillium steckii* AS-324  
**687** // N // steckwaic acid A // IA to mod. activ. vs 8 bact. strains; IA vs 1 fungus.  
**688** // N // steckwaic acid B // IA to weak activ. vs 8 bact. strains; IA vs 1 fungus.  
**689** // N // steckwaic acid C // IA vs 8 bact. strains; IA vs 1 fungus.  
**690** // N // steckwaic acid D // IA vs 8 bact. strains; IA vs 1 fungus.  
**691** // N // 11-ketotanzawaic acid D // IA to mod. activ. vs 8 bact. strains; IA vs 1 fungus.  
**692** // N // 6,15-dihydroxytanzawaic acid M // IA to mod. activ. vs 8 bact. strains; IA vs 1 fungus.  
**693** // N // 15R-methoxytanzawaic acid M // IA to mod. activ. vs 8 bact. strains; IA vs 1 fungus.  
**694** // N // 15S-methoxytanzawaic acid M // IA to mod. activ. vs 8 bact. strains; IA vs 1 fungus.  
**695** // N // 8-hydroxytanzawaic acid M // IA to mod. activ. vs 8 bact. strains; IA vs 1 fungus.  
**696** // N // 8-hydroxytanzawaic acid B // IA to weak activ. vs 8 bact. strains; IA vs 1 fungus.

**Key:** Main article bibliography reference // Taxonomy // Location // Article title

Compound number // Status // Compound name // Biological activity and Other information



2 Marine microorganisms and phytoplankton: 2.3 Marine-sourced fungi (excluding from mangroves)

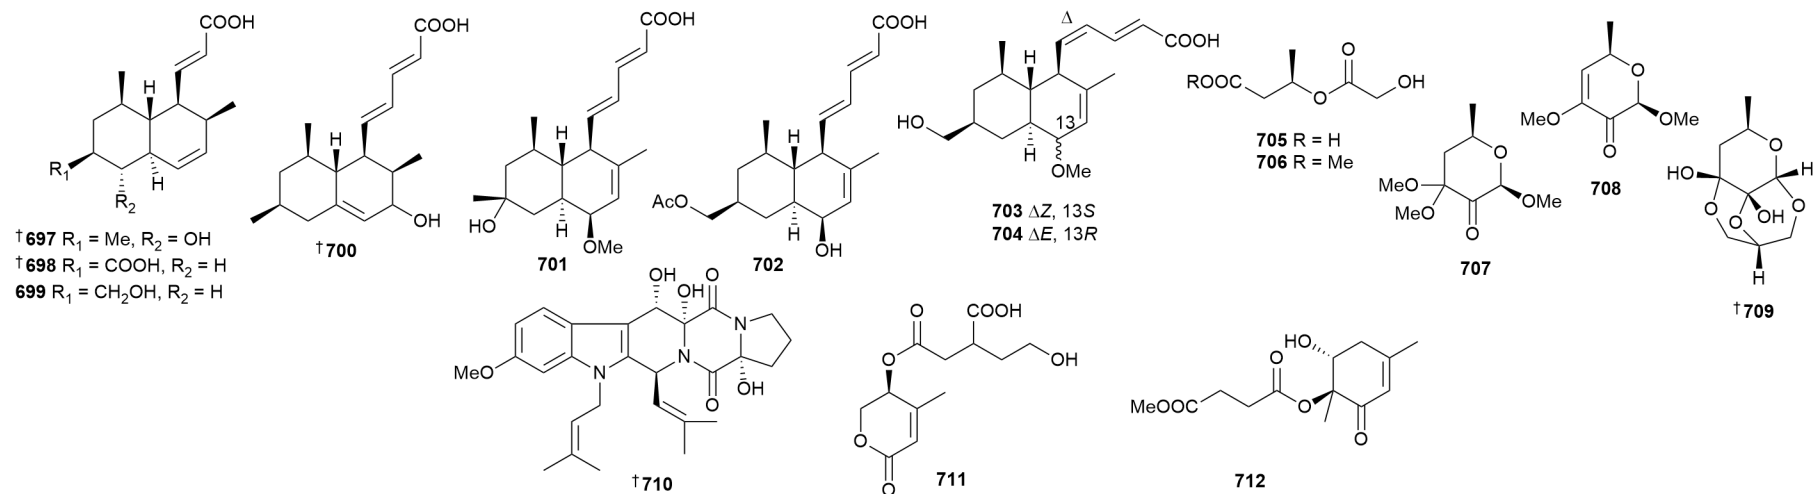

- 232** Ascomycota *Penicillium steckii* // (soft coral, *Acanthogorgiidae* sp.) Magellan Seamounts, Western Pacific Ocean // Uncommon polyketides from *Penicillium steckii* AS-324, a marine endozoic fungus isolated from deep-sea coral in the Magellan Seamount  
 697 // N // steckwaic acid E // IA vs 10 bact. strains; IA vs 7 fungal strains.  
 698 // N // steckwaic acid F // IA vs 10 bact. strains; IA vs 7 fungal strains.  
 699 // N // steckwaic acid G // IA vs 10 bact. strains; IA vs 7 fungal strains.  
 700 // N // steckwaic acid H // IA vs 10 bact. strains; IA vs 7 fungal strains.  
 701 // N // 10-hydroxytanzawaic acid U // IA to weak activ. vs 10 bact. strains; IA vs 7 fungal strains.  
 702 // N // 18-O-acetyltanzawaic acid R // IA vs 10 bact. strains; IA vs 7 fungal strains.  
 703 // N // steckwaic acid I // IA vs 10 bact. strains; IA vs 7 fungal strains.  
 704 // N // 13R-tanzawaic acid S // IA to mod. activ. vs 10 bact. strains; IA vs 7 fungal strains.
- 233** Ascomycota *Penicillium sumatraense* // (brown alga, *Sargassum cristaefolium*) Badouzi, Keelung, Taiwan // Chemical constituents and anti-angiogenic principles from a marine algicolous *Penicillium sumatraense* SC29  
 705 // N // penisterine A // IA vs anti-angiogenesis.  
 706 // N // penisterine B // IA vs anti-angiogenesis.  
 707 // N // penisterine C // IA vs anti-angiogenesis.  
 708 // N // penisterine D // weak vs anti-angiogenesis  
 709 // N // penisterine E // IA vs anti-angiogenesis.
- 234** Ascomycota *Penicillium* sp // (sediment) Hydrothermal vent, Kueishantao, Taiwan // New diketopiperazine alkaloid and polyketides from marine-derived fungus *Penicillium* sp. TW58-16 with antibacterial activity against *Helicobacter pylori*  
 710 // N // (8S,9R,12R,18S)-12-hydroxyl-fumitremorgin B // IA vs 6 bact. strains.  
 711 // N // walterolactone E // IA vs 6 bact. strains.  
 712 // N // leptosphaerone D // IA vs 6 bact. strains.

Key: Main article bibliography reference // Taxonomy // Location // Article title  
 Compound number // Status // Compound name // Biological activity and Other information

2 Marine microorganisms and phytoplankton: 2.3 Marine-sourced fungi (excluding from mangroves)

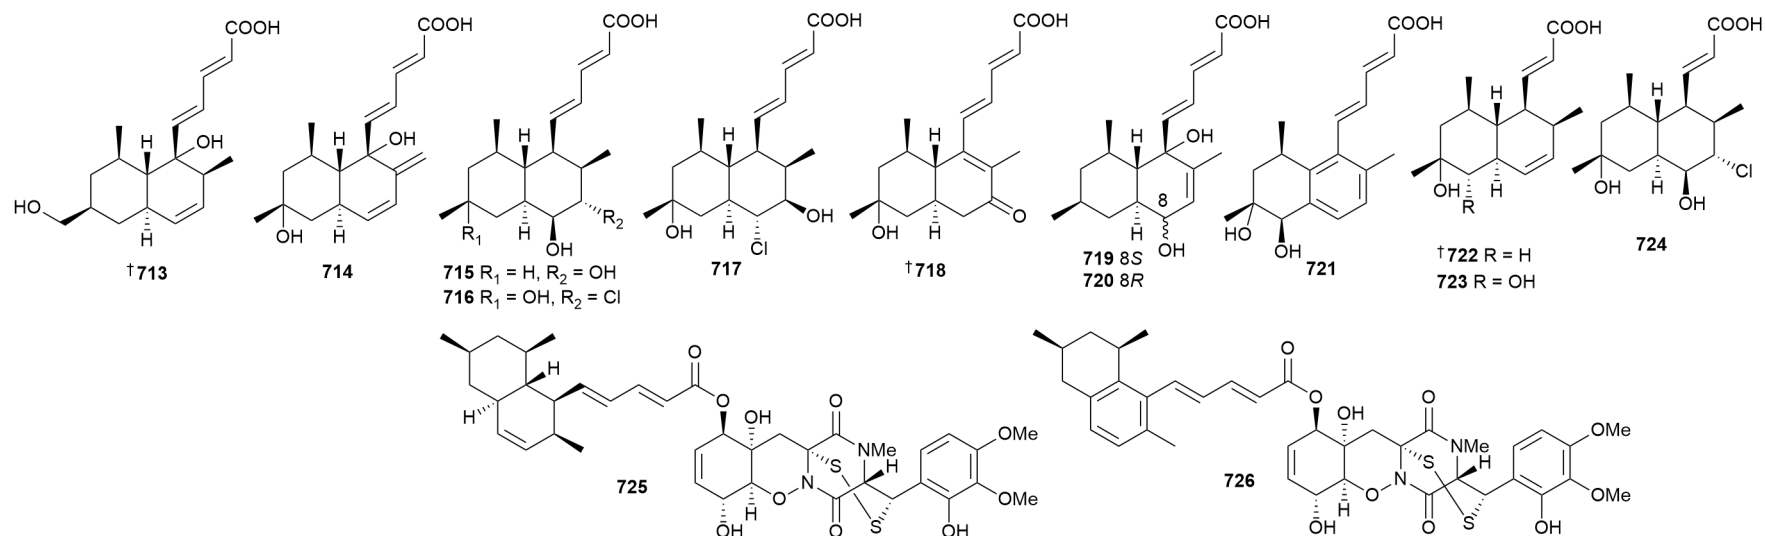

235 Ascomycota *Penicillium* sp // (bivalve mollusc, *Bathymodiolus* sp.) South China Sea // Tanzawaic acids from a deep-sea derived *Penicillium* species

- 713 // N // penitanzacid A // IA vs 1 HTCL; IA vs 4 bact. strains; IA vs 1 fungus.  
 714 // N // penitanzacid B // IA vs 1 HTCL; IA vs 4 bact. strains; IA vs 1 fungus.  
 715 // N // penitanzacid C // IA vs 1 HTCL; IA vs 4 bact. strains; IA vs 1 fungus.  
 716 // N // penitanzacid D // IA vs 1 HTCL; IA vs 4 bact. strains; IA vs 1 fungus.  
 717 // N // penitanzacid E // IA vs 1 HTCL; IA vs 4 bact. strains; IA vs 1 fungus.  
 718 // N // penitanzacid F // IA vs 1 HTCL; IA vs 4 bact. strains; IA vs 1 fungus.  
 719 // M // tanzawaic acid I // IA vs 1 HTCL; IA vs 4 bact. strains; IA vs 1 fungus.  
 720 // M // tanzawaic acid J // IA vs 1 HTCL; IA vs 4 bact. strains; IA vs 1 fungus.  
 721 // N // penitanzacid G // IA vs 1 HTCL; IA vs 4 bact. strains; IA vs 1 fungus.  
 722 // N // penitanzacid H // IA vs 1 HTCL; IA vs 4 bact. strains; IA vs 1 fungus.  
 723 // N // penitanzacid I // IA vs 1 HTCL; IA vs 4 bact. strains; IA vs 1 fungus.  
 724 // N // penitanzacid J // IA vs 1 HTCL; IA vs 4 bact. strains; IA vs 1 fungus.  
 725 // N // hatsusamide C // IA vs 1 HTCL; IA vs 4 bact. strains; IA vs 1 fungus.  
 726 // N // hatsusamide D // IA vs 1 HTCL; IA vs 4 bact. strains; IA vs 1 fungus.

Key: Main article bibliography reference // Taxonomy // Location // Article title

Compound number // Status // Compound name // Biological activity and Other information

## 2 Marine microorganisms and phytoplankton:

## 2.3 Marine-sourced fungi (excluding from mangroves)

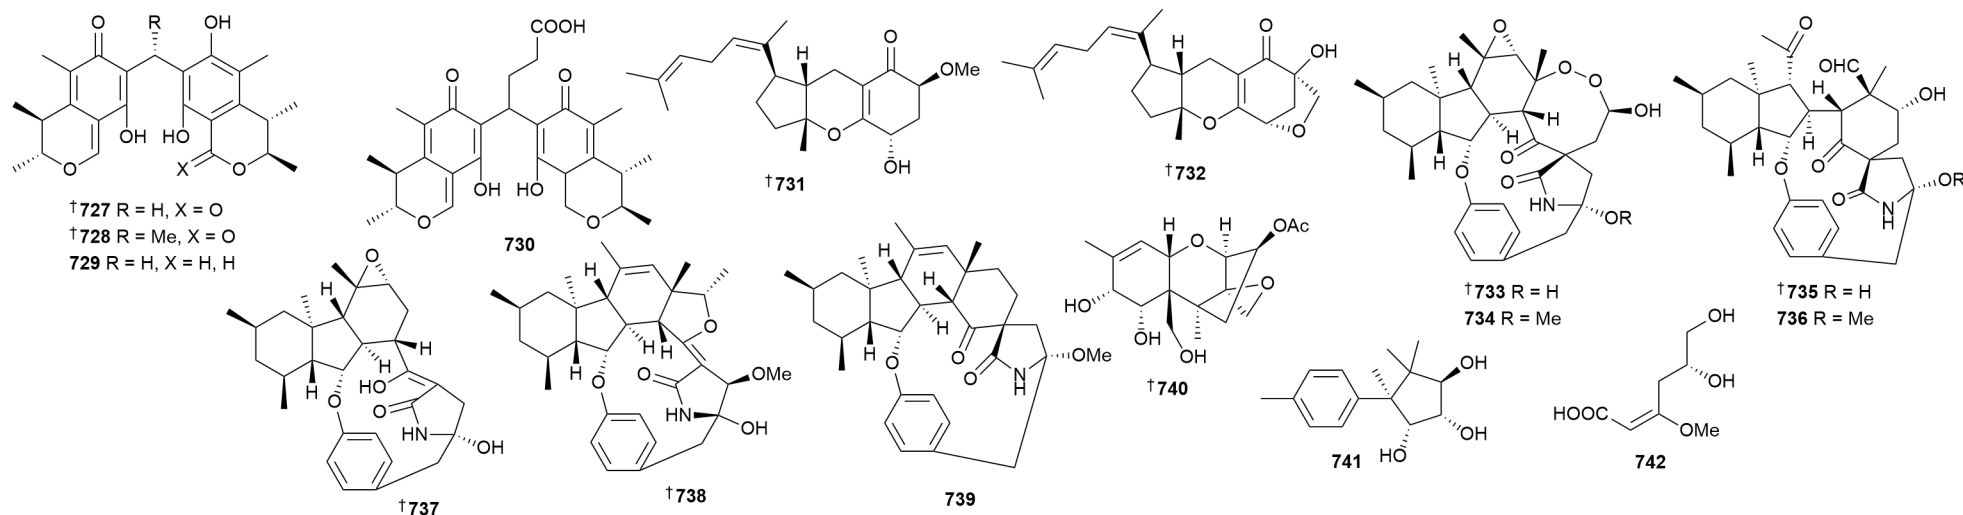

- 236** Ascomycota *Penicillium* sp // (unspecified starfish) South China Sea // Rare carbon-bridged citrinin dimers from the starfish-derived symbiotic fungus *Penicillium* sp. GGF16-1-2  
**727** // N // dicitrinone G // IA vs 2 HTCLs; weak activ. vs 1 fungus.  
**728** // N // dicitrinone H // IA vs 2 HTCLs; weak activ. vs 1 fungus.  
**729** // N // dicitrinone I // IA vs 2 HTCLs; weak activ. vs 1 fungus.  
**730** // N // dicitrinone J // IA vs 2 HTCLs; weak activ. vs 1 fungus.
- 237** Ascomycota *Penicillium* sp // (sponge, *Crella* sp.) Paracel Islands, Hainan, China // Guignardones Y–Z, antiviral meroterpenes from *Penicillium* sp. NBUF154 associated with a *Crella* sponge from the marine mesophotic zone  
**731** // N // guignardone Y // weak activ. vs 1 virus; IA vs 10 bact. strains.  
**732** // N // guignardone Z // IA vs 1 virus; IA vs 10 bact. strains.
- 238** Ascomycota *Penicillium* sp // (unidentified soft coral) South China Sea // Pyrrospirones K–Q, decahydrofluorene-class alkaloids from the marine-derived fungus *Penicillium* sp. SCSIO 41512  
**733** // N // pyrrospirone K // IA vs 1 HTCL; IA vs 6 bact. strains; IA vs 5 PTPs.  
**734** // N // pyrrospirone L // IA vs 1 HTCL; IA vs 6 bact. strains; IA vs 5 PTPs.  
**735** // N // pyrrospirone M // IA vs 1 HTCL; IA vs 6 bact. strains; IA vs 5 PTPs.  
**736** // N // pyrrospirone N // NT vs 1 HTCL; IA vs 6 bact. strains; IA vs 5 PTPs.  
**737** // N // pyrrospirone O // IA vs 1 HTCL; IA to weak activ. vs 6 bact. strains; NT vs 5 PTPs.  
**738** // N // pyrrospirone P // IA vs 1 HTCL; NT vs 6 bact. strains; IA vs 5 PTPs.  
**739** // N // pyrrospirone Q // NT vs 1 HTCL; IA vs 6 bact. strains; NT vs 5 PTPs.
- 239** Ascomycota *Penicillium* sp // (sediment) South Atlantic // New cytotoxic secondary metabolites from two deep-sea-derived fungi and the co-culture impact on the secondary metabolic patterns  
**740** // N // (2*S*,3*S*,5*S*,6*S*,7*S*,8*R*,11*S*,12*R*)-15-deacetyl-7,8-dihydroxycalonectrin // IA vs 3 HTCLs.  
**741** // N // 1-methyl-4-[3,4,5-trihydroxy-1,2,2-trimethylcyclopentyl]benzene // IA vs 3 HTCLs.  
**742** // N // 5,6-dihydroxy-3-methoxyhex-2-enoic acid // IA vs 3 HTCLs.

Key: Main article bibliography reference // Taxonomy // Location // Article title

Compound number // Status // Compound name // Biological activity and Other information

2 Marine microorganisms and phytoplankton:

2.3 Marine-sourced fungi (excluding from mangroves)

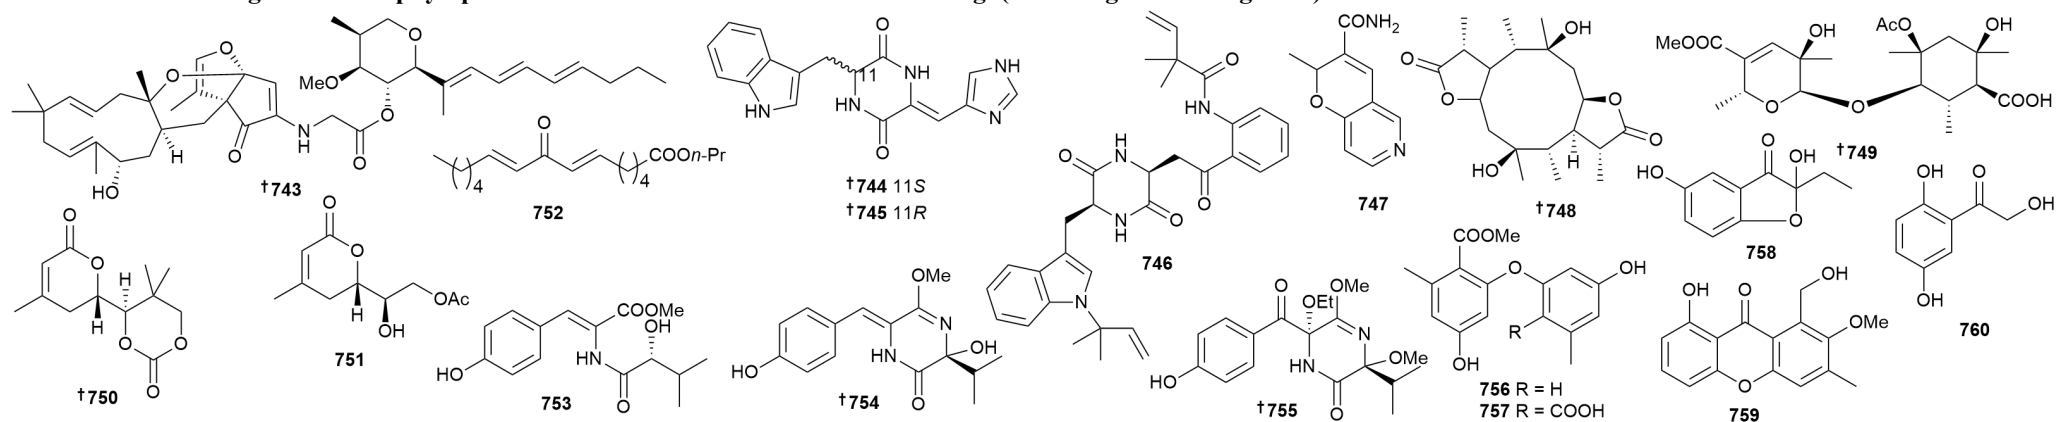

- 240** Ascomycota *Penicillium* sp // (sediment) Karachi, Sindh, Pakistan // Antiglioma natural products from the marine-associated fungus *Penicillium* sp. ZZ1750  
**743** // N // penipyridinone B // IA to weak cytotox. vs 2 HTCLs.  
**744** // N // 11S(-)-penilloid A // IA vs 2 HTCLs.  
**745** // N // 11R,14E-(+)-penilloid A // IA vs 2 HTCLs.
- 241** Ascomycota *Penicillium* sp // (sediment) Kueishantao hydrothermal vents, Taiwan // Two new alkaloids from the marine-derived fungus *Penicillium* sp. LSH-3-1  
**746** // N // peniokaramine // IA vs 1 HTCL; IA vs NO prod.  
**747** // N // penipyranopyridine // IA vs 1 HTCL; IA vs NO prod.
- 242** Ascomycota *Pestalotiopsis* sp // (unspecified sponge) Weizhou Island, Guangxi province, China // Anti-inflammatory polyketide derivatives from the sponge-derived fungus *Pestalotiopsis* sp. SWMU-WZ04-2  
**748** // N // pestaloketide A // IA vs 4 HTCLs; IA vs NO prod.  
**749** // N // pestaloketide B // IA vs 4 HTCLs; IA vs NO prod.  
**750** // N // pestaloketide C // IA vs 4 HTCLs; IA vs NO prod.  
**751** // N // pestaloketide D // IA vs 4 HTCLs; IA vs NO prod.  
**752** // N // pestaloketide E // IA vs 4 HTCLs; IA vs NO prod.
- 243** Ascomycota *Phoma herbarum* // (unidentified sponge) Shenzhen, Guangdong Province, China // Tyrosine and tereazine derivatives from the marine-sponge-derived fungus *Phoma herbarum* YG5839  
**753** // N // phomarosine D // IA vs 3 fungal strains.  
**754** // N // tereazine N // IA vs 3 fungal strains.  
**755** // N // tereazine O // IA vs 3 fungal strains.
- 244** Ascomycota *Pseudopithomyces maydicus* // (bryozoan, *Schizoporella* sp.) Phuket Province, Thailand // New aromatic polyketides from the marine-derived fungus *Pseudopithomyces maydicus* PSU-AMF350 and their antimicrobial activity  
**756** // N // pseudopithoether A // IA vs 6 bact. strains; IA vs 6 fungal strains.  
**757** // N // pseudopithoether B // IA vs 6 bact. strains; IA vs 6 fungal strains.  
**758** // N // pseudopithonone // IA vs 6 bact. strains; IA vs 6 fungal strains.  
**759** // N // pseudopithoxanthone // IA vs 6 bact. strains; IA vs 6 fungal strains.  
**760** // N //  $\alpha$ ,2,5-trihydroxyacetophenone // IA vs 6 bact. strains; IA vs 6 fungal strains.

Key: Main article bibliography reference // Taxonomy // Location // Article title

Compound number // Status // Compound name // Biological activity and Other information

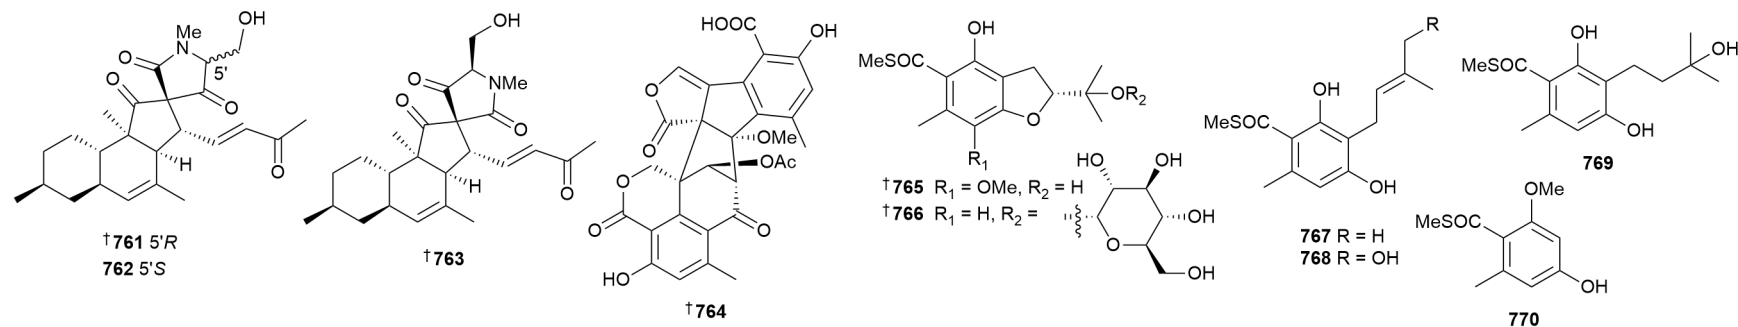

- 245** Ascomycota *Pyrenochaetopsis* sp // (brown alga, *Fucus vesiculosus*) Falckenstein Beach, Kiel Fjord, Baltic Sea, Germany // Application of feature-based molecular networking for comparative metabolomics and targeted isolation of stereoisomers from algaliculous fungi  
**761** // R // pyrenosetin C // NT.  
**762** // N // pyrenosetin E // IA vs 5 HTCLs and 1 nHCL.  
**763** // N // pyrenosetin F // IA vs 5 HTCLs and 1 nHCL.
- 246** Ascomycota *Talaromyces* sp // (unspecified sponge) Prydz Bay, Antarctica // Talaverrucin A, heterodimeric oxaphenalenone from Antarctica sponge-derived fungus *Talaromyces* sp. HDN151403, inhibits Wnt/ $\beta$ -Catenin signaling pathway  
**764** // N // talaverrucin A // weak inhib. Wnt/ $\beta$ -catenin pathway (zebrafish); IA vs 13 HTCLs.
- 247** Ascomycota *Talaromyces indigoticus*, Ascomycota *Penicillium indigoticum* // (sediment) South China Sea // Thioester-containing benzoate derivatives with  $\alpha$ -glucosidase inhibitory activity from the deep-sea-derived fungus *Talaromyces indigoticus* FS688  
**765** // N // eurothiocin C // weak inhib.  $\alpha$ -glucosidase.  
**766** // N // eurothiocin D // IA vs  $\alpha$ -glucosidase.  
**767** // N // eurothiocin E // IA vs  $\alpha$ -glucosidase.  
**768** // N // eurothiocin F // IA vs  $\alpha$ -glucosidase.  
**769** // N // eurothiocin G // IA vs  $\alpha$ -glucosidase.  
**770** // N // eurothiocin H // IA vs  $\alpha$ -glucosidase.

2 Marine microorganisms and phytoplankton:

2.3 Marine-sourced fungi (excluding from mangroves)

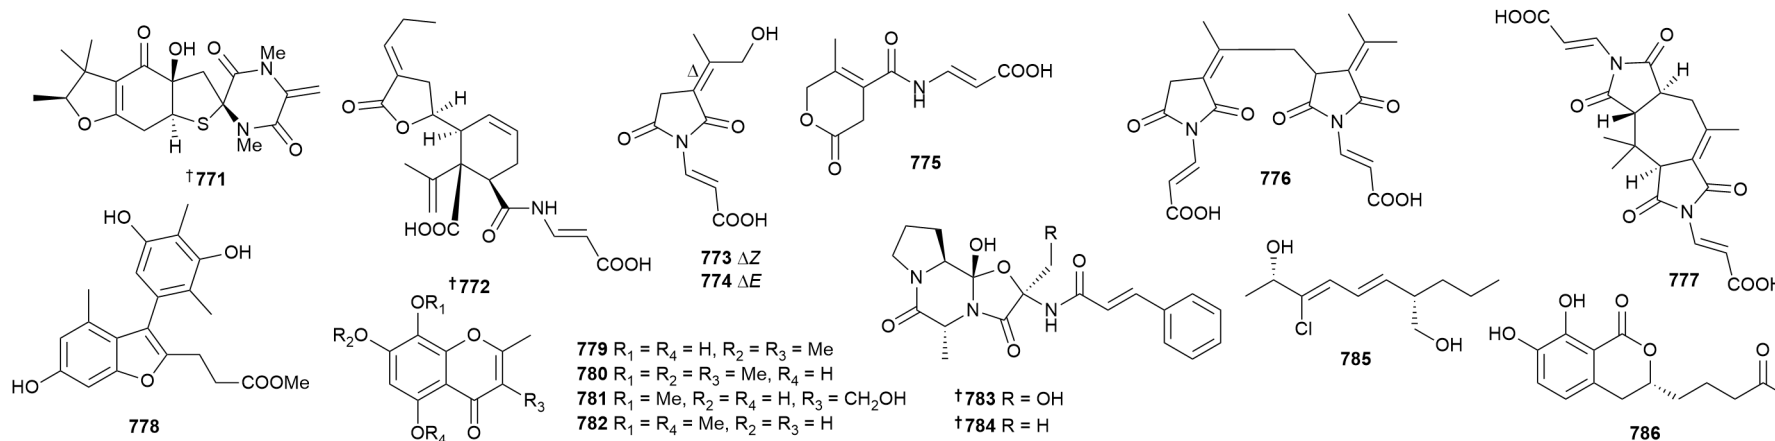

- 248** Ascomycota *Talaromyces mangshanicus* // (sediment) South China Sea // New secondary metabolites from the marine-derived fungus *Talaromyces mangshanicus* BTBU20211089  
**771** // N // talaromanloid A // IA vs 2 bact. strains; IA vs 1 fungus.  
**772** // N // talaromydene // IA vs 2 bact. strains; IA vs 1 fungus.  
**773** // N // 10-hydroxydemethyltalaromydine // IA vs 2 bact. strains; IA vs 1 fungus.  
**774** // N // 11-hydroxydemethyltalaromydine // IA vs 2 bact. strains; IA vs 1 fungus.  
**775** // N // talaromylectone // IA vs 2 bact. strains; IA vs 1 fungus.  
**776** // N // ditalaromylectone A // IA vs 2 bact. strains; IA vs 1 fungus.  
**777** // N // ditalaromylectone B // IA vs 2 bact. strains; IA vs 1 fungus.
- 249** Ascomycota *Talaromyces minioluteus* // (mussel, *Gigantidas platifrons*) South China Sea // Aromatic polyketides from the deep-sea cold-seep mussel associated endozoic fungus *Talaromyces minioluteus* CS-138  
**778** // N // talarominine A // IA to weak activ. vs 12 bact. strains; IA vs antioxid. (DPPH).  
**779** // N // talamin A // IA to weak activ. vs 12 bact. strains; weak inhib. vs antioxid. (DPPH).  
**780** // N // talamin B // IA vs 12 bact. strains; IA vs antioxid. (DPPH).  
**781** // N // talamin C // IA vs 12 bact. strains; IA vs antioxid. (DPPH).  
**782** // N // talamin D // IA vs 12 bact. strains; weak inhib. antioxid. (DPPH).
- 250** Ascomycota *Talaromyces purpureogenus* // (red alga, *Grateloupia filicina*) Zhoushan, Zhejiang province, China // Talaropeptins A and B, tripeptides with an *N-trans*-cinnamoyl moiety from the marine-derived fungus *Talaromyces purpureogenus* CX11  
**783** // N // talaropeptin A // IA vs 12 HTCLs; IA to weak activ. vs 3 fungal strains.  
**784** // N // talaropeptin B // IA vs 12 HTCLs; IA to weak activ. vs 3 fungal strains.
- 251** Ascomycota *Talaromyces* sp // (fish, *Hippoglossus* sp.) Zhoushan Archipelago, China // Talaromydien A and talaroisocoumarin A, new metabolites from the marine-sourced fungus *Talaromyces* sp. ZZ1616  
**785** // N // talaromydien A // IA vs 2 bact. strains; IA vs 1 fungus.  
**786** // N // talaroisocoumarin A // IA to weak activ. vs 2 bact. strains; weak activ. vs 1 fungus.

Key: Main article bibliography reference // Taxonomy // Location // Article title

Compound number // Status // Compound name // Biological activity and Other information

## 2 Marine microorganisms and phytoplankton:

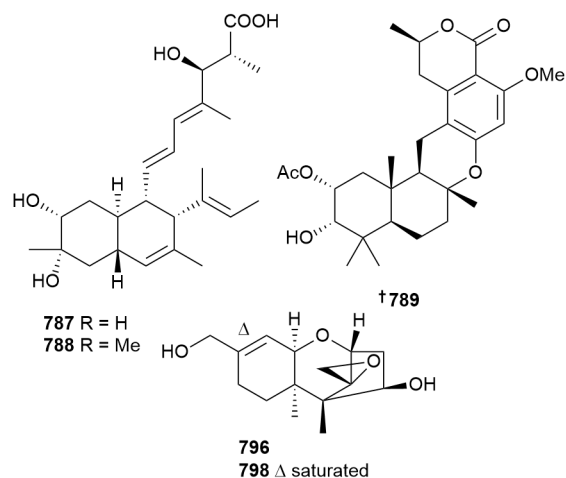

## 2.3 Marine-sourced fungi (excluding from mangroves)

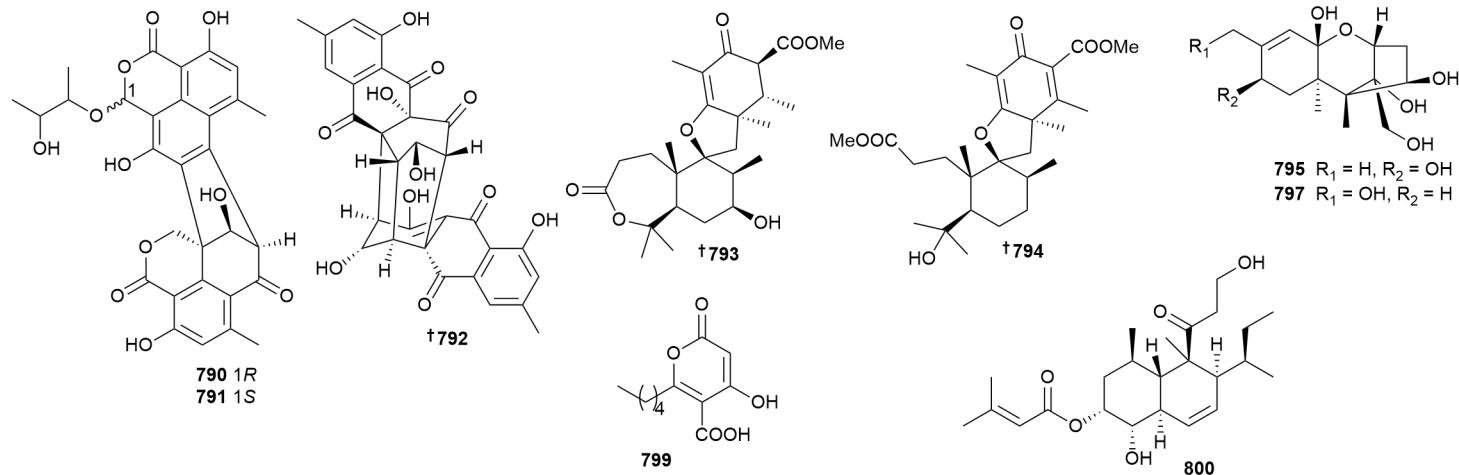

- 252** Ascomycota *Talaromyces* sp // (sediment) Zhoushan, Zhejiang, P. R. China // Two new cytotoxic decalin derivatives from marine-derived fungus *Talaromyces* sp.  
787 // N // fusarielin O // IA vs 3 HTCLs; IA vs antioxid. (DPPH).  
788 // N // fusarielin P // IA vs 3 HTCLs; IA vs antioxid. (DPPH).
- 253** Ascomycota *Talaromyces* sp // (seawater) Dongshan Island, Fujian Province, China // Characterization of a bioactive meroterpenoid isolated from the marine-derived fungus *Talaromyces* sp.  
789 // N // taladrimanin A // IA vs 2 HTCLs; IA to weak activ. vs 4 bact. strains.
- 254** Ascomycota *Talaromyces* sp // (sediment) Yellow Sea in Qingdao, China // New antibacterial secondary metabolites from a marine-derived *Talaromyces* sp. strain BTBU20213036  
790 // N // bacillisporin K // IA to weak activ. vs 2 bact. strains; IA vs 1 fungus.  
791 // N // bacillisporin M // IA to weak activ. vs 2 bact. strains; IA vs 1 fungus.  
792 // N // rugulosin D // IA vs 2 bact. strains; IA vs 1 fungus.
- 255** Basidiomycota *Trametes* sp // (unidentified sea snail) Silver Island, Xisha, South Sea, China // Meroterpenoids and steroids from the marine-derived fungus *Trametes* sp. ZYX-Z-16  
793 // N // asnovolin H // IA vs 4 bact. strains; IA vs 5 fungal strains; IA vs  $\alpha$ -glucosidase.  
794 // N // asnovolin I // IA vs 4 bact. strains; IA vs 5 fungal strains; IA vs  $\alpha$ -glucosidase.
- 256** Ascomycota *Trichoderma brevicompactum* // (red alga, *Mastophora rosea*) Yilan coast, Taiwan // New trichothecenes isolated from the marine algicolous fungus *Trichoderma brevicompactum*  
795 // N // trichoderminol B // IA vs 3 HTCLs; weak inhib. NO prod.  
796 // N // trichoderminol C // IA vs 3 HTCLs; weak inhib. NO prod.  
797 // N // trichoderminol D // IA vs 3 HTCLs; IA vs NO prod.  
798 // N // trichoderminol E // IA vs 3 HTCLs; weak inhib. NO prod.
- 257** Ascomycota *Trichoderma harzianum* // (unidentified tunicate) Phuket Province, Thailand //  $\alpha$ -Pyrone and decalin derivatives from the marine-derived fungus *Trichoderma harzianum* PSU-MF79  
799 // N // trichoharzianone // IA vs 6 bact. strains; IA vs 4 fungal strains.  
800 // N // trichoharzianin // IA vs 6 bact. strains; IA vs 4 fungal strains.

**Key:** Main article bibliography reference // Taxonomy // Location // Article title

Compound number // Status // Compound name // Biological activity and Other information

2 Marine microorganisms and phytoplankton: 2.3 Marine-sourced fungi (excluding from mangroves)

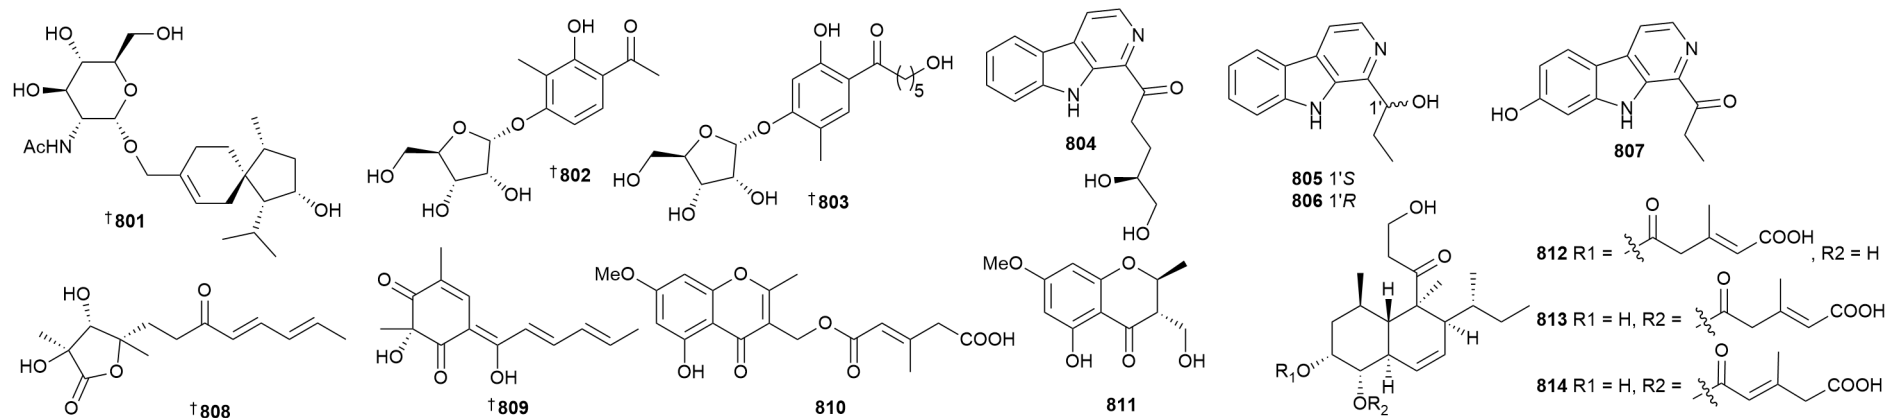

- 258** Ascomycota *Trichoderma longibrachiatum* // (red alga, *Laurencia obtusa*) Qingdao, China // Sesquiterpene and sorbicillinoid glycosides from the endophytic fungus *Trichoderma longibrachiatum* EN-586 derived from the marine red alga *Laurencia obtusa*  
**801** // N // trichoacorside A // IA to mod. activ. vs 6 bact. strains; IA to weak activ. vs 11 fungi.  
**802** // N // sorbicillinide A // IA to mod. activ. vs 6 bact. strains; IA to weak activ. vs 11 fungi.  
**803** // N // sorbicillinide B // IA to mod. activ. vs 6 bact. strains; IA to mod. activ. vs 11 fungi.
- 259** Ascomycota *Trichoderma* sp // (seawater) South China Sea //  $\beta$ -Carboline alkaloids from the deep-sea fungus *Trichoderma* sp. MCCC 3A01244 as a new type of anti-pulmonary fibrosis agent that inhibits TGF- $\beta$ /Smad signaling pathway  
**804** // N // trichocarboline A // weak inhib. TGF- $\beta$ 1.  
**805** // N // (-)-trichocarboline B // IA vs TGF- $\beta$ 1.  
**806** // N // (+)-trichocarboline B // IA vs TGF- $\beta$ 1.  
**807** // N // trichocarboline C // NT vs TGF- $\beta$ 1.
- 260** Ascomycota *Trichoderma* sp // (sediment) Hanauma bay, Hawaii // New and bioactive polyketides from Hawaiian marine-derived fungus *Trichoderma* sp. FM652  
**808** // N // 2,3-dihydro 2-hydroxy vertinolide // IA vs 1 HTCL; IA vs 1 nHCL; IA vs NF- $\kappa$ B; IA vs 3 bact. strains.  
**809** // N // (-)-trichodermatone // IA vs 1 HTCL; IA vs 1 nHCL; NT vs NF- $\kappa$ B; IA vs 3 bact. strains.
- 261** Ascomycota *Trichoderma* sp // (sediment) Kueishantao, Taiwan, China // New polyketides from a hydrothermal vent sediment fungus *Trichoderma* sp. JWM29-10-1 and their antimicrobial effects  
**810** // N // (2E)-1-[(5-hydroxy-7-methoxy-2-methyl-4-oxo-4H-1-benzopyran-3-yl)methyl]3-methyl-2-pentenedioate // IA to mod. activ. vs 15 bact. strains; IA to weak activ. vs 3 fungal strains.  
**811** // N // (2S,3S)-5-hydroxy-3-hydroxymethyl-7-methoxy-2-methyl-4-chromanone // IA to mod. activ. vs 15 bact. strains; IA vs 3 fungal strains.  
**812** // N // tandyukisin G // IA vs 15 bact. strains; IA vs 3 fungal strains.  
**813** // N // tandyukisin H // IA vs 15 bact. strains; IA vs 3 fungal strains.  
**814** // N // tandyukisin I // IA vs 15 bact. strains; IA vs 3 fungal strains.

Key: Main article bibliography reference // Taxonomy // Location // Article title

Compound number // Status // Compound name // Biological activity and Other information



2 Marine microorganisms and phytoplankton:

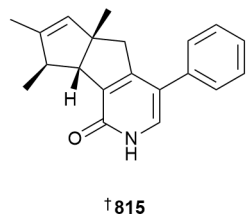

2.3 Marine-sourced fungi (excluding from mangroves)

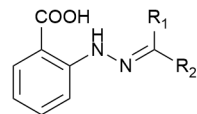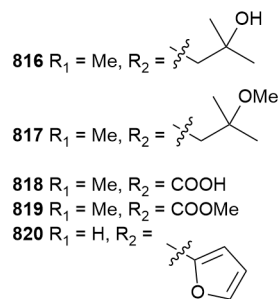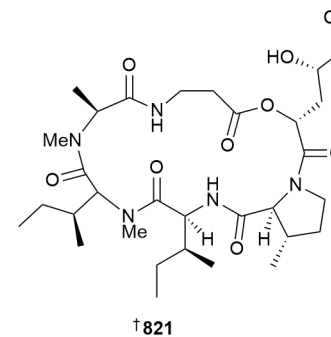

- 3 Ascomycota *Penicillium* // // DU8ML: machine learning-augmented density functional theory nuclear magnetic resonance computations for high-throughput *in silico* solution structure validation and revision of complex alkaloids  
**815** // R // tersone E/citridone A // NT.
- 262 Ascomycota *Penicillium panenum* // // Structure revision of penipacids A–E reveals a putative new cryptic natural product, *N*-aminoanthranilic acid, with potential as a transcriptional regulator of silent secondary metabolism  
**816** // R // penipacid A // NT.  
**817** // R // penipacid B // NT.  
**818** // R // penipacid C // NT.  
**819** // R // penipacid D // NT.  
**820** // R // penipacid E // NT.
- 263 Ascomycota *Trichothecium roseum* // // Structure revision of trichomide D by total synthesis  
**821** // R // trichomide D // NT.

2 Marine microorganisms and phytoplankton: 2.4 Fungi from mangroves

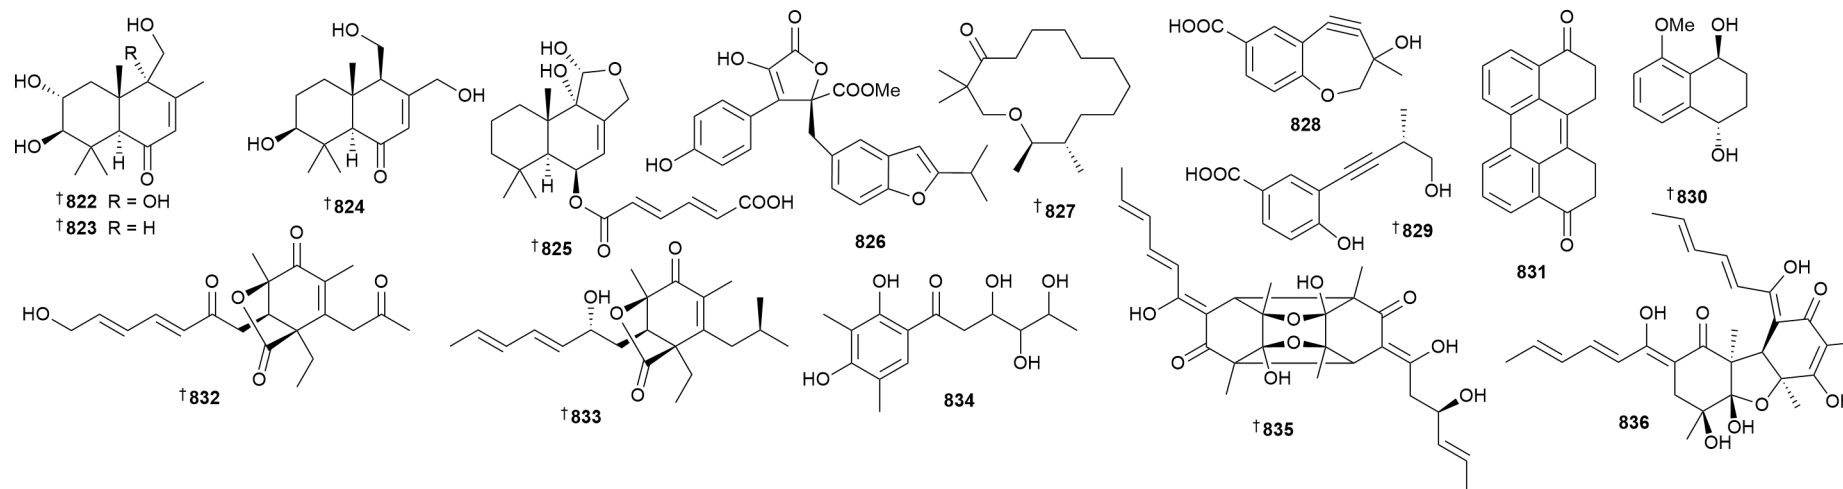

- 296** Ascomycota *Aspergillus* sp // (sediment, *Bruguiera gymnorrhiza*) Wenchang, China // Sesquiterpenoids from the mangrove-derived *Aspergillus ustus* 094102  
**822** // N // ustusol F // IA vs 29 HTCLs; IA vs 1 nMCL; IA vs 12 bact. strains.  
**823** // N // 9-deoxyustusol F // IA vs 29 HTCLs; IA vs 1 nMCL; IA vs 12 bact. strains.  
**824** // N // ustusol G // IA vs 29 HTCLs; IA vs 1 nMCL; IA vs 12 bact. strains.  
**825** // N // ustusolate H // IA vs 29 HTCLs; IA vs 1 nMCL; IA vs 12 bact. strains.
- 297** Ascomycota *Aspergillus terreus* // (pneumatophores, *Acanthus illicifolius*) Mandapam, Tamil Nadu, India // Investigation of secondary metabolites from marine-derived fungi *Aspergillus*  
**826** // N // aspernolide Q // NT.
- 298** Ascomycota *Daldinia eschscholtzii* // (sediment, *Pluchea indica*) Zhanjiang Mangrove National Nature Reserve, Guangdong Province, China // Diversified polyketides with anti-inflammatory activities from mangrove endophytic fungus *Daldinia eschscholtzii* KBJYZ-1  
**827** // N // eschscholin B // IA vs anti-inflam.  
**828** // N // dalditone A // IA vs anti-inflam.  
**829** // N // dalditone B // IA vs anti-inflam.  
**830** // N // (1*R*, 4*R*)-5-methoxy-1,4-dihydroxy-1,2,3,4-tetrahydronaphthalene // IA vs anti-inflam.  
**831** // N // daldilene A // IA vs anti-inflam.
- 299** Ascomycota *Hypocrea jecorina* // (sediment, unidentified mangrove) Zhangjiangkou Mangrove National Nature Reserve, Fujian province, China // New sorbicillinoids with tea pathogenic fungus inhibitory effect from marine-derived fungus *Hypocrea jecorina* H8  
**832** // N // trichodermolide C // IA vs 1 fungal strain.  
**833** // N // trichodermolide D // IA vs 1 fungal strain.  
**834** // N // 1-(2,4-dihydroxy-3,5-dimethylphenyl)-3,4,5-trihydroxyhexan-1-one // IA vs 1 fungal strain.  
**835** // N // 7,7',9'-hydroxy-trichodimerol // IA vs 1 fungal strain.  
**836** // N // isobisvertinol A // Weak activ. vs 1 fungal strain.

Key: Main article bibliography reference // Taxonomy // Location // Article title

Compound number // Status // Compound name // Biological activity and Other information

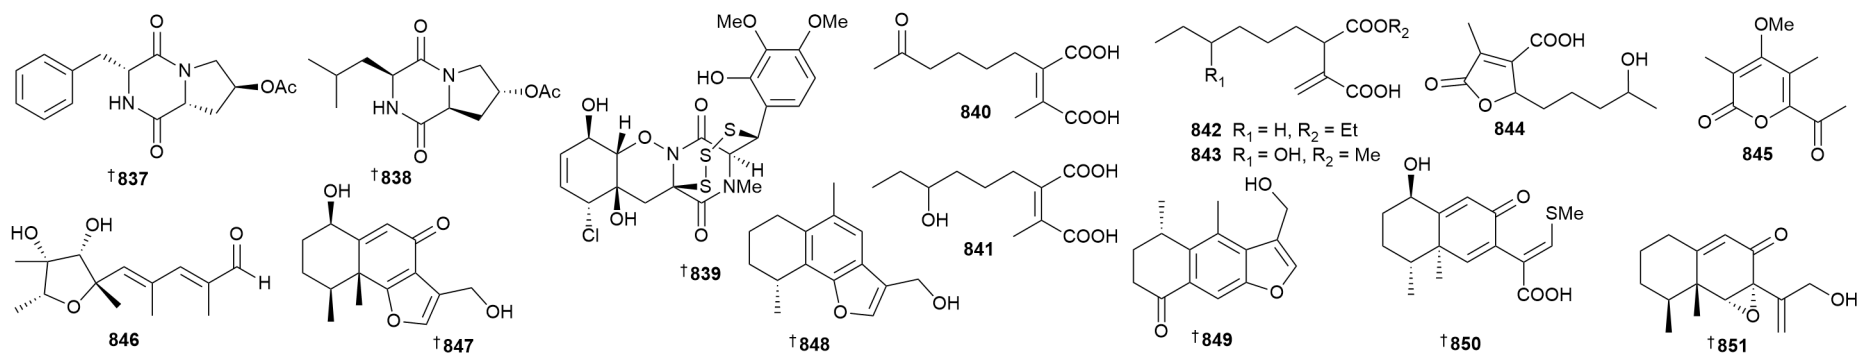

- 300** Ascomycota *Nigrospora camelliae-sinensis* // (sediment, *Lumnitzera littorea*) Tielu harbour mangrove natural reserve area, Hainan Island, China // Two new 2,5-diketopiperazine derivatives from mangrove-derived endophytic fungus *Nigrospora camelliae-sinensis* S30  
**837** // N // nigrosporaamide A // IA vs 5 bact. strains; IA vs 4 fungal strain; IA vs neuroprotection.  
**838** // N // nigrosporaamide B // IA vs 5 bact. strains; IA vs 4 fungal strain; IA vs neuroprotection.
- 301** Ascomycota *Penicillium ludwigii* // (sediment, unidentified mangrove) Hongsha River estuary, Sanya, Hainan Island, China // Thiodiketopiperazines and alkane derivatives produced by the mangrove sediment-derived fungus *Penicillium ludwigii* SCSIO 41408  
**839** // N // adametizine C // IA vs 2 HTCLs; IA vs 2 bact. strains; IA vs 2 fungal strains; weak activ. vs anti-inflam.  
**840** // N // 2-methyl-3-(5-oxo-hexyl) maleic acid // IA vs 2 HTCLs; IA vs 2 bact. strains; IA vs 2 fungal strains; IA vs anti-inflam.  
**841** // N // 2-(4-hydroxyhexyl)-3-methylmaleic acid // IA vs 2 HTCLs; IA vs 2 bact. strains; IA vs 2 fungal strains; IA vs anti-inflam.  
**842** // N // 3-(ethoxycarbonyl)-2-methylenenonanoic acid // IA vs 2 HTCLs; IA vs 2 bact. strains; IA vs 2 fungal strains; IA vs anti-inflam.  
**843** // N // 7-hydroxy-3-(methoxycarbonyl)-2-methylenenonanoic acid // IA vs 2 HTCLs; IA vs 2 bact. strains; IA vs 2 fungal strains; IA vs anti-inflam.  
**844** // N // 2-(4-hydroxypentyl)-4-methyl-5-oxo-2,5-dihydrofuran-3-carboxylic acid // IA vs 2 HTCLs; IA vs 2 bact. strains; IA vs 2 fungal strains; IA vs anti-inflam.
- 302** Ascomycota *Penicillium polonicum* // (sediment, unidentified mangrove) Zhangjiangkou, Fujian, China // Two new compounds from a mangrove sediment-derived fungus *Penicillium polonicum* H175  
**845** // N // 6-acetyl-4-methoxy-3,5-dimethyl-2H-pyran-2-one // IA vs hypoglycaemic effect.  
**846** // N // (2E,4E)-5-((2S,3S,4R,5R)-3,4-dihydroxy-2,4,5-trimethyltetrahydrofuran-2-yl)-2,4-dimethylpenta-2,4-dienal // IA vs hypoglycaemic effect.
- 303** Ascomycota *Penicillium* sp // (sediment unidentified mangrove) Wenchang, China // Citreobenzofuran D–F and phomenone A–B: five novel sesquiterpenoids from the mangrove-derived fungus *Penicillium* sp. HDN13-494  
**847** // N // citreobenzofuran D // IA vs 5 HTCLs; IA vs 5 bact. strains; IA vs 1 fungal strain.  
**848** // N // citreobenzofuran E // IA vs 5 HTCLs; IA vs 5 bact. strains; IA vs 1 fungal strain.  
**849** // N // citreobenzofuran F // IA vs 5 HTCLs; IA vs 5 bact. strains; IA vs 1 fungal strain.  
**850** // N // phomenone A // IA vs 5 HTCLs; IA vs 5 bact. strains; IA vs 1 fungal strain.  
**851** // N // phomenone B // IA vs 5 HTCLs; IA to mod activ. vs 5 bact. strains; IA vs 1 fungal strain.

2 Marine microorganisms and phytoplankton: 2.4 Fungi from mangroves

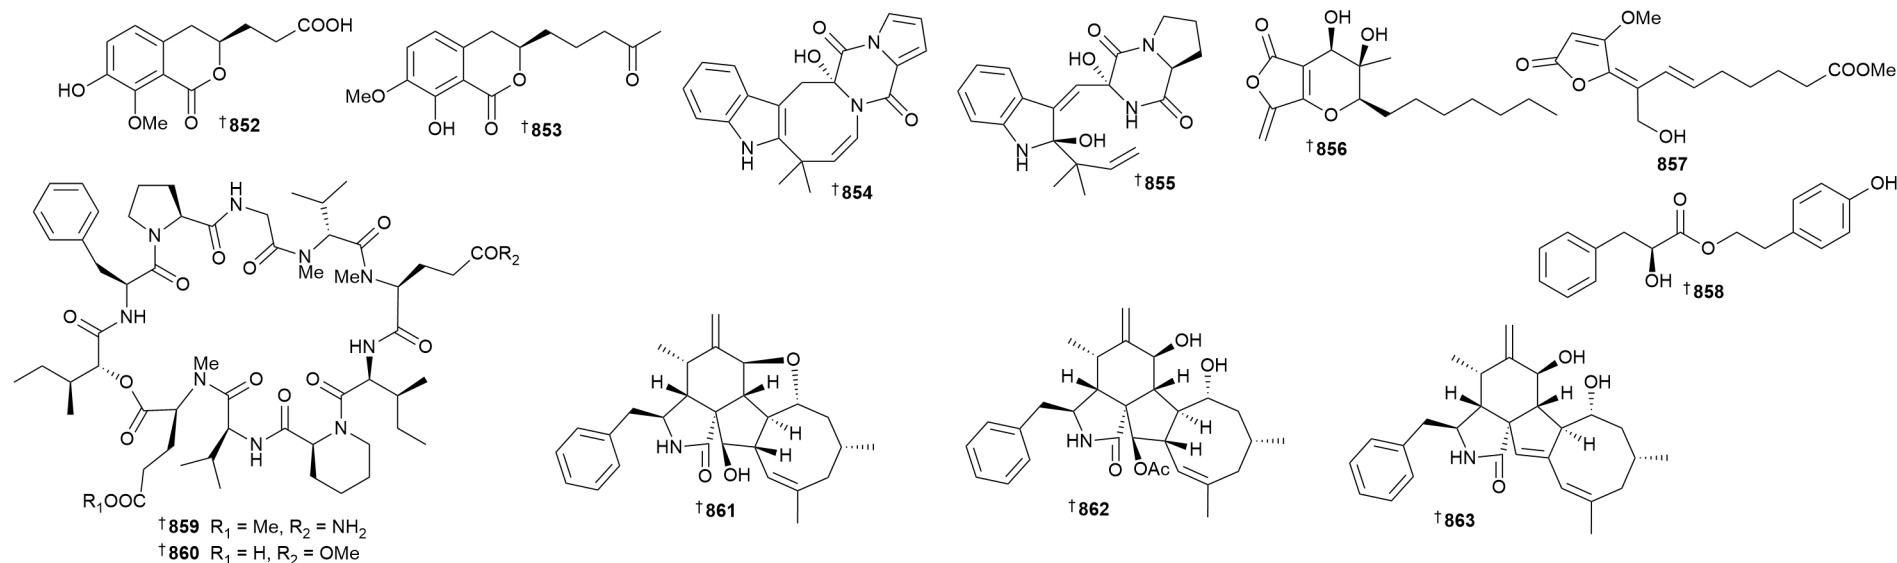

- 304** Ascomycota *Penicillium* sp // (root, *Xylocarpus granatum*) Sanya Tielugang Mangrove Nature Reserve, Hainan Province, China // Bioactive isocoumarins isolated from a mangrove-derived fungus *Penicillium* sp. MGP11  
**852** // N // penicimarin L // IA vs antioxid.  
**853** // N // penicimarin M // IA vs antioxid.
- 305** Ascomycota *Penicillium* sp // (sediment, unidentified mangrove) Beilun Estuary, Fangchenggang, Guangxi, China // New prenylated indole diketopiperazine alkaloids and polyketides from the mangrove-derived fungus *Penicillium* sp  
**854** // N // penicilamide A // IA vs 2 HTCL; IA vs 1 MTCL.  
**855** // N // penicilamide B // IA vs 2 HTCL; IA vs 1 MTCL.  
**856** // N // penicinone A // IA to weak activ. vs 2 HTCL; IA vs 1 MTCL.  
**857** // N // penicinone B // IA vs 2 HTCL; IA vs 1 MTCL.  
**858** // N // penicinone C // NT.
- 306** Ascomycota *Phaeosphaeriopsis* sp // (sediment, *Bruguiera gymnorrhiza*) Techeng Isle, Zhanjiang, Guangdong Province, China // Phaeosphamides A and B, cytotoxic cyclodecadsipeptides from the mangrove-derived fungus *Phaeosphaeriopsis* sp. S296  
**859** // N // phaeosphamide A // IA to weak activ. vs 5 HTCLs.  
**860** // N // phaeosphamide B // IA vs 5 HTCLs.
- 307** Ascomycota *Phomopsis asparagi* // (roots, *Rhizophora mangle*) Dong Zhai Gang-Mangrove Garden, Hainan Province, China // Immunosuppressive cytochalasins from the mangrove endophytic fungus *Phomopsis asparagi* DHS-48  
**861** // N // phomoparagin A // IA vs immunomod; IA vs 1 MTCL.  
**862** // N // phomoparagin B // IA vs immunomod; IA vs 1 MTCL.  
**863** // N // phomoparagin C // IA vs immunomod; IA vs 1 MTCL.

2 Marine microorganisms and phytoplankton: 2.4 Fungi from mangroves

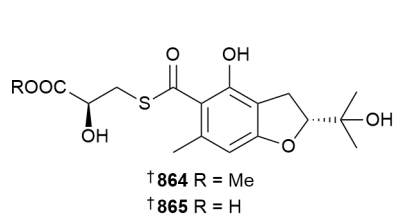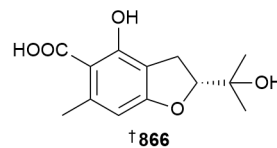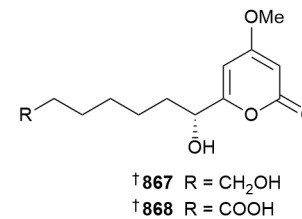

**308** Ascomycota *Talaromyces* sp // (sediment, unidentified mangrove) Yalong Bay, Hainan Province, China. // Sulfur-containing benzofurans and  $\alpha$ -pyrones from the mangrove-derived fungus *Talaromyces* sp. WHUF0341

**864** // N // talarobenzofuran A // IA vs 4 bact. strains; IA vs  $\alpha$ -glucosidase.

**865** // N // talarobenzofuran B // IA vs 4 bact. strains; IA vs  $\alpha$ -glucosidase.

**866** // N // talarobenzofuran C // IA vs 4 bact. strains; IA vs  $\alpha$ -glucosidase.

**867** // N // talaropyrone A // IA vs 4 bact. strains; IA vs  $\alpha$ -glucosidase.

**868** // N // talaropyrone B // IA vs 4 bact. strains; IA vs  $\alpha$ -glucosidase.

## 2 Marine microorganisms of phytoplankton

## 2.5 Dinoflagellates

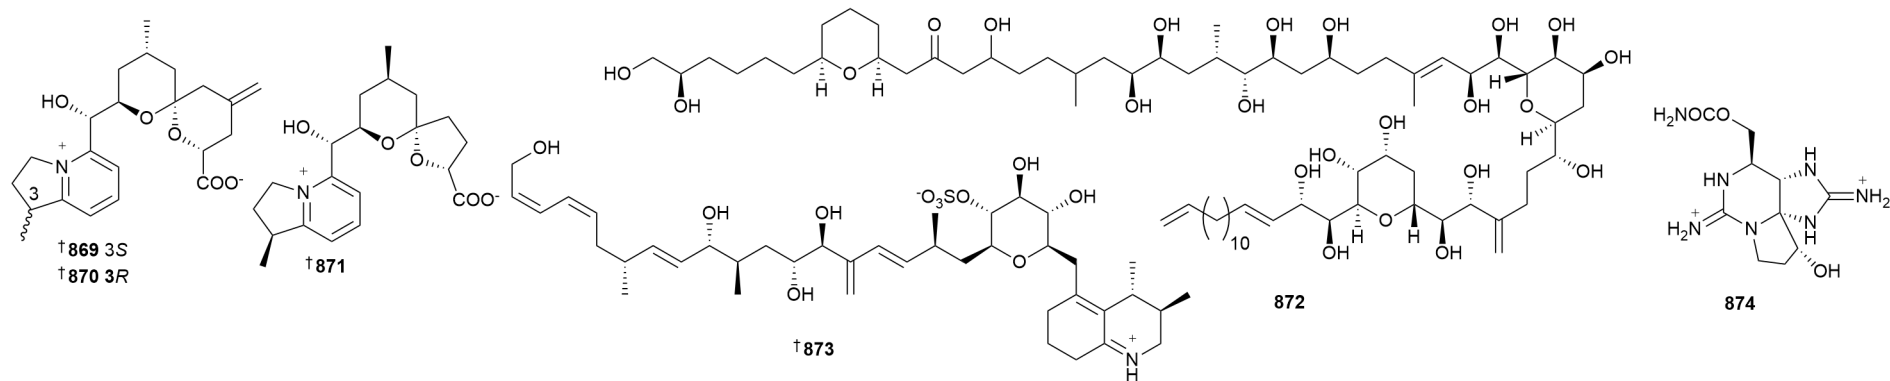

- 309** Miozoa *Effrenium voratum* // Jeju Island, South Korea // Voratins A–C: pyridinium alkaloids from the marine dinoflagellate *Effrenium voratum* with inhibitory effects on biomarkers for benign prostatic hyperplasia  
**869** // N // voratin A // IA to weak cytotox. vs 2 HTCLs; weak inhib. vs type II 5 $\alpha$ -reductase and prostrate specific antigen.  
**870** // N // voratin B // IA vs 2 HTCLs; type II 5 $\alpha$ -reductase and prostrate specific antigen.  
**871** // N // voratin C // IA to weak cytotox. vs 2 HTCLs; weak inhib. vs type II 5 $\alpha$ -reductase and prostrate specific antigen.
- 310** Miozoa *Amphidinium carterae* // Northwest of Ireland // Amphidinol C, a major polyketide from an Irish strain of the dinoflagellate *Amphidinium carterae*  
**872** // N // amphidinol C // weak to mod. activ. vs 2 fungal strains; IA vs 8 bact. strains.
- 311** Miozoa *Ostreopsis ovata* // Kimyong, Jeju Island, South Korea // Ovataline: a polyketide isolated from the benthic dinoflagellate *Ostreopsis cf. ovata* with 5 $\alpha$ -reductase inhibitory activity in RWPE-1 prostatic cells  
**873** // N // ovataline // mod. inhib. vs type II 5 $\alpha$ -reductase; IA vs 1 HTCL.
- 312** Miozoa *Alexandrium pacificum* // Kure, Hiroshima, Japan // First identification of 12 $\beta$ -deoxygonyautoxin 5 (12 $\alpha$ -gonyautoxinol 5) in the cyanobacterium *Dolichospermum circinale* (TA04) and 12 $\beta$ -deoxysaxitoxin (12 $\alpha$ -saxitoxinol) in *D. circinale* (TA04) and the dinoflagellate *Alexandrium pacificum* (Group IV) (120518KureAC)  
**874** // M // 12 $\beta$ -deoxysaxitoxin // NT; synth. from co-isol. metabolite.

### 3 Green Algae

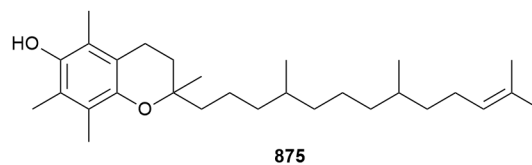

- 327** Chlorophyta *Tetraselmis* sp, Ochrophyta *Nannochloropsis oceanica*, Cyanobacteria *Arthrospira platensis* // Cocos Island, Puntarenas, Costa Rica // 11'- $\alpha$ -Tocomonoenol is the major  $\alpha$ -tocomonoenol isomer in cyanobacteria and microalgae from Costa Rica  
**875** // M // 11'- $\alpha$ -tocomonoenol // Presence confirmed by LCMS/GCMS comparison to standards.

#### 4 Brown algae

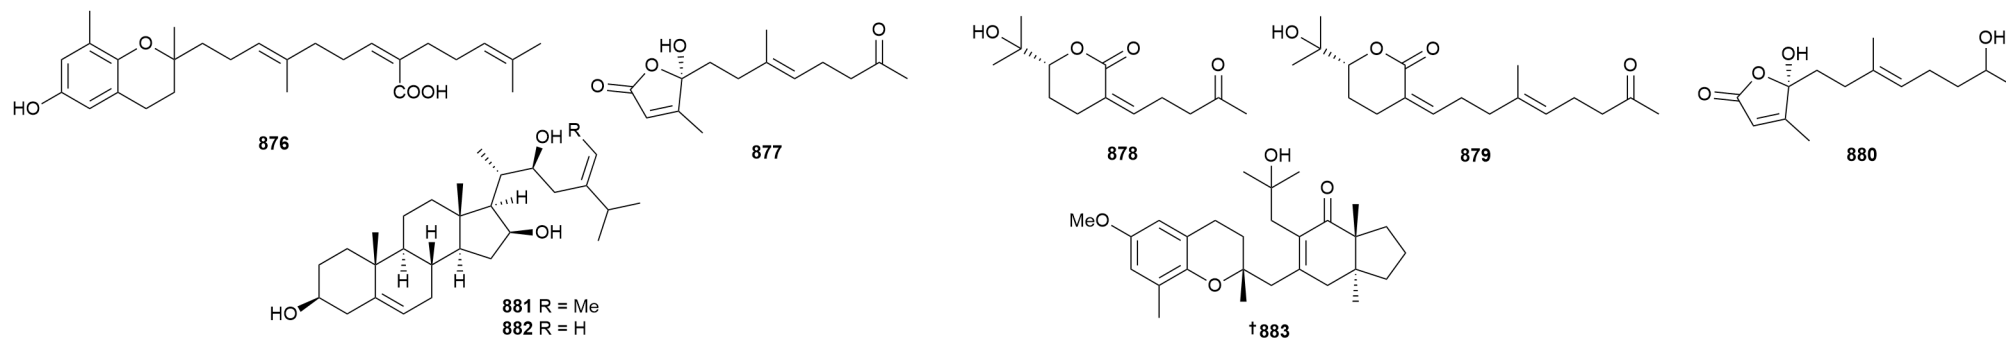

- 333** Ochrophyta *Sargassum macrocarpum* // Tsukumo-wan, Ishikawa Prefecture, Japan // Macrocarquinoid D, new meroterpenoid from brown alga, *Sargassum macrocarpum*  
**876** // N // macrocarquinoid D // IA vs antioxid., IA vs AGE; Isol. as rac.
- 334** Ochrophyta *Sargassum micracanthum* // Udo-myeon, Jeju Island, South Korea // A new butenolide derivative from the brown alga *Sargassum micracanthum*  
**877** // N // sargassumin A // IA vs antioxid.
- 335** Ochrophyta *Sargassum macrocarpum* // Jeju Island, South Korea // New monocyclic terpenoid lactones from a brown alga *Sargassum macrocarpum* as monoamine oxidase inhibitors  
**878** // N // sargassumin A // IA vs monoamine oxidase-A and -B.  
**879** // N // sargassumin B // IA vs monoamine oxidase-A and -B.
- 336** Ochrophyta *Sargassum micracanthum* // Udo-myeon, Jeju Island, South Korea // Sargassumin C, a novel butenolide from *Sargassum micracanthum*  
**880** // N // sargassumin C // IA vs antioxid.
- 337** Ochrophyta *Cystophora xiphocarpa* // Spikey Beach, Tasmania, Australia // Steroids of chemophenetic significance from the Australasian brown alga *Cystophora xiphocarpa*  
**881** // N // (3*S*,16*S*,22*S*,24*E*)-stigmasta-5,24(28)-dien-3,16,22-triol // weak cytotox. vs 1 HTCL.  
**882** // N // (3*S*,16*S*,22*S*)-ergosta-5,24(28)-dien-3,16,22-triol // IA vs 1 HTCL.
- 349** Ochrophyta *Sargassum muticum* // Galicia, Albacabre, Spain // Connection of isolated stereoclusters by combining <sup>13</sup>C-RCSA, RDC, and J-based configurational analyses and structural revision of a tetraprenyltoluquinol chromane meroterpenoid from *Sargassum muticum*  
**883** // R // C<sub>28</sub>H<sub>40</sub>O<sub>4</sub> // NT.



## 5 Red algae

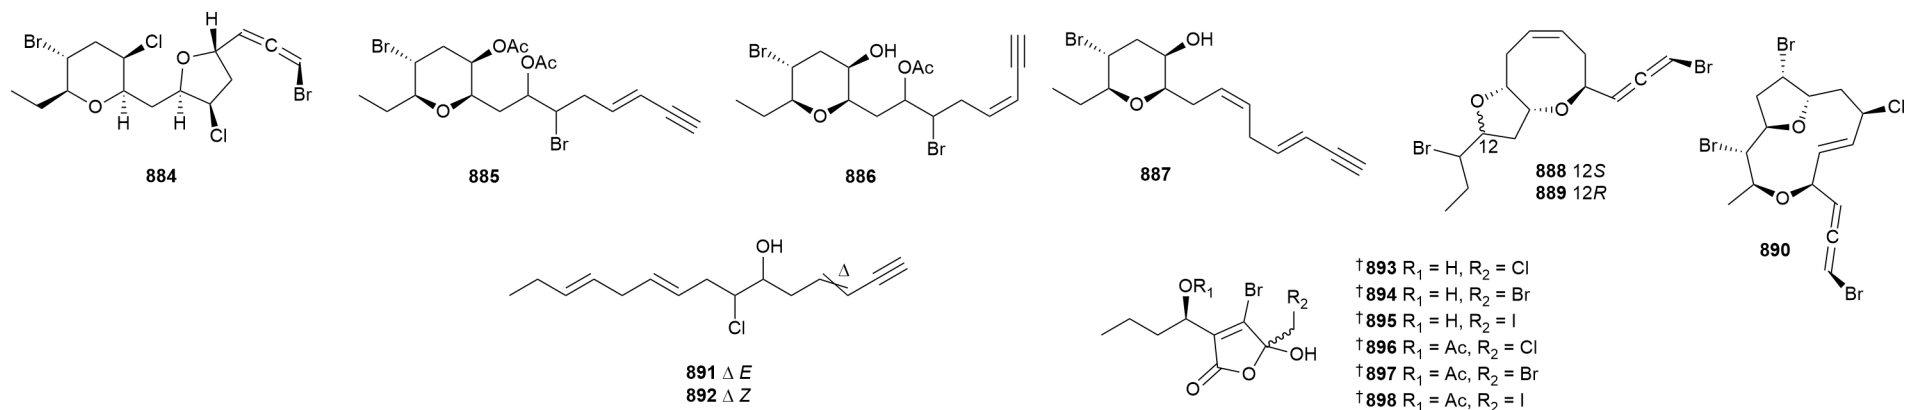

- 351** Rhodophyta *Laurencia saitoi* // Yoshio, Katsuura, Boso Peninsula, Chiba Prefecture, Japan // New acetogenin katsuurallene from *Laurencia saitoi* collected from Katsuura, Japan  
**884** // N // katsuurallene // IA vs antioxidant.; IA vs brine shrimp, IA vs anti-insecticidal, IA vs microb. strains.
- 352** Rhodophyta *Laurencia microcladia*, Rhodophyta *Laurencia obtusa* // Agia Kyriaki, Tinos Island, Greece // New C15 acetogenins from two species of *Laurencia* from the Aegean Sea  
**885** // N // 10-acetyl-sagonenyne // IA vs 2 bact. strains.  
**886** // N // *cis*-sagonenyne // IA vs 2 bact. strains.  
**887** // N // *trans*-thuwalenyne C // NT.  
**888** // N // tinosallene A // IA vs 2 bact. strains.  
**889** // N // tinosallene B // NT.  
**890** // N // obtusallene XI // IA vs 2 bact. strains.  
**891** // M // C<sub>15</sub>H<sub>21</sub>ClO // IA vs 2 bact. strains.  
**892** // M // C<sub>15</sub>H<sub>21</sub>ClO // IA vs 2 bact. strains.
- 353** Rhodophyta *Delisea* sp // Bonaparte Point, Palmer Station, Antarctica // Tongalides, halogenated butenolides from an Antarctic *Delisea* sp. rhodophyte  
**893** // N // tongalide A // IA vs 6 bact. strains.  
**894** // N // tongalide B // IA vs 6 bact. strains.  
**895** // N // tongalide C // IA vs 6 bact. strains.  
**896** // N // acetoxytongalide A // IA vs 6 bact. strains.  
**897** // N // acetoxytongalide B // IA vs 6 bact. strains.  
**898** // N // acetoxytongalide C // IA vs 6 bact. strains.

Key: Main article bibliography reference // Taxonomy // Location // Article title

Compound number // Status // Compound name // Biological activity and Other information

5 Red algae

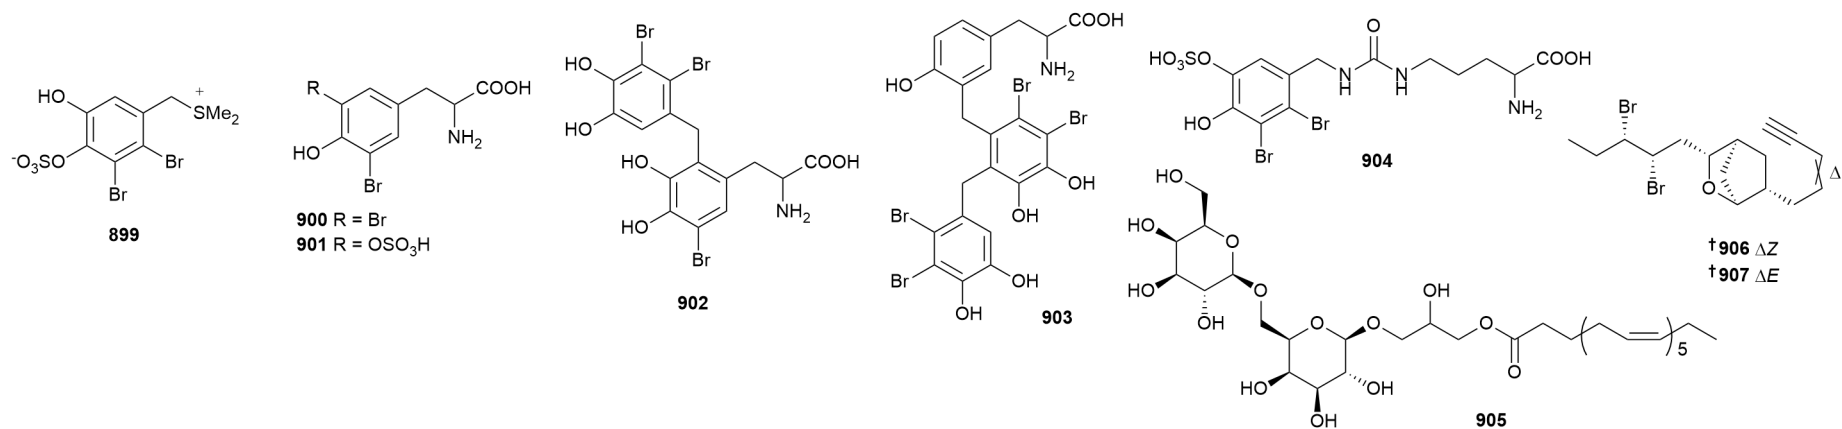

- 354 Rhodophyta *Vertebrata lanosa* // Dungloe Bay, West Donegal, Ireland // Amino acid-coupled bromophenols and a sulfated dimethylsulfonium lanosol from the red alga *Vertebrata lanosa*  
 899 // N // 4-sulfo-7-dimethylsulfonium lanosol // NT.  
 900 // N // 3,5-dibromotyrosine // NT.  
 901 // N // 3-bromo-5-sulfodihydroxyphenylalanine // NT.  
 902 // N // 3-bromo-6-lanosyl dihydroxyphenylalanine // NT.  
 903 // N // 3-(6'-lanosyl lanosyl) tyrosine // NT.  
 904 // N // 5-sulfovertebratol // NT.  
 905 // N // ((5Z,8Z,11Z,14Z,17Z)-eicosapentaenoic acid 3'-[(6''-O-α-galactopyranosyl)-β-D-galactopyranosyl]-1-glycerol ester // NT.
- 357 Rhodophyta *Laurencia* // // Total synthesis and structure confirmation of (*E*) and (*Z*)-ocellenyne  
 906 // R // (*Z*)-ocellenyne // abs. config. by tot. synth.  
 907 // R // (*E*)-ocellenyne // abs. config. by tot. synth.

## 6 Sponges

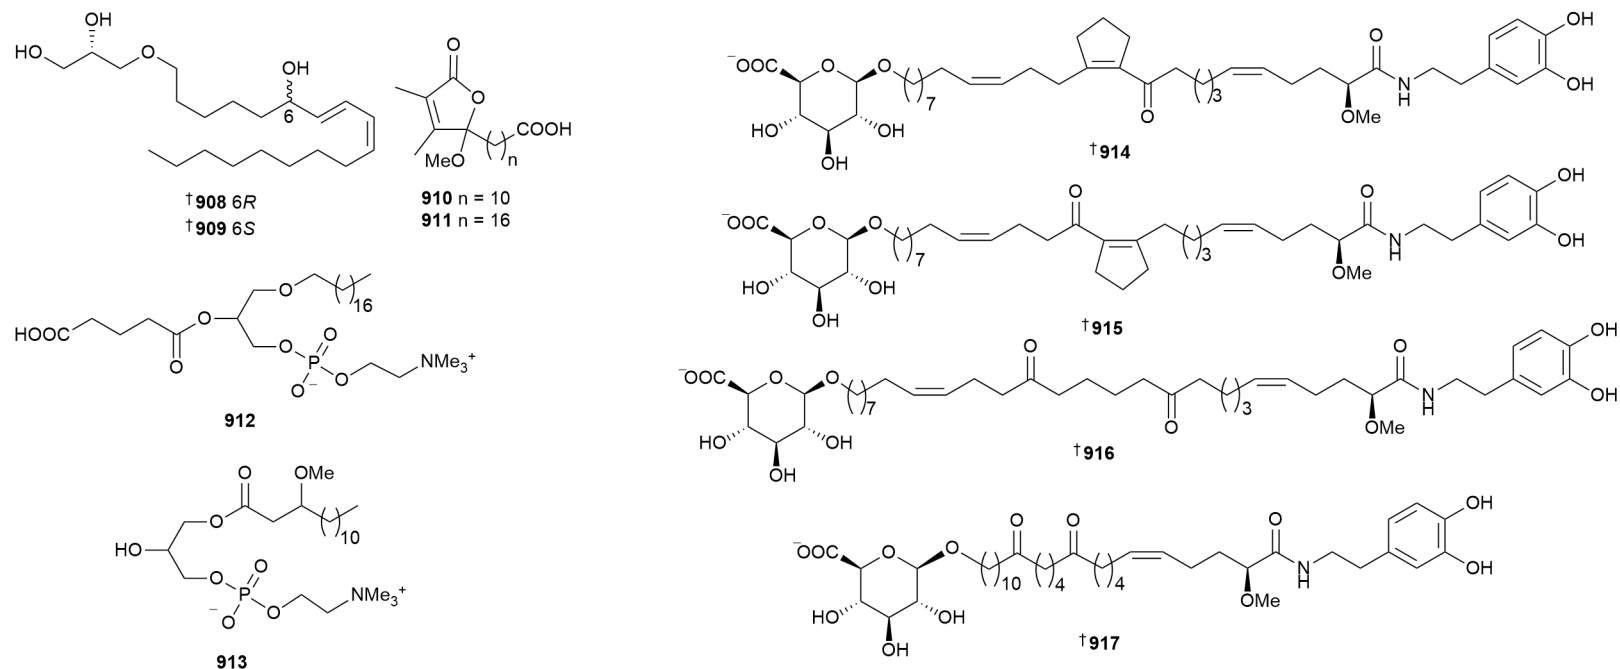

- 366** Porifera *Pericharax heteroraphis* // Wallis Island lagoon, Wallis and Futuna Islands // Isolation, synthesis and absolute configuration of the pericharaxins A and B, epimeric hydroxy-polyene glycerol ethers from the calcarean sponge *Pericharax heteroraphis*  
**908** // N // pericharaxin A // Stimulates collagen X transcription; total synth. also achieved.  
**909** // N // pericharaxin B // Stimulates collagen X transcription; total synth. also achieved.
- 367** Porifera *Scopalina hapalia* // Mayotte Island // New metabolites from the marine sponge *Scopalina hapalia* collected in Mayotte lagoon  
**910** // N // sinularone J // NT.  
**911** // N // sinularone K // NT.  
**912** // N // 1-O-octadecyl-2-pentanoyl-*sn*-glycero-3-phosphocholine // NT.  
**913** // N // 1-O-(3-methoxy-tetradecanoyl)-*sn*-glycero-3-phosphocholine // NT.
- 368** Porifera *Stelodoryx toporoki* // Dredge (476 - 519 m) Raikoke Island, Sea of Okhotsk // Toporosides A and B, cyclopentenyl-containing  $\omega$ -glycosylated fatty acid amides, and toporosides C and D from the northwestern Pacific marine sponge *Stelodoryx toporoki*  
**914** // N // toporoside A // Prevented TNF- $\alpha$  induced cardiac damage at non-toxic (2.5  $\mu$ M) conc.  
**915** // N // toporoside B // NT.  
**916** // N // toporoside C // Prevented TNF- $\alpha$  induced cardiac damage at non-toxic (2.5  $\mu$ M) conc.  
**917** // N // toporoside D // Prevented TNF- $\alpha$  induced cardiac damage at non-toxic (2.5  $\mu$ M) conc.

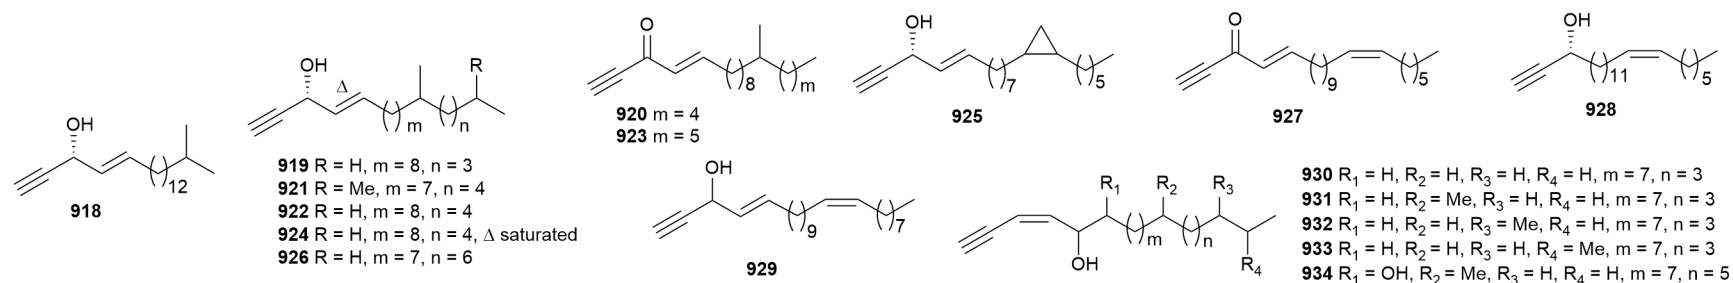

- 369** Porifera *Cribrochalina vasculum* // Conch Reef Wall, Florida Keys // Cytotoxic alkylnols of the sponge *Cribrochalina vasculum*: structure, synthetic analogs and SAR studies  
**918** // N // (3*R*)-18-methylnonadec-(4*E*)-en-1-yn-3-ol // weak cytotox. vs 1 of 2 HTCLs.  
**919** // N // (3*R*)-14-methylnonadec-(4*E*)-en-1-yn-3-ol // NT.  
**920** // N // 14-methylnonadec-(4*E*)-en-1-yn-3-one // NT.  
**921** // N // (3*R*)-13,18-dimethylnonadec-(4*E*)-en-1-yn-3-ol // NT.  
**922** // N // (3*R*)-14-methylicos-(4*E*)-en-1-yn-3-ol // NT.  
**923** // N // 14-methylicos-(4*E*)-en-1-yn-3-one // IA vs 2 HTCLs.  
**924** // N // (3*R*)-14-methylicos-1-yn-3-ol // Weak cytotox. vs 1 of 2 HTCLs.  
**925** // N // (3*R,E*)-12-*cis*-(2-hexylcyclopropyl)dodec-4-en-1-yn-3-ol // Weak cytotox. vs 1 of 2 HTCLs.  
**926** // N // (3*R*)-13-methylhenicos-(4*E*)-en-1-yn-3-ol // NT.  
**927** // N // docos-(4*E*,15*Z*)-dien-1-yn-3-one // IA vs 2 HTCLs.  
**928** // N // (3*R*)-docos-(15*Z*)-en-1-yn-3-ol // NT.  
**929** // N // *rac*-tetracos-(4*E*,15*Z*)-dien-1-yn-3-ol // NT, isol. as *rac*.  
**930** // N // *rac*-icos-(3*Z*)-en-1-yn-5-ol // NT, isol. as *rac*.  
**931** // N // *rac*-14-methylicos-(3*Z*)-en-1-yn-5-ol // NT, isol. as *rac*.  
**932** // N // *rac*-18-methylicos-(3*Z*)-en-1-yn-5-ol // NT, isol. as *rac*.  
**933** // N // *rac*-19-methylicos-(3*Z*)-en-1-yn-5-ol // NT, isol. as *rac*.  
**934** // N // 14-methyldocos-(3*Z*)-en-1-yn-5,6-diol // NT.

## 6 Sponges

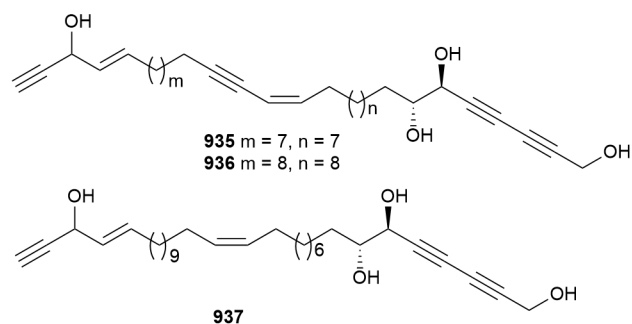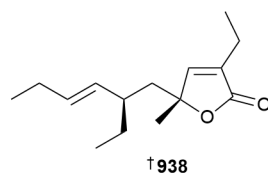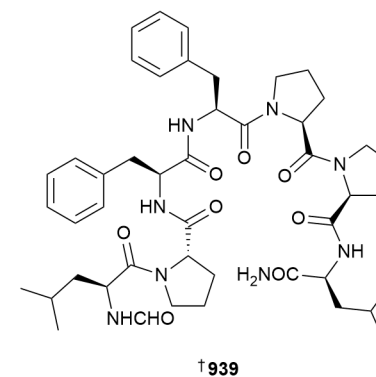

- 370** Porifera *Petrosia* sp // Yongxing Islands, China // New bioactive polyacetylenes from the marine sponge *Petrosia* sp.  
**935** // N // pellynol P // weak activ. vs 3 HTCLs.  
**936** // N // pellynol Q // weak activ. vs 3 HTCLs.  
**937** // N // pellynol R // weak activ. vs 3 HTCLs.
- 371** Porifera *Plakortis angulospiculatus* // Pedras Secas, Fernando de Noronha Archipelago, Brazil // Plakilactone J: structure and absolute configuration  
**938** // N // plakilactone J // NT.
- 372** Porifera *Callyspongia subarmigera* // South Sulawesi Island, Indonesia // Computational metabolomics tools reveal subarmigerides, unprecedented linear peptides from the marine sponge holobiont *Callyspongia subarmigera*  
**939** // N // subarmigeride A // NT.

## 6 Sponges

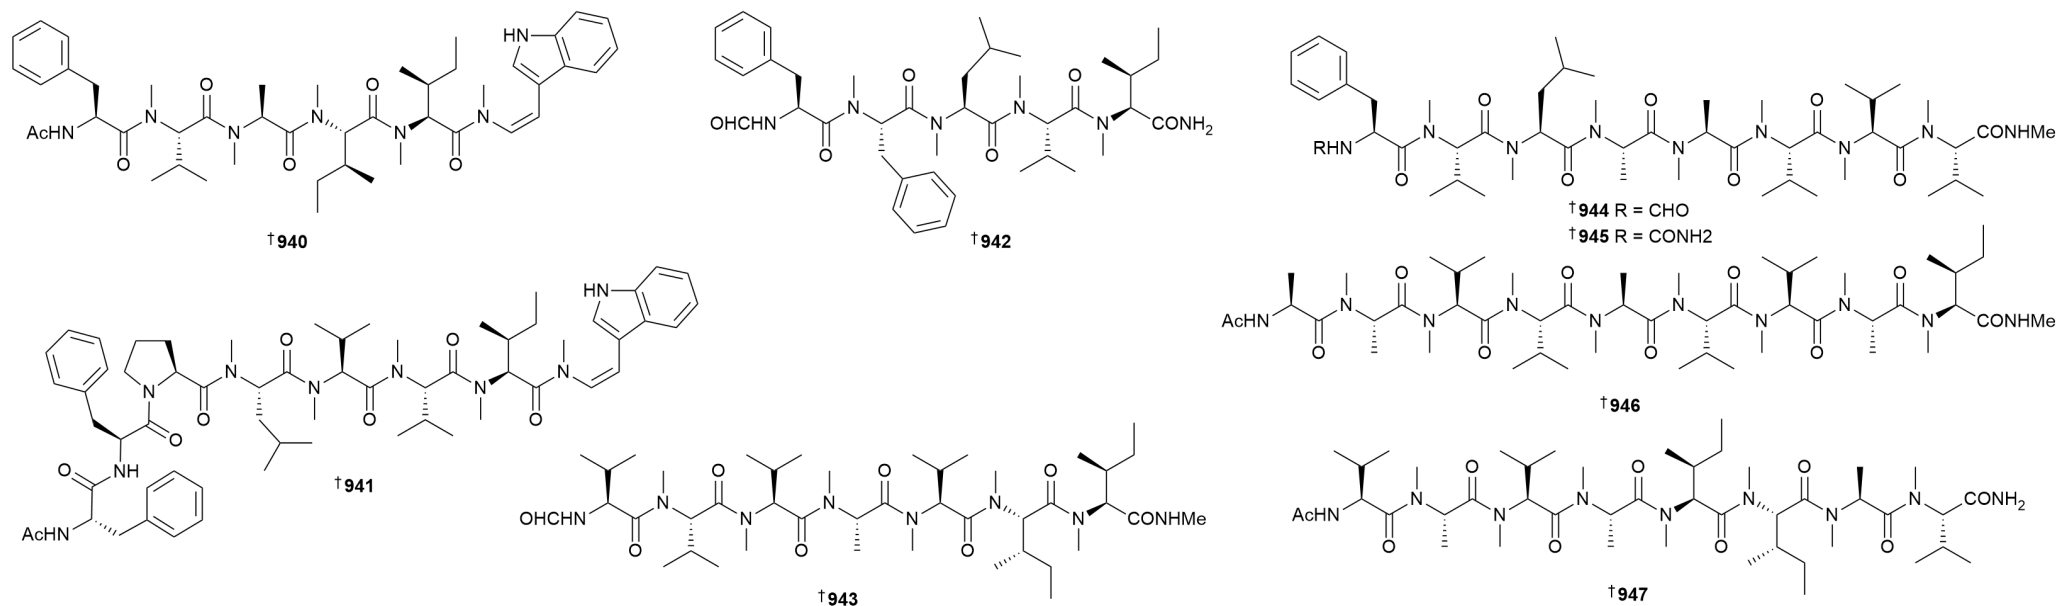

**373** Porifera *Inflatella coelosphaeroides* // Scotia Arc, Antarctica // Highly *N*-methylated peptides from the Antarctic sponge *Inflatella coelosphaeroides* are active against *Plasmodium falciparum*

**940** // R // friomaramide A // NT.

**941** // N // friomaramide B // weak activ. vs 3 *P. falciparum* strains.

**942** // N // shagamide A // weak activ. vs 3 *P. falciparum* strains.

**943** // N // shagamide B // weak activ. vs 1 of 3 *P. falciparum* strains.

**944** // N // shagamide C // weak activ. vs 3 *P. falciparum* strains.

**945** // N // shagamide D // weak activ. vs 2 of 3 *P. falciparum* strains.

**946** // N // shagamide E // IA vs 3 *P. falciparum* strains.

**947** // N // shagamide F // IA vs 3 *P. falciparum* strains.

## 6 Sponges

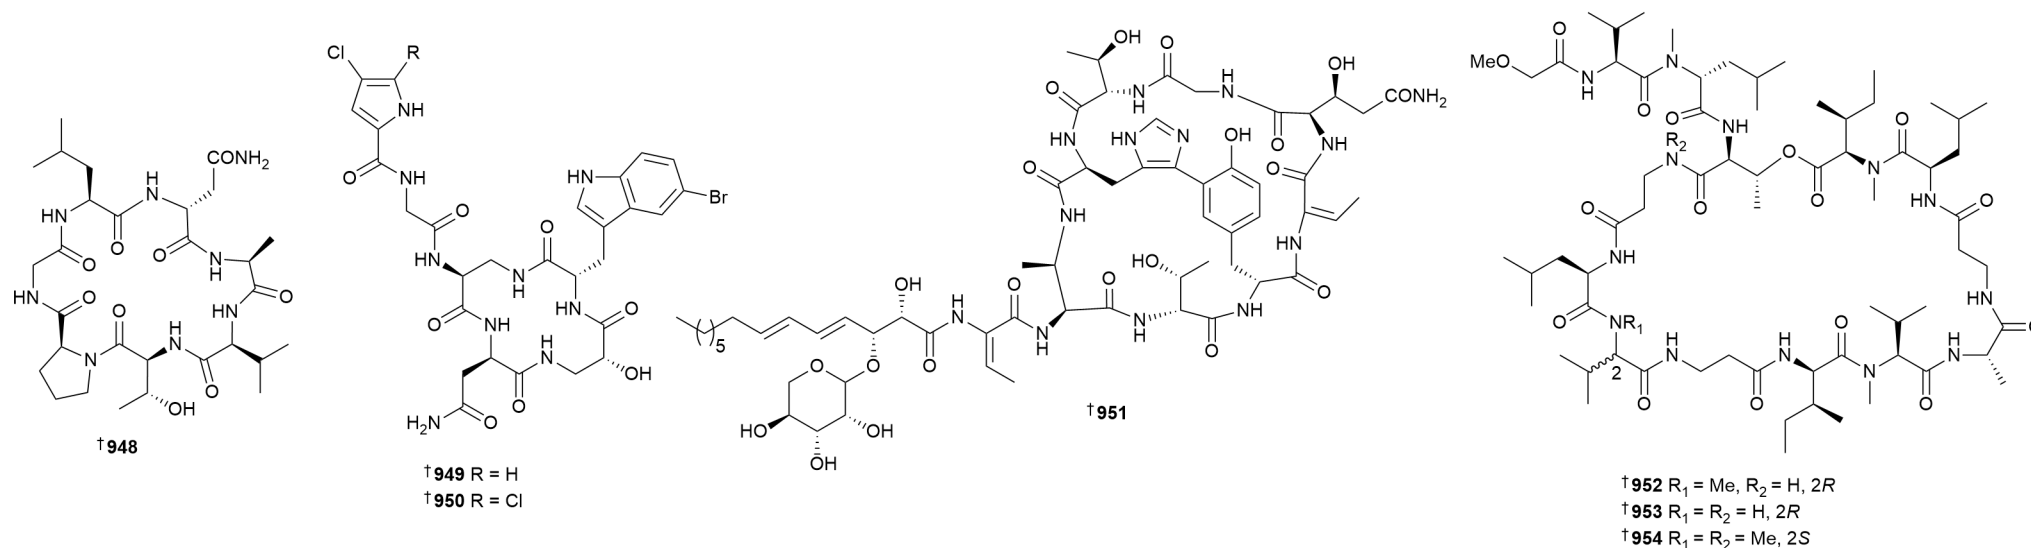

- 374** Porifera *Ectyoplasia ferox* // Tuxpan reef, Tuxpan, Veracruz, Mexico // Ectyoplasin, a novel cytotoxic cyclic peptide from *Ectyoplasia ferox* sponge  
**948** // N // ectyoplasin // IA to weak cytotox. vs 1 of 5 HTCLs.
- 375** Porifera *Psammocinia* sp // North Sulawesi, Indonesia // Cyclopsammocinamides A and B, enantiomeric cyclic peptides of cyclocinamide A, from the marine sponge *Psammocinia* sp.  
**949** // N // cyclopsammocinamide A // IA vs 1 HTCL; enantiomeric series to known cyclocinamide A.  
**950** // N // cyclopsammocinamide B // IA vs 1 HTCL; enantiomeric series to known cyclocinamide A.
- 376** Porifera *Poecillastra* sp // Dredge (245 m), Gonsone Seamount, Japan // Aciculitin D, a cytotoxic heterodetic cyclic peptide from a *Poecillastra* sp. marine sponge  
**951** // N // aciculitin D // weak cytotox. vs 2 HTCLs.
- 377** Porifera *Theonella swinhoei* // Kodingareng Keke Island, Makassar, Indonesia // New theonellapeptolides from Indonesian marine sponge *Theonella swinhoei* as anti-austerity agents  
**952** // N // theonellapeptolide IIb // IA vs 1 HTCL; IA vs 2 bact. strains.  
**953** // N // theonellapeptolide IIa // IA vs 1 HTCL; IA vs 2 bact. strains.  
**954** // N // theonellapeptolide IIc // IA vs 1 HTCL; IA vs 2 bact. strains.

## 6 Sponges

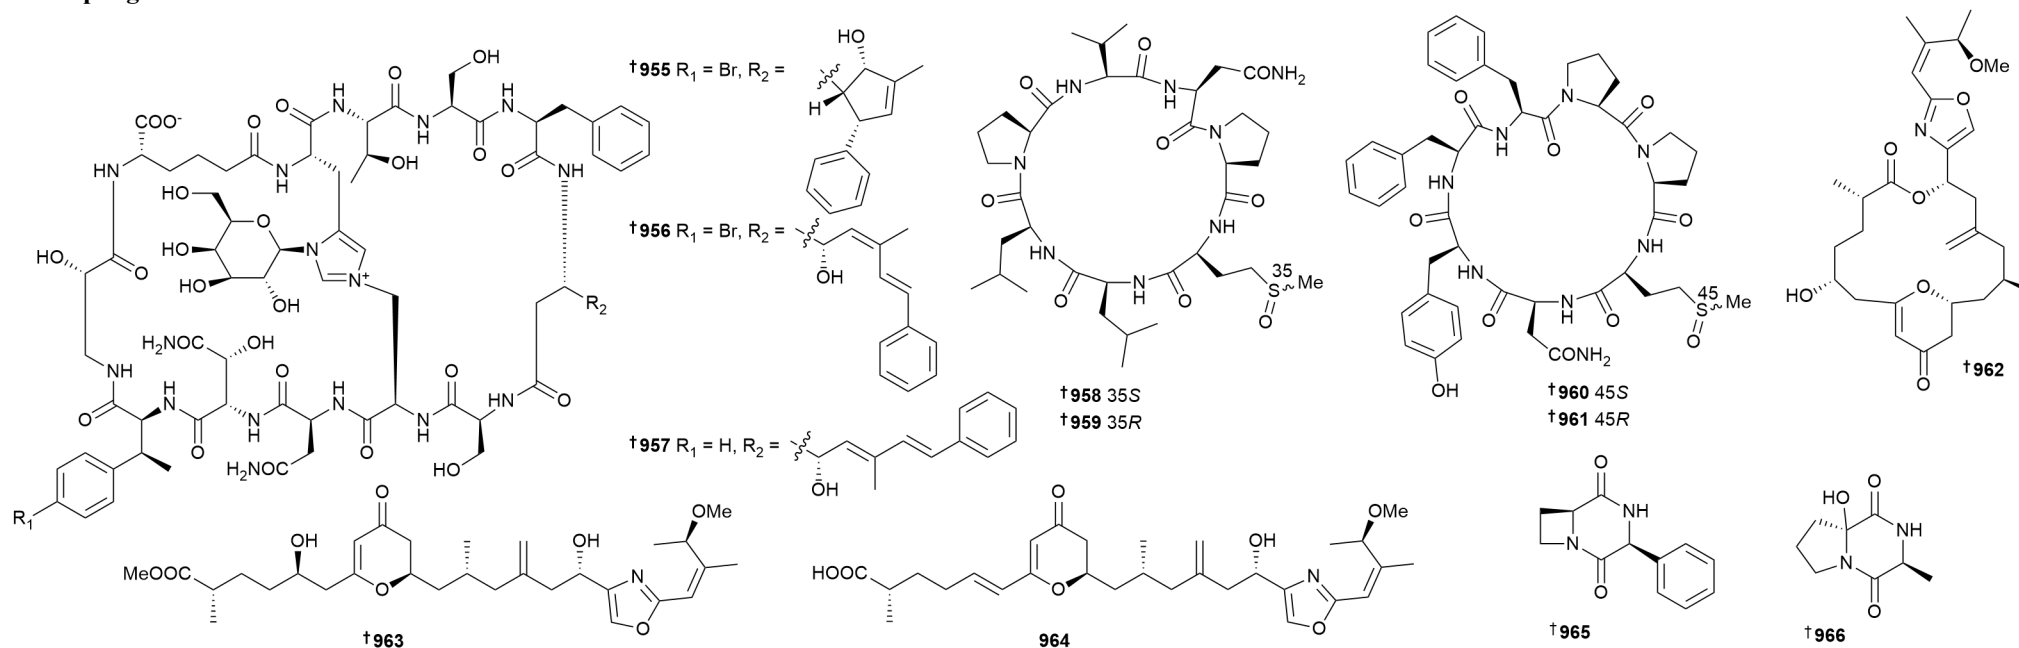

- 378** Porifera *Theonella swinhoei* // Gulf of Aqaba, Red Sea, Egypt // Theonellamides J and K and 5-*cis*-Apoa-theopalauamide, bicyclic glycopeptides of the Red Sea sponge *Theonella swinhoei*  
**955** // N // theonellamide J // IA vs 1 HTCL.  
**956** // N // 5-*cis*-Apoa-theopalauamide // IA vs 1 HTCL.  
**957** // N // theonellamide K // weak cytotox. vs 1 HTCL
- 379** Porifera *Axinella* sp // Yongxing Island, South China Sea // Axinellasins A–D, immunosuppressive cycloheptapeptide diastereomers, discovered via a precursor ion scanning–supercritical fluid chromatography strategy from the marine sponge *Axinella* species  
**958** // N // axinellasin A // IA vs 5 HTCL; immunomod. @ 10 μM.  
**959** // N // axinellasin B // IA vs 5 HTCLs; immunomod. @ 10 μM.  
**960** // N // axinellasin C // IA vs 5 HTCLs; immunomod. @ 10 μM.  
**961** // N // axinellasin D // IA vs 5 HTCLs; immunomod. @ 10 μM; tot. synth. achieved.
- 380** Porifera *Homophymia* sp // Gorontalo, Indonesia // Enigmazole C: a cytotoxic macrocyclic lactone and its ring-opened derivatives from a new species of *Homophymia* sponge  
**962** // N // enigmazole C // IA vs 4 HTCLs.  
**963** // A // enigmazole E // NT; artefact of isol.  
**964** // N // enigmazole D // weak to mod. cytotox. vs 4 HTCLs.
- 381** Porifera *Haliclona baeri* // Xuwen County, Zhanjiang City, Guangdong Province, China // Two new 2,5-dioxopiperazines from the marine sponge *Haliclona baeri*  
**965** // N // haliclone A // IA vs 5 bact. strains.  
**966** // N // haliclone B // IA vs 5 bact. strains.

**Key:** Main article bibliography reference // Taxonomy // Location // Article title

Compound number // Status // Compound name // Biological activity and Other information



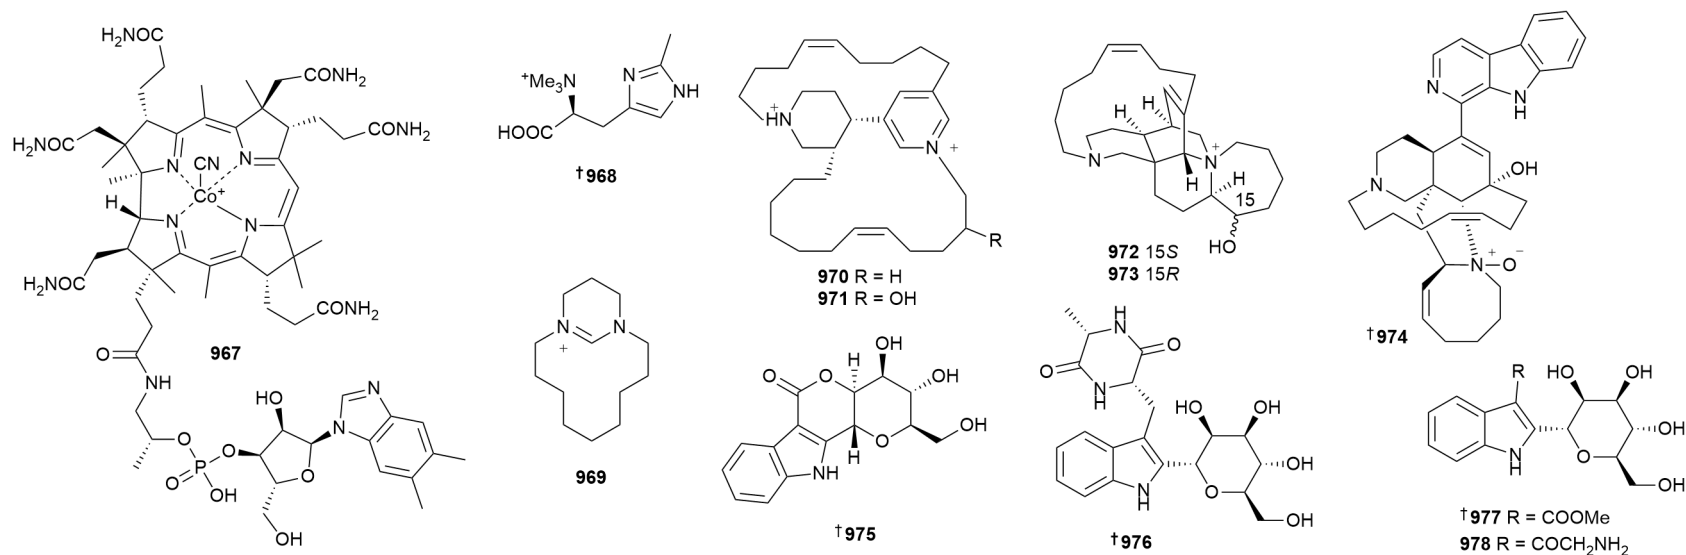

- 382** Porifera *Characella pachastrelloides* // Eastern Atlantic Ocean // Unveiling the chemical diversity of the deep-sea sponge *Characella pachastrelloides*  
**967** // M // cyanocobalamin // NT; known vitamin.  
**968** // N // 6-methylhircynine // weak cytotox. vs 1 HTCL.
- 383** Porifera *Neopetrosia chaliniformis* // Xisha Islands, South China Sea // Neopetrosins A–D and haliclorensine D, indole-C-mannopyranosides and a diamine alkaloid isolated from the South China Sea marine sponge *Neopetrosia chaliniformis*  
**969** // N // haliclorensine D // NT.
- 384** Porifera *Callyspongia samarensis* // Buka Is., Bouganville, Papua New Guinea // Screening of diverse marine invertebrate extracts identified lissoclinotoxin F, discodermin B, and other anti-*Mycobacterium tuberculosis* active compounds  
**970** // N // hexahydrohaliclonacyclamine A // IA vs *M. tuberculosis*; IA vs 1 nMCL.  
**971** // N // 22-hydroxy-hexahydrohaliclonacyclamine A // IA vs *M. tuberculosis*; IA vs 1 nMCL.
- 385** Porifera *Amphimedon* sp // Zamami, Okinawa // Zamamiphidins B and C, manzamine-related alkaloids from an *Amphimedon* sp. marine sponge collected in Okinawa  
**972** // N // zamamiphidin B // IA vs 2 HTCLs; IA vs AChE.  
**973** // N // zamamiphidin C // IA vs 2 HTCLs; IA vs AChE.
- 386** Porifera *Neopetrosia proxima* // Kenting National Park, Pingtung county, Taiwan // Discovering manzamine-related alkaloids from sponge *Neopetrosia proxima*  
**974** // N // manzamine A 27-*N*-oxide // weak cytotox. vs 4 HTCLs; less active than non-*N*-oxide.
- 383** Porifera *Neopetrosia chaliniformis* // Xisha Islands, South China Sea // Neopetrosins A–D and haliclorensine D, indole-C-mannopyranosides and a diamine alkaloid isolated from the South China Sea marine sponge *Neopetrosia chaliniformis*  
**975** // N // neopetrosin A // weak hepatoprotective agent.  
**976** // N // neopetrosin B // weak hepatoprotective agent.  
**977** // N // neopetrosin C // NT.  
**978** // N // neopetrosin D // weak hepatoprotective agent.

**Key:** Main article bibliography reference // Taxonomy // Location // Article title

Compound number // Status // Compound name // Biological activity and Other information

## 6 Sponges

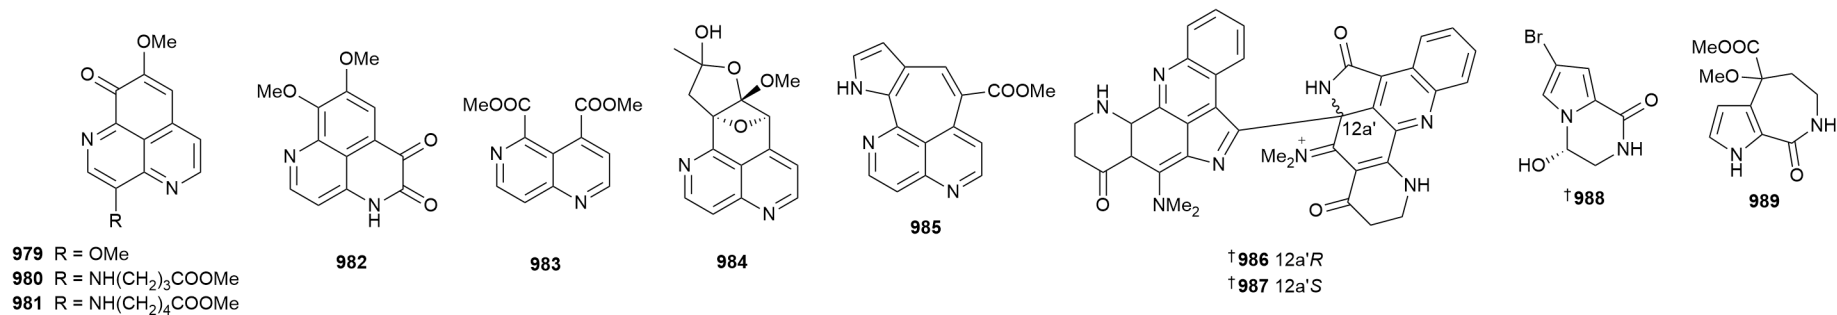

- 387** Porifera *Aaptos suberitoides* // Xisha Islands, China // Aaptamine derivatives with CDK2 inhibitory activities from the South China Sea sponge *Aaptos suberitoides*  
**979** // N // 3-methoxy-demethyl(oxy)aaptamine // IA vs 5 HTCLs.  
**980** // N // 3-(N-4-methylbutanoate) aminodemethyl(oxy)aaptamine // IA vs 5 HTCLs; not isol. artefact.  
**981** // N // 3-(N-4-methylpentanoate) aminodemethyl(oxy)aaptamine // IA vs 5 HTCLs; not isol. artefact.
- 388** Porifera *Aaptos aaptos* // Vanphong Bay, Nha Trang, Vietnam // Four new aaptamine alkaloids from marine sponge *Aaptos aaptos*  
**982** // N // 9-methoxy-N-demethylaaptanone // IA vs 4 HTCLs.  
**983** // N // 3,5-dicarbomethoxy-1,6-naphthyridine // IA vs 4 HTCLs.  
**984** // N // aaptosvanphong A // IA vs 4 HTCLs.  
**985** // N // aaptosvanphong B // IA vs 4 HTCLs.
- 389** Porifera *Plakortis* sp // Kingdom of Tonga // Photochemical dimerization of plakinidine B leads to potent inhibition of the E3 ubiquitin-protein ligase Cbl-b  
**986** // N // plakoramine A (-) // weak inhib. of E3 CBL ubiquitin protein ligase; IA vs NCI-60 cell panel; isol. as rac.  
**987** // N // plakoramine A (+) // weak inhib. of E3 CBL ubiquitin protein ligase; IA vs NCI-60 cell panel; Isol. as rac.
- 390** Porifera *Agelas nakamura* // Orchid Island, Taiwan // Computationally assisted structure elucidation of new 2-guanidinoethanesulfonyl sesquiterpenoid alkaloids: agelasidines G–I from the marine sponge *Agelas nakamura*  
**988** // R // (-)-mukanadin C // NT
- 391** Porifera *Axinella* sp // Jiaotou coast, Xisha area, China // Axinellamine E, one new pyrrololactam alkaloid from the South China Sea sponge *Axinella* sp.  
**989** // N // axinellamine E // IA vs 1 HTCL and 1 nMCL.

Key: Main article bibliography reference // Taxonomy // Location // Article title

Compound number // Status // Compound name // Biological activity and Other information

## 6 Sponges

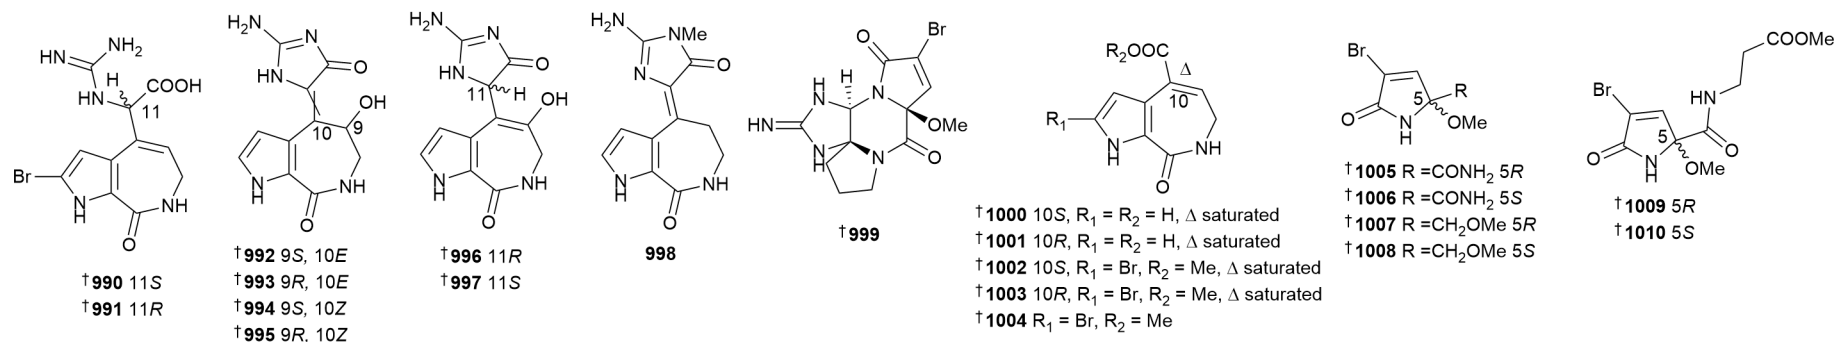

### 392 Porifera *Stylissa massa* // Xisha Islands, China // A series of new pyrrole alkaloids with ALR2 inhibitory activities from the sponge *Stylissa massa*

- 990** // N // C<sub>11</sub>H<sub>14</sub>BrN<sub>5</sub>O<sub>3</sub> // IA vs ALR2; isol. as rac.  
**991** // N // C<sub>11</sub>H<sub>14</sub>BrN<sub>5</sub>O<sub>3</sub> // IA vs ALR2; isol. as rac.  
**992** // N // C<sub>11</sub>H<sub>11</sub>N<sub>5</sub>O<sub>3</sub> // weak inhib. vs ALR2; isol. as rac.  
**993** // N // C<sub>11</sub>H<sub>11</sub>N<sub>5</sub>O<sub>3</sub> // weak inhib. vs ALR2; isol. as rac.  
**994** // N // C<sub>11</sub>H<sub>11</sub>N<sub>5</sub>O<sub>3</sub> // weak inhib. vs ALR2; isol. as rac.  
**995** // N // C<sub>11</sub>H<sub>11</sub>N<sub>5</sub>O<sub>3</sub> // weak inhib. vs ALR2; isol. as rac.  
**996** // N // C<sub>11</sub>H<sub>11</sub>N<sub>5</sub>O<sub>3</sub> // weak inhib. vs ALR2; isol. as rac.  
**997** // N // C<sub>11</sub>H<sub>11</sub>N<sub>5</sub>O<sub>3</sub> // weak inhib. vs ALR2; isol. as rac.  
**998** // N // C<sub>12</sub>H<sub>13</sub>N<sub>5</sub>O<sub>2</sub> // weak inhib. vs ALR2.  
**999** // N // C<sub>12</sub>H<sub>14</sub>BrN<sub>5</sub>O<sub>3</sub> // IA vs ALR2.  
**1000** // N // C<sub>9</sub>H<sub>10</sub>N<sub>2</sub>O<sub>3</sub> // IA vs ALR2; isol. as rac.  
**1001** // N // C<sub>9</sub>H<sub>10</sub>N<sub>2</sub>O<sub>3</sub> // IA vs ALR2; isol. as rac.  
**1002** // N // C<sub>10</sub>H<sub>11</sub>BrN<sub>2</sub>O<sub>3</sub> // IA vs ALR2; isol. as rac.  
**1003** // N // C<sub>10</sub>H<sub>11</sub>BrN<sub>2</sub>O<sub>3</sub> // IA vs ALR2; isol. as rac.  
**1004** // N // C<sub>10</sub>H<sub>9</sub>BrN<sub>2</sub>O<sub>3</sub> // IA vs ALR2.  
**1005** // N // C<sub>6</sub>H<sub>7</sub>BrN<sub>2</sub>O<sub>3</sub> // IA vs ALR2; isol. as rac.  
**1006** // N // C<sub>6</sub>H<sub>7</sub>BrN<sub>2</sub>O<sub>3</sub> // IA vs ALR2; isol. as rac.  
**1007** // N // C<sub>7</sub>H<sub>10</sub>BrNO<sub>3</sub> // IA vs ALR2; isol. as rac.  
**1008** // N // C<sub>7</sub>H<sub>10</sub>BrNO<sub>3</sub> // IA vs ALR2; isol. as rac.  
**1009** // N // C<sub>10</sub>H<sub>13</sub>BrN<sub>2</sub>O<sub>5</sub> // IA vs ALR2; isol. as rac.  
**1010** // N // C<sub>10</sub>H<sub>13</sub>BrN<sub>2</sub>O<sub>5</sub> // IA vs ALR2; isol. as rac.

**Key:** Main article bibliography reference // Taxonomy // Location // Article title

Compound number // Status // Compound name // Biological activity and Other information

## 6 Sponges

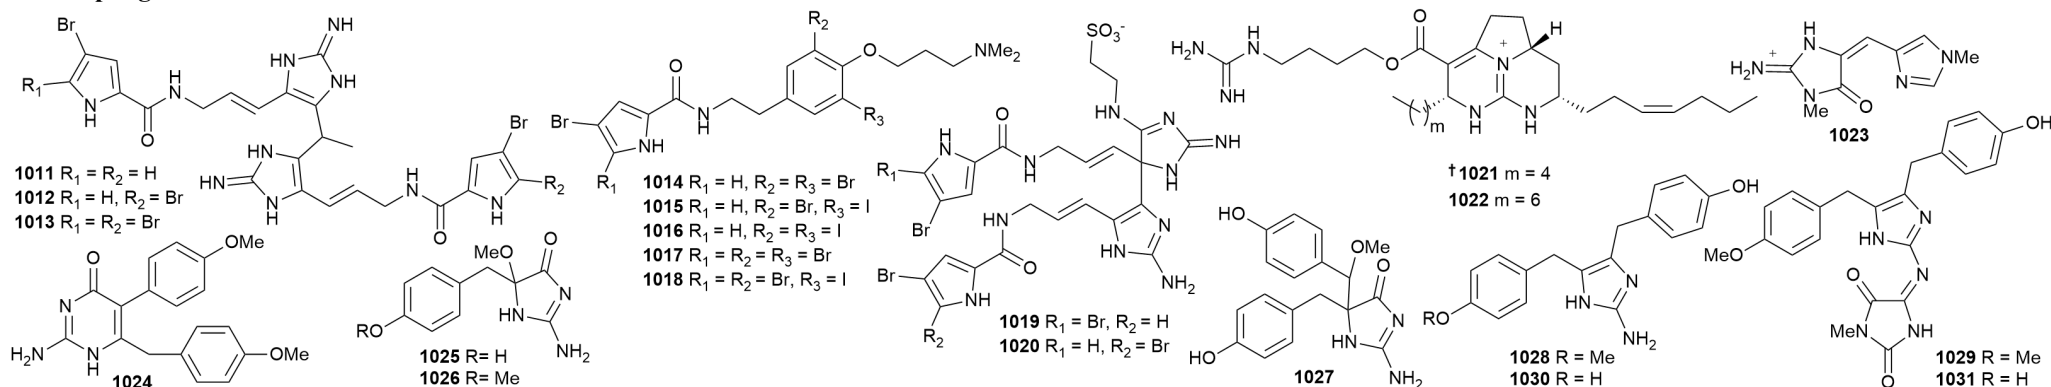

- 393** Porifera *Agelas dispar* // Fernando de Noronha-PE, Brazil // Feature-based molecular networking discovery of bromopyrrole alkaloids from the marine sponge *Agelas dispar*  
**1011** // N // disparamide A // IA vs 1 HTCL.  
**1012** // N // disparamide B // IA vs 1 HTCL.  
**1013** // N // disparamide C // NT.  
**1014** // N // dispyrin B // IA vs 1 HTCL.  
**1015** // N // dispyrin C // IA vs 1 HTCL.  
**1016** // N // dispyrin D // IA vs 1 HTCL.  
**1017** // N // dispyrin E // NT.  
**1018** // N // dispyrin F // NT.  
**1019** // N // nagelamide H2 // IA vs 1 HTCL.  
**1020** // N // nagelamide H3 // IA vs 1 HTCL.
- 394** Porifera *Monanchora pulchra* // Dredge (94 m), Okhotsk sea, near Iturup Island // New guanidine alkaloids batzelladines O and P from the marine sponge *Monanchora pulchra* induce apoptosis and autophagy in prostate cancer cells  
**1021** // N // batzelladine O // weak cytotox. vs 3 HTCLs; induces autophagy.  
**1022** // N // batzelladine P // weak cytotox. vs 3 HTCLs; induces autophagy.
- 395** Porifera *Clathria* sp // Woolgoolga rock pools, New South Wales, Australia // Hesperine, a new imidazole alkaloid and  $\alpha$ -synuclein binding activity of 1-methyl-1,2,7,8-tetrahydro-2,8-dioxoadenosine from the marine sponge *Clathria (Thalysias)* cf. *hesperia*  
**1023** // N // hesperine // IA vs 3 bact. strains; IA vs  $\alpha$ -synuclein aggregation.
- 396** Porifera *Ernstia naturalis* // Passe Balidirou, (Mauritius) // An aminopyrimidone and aminoimidazole alkaloids from the Rodrigues calcareous marine sponge *Ernstia naturalis*  
**1024** // N // ernstine A // NT; first aminopyrimidone from a calcareous sponge.  
**1025** // N // phorbatopsin D // NT.  
**1026** // N // phorbatopsin E // NT.  
**1027** // N // calcardine C // NT.  
**1028** // N // naamine H // NT.  
**1029** // N // naamidine J // NT.  
**1030** // N // naamine I // NT.  
**1031** // N // naamidine K // NT.

**Key:** Main article bibliography reference // Taxonomy // Location // Article title

Compound number // Status // Compound name // Biological activity and Other information

## 6 Sponges

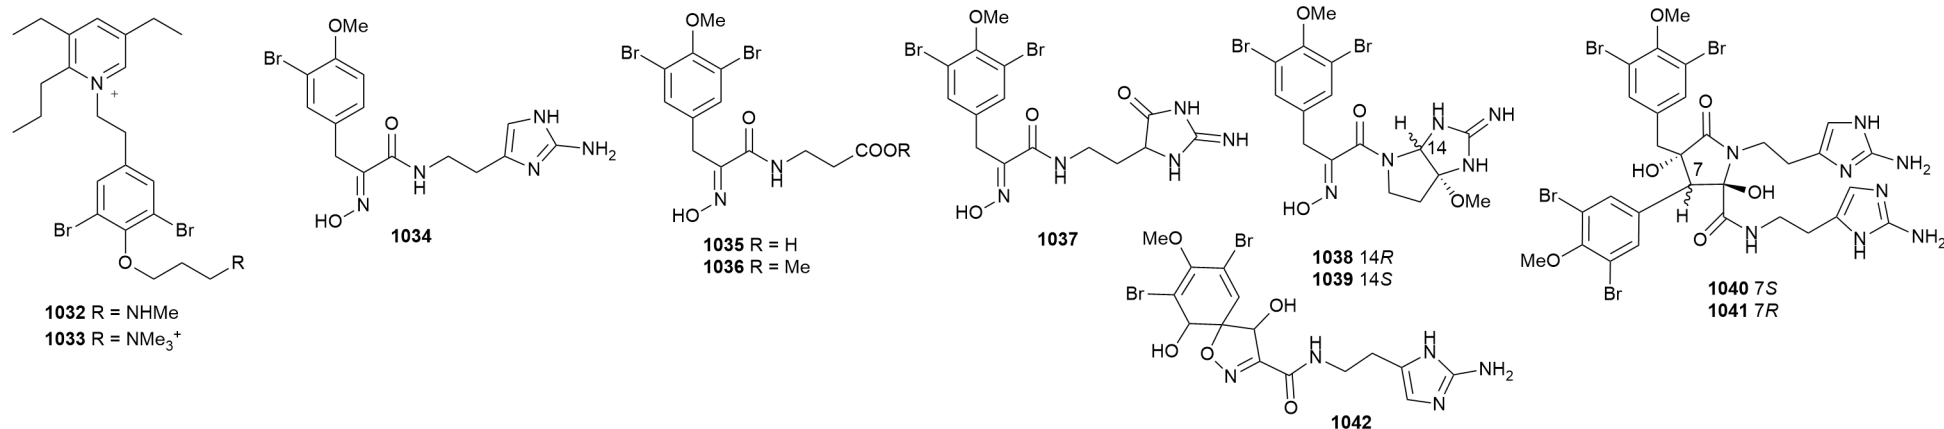

- 397** Porifera *Suberea* sp // Cape Maeda, Okinawa, Japan // Ma'edamines E and F, rare bromotyrosine alkaloids possessing a 1,2,3,5-tetrasubstituted pyridinium moiety from an Okinawan marine sponge *Suberea* sp.  
**1032** // N // ma'edamine E // weak cytotox. vs 1 HTCL.  
**1033** // N // ma'edamine F // weak cytotox. vs 1 HTCL.
- 398** Porifera *Aiolochoia crassa* // Sweetings Cay, Bahamas, Caribbean // Bioactive bromotyrosine alkaloids from the Bahamian marine sponge *Aiolochoia crassa*. dimerization and oxidative motifs  
**1034** // N // debromoianthelline // NT.  
**1035** // N // pseudoceratinic acid // NT.  
**1036** // N // methyl pseudoceratinic acid // NT.  
**1037** // N // 13-oxo-ianthelline // NT; inseparable 2:1 mix of enantiomers.  
**1038** // N // aiolochroiamide A // NT; isolated as inseparable mixture.  
**1039** // N // aiolochroiamide B // NT; isolated as inseparable mixture.  
**1040** // N // aiolochroiamide C // IA vs 6 fungal strains.  
**1041** // N // aiolochroiamide D // IA vs 6 fungal strains.  
**1042** // N // 7-hydroxypurealidin J // NT.

Key: Main article bibliography reference // Taxonomy // Location // Article title

Compound number // Status // Compound name // Biological activity and Other information

## 6 Sponges

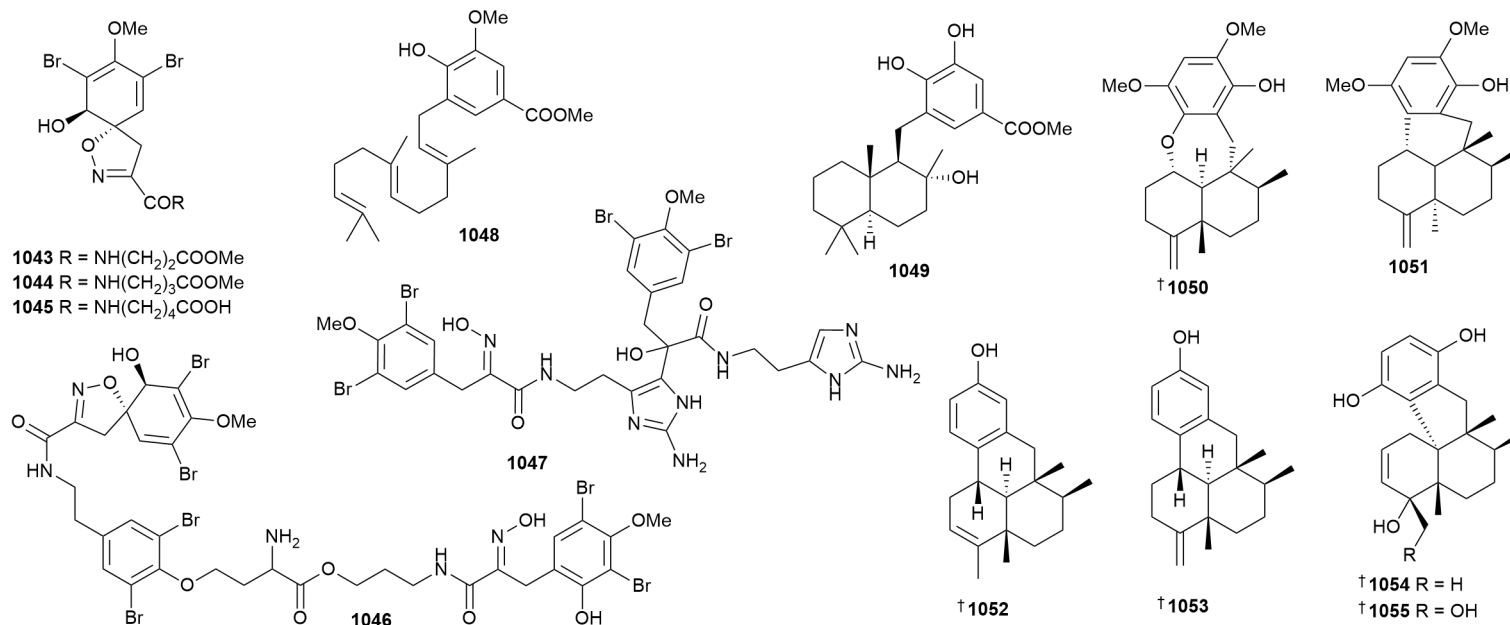

- 399** Porifera *Pseudoceratina verrucosa* // Exmouth Gulf, Ningaloo Reef, Australia // Spiroisoxazoline inhibitors of acetylcholinesterase from *Pseudoceratina verrucosa*. Quantitative chiroptical analysis of configurational heterogeneity, and total synthesis of (±)-methyl purpuroceratate C  
**1043** // A // methyl purpurocerate A // NT; possible artefact, isol. as mix of enantiomers.  
**1044** // A // methyl purpurocerate B // NT; possible artefact, isol. as mix of enantiomers.  
**1045** // N // purpuroceratic acid C // NT; isol. as mix of enantiomers.  
**1046** // N // ningalamide A // NT; isol. as mix of diastereomers.  
**1047** // N // ningalamide B // NT.
- 400** Porifera *Dactylospongia elegans* // Xisha Island, Hainan Province, China // Xishaeleganins A–D, sesquiterpenoid hydroquinones from Xisha marine sponge *Dactylospongia elegans*  
**1048** // N // xishaeleganin A // NT.  
**1049** // N // xishaeleganin B // mod. activ. vs 3 bact. strains.  
**1050** // N // xishaeleganin C // mod. activ. vs 3 bact. strains.  
**1051** // N // xishaeleganin D // weak activ. vs 1 of 3 bact. strains.
- 401** Porifera *Dysidea avara* // Xisha Islands, China // Dysideanones F–G and dysis herbols D–E, unusual sesquiterpene quinones with rearranged skeletons from the marine sponge *Dysidea avara*  
**1052** // N // dysideanone F // IA vs NF-κB  
**1053** // N // dysideanone G // IA vs NF-κB  
**1054** // N // dysis herbol D // weak inhibit. of NF-κB activation.  
**1055** // N // dysis herbol E // weak inhibit. of NF-κB activation.

**Key:** Main article bibliography reference // Taxonomy // Location // Article title

Compound number // Status // Compound name // Biological activity and Other information

## 6 Sponges

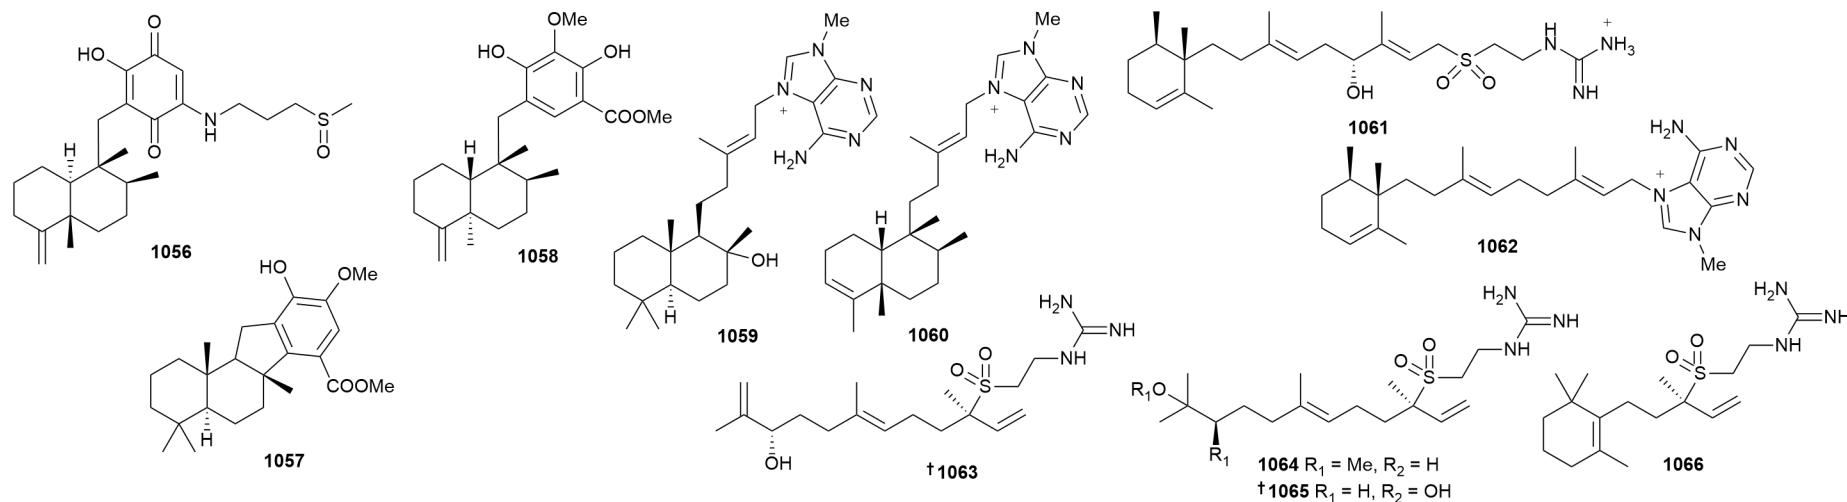

- 402** Porifera *Spongia pertusa* // Yongxing Island, China // Meros sesquiterpenes from the marine sponge *Spongia pertusa* Esper and their antifungal activities  
**1056** // N // 24-methylsulfinyl-lancone B // weak activ. vs 3 bact. strains.  
**1057** // N // pelorol A // IA vs 3 bact. strains; should be pelorol B.  
**1058** // N // epi-langconol A // IA vs 3 bact. strains.
- 403** Porifera *Agelas citrina* // Cozumel Island, Quintana Roo, Mexico // Antimicrobial diterpene alkaloids from an *Agelas citrina* sponge collected in the Yucatán Peninsula  
**1059** // N // (+)-8-epiagelasine T // weak activ. vs 6 of 7 bact. strains.  
**1060** // N // (+)-10-epiagelasine B // mod. activ. vs 7 bact. strains.  
**1061** // N // (+)-12-hydroxyagelasidine C // weak to mod. activ. vs 7 bact. strains.  
**1062** // M // (+)-ent-agelasine F // mod. activ. vs 6 of 7 bact. strains.
- 390** Porifera *Agelas nakamurai* // Orchid Island, Taiwan // Computationally assisted structure elucidation of new 2-guanidinoethanesulfonyl sesquiterpenoid alkaloids: agelasidines G–I from the marine sponge *Agelas nakamurai*  
**1063** // N // agelasidine G // IA in antibacterial disk diffusion assay.  
**1064** // N // agelasidine H // NT.  
**1065** // N // agelasidine I // NT.
- 404** Porifera *Agelas nakamurai* // Orchid Island, Taiwan // 2-Guanidinoethanesulfonyl sesquiterpenes from the marine sponge *Agelas nakamurai*  
**1066** // N // cyclohexylagelasidine A // IA vs anti-inflam.

## 6 Sponges

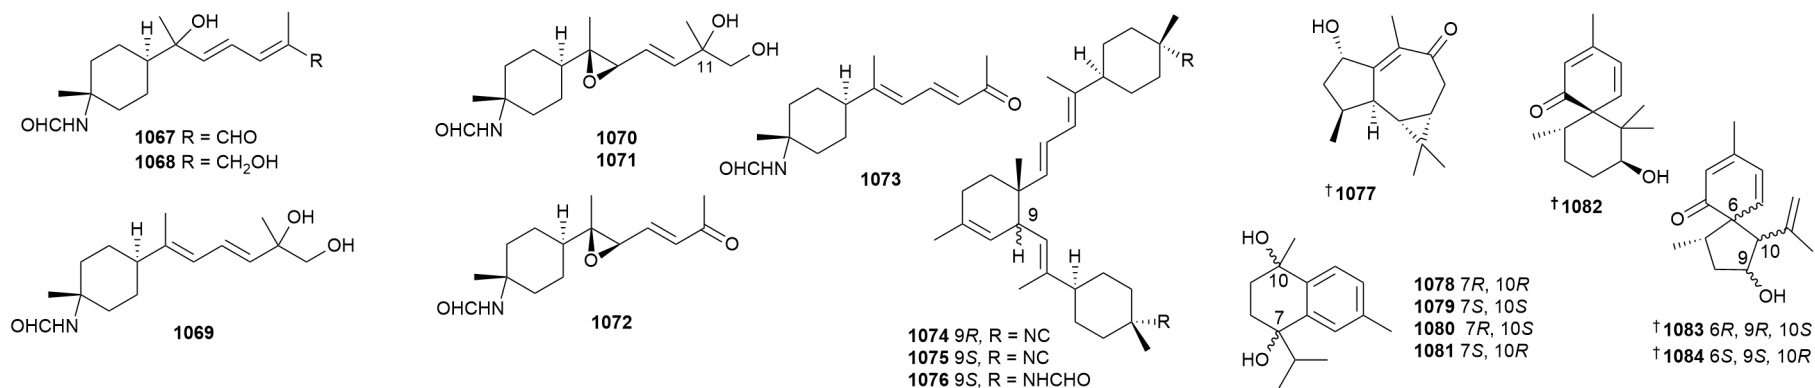

- 405** Porifera order Bubarida // Futuna Islands // Antifungal mono- and dimeric nitrogenous bisabolene derivatives from a sponge in the order Bubarida from Futuna Islands
- 1067** // N // (±)-bubaridin A // IA vs 5 fungal strains; isol. as rac.  
**1068** // N // (±)-bubaridin B // IA vs 5 fungal strains; isol. as rac.  
**1069** // N // (±)-bubaridin C // NT; isol. as rac.  
**1070** // N // (±)-bubaridin D // IA vs 5 fungal strains; isol. as rac.  
**1071** // N // (±)-bubaridin D // IA vs 5 fungal strains; isol. as rac.  
**1072** // N // (±)-bubaridin E // IA vs 5 fungal strains; isol. as rac.  
**1073** // N // (±)-bubaridin F // IA vs 5 fungal strains; isol. as rac.  
**1074** // N // (±)-*trans*-dimer theonellin isocyanide // weak to mod. activ. vs 2 of 5 fungi; isol. as rac.  
**1075** // N // (±)-*cis*-dimer theonellin isocyanide // IA vs 5 fungal strains; isol. as rac.  
**1076** // N // (±)-*cis*-dimer theonellin formamide // IA vs 5 fungal strains; isol. as rac.
- 406** Porifera *Acanthella cavernosa* // Ximao Island, Hainan Prov., China // Anti-inflammatory aromadendrane- and cadinane-type sesquiterpenoids from the South China Sea sponge *Acanthella cavernosa*
- 1077** // N // (+)-ximaocavernosin P // IA vs anti-inflam.  
**1078** // N // (+)-maninsigin D // IA vs anti-inflam.  
**1079** // N // (-)-maninsigin D // IA vs anti-inflam.  
**1080** // N // (+)-ximaocavernosin Q // IA vs anti-inflam.  
**1081** // N // (-)-ximaocavernosin Q // IA vs anti-inflam.
- 407** Porifera *Myrmekioderma* sp // Xisha Islands, Hainan, China // New spiro-sesquiterpenoids from the marine sponge *Myrmekioderma* sp.
- 1082** // N // myrmekione A // IA vs 5 HTCLs.  
**1083** // N // myrmekione B // IA vs 5 HTCLs.  
**1084** // N // myrmekione C // IA vs 5 HTCLs.

**Key:** Main article bibliography reference // Taxonomy // Location // Article title

Compound number // Status // Compound name // Biological activity and Other information



## 6 Sponges

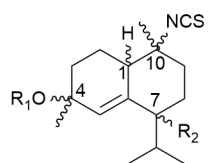

- †1085 1S, 4R, 7R, 10R, R<sub>1</sub> = R<sub>2</sub> = H  
 †1086 1R, 4S, 7S, 10S, R<sub>1</sub> = R<sub>2</sub> = H  
 †1087 1R, 4S, 7S, 10R, R<sub>1</sub> = R<sub>2</sub> = H  
 †1088 1S, 4R, 7R, 10S, R<sub>1</sub> = R<sub>2</sub> = H  
 †1089 1R, 4R, 7S, 10R, R<sub>1</sub> = R<sub>2</sub> = H  
 †1090 1S, 4S, 7R, 10S, R<sub>1</sub> = R<sub>2</sub> = H  
 †1091 1R, 4S, 7S, 10S, R<sub>1</sub> = Me, R<sub>2</sub> = H  
 †1092 1S, 4S, 7S, 10R, R<sub>1</sub> = H, R<sub>2</sub> = OH  
 †1093 1R, 4R, 7R, 10S, R<sub>1</sub> = H, R<sub>2</sub> = OH  
 †1094 1R, 4S, 7R, 10S, R<sub>1</sub> = Me, R<sub>2</sub> = OH  
 †1105 1R, 4R, 7S, 10S, R<sub>1</sub> = R<sub>2</sub> = H  
 †1106 1S, 4S, 7R, 10R, R<sub>1</sub> = R<sub>2</sub> = H  
 †1107 1R, 4R, 7S, 10S, R<sub>1</sub> = R<sub>2</sub> = OH  
 †1108 1S, 4S, 7R, 10R, R<sub>1</sub> = R<sub>2</sub> = OH

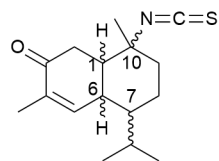

- †1095 1S, 6R, 7R, 10R  
 †1096 1R, 6S, 7S, 10S

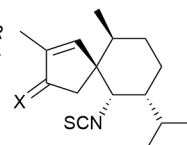

- †1097 X = O  
 †1098 X = H, .....OH  
 †1099 X = H, -OH

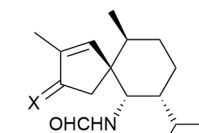

- †1100 X = O  
 †1101 X = H, .....OH  
 †1102 X = H, -OH

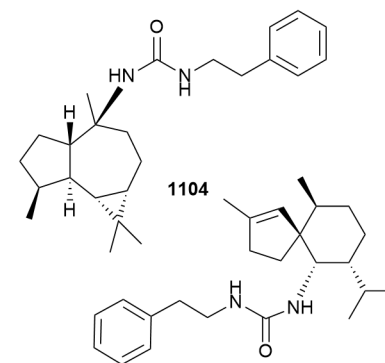

†1103

**408** Porifera *Acanthella cavernosa* // Ximao Island, Hainan Province, China // Nitrogenous sesquiterpenoids from the South China Sea nudibranch *Hexabranhus sanguineus* and its possible sponge-prey *Acanthella cavernosa*: chiral separation, stereochemistry and chemical ecology

- 1085** // N // (+)-ximaocavernosin A // NT; isol. as rac.  
**1086** // N // (-)-ximaocavernosin A // NT; isol. as rac.  
**1087** // N // (+)-ximaocavernosin B // NT; isol. as rac.  
**1088** // N // (-)-ximaocavernosin B // NT; isol. as rac.  
**1089** // N // (+)-ximaocavernosin C // NT; isol. as rac.  
**1090** // N // (-)-ximaocavernosin C // NT; isol. as rac.  
**1091** // N // ximaocavernosin D // NT.  
**1092** // N // (+)-ximaocavernosin E // NT; isol. as rac.  
**1093** // N // (-)-ximaocavernosin E // NT; isol. as rac.  
**1094** // N // ximaocavernosin F // NT.  
**1095** // N // (+)-ximaocavernosin G // NT; isol. as rac.  
**1096** // N // (-)-ximaocavernosin G // NT; isol. as rac.  
**1097** // N // ximaocavernosin H // NT.  
**1098** // N // ximaocavernosin I // NT.  
**1099** // N // ximaocavernosin J // NT.  
**1100** // N // ximaocavernosin K // NT.  
**1101** // N // ximaocavernosin L // NT.  
**1102** // N // ximaocavernosin M // NT.  
**1103** // N // ximaocavernosin N // NT.  
**1104** // N // ximaocavernosin O // NT.  
**1105** // R // (+)-axinisothiocyanate J // NT; isol. as rac.  
**1106** // R // (-)-axinisothiocyanate J // NT; isol. as rac.  
**1107** // R // (+)-axinisothiocyanate D // NT; isol. as rac.  
**1108** // R // (-)-axinisothiocyanate D // NT; isol. as rac.

Key: Main article bibliography reference // Taxonomy // Location // Article title

Compound number // Status // Compound name // Biological activity and Other information

## 6 Sponges

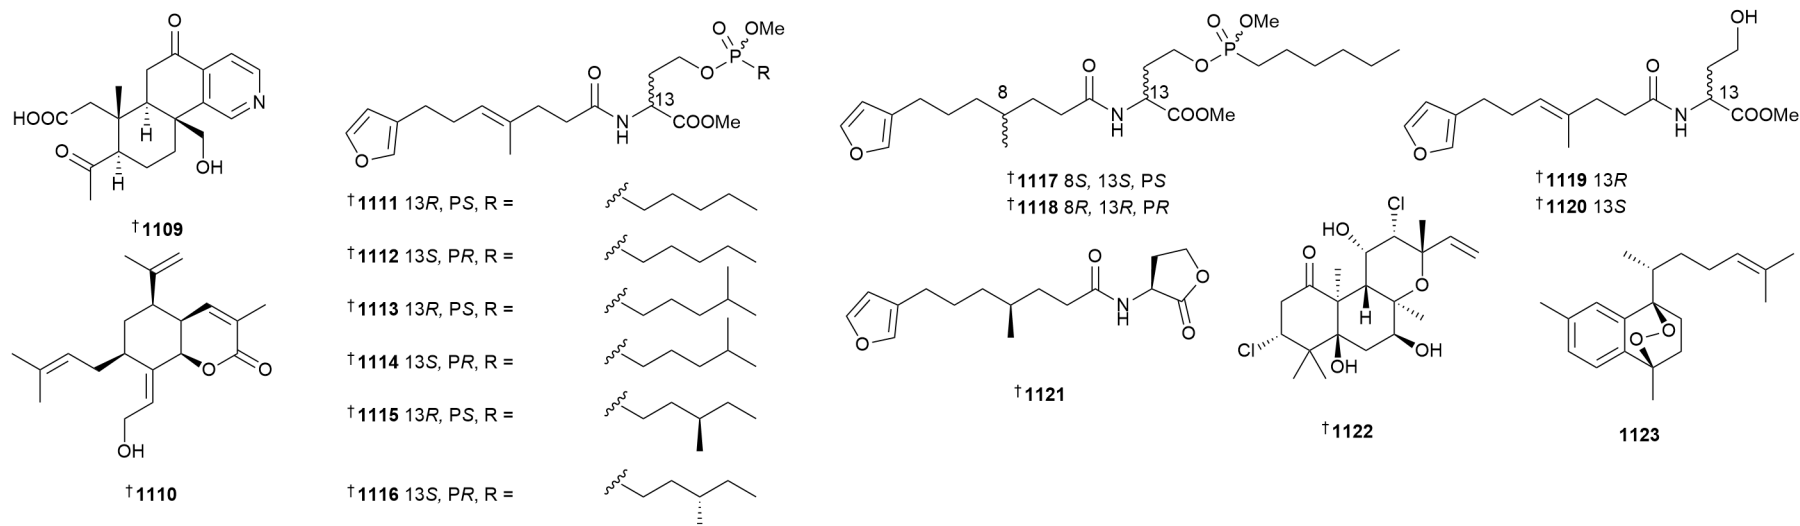

- 409** Porifera *Spongia* sp // Zhanjiang, Guangdong Province, China // A new dinorspongiapyridine with pyridyl D-ring from the marine sponge *Spongia* sp .  
**1109** // N // dinorspongiapyridine // IA vs 6 HTCLs.
- 410** Porifera *Spongia officinalis* // Shui Niupo Village, Danzhou City, Hainan Province, China // Jellynolide A, pokkepola esters, and sponalisolides from the aquaculture sponge *Spongia officinalis* L  
**1110** // N // jellynolide A // IA vs 4 HTCLs; IA vs HIF inhib.; IA vs NF-κB  
**1111** // N // (-)-pokkepola ester B // IA vs 4 HTCLs.  
**1112** // N // (+)-pokkepola ester B // IA vs 4 HTCLs.  
**1113** // N // (-)-pokkepola ester C // IA vs 4 HTCLs.  
**1114** // N // (+)-pokkepola ester C // IA vs 4 HTCLs; IA vs HIF inhib.; IA vs NF-κB  
**1115** // N // (-)-pokkepola ester D // IA vs 4 HTCLs.  
**1116** // N // (+)-pokkepola ester D // IA vs 4 HTCLs.  
**1117** // N // (-)-pokkepola ester E // IA vs 4 HTCLs.  
**1118** // N // (+)-pokkepola ester E // IA vs 4 HTCLs.  
**1119** // N // (-)-sponalisolide C // IA vs 4 HTCLs.  
**1120** // N // (+)-sponalisolide C // IA vs 4 HTCLs.  
**1121** // N // (-)-sponalisolide D // IA vs 4 HTCLs.
- 411** Porifera *Spongia* sp // Coast of Jeddah, Saudi Arabia // The chemically highly diversified metabolites from the Red Sea marine sponge *Spongia* sp .  
**1122** // N // spongianol // IA vs AI; IA vs elastase inhib.
- 412** Porifera *Halichondria* sp // Amitoi Bay, Iriomote Island, Japan // Amitorin, a cytotoxic diterpenoid from a sponge *Halichondria* sp .  
**1123** // N // amitorin // weak cytotox. vs 1 nMCL.

**Key:** Main article bibliography reference // Taxonomy // Location // Article title

Compound number // Status // Compound name // Biological activity and Other information

## 6 Sponges

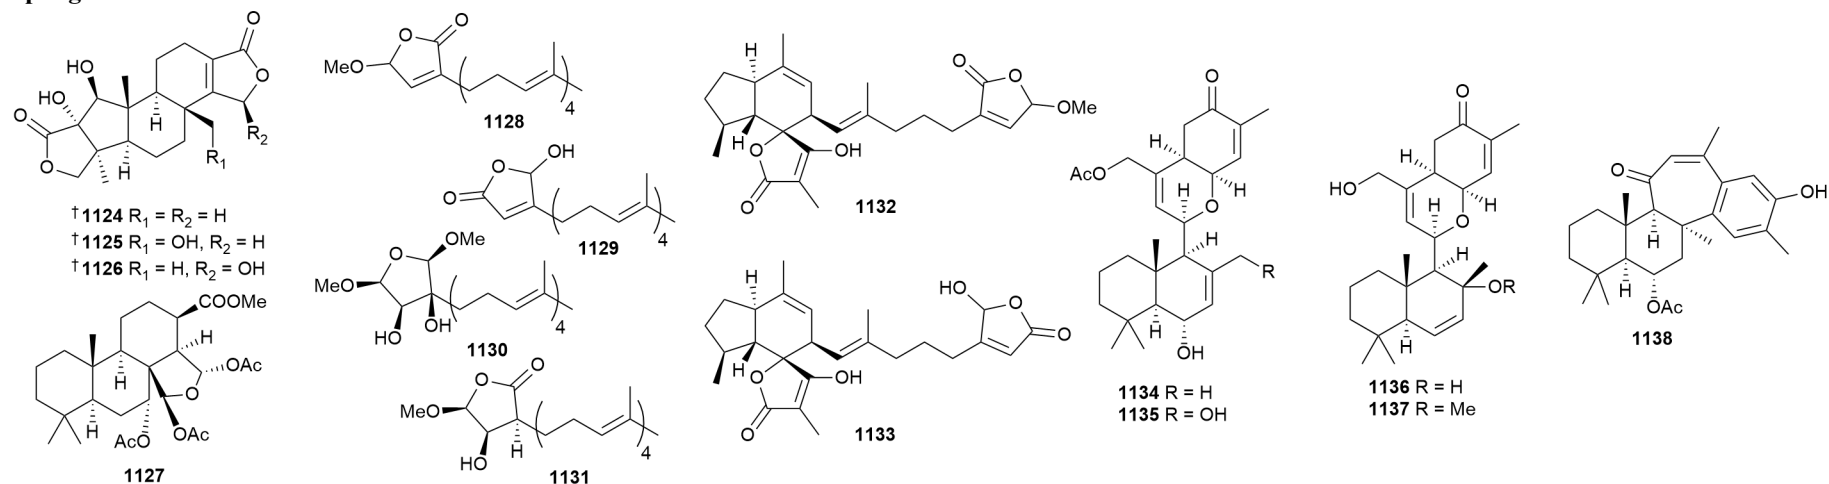

- 413** Porifera *Spongia* sp // Jeddah, Saudi Arabia // Spongenolactones A–C, bioactive 5,5,6,6,5-pentacyclic spongian diterpenes from the red sea sponge *Spongia* sp.  
**1124** // N // spongenolactone A // IA vs 1 HTCL; IA vs 1 bact. strain; IA vs anti-inflam.  
**1125** // N // spongenolactone B // IA vs 1 HTCL; IA vs 1 bact. strain; IA vs anti-inflam.  
**1126** // N // spongenolactone C // IA vs 1 HTCL; IA vs anti-inflam.
- 414** Porifera *Spongionella* sp // Dredge (82 m), Gulf of Sakhalin, Sea of Okhotsk, Pacific Ocean // New diterpenes from the marine sponge *Spongionella* sp. overcome drug resistance in prostate cancer by inhibition of P-glycoprotein  
**1127** // N // spongionellol A // weak to mod. cytotox. vs 7 HTCLs; IA to mod. cytotox. 3 of 4 nMCLs; induces caspase-dependent apoptosis.
- 415** Porifera *Hippospongia fistulosa* // Vanphong Bay, Nha Trang, Vietnam // Hippotuloses A–D: four new sesterterpenes from marine sponge *Hippospongia fistulosa* Lendenfeld, 1889  
**1128** // N // hippotulosa A // IA vs 5 HTCLs.  
**1129** // N // hippotulosa B // IA vs 5 HTCLs.  
**1130** // N // hippotulosa C // IA vs 5 HTCLs.  
**1131** // N // hippotulosa D // IA vs 5 HTCLs.
- 416** Porifera *Ircinia wistarii* // Wistari Reef, Great Barrier Reef, Australia // Discovery of ircinianin lactones B and C—two new cyclic sesterterpenes from the marine sponge *Ircinia wistarii*  
**1132** // N // ircinianin lactone B // NT; unstable.  
**1133** // N // ircinianin lactone C // NT; unstable.
- 417** Porifera *Phorbas* sp // Ansell Point, Howe Sound, British Columbia, Canada // Ansellone J, a potent *in vitro* and *ex vivo* HIV-1 latency reversal agent isolated from a *Phorbas* sp. marine sponge  
**1134** // N // ansellone H // NT.  
**1135** // N // ansellone I // NT.  
**1136** // M // ansellone J // mod. to pot. HIV-1 latency reversal act.  
**1137** // N // ansellone K // NT.  
**1138** // N // phorone C // mod. to pot. HIV-1 latency reversal act.

## 6 Sponges

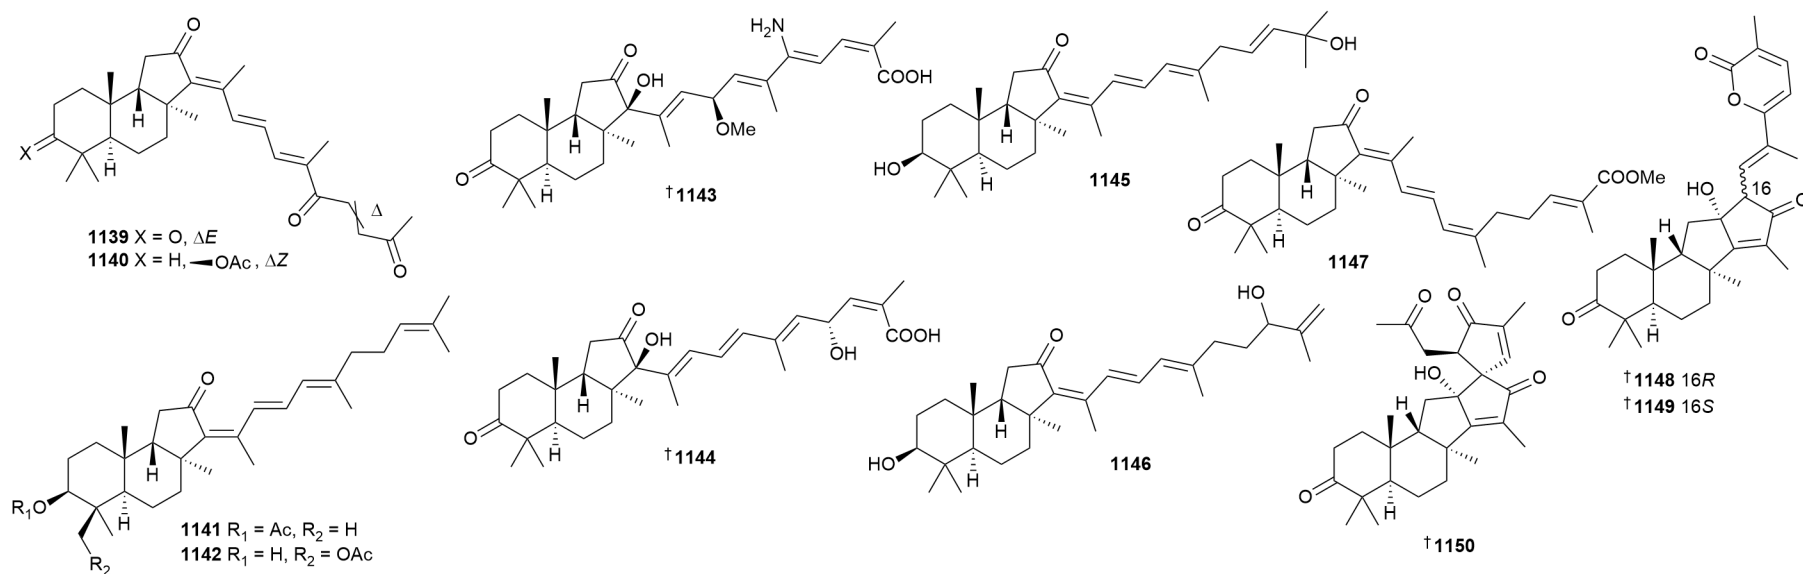

- 418** Porifera *Rhabdastrella globostellata* // Ximao Island, Hainan Province, China // Cytotoxic and antibacterial isomalabaricane terpenoids from the sponge *Rhabdastrella globostellata*
- 1139** // N // 13-(*E*)-geoditin A // weak cytotox. vs 1 of 6 HTCLs; mod. activ. vs 1 of 2 bact. strains.
- 1140** // N // 13-(*E*)-isogeoditin B // weak to mod. cytotox. vs 6 HTCLs; mod. activ. vs 1 of 2 bact. strains.
- 1141** // N // 3-acetylstelliferin D // IA vs 6 HTCLs; IA vs 2 bact. strains.
- 1142** // N // 29-acetylstelliferin D // IA vs 6 HTCLs; IA vs 2 bact. strains.
- 1143** // N // hainanstellin A // IA vs 6 HTCLs; IA vs 2 bact. strains.
- 1144** // N // hainanstellin B // IA vs 6 HTCLs; IA vs 2 bact. strains.
- 1145** // N // 23,24-ene-25-hydroxystelliferin D // weak cytotox. vs 1 of 6 HTCLs; IA vs 2 bact. strains.
- 1146** // N // 25,26-ene-24-hydroxystelliferin D // IA vs 6 HTCLs; IA vs 2 bact. strains.
- 1147** // N // hainanstellin C // weak cytotox. vs 1 of 6 HTCLs; IA vs 2 bact. strains.
- 419** Porifera *Rhabdastrella globostellata* // Vanphong Bay, Khanh Hoa, Vietnam // New tetracyclic and pentacyclic isomalabaricanes from the marine sponge *Rhabdastrella globostellata* (Carter, 1883)
- 1148** // N // rhabdaglostelone A // IA vs 4 HTCLs.
- 1149** // N // rhabdaglostelone B // IA vs 4 HTCLs.
- 1150** // N // rhabdaglostelone C // IA vs 4 HTCLs.

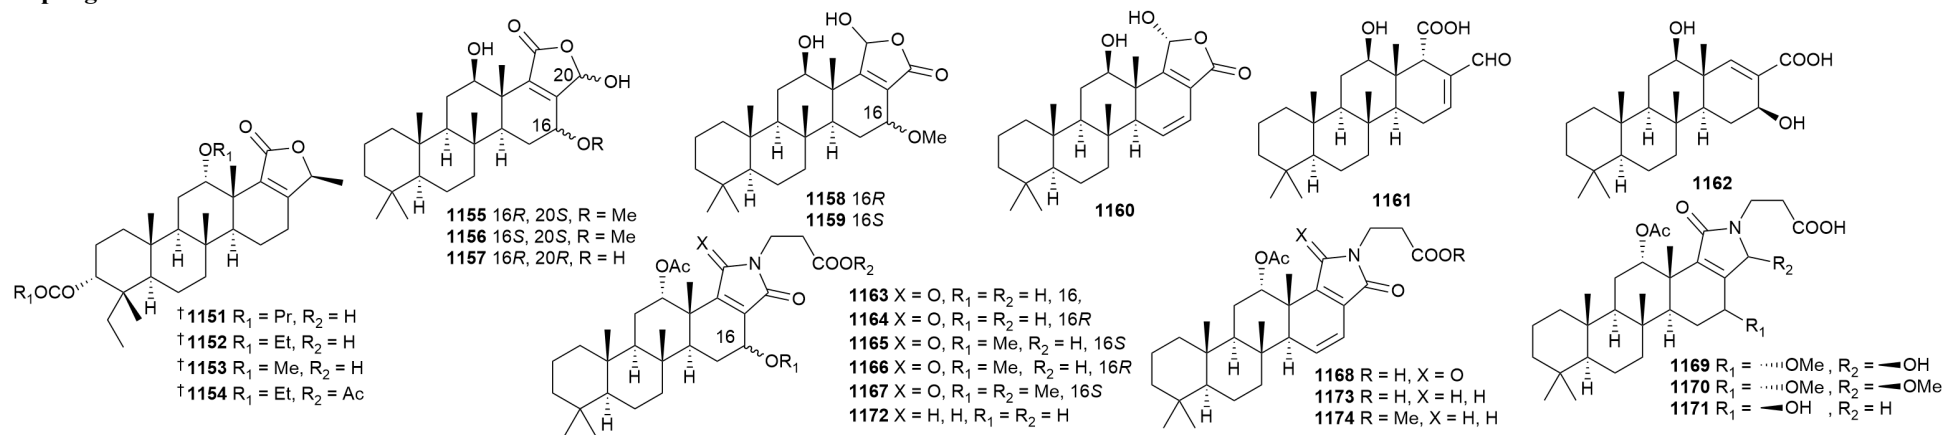

- 420** Porifera *Phyllospongia bergquistae* // Palfrey Island, Queensland, Australia // Identification of anthelmintic bishomoscalarane sesterterpenes from the Australian marine sponge *Phyllospongia bergquistae* and structure revision of phyllolactones A–D  
**1151** // R // phyllolactone A // IA vs nematode *Hemonchus contortus*.  
**1152** // R // phyllolactone B // weak cytotox. vs nematode *Hemonchus contortus*.  
**1153** // R // phyllolactone C // weak cytotox. vs nematode *Hemonchus contortus*.  
**1154** // R // phyllolactone D // weak cytotox. vs nematode *Hemonchus contortus*.
- 421** Porifera *Hyrtios erectus* // Bohol island, Philippines // Scalarane sesterterpenoids isolated from the marine sponge *Hyrtios erectus* and their cytotoxicity  
**1155** // N // 12 $\beta$ ,20 $\beta$ -dihydroxy-16 $\alpha$ -methoxy-17-scalaren-19,20-olide // IA vs 2 HTCLs.  
**1156** // N // 12 $\beta$ ,20 $\alpha$ -dihydroxy-16 $\beta$ -methoxy-17-scalaren-19,20-olide // IA vs 2 HTCLs.  
**1157** // N // 12 $\beta$ ,16 $\beta$ ,20 $\beta$ -trihydroxy-17-scalaren-19,20-olide // IA vs 2 HTCLs.  
**1158** // N // 12 $\beta$ ,19 $\alpha$ ( $\beta$ )-dihydroxy-16 $\alpha$ -methoxy-17-scalaren-19,20-olide // IA vs 2 HTCLs.  
**1159** // N // 12 $\beta$ ,19 $\alpha$ ( $\beta$ )-dihydroxy-16 $\beta$ -methoxy-17-scalaren-19,20-olide // IA vs 2 HTCLs.  
**1160** // N // 12 $\beta$ ,19 $\alpha$ -dihydroxy-14,15-dehydrate-17-scalaren-19,20-olide // IA vs 2 HTCLs.  
**1161** // N // 12-deacetyl-18-*epi*-carboxylic-12-*epi*-scalaral // IA vs 2 HTCLs.  
**1162** // N // 2-*O*-deacetyl-12,16-di-*epi*-norscalaral // IA vs 2 HTCLs.
- 422** Porifera *Spongia* sp // Bohol Province, Philippines // Isolation of scalimides A–L:  $\beta$ -alanine-bearing scalarane analogs from the marine sponge *Spongia* sp.  
**1163** // N // scalimide A // IA vs 1 HTCL; IA to weak activ. vs 2 of 6 bact. strains.  
**1164** // N // scalimide B // IA vs 1 HTCL; IA vs 6 bact. strains.  
**1165** // N // scalimide C // IA vs 1 HTCL; IA to mod. activ. vs 2 of 6 bact. strains.  
**1166** // N // scalimide D // IA vs 1 HTCL, IA to mod. activ. vs 2 of 6 bact. strains  
**1167** // N // scalimide E // IA vs 1 HTCL; IA vs 6 bact. strains.  
**1168** // N // scalimide F // IA vs 1 HTCL; IA to weak activ. vs 2 of 6 bact. strains.  
**1169** // N // scalimide G // IA vs 1 HTCL; IA to weak activ. vs 2 of 6 bact. strains.  
**1170** // N // scalimide H // IA vs 1 HTCL; IA to mod. activ. vs 2 of 6 bact. strains.  
**1171** // N // scalimide I // IA vs 1 HTCL; IA vs 6 bact. strains.

## 6 Sponges

**1172** // N // scalimide J // IA vs 1 HTCL; IA to mod. activ. vs 3 of 6 bact. strains.

**1173** // N // scalimide K // IA vs 1 HTCL; IA to mod. activ. vs 3 of 6 bact. strains.

**1174** // N // scalimide L // IA vs 1 HTCL; IA vs 6 bact. strains.

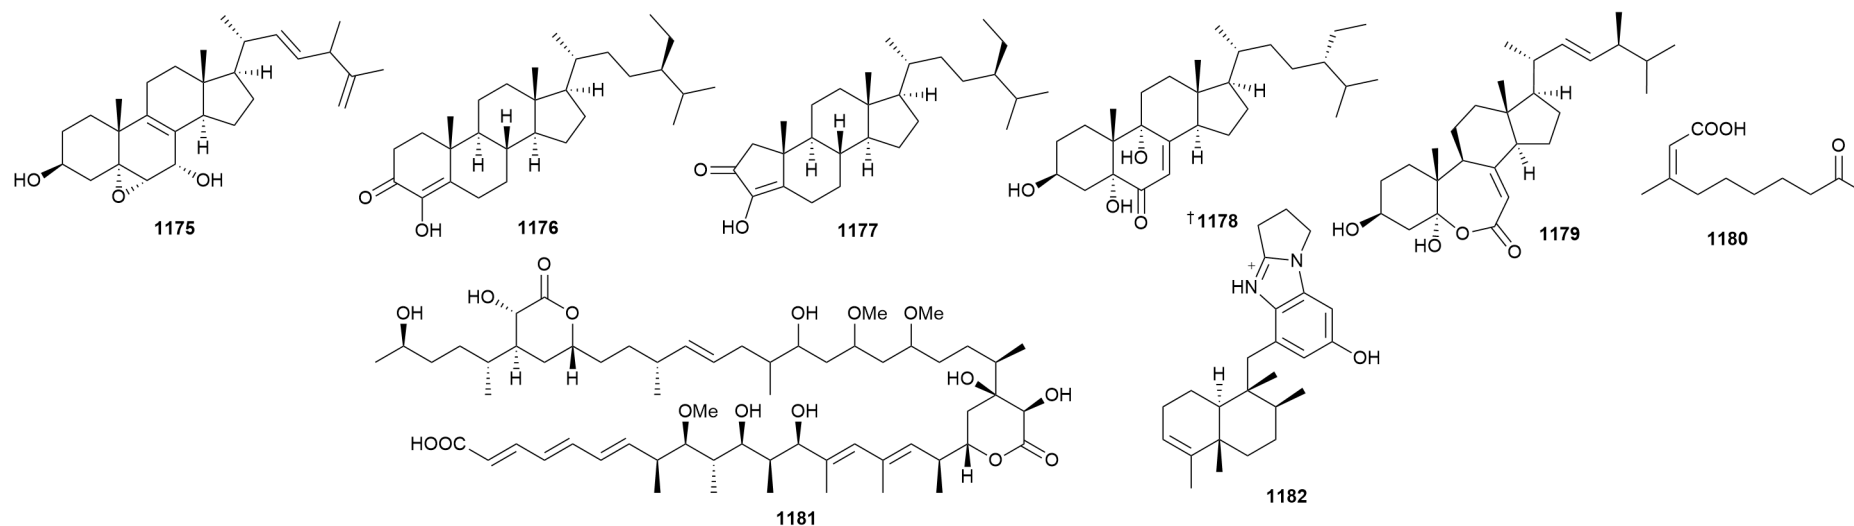

**423** Porifera *Halichondria panicea* // Vanphong, Nhatrang, Vietnam // Halipanasterol, a new sterol isolated from the marine sponge *Halichondria panicea*

**1175** // N // halipanasterol // IA to weak cytotox. vs 4 HTCLs .

**424** Porifera *Neopetrosia chaliniformis* // Xidao Is., Hainan Province, China // Xidaosterols A and B, two new steroids with unusual  $\alpha$ -keto-enol functionality from the South China Sea sponge *Neopetrosia chaliniformis*

**1176** // N // xidaosterol A // IA vs PTP1b; IA vs bact. strain.

**1177** // N // xidaosterol B // IA vs PTP1b; IA vs bact. strain.

**411** Porifera *Spongia* sp // Coast of Jeddah, Saudi Arabia // The chemically highly diversified metabolites from the Red Sea marine sponge *Spongia* sp.

**1178** // N //  $3\beta,5\alpha,9\alpha$ -trihydroxy-24S-ethylcholest-7-en-6-one // IA vs anti-inflam.; IA vs elastase inhib.

**1179** // M // (22E,24S)-ergosta-7,22-dien-3 $\beta$ ,5 $\alpha$ -diol-6,5-olide // IA vs anti-inflam.; IA vs elastase inhib.

**1180** // N // (Z)-3-methyl-9-oxodec-2-enoic acid // IA vs anti-inflam.; IA vs elastase inhib.

**435** Porifera *Hemimycale* sp // // A synthesis-enabled relative configurational assignment of the C31–C46 region of hemicalide

**1181** // R // hemimycalide // configuration of some stereocentres have been assigned by synthesis

**3** Porifera *Dysidea cinerea* // // DU8ML: machine learning-augmented density functional theory nuclear magnetic resonance computations for high-throughput in silico solution structure validation and revision of complex alkaloids

**1182** // R // cinerol A // Revised by comput. approaches.

## 7 Cnidarians

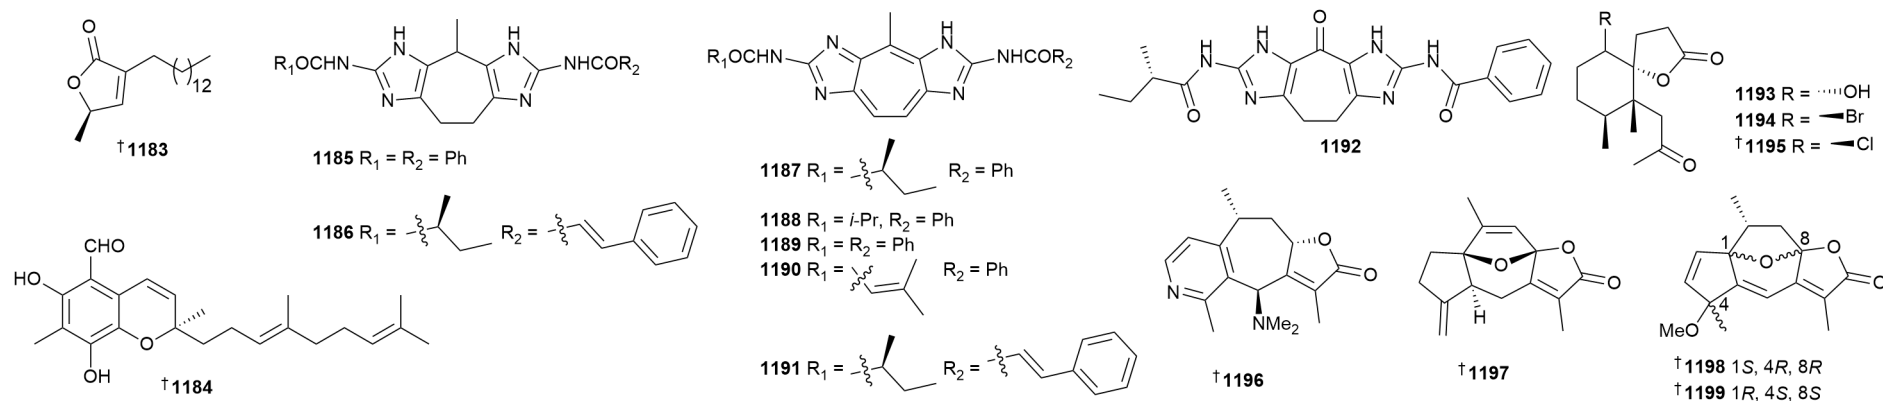

- 482 Cnidaria *Cladiella confiera* // Penghu Archipelago, Taiwan // A new natural butenolide, (5*R*)-3-tetradecyl-5-methyl-2(5*H*)-furanone, from octocoral *Cladiella confiera*  
**1183** // M // (5*R*)-3-tetradecyl-5-methyl-2(5*H*)-furanone // weak inhib. COX-2 release.
- 483 Cnidaria *Duva florida* // Irish Sea // Tuaimenal A, a meroterpene from the Irish deep-sea soft coral *Duva florida*, displays inhibition of the SARS-CoV-2 3CLpro enzyme  
**1184** // N // tuaimenal A // IA inhib. SARS-CoV-2 3CLpro.
- 484 Cnidaria *Dentitheca habereri*, Cnidaria *Plumularia habereri* // Palau // Dentithecamides A–H, diacylated zoanthoxanthin derivatives with PAX3-FOXO1 inhibitory activity from the hydroid *Dentitheca habereri*  
**1185** // N // dentithecamide A // IA vs PAX3-FOXO1-driven transcription.  
**1186** // N // dentithecamide B // IA vs PAX3-FOXO1-driven transcription.  
**1187** // N // dentithecamide C // IA vs PAX3-FOXO1-driven transcription.  
**1188** // N // dentithecamide D // IA vs PAX3-FOXO1-driven transcription.  
**1189** // N // dentithecamide E // IA vs PAX3-FOXO1-driven transcription.  
**1190** // N // dentithecamide F // NT.  
**1191** // N // dentithecamide G // NT.  
**1192** // N // dentithecamide H // NT.
- 486 Cnidaria *Paralemnalia thyrsoides* // // Norsesquiterpenoids from the octocoral *Paralemnalia thyrsoides* (Ehrenberg 1834)  
**1193** // N // pathyspirolactone A // IA vs anti-inflam.; IA vs 1 nMCL.  
**1194** // N // pathyspirolactone B // IA vs anti-inflam; IA vs 1 nMCL.  
**1195** // R // napalilactone //
- 487 Cnidaria *Echinogorgia flora* // Weizhou Island, South China Sea // Guaiane sesquiterpenes from the gorgonian *Echinogorgia flora* collected in the South China Sea  
**1196** // N // echinoflorine // IA vs anti-inflam.  
**1197** // N // echinofloranolide A // IA vs anti-inflam.  
**1198** // N // echinofloranolide B // IA vs anti-inflam.  
**1199** // N // echinofloranolide C // IA vs anti-inflam.

Key: Main article bibliography reference // Taxonomy // Location // Article title

Compound number // Status // Compound name // Biological activity and Other information

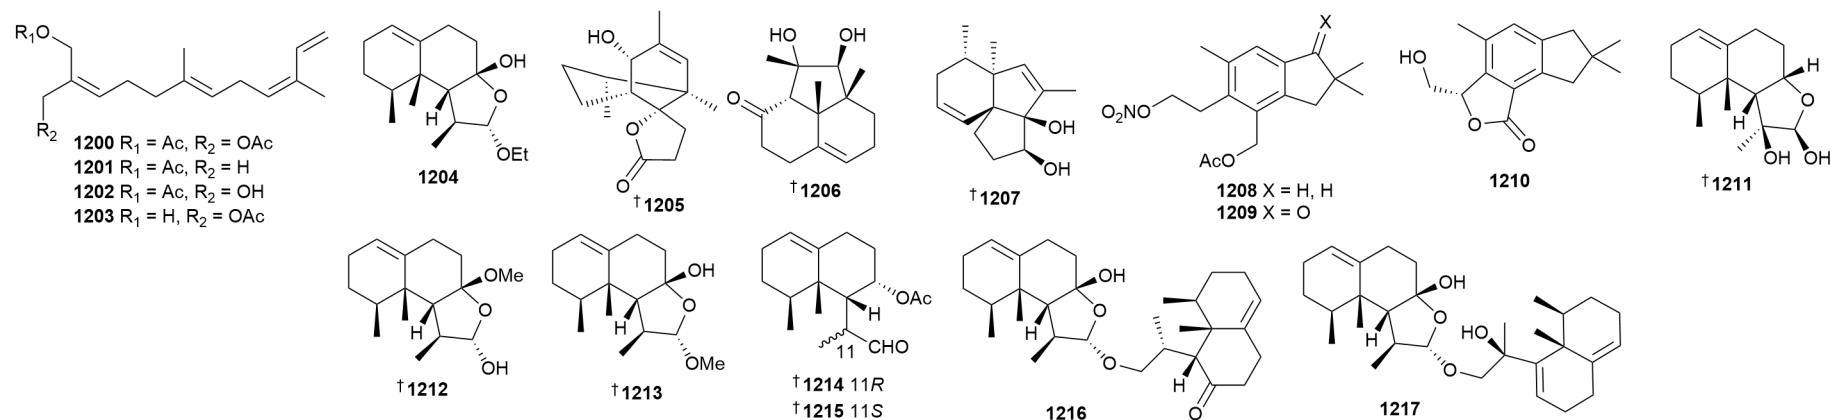

- 488** Cnidaria *Acanella arbuscula* // Whittard Canyon, Porcupine Bank, Ireland // Crannenols A–D, sesquiterpenoids from the Irish deep-sea soft coral *Acanella arbuscula*  
**1200** // N // crannenol A // IA vs multiple bact. strains; IA vs fungal strains; IA vs 1 virus.  
**1201** // N // crannenol B // NT.  
**1202** // N // crannenol C // NT.  
**1203** // N // crannenol D // NT.
- 489** Cnidaria *Lemnalia* sp // Ghuan Bay, North Borneo // New bioactive sesquiterpenoid from Malaysian soft coral genus *Lemnalia*  
**1204** // N // parathyrsoidin K // NT.
- 490** Cnidaria *Paralemnalia thyrsoides*, Cnidaria *Lemnalia* sp // Xisha Islands, South China Sea // Lemnalemnanes A–C, three rare rearranged sesquiterpenoids from the soft corals *Paralemnalia thyrsoides* and *Lemnalia* sp.  
**1205** // N // lemnalemnane A // Reduce no. macrophages in zebrafish; XRD.  
**1206** // N // lemnalemnane B // Reduce no. macrophages in zebrafish.  
**1207** // N // lemnalemnane C // Promote angiogenesis in zebrafish; XRD.
- 491** Cnidaria *Alcyonium* sp // Antarctica // Chemistry and bioactivity of the deep-water Antarctic octocoral *Alcyonium* sp.  
**1208** // N // alcyopterosin T // NT.  
**1209** // N // alcyopterosin U // NT.  
**1210** // N // alcyopterosin V // weak activ. vs 1 bact. strain; weak activ. vs *L. donovani*; IA vs 3 MCLs.
- 492** Cnidaria *Lemnalia* sp // Xisha Island, China // Nardosinane-related antimicrobial terpenoids from *Lemnalia* sp. soft coral  
**1211** // N // parathyrsoidin H // IA vs 1 virus; IA vs 5 bact. strains; IA vs 4 HTCLs.  
**1212** // N // parathyrsoidin I // weak activ. vs 1 virus; IA vs 5 bact. strains; IA vs 4 HTCLs.  
**1213** // N // parathyrsoidin J // IA vs 1 virus; IA vs 5 bact. strains; IA vs 4 HTCLs.  
**1214** // N // linardosinene D // IA vs 1 virus; IA vs 5 bact. strains; IA vs 4 HTCLs.  
**1215** // N // linardosinene E // weak activ. vs 1 virus; IA vs 5 bact. strains; IA vs 4 HTCLs.  
**1216** // N // nardosinoid A // weak activ. vs 2 bact. strains; IA vs 1 virus; IA vs 5 HTCLs.  
**1217** // N // nardosinoid B // weak activ. vs 2 bact. strains; IA vs 1 virus; IA vs 5 HTCLs.

**Key:** Main article bibliography reference // Taxonomy // Location // Article title

Compound number // Status // Compound name // Biological activity and Other information



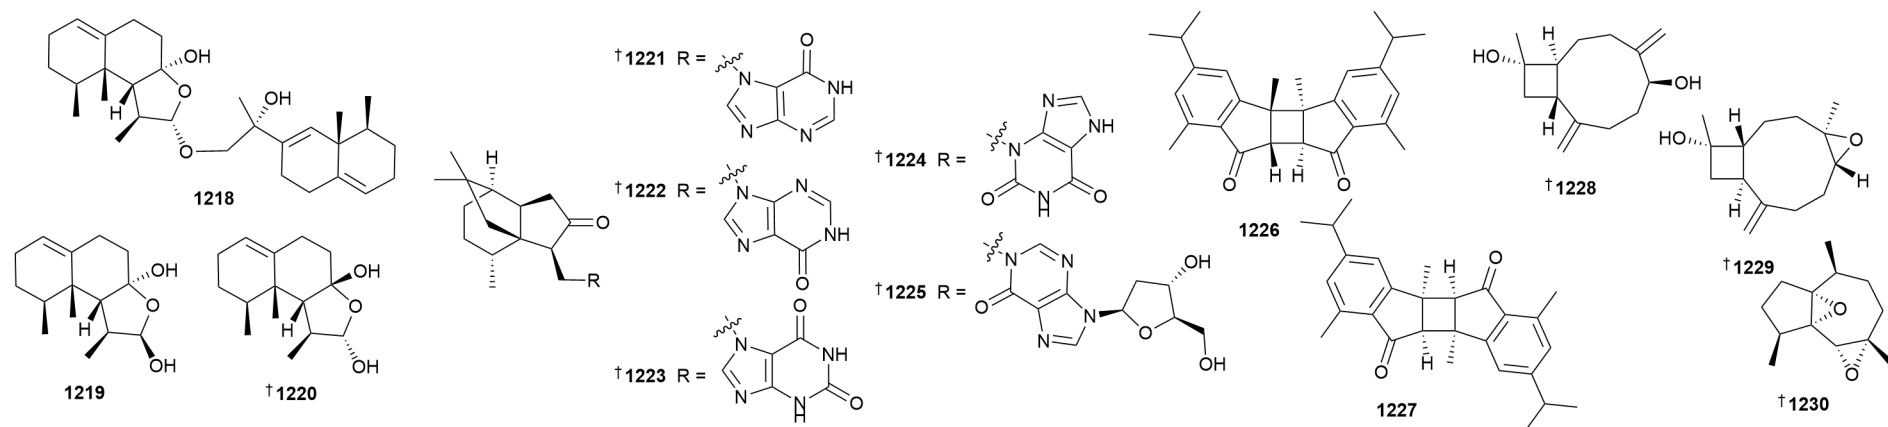

- 493** Cnidaria *Litophyton nigrum* // South China Sea // One uncommon *bis*-sesquiterpenoid from Xisha soft coral *Litophyton nigrum*  
**1218** // N // linardosinene H // IA vs 1 enzyme; IA vs 4 HTCLs.  
**1219** // N // linardosinene I // weak inhib. vs 1 enzyme; IA vs 4 HTCLs.  
**1220** // R // lemnal-1(10)-ene-7,12-diol // IA vs 1 enzyme; IA vs 4 HTCLs.
- 496** Cnidaria *Subergorgia suberosa* // Meishan coast, South China Sea, Hainan Province // Subergorgines A–E, five new suberosanone-purine hybrids from the South China Sea gorgonian *Subergorgia suberosa*  
**1221** // N // subergorgine A // IA vs 3 HTCLs.  
**1222** // N // subergorgine B // IA vs 3 HTCLs.  
**1223** // N // subergorgine C // IA vs 3 HTCLs.  
**1224** // N // subergorgine D // IA vs 3 HTCLs.  
**1225** // N // subergorgine E // NT.
- 495** Cnidaria *Anthogorgia ochracea* // Weizhou Island, Guangxi Province, China // Weizhouochrones: gorgonian-derived symmetric dimers and their structure elucidation using anisotropic NMR combined with DP4+ probability and CASE-3D  
**1226** // N // weizhouchrone A // NT.  
**1227** // N // weizhouchrone B // NT.
- 494** Cnidaria *Sinularia hirta* // Yalong bay, Sanya, China // Sinuhirtone A, an uncommon 17,19-dinorxeniaphyllanoid, and related terpenoids from the Hainan soft coral *Sinularia hirta*  
**1228** // N // sinuhirtin F // NT.  
**1229** // N // sinuhirtin G // NT.
- 497** \* // \* // First synthesis, confirmation of stereochemistry, and cytotoxic activity of oxyfungiformin  
**1230** // R // oxyfungiformin // IA vs 4 HTCLs; abs. config. by synth; XRD.

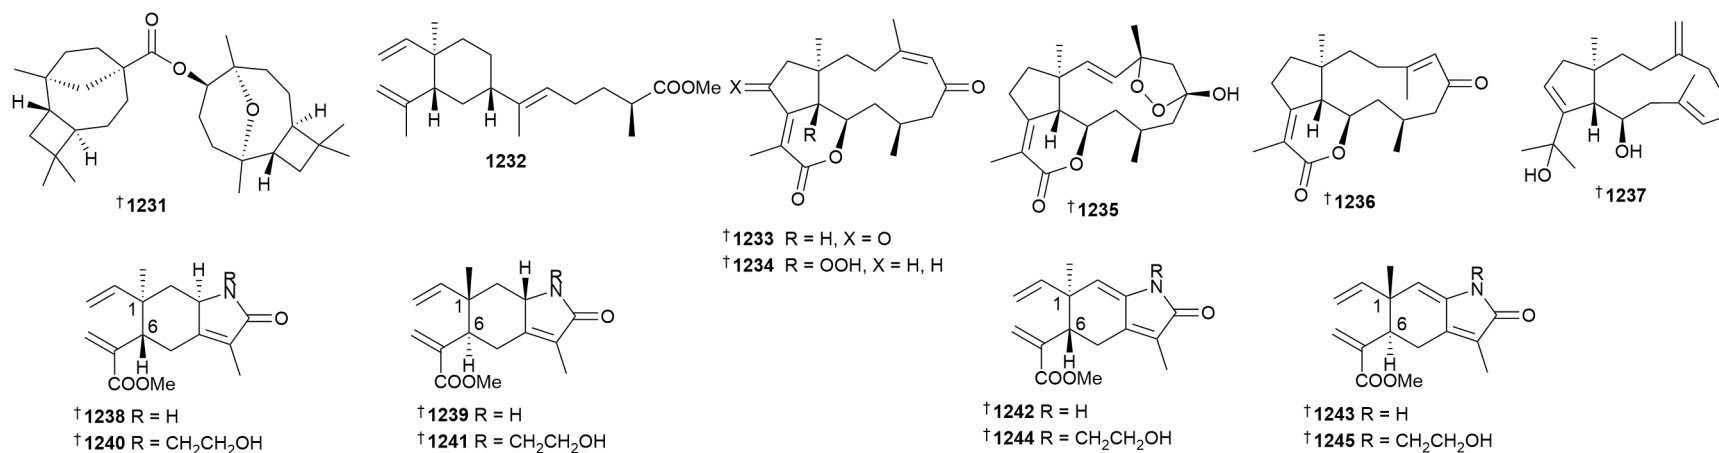

498 \* // \* // Convergent biomimetic semisynthesis of disesquiterpenoid rumphellolide J

1231 // R // rumphellolide J // Abs. config. by synth; XRD.

499 Cnidaria *Simularia nanolobata* // Ximao Island, Sanya, South China Sea // Chemical constituents of *Simularia nanolobata* from the South China Sea

1232 // N // lobatate // IA vs PTP1B.

500 Cnidaria *Clavularia inflata* // Xisha Islands, South China Sea // Dolabellane diterpenes and elemene alkaloids from the soft coral *Clavularia inflata* collected in the South China Sea

1233 // N // clavularinlide A // IA vs anti-inflam. zebrafish model.

1234 // N // clavularinlide B // IA vs anti-inflam. zebrafish model.

1235 // N // clavularinlide C // IA vs anti-inflam. zebrafish model.

1236 // N // clavularinlide D // IA vs anti-inflam. zebrafish model.

1237 // N // clavularinlide E // IA vs anti-inflam. zebrafish model.

1238 // N // (-)-clavulacylide A // IA vs anti-inflam. zebrafish model.

1239 // N // (+)-clavulacylide A // IA vs anti-inflam. zebrafish model.

1242 // R // (-)-clavulacylide B; corrected in ref 3. // NT.

1243 // R // (+)-clavulacylide B; corrected in ref 3 // NT.

1240 // N // (-)-clavulacylide C // NT.

1241 // N // (+)-clavulacylide C // NT.

1244 // R // (-)-clavulacylide D; corrected in ref 3. // NT.

1245 // R // (+)-clavulacylide D; corrected in ref 3. // NT.

7 Cnidarians

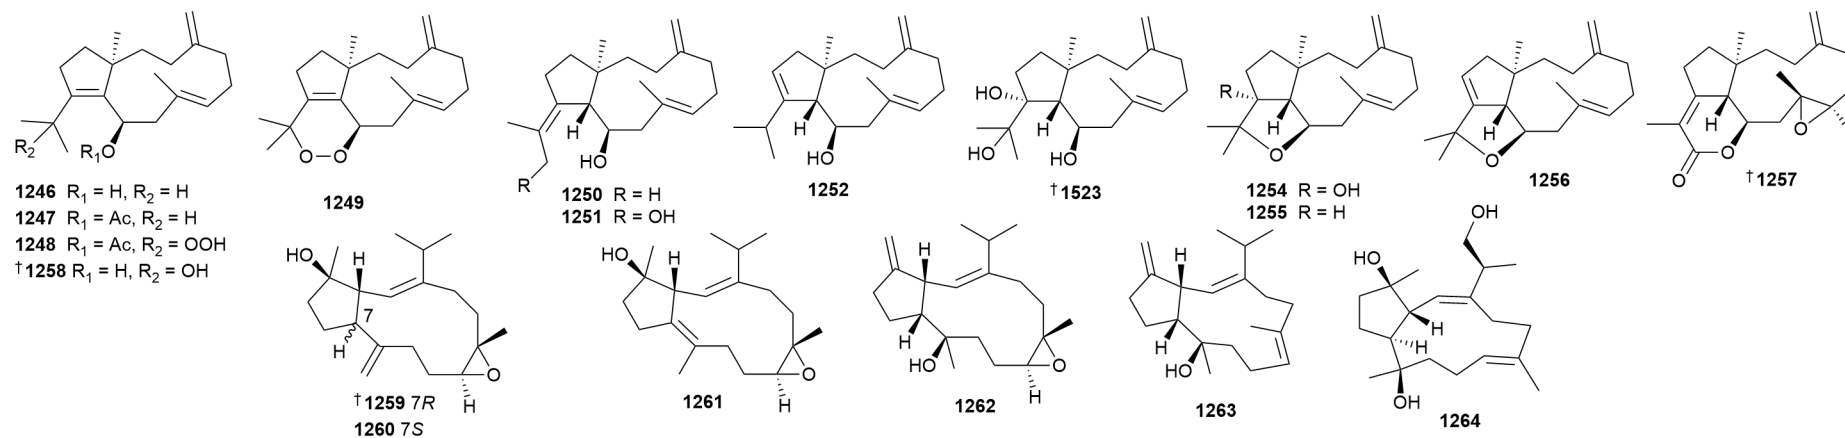

**501** Cnidaria *Clavularia viridis* // Xisha Islands, Hainan Province, China // Dolabellane diterpenoids from the Xisha soft coral *Clavularia viridis*

- 1246** // N // clavurool A // IA vs 2 TCLs; IA inhib. PTP1B.  
**1247** // N // clavurool B // IA vs 2 TCLs; IA inhib. PTP1B.  
**1248** // N // clavuperoxylyde A // IA vs 2 TCLs; IA inhib. PTP1B.  
**1249** // N // clavuperoxylyde B // IA vs 2 TCLs; IA inhib. PTP1B.  
**1250** // N // clavurool C // IA vs 2 TCLs; IA inhib. PTP1B.  
**1251** // N // clavurool D // IA vs 2 TCLs; IA inhib. PTP1B.  
**1252** // N // clavurool E // IA vs 2 TCLs; IA inhib. PTP1B.  
**1253** // N // clavurool F // IA vs 2 TCLs; IA inhib. PTP1B; XRD.  
**1254** // N // clavufuranolide A // IA vs 2 TCLs; IA inhib. PTP1B.  
**1255** // N // clavufuranolide B // IA vs 2 TCLs; IA inhib. PTP1B.  
**1256** // N // clavufuranolide C // IA vs 2 TCLs; IA inhib. PTP1B.  
**1257** // N // clavirolide I // IA vs 2 TCLs; IA inhib. PTP1B; XRD.  
**1258** // R // clavudiol A // IA vs 2 TCLs; IA inhib. PTP1B; XRD.

**502** Cnidaria *Sarcophyton boettgeri* // Weizhou Island, Hainan Province, China // Uncommon capnosane diterpenes with neuroprotective potential from South China Sea soft coral *Sarcophyton boettgeri*

- 1259** // N // sarboettgerin A // IA vs anti-inflam.; XRD.  
**1260** // N // sarboettgerin B // IA vs anti-inflam.  
**1261** // N // sarboettgerin C // IA vs anti-inflam.  
**1262** // N // sarboettgerin D // IA vs anti-inflam.  
**1263** // N // sarboettgerin E // IA vs anti-inflam.

**503** Cnidaria *Simularia humilis* // Ximao Island, China // Chemical constituents from the South China sea soft coral *Simularia humilis*

- 1264** // N // sinuhumilol A // IA vs 4 HTCLs.

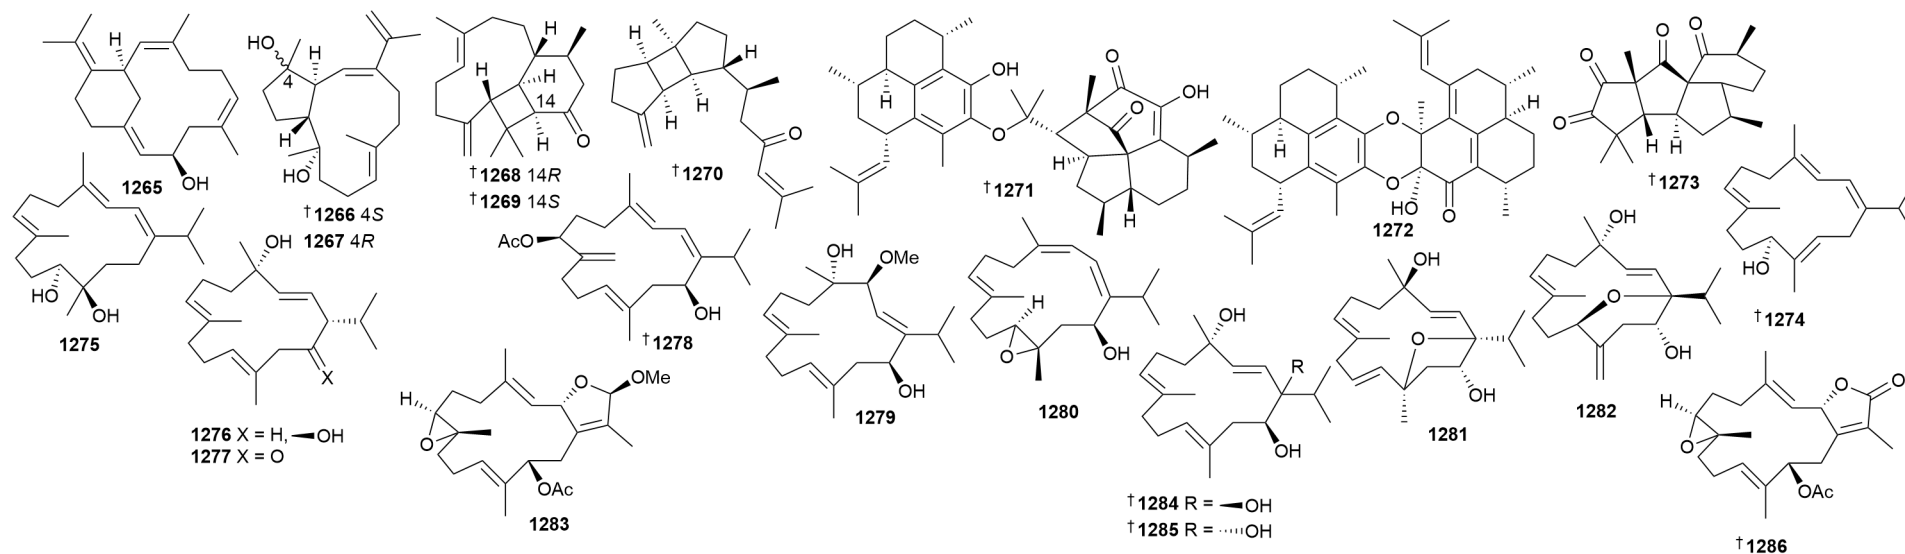

- 504** Cnidaria *Sarcophyton mililatensis* // Xigu Island, Hainan Province, China // Mililatensols A–C, new records of sarsolenane and capnosane diterpenes from soft coral *Sarcophyton mililatensis*  
**1265** // N // mililatensol A // IA vs anti-inflam.  
**1266** // N // mililatensol B // IA vs anti-inflam.  
**1267** // N // mililatensol C // IA vs anti-inflam.
- 505** Cnidaria *Sinularia australiensis* // Ximao Island, Hainan province, China // Discovery and photosynthesis of sinuaustones A and B, diterpenoids with a novel carbon scaffold isolated from soft coral *Sinularia australiensis* from Hainan  
**1268** // N // sinuaustone A // IA vs NO prod.  
**1269** // N // sinuaustone B // IA vs NO prod.  
**1270** // N // isolobophytumin E // weak inhib. NO prod.
- 506** Cnidaria *Pseudopterogorgia elisabethae* // San Andrés Island, Colombia // Isolation, structural analysis and biological activity assays of biselisabethoxanes A and B: two dissymmetric bis-diterpenes from the southwestern Caribbean Sea gorgonian coral *Pseudopterogorgia elisabethae*  
**1271** // N // biselisabethoxane A // IA vs large panel of assays.  
**1272** // N // biselisabethoxane B // IA vs large panel of assays.
- 509** \* // \* // Enantioselective total synthesis of (+)-aberrarone  
**1273** // R // (+)-aberrarone // Abs. config. by synth; XRD.
- 510** Cnidaria *Sarcophyton glaucum* // Xisha Island, Hainan Province, China // Xishaglaucumins A–J, new cembranoids with anti-inflammatory activities from the South China Sea soft coral *Sarcophyton glaucum*  
**1274** // N // xishaglaucumin A // NT.  
**1275** // N // xishaglaucumin B // NT.  
**1276** // N // xishaglaucumin C // NT.

**Key:** Main article bibliography reference // Taxonomy // Location // Article title

Compound number // Status // Compound name // Biological activity and Other information

## Cnidarians

- 1277 // N // xishaglaucumin D // IA vs anti-inflam.  
 1278 // N // xishaglaucumin E // NT.  
 1279 // N // xishaglaucumin F // NT.  
 1280 // N // xishaglaucumin G // NT.  
 1281 // N // xishaglaucumin H // NT.  
 1282 // N // xishaglaucumin I // NT.  
 1283 // N // xishaglaucumin J // NT.  
 1284 // R // sarcophytol Q // NT; XRD.  
 1285 // R // iso-sarcophytol Q // NT; XRD.  
 1286 // R // 13-acetoxy-7,8-epoxycembra-1(15),3,11-trien-2,16-olide // NT; XRD.

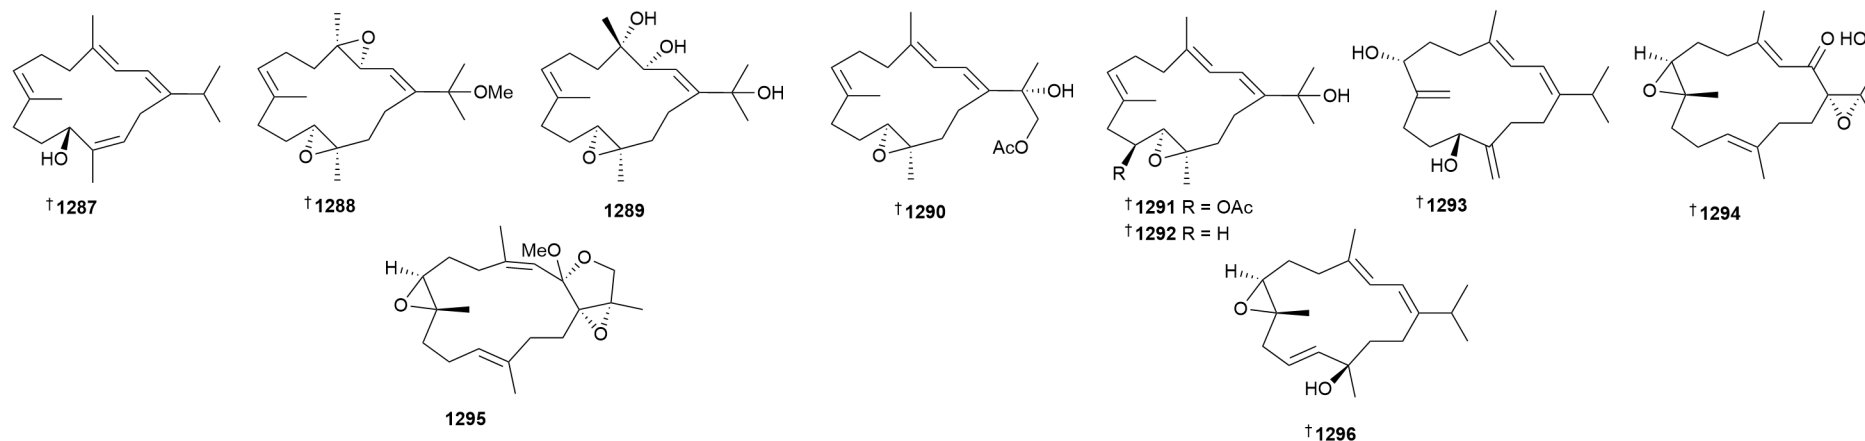

- 511 Cnidaria *Sarcophyton mililatensis* // Xigu Island, Hainan province, China // New flexible cembra-type macrocyclic diterpenes as TNF- $\alpha$  inhibitors from the South China Sea soft coral *Sarcophyton mililatensis*  
 1287 // N // sarcomililatol C // NT.  
 1288 // N // sarcomililatol D // weak inhib. TNF- $\alpha$ .; XRD  
 1289 // N // sarcomililatol E // NT.  
 1290 // N // sarcomililatol F // NT.  
 1291 // N // sarcomililatol G // NT.  
 1292 // R // 11,12-epoxy-1E,3E,7E-cembratrien-15-ol // NT; XRD.
- 512 Cnidaria *Sarcophyton boettgeri* // Ximao Island, Hainan province, China // Polyoxygenated cembranoids from the South China Sea soft coral *Sarcophyton boettgeri* and their stereochemistry  
 1293 // N // sarcoboettgerol A // IA vs PTP1B; XRD  
 1294 // N // sarcoboettgerol B // IA vs PTP1B.  
 1295 // N // sarcoboettgerol C // IA vs PTP1B.  
 1296 // N // 12-*epi*-humilisin D // IA vs PTP1B.

Key: Main article bibliography reference // Taxonomy // Location // Article title

Compound number // Status // Compound name // Biological activity and Other information

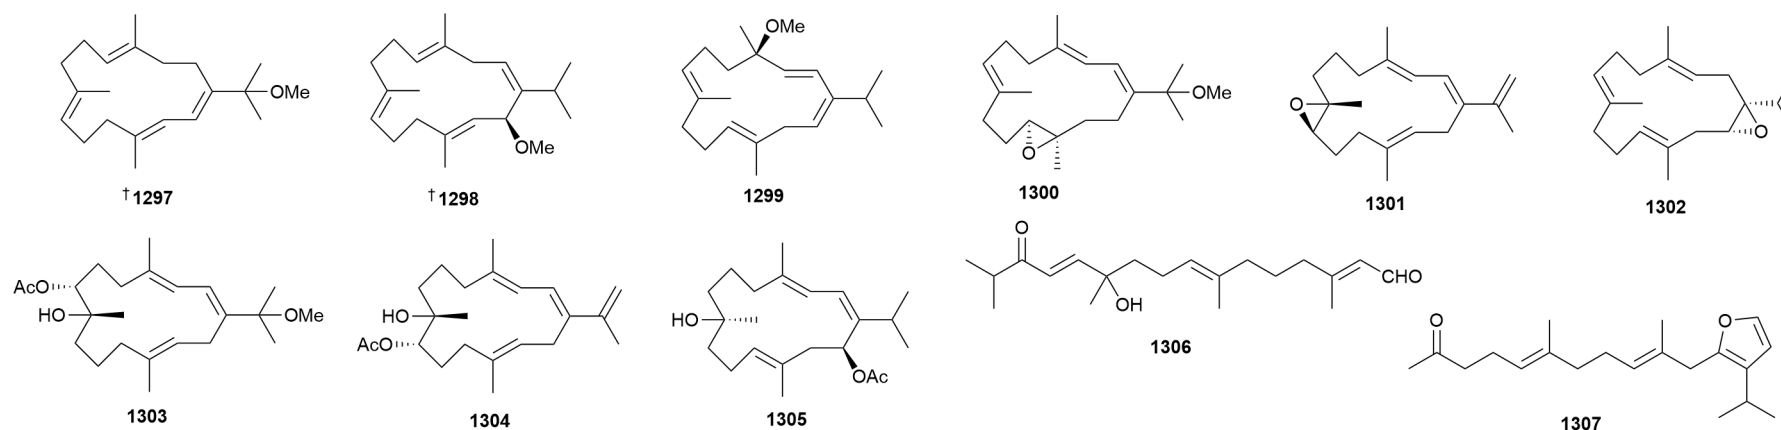

- 513** Cnidaria *Sarcophyton trocheliophorum* // Ximao Island, Hainan Province, China // Bioactive cembranoids from the coral *Sarcophyton trocheliophorum* of Ximao Island  
**1297** // N // sarcophytembranoid A // NT; XRD.  
**1298** // N // sarcophytembranoid B // NT.  
**1299** // N // sarcophytembranoid C // IA vs NO prod.  
**1300** // N // sarcophytembranoid D // NT.  
**1301** // N // sarcophytembranoid E // NT.  
**1302** // N // sarcophytembranoid F // IA vs NO prod.  
**1303** // N // sarcophytembranoid G // IA vs NO prod.  
**1304** // N // sarcophytembranoid H // IA vs NO prod.  
**1305** // M // (1*R*,2*Z*,4*E*,7*Z*,9*R*,12*E*)-9-hydroxy-2-isopropyl-5,9,13-trimethylcyclotetradeca-2,4,7,12-tetraen-1-yl acetate // IA vs NO prod.  
**1306** // M // (2*E*,7*E*,12*E*)-11-hydroxy-2,7,11,15-tetramethyl-14-oxohexadeca-2,7,12-trienal // IA vs NO prod.  
**1307** // M // (5*E*,9*E*)-11-(3-isopropylfuran-2-yl)-6,10-dimethylundeca-5,9-dien-2-one // NT.

7 Cnidarians

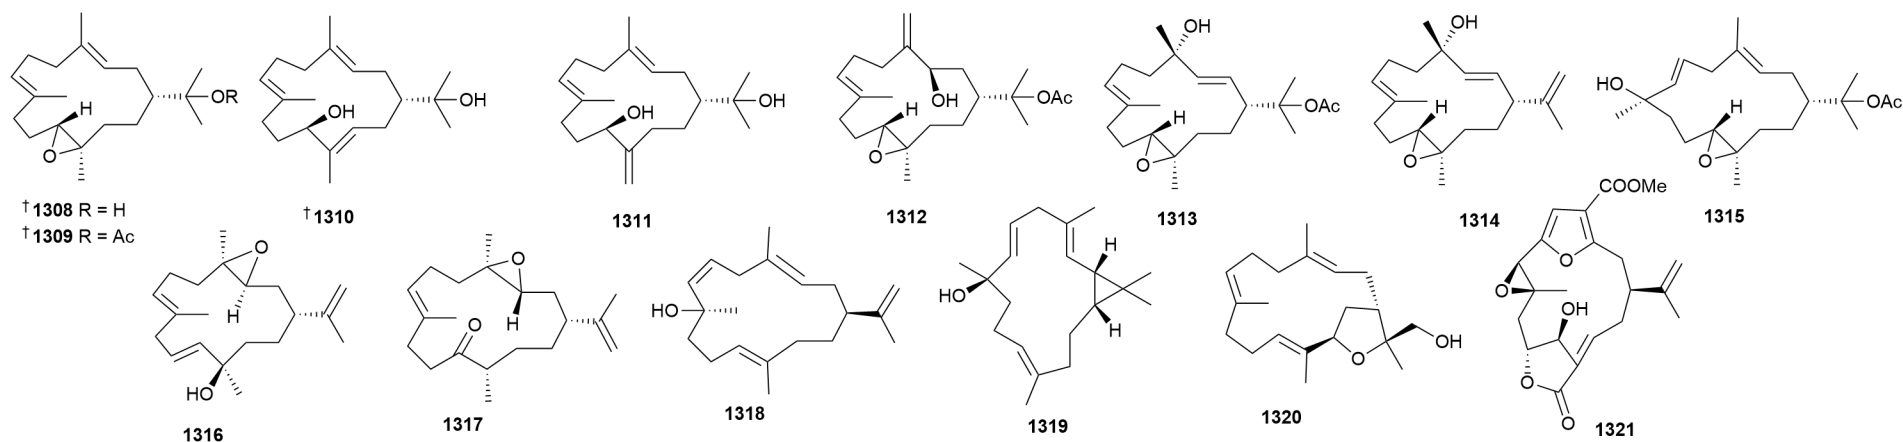

- 514** Cnidaria *Simularia nanolobata* // Ximao Island, Hainan Province, China // New cembrane-type diterpenoids from the South China Sea soft coral *Simularia nanolobata*  
**1308** // N // ximaonanobatin A // IA vs TNF- $\alpha$ ; IA vs 1 HTCL; XRD.  
**1309** // N // ximaonanobatin B // IA vs TNF- $\alpha$ ; IA vs 1 HTCL.  
**1310** // N // ximaonanobatin C // IA vs TNF- $\alpha$ ; IA vs 1 HTCL.  
**1311** // N // ximaonanobatin D // IA vs TNF- $\alpha$ ; IA vs 1 HTCL.  
**1312** // N // ximaonanobatin E // IA vs TNF- $\alpha$ ; IA vs 1 HTCL.  
**1313** // N // ximaonanobatin F // IA vs TNF- $\alpha$ ; IA vs 1 HTCL.  
**1314** // N // ximaonanobatin G // IA vs TNF- $\alpha$ ; IA vs 1 HTCL.  
**1315** // N // ximaonanobatin H // IA vs TNF- $\alpha$ ; IA vs 1 HTCL.  
**1316** // N // ximaonanobatin I // IA vs TNF- $\alpha$ ; IA vs 1 HTCL.
- 515** Cnidaria *Simularia pedunculata* // Ximao Island, Hainan Province, China // New diterpenoids from the South China Sea soft coral *Simularia pedunculata*  
**1317** // N // (1R,3R,6S,14R,E)-6,10,14-trimethyl-3-(prop-1-en-2-yl)-15-oxabicyclo[12.1.0]pentadec-10-en-7-one // IA vs TNF- $\alpha$  release; IA vs PTP1B.  
**1318** // N // (1R,2Z,5E,8S,11E)-1,5,11-trimethyl-8-(prop-1-en-2-yl)cyclotetradeca-2,5,11-trien-1-ol // IA vs TNF- $\alpha$  release; IA vs PTP1B.  
**1319** // N // (1S,2E,5E,7R,10E,14R)-3,7,11,15,15-pentamethylbicyclo[12.1.0]pentadeca-2,5,10-trien-7-ol // IA vs TNF- $\alpha$  release; IA vs PTP1B.
- 516** Cnidaria *Simularia* sp // Odo Coast, Itoman City, Okinawa // Unusual cembrane diterpenoid isolated from the Japanese soft coral genus *Simularia*  
**1320** // N // odosinularol // IA vs 1 TCL.
- 517** Cnidaria *Simularia* sp // Minato-Machi, Japan // Furanocembranoid from the Okinawan soft coral *Simularia* sp.  
**1321** // N // 11-hydroxy- $\Delta$ 12(13)-pukalide // IA vs 1 bact. strain; IA vs brine shrimp.

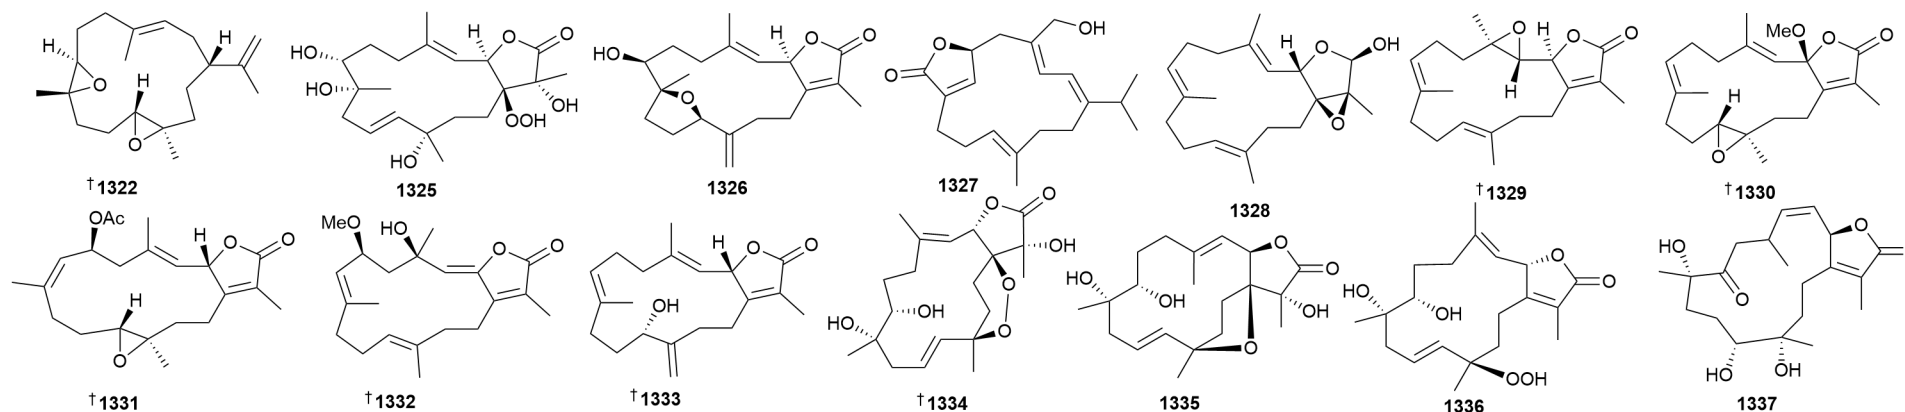

- 518** Cnidaria *Simularia* sp // Turtle Island, Yilan County, Taiwan // (1R,7R,8R,11R,12R)-7,8:11,12-bisepoxycembrene A: a novel cembranoid from octocoral *Simularia* sp.  
**1322** // N // (1R,7R,8R,11R,12R)-7,8:11,12-bisepoxycembrene A // IA vs 2 HTCLs; XRD.
- 519** Cnidaria *Simularia* sp // Turtle Island, Yilan County, Taiwan // Chlorofurancembranoids A and B: novel cembranoids from octocoral *Simularia* sp.  
**1323** // N // chlorofurancembranoid A // IA vs 2 HTCLs; XRD.  
**1324** // N // chlorofurancembranoid B // IA to weak cytotox. vs 2 HTCLs.
- 520** Cnidaria *Sarcophyton convolutum* // Red Sea coast, Hurghada, Egypt. // Sarcoconvolutums F and G: polyoxygenated cembrane-type diterpenoids from *Sarcophyton convolutum*, a Red Sea soft coral  
**1325** // N // sarcoconvolutum F // IA vs 3 HTCLs.  
**1326** // N // sarcoconvolutum G // IA vs 3 HTCLs.
- 521** Cnidaria *Sarcophyton ehrenbergi* // Van Phong Bay, Khanh Hoa province, Vietnam // Cembranoids from the Vietnamese soft coral *Sarcophyton ehrenbergi*  
**1327** // N // ehrenbergol F // IA vs NO prod.  
**1328** // N // ehrenbergol G // IA vs NO prod.
- 522** Cnidaria *Sarcophyton elegans* // Xisha Island (YaGong Island) // Sarcoelegantolides C–G, five new cembranes from the South China Sea soft coral *Sarcophyton elegans*  
**1329** // N // sarcoelegantolide C // IA vs anti-inflam.  
**1330** // N // sarcoelegantolide D // IA vs anti-inflam.  
**1331** // N // sarcoelegantolide E // IA vs anti-inflam.  
**1332** // N // sarcoelegantolide F // IA vs anti-inflam.  
**1333** // N // sarcoelegantolide G // IA vs anti-inflam.
- 523** Cnidaria *Sarcophyton roseum* // Dahab, Egypt // Sarcoroseolides A-D, four undescribed cembranoids from the Red Sea soft coral *Sarcophyton roseum*  
**1334** // N // sarcoroseolide A // NT.  
**1335** // N // sarcoroseolide B // IA vs anti-inflam.  
**1336** // N // sarcoroseolide C // NT.  
**1337** // N // sarcoroseolide D // NT.



## 7 Cnidarians

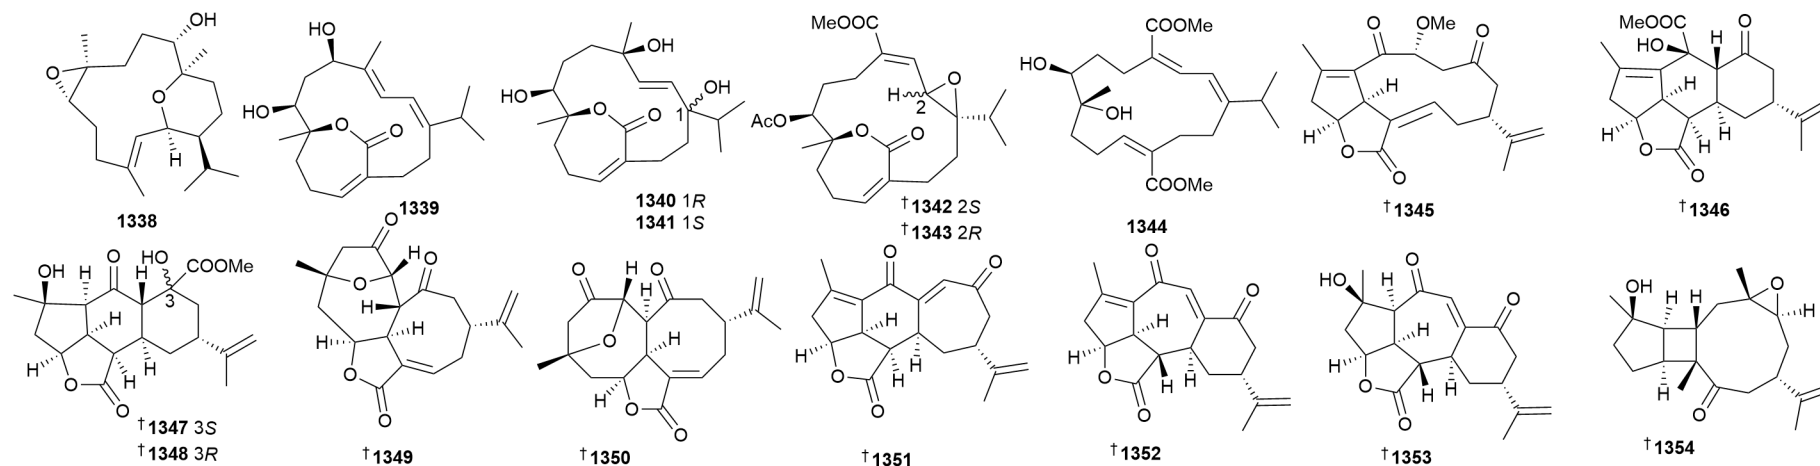

- 524** Cnidaria *Sarcophyton trocheliophorum* // Hurghada province, Egypt // Diterpenes and sterols from the Red Sea soft coral *Sarcophyton trocheliophorum* and their cytotoxicity and anti-leishmanial activities  
**1338** // N // sarcopyranoid A // IA vs 3 HTCLs; IA vs *Leishmania major*.
- 525** Cnidaria *Sarcophyton cinereum* // Xiaoliuqi island, Taiwan // Cembranolides and related constituents from the soft coral *Sarcophyton cinereum*  
**1339** // N // cinerenolide A // NT.  
**1340** // N // cinerenolide B // IA vs 3 TCLs; IA vs 1 nMCL.  
**1341** // N // cinerenolide C // IA vs 3 TCLs; IA vs 1 nMCL.
- 526** Cnidaria *Sarcophyton tortuosum* // Lanyu Island, Taiwan // Computationally assisted structural elucidation of cembranoids from the soft coral *Sarcophyton tortuosum*  
**1342** // N // tortuolide A // IA vs 5 TCLs; IA vs anti-inflam.  
**1343** // N // tortuolide B // IA vs 5 TCLs; IA vs anti-inflam.  
**1344** // N // *epi*-sarcophytonolide Q // IA vs 5 TCLs; IA vs anti-inflam.
- 527** Cnidaria *Simularia densa* // Xisha island // Sinudenoids A–E, C19-norcembranoid diterpenes with unusual scaffolds from the soft coral *Simularia densa*  
**1345** // N // sinudenoid A // IA vs anti-inflam.; XRD.  
**1346** // N // sinudenoid B // IA vs anti-inflam.; XRD.  
**1347** // N // sinudenoid C // IA vs anti-inflam.; XRD.  
**1348** // N // sinudenoid D // IA vs anti-inflam.  
**1349** // N // sinudenoid E // IA vs anti-inflam.; XRD.
- 528** Cnidaria *Simularia scabra* // Xisha Islands, Hainan, China // Sinuscalide A: an antiviral norcembranoid with an 8/8-fused carbon scaffold from the South China Sea soft coral *Simularia scabra*  
**1350** // N // sinuscalide A // weak activ. vs 1 virus strain; weak inhib. osteoclastogenesis; IA vs 2 TCLs; XRD  
**1351** // N // sinuscalide B // weak inhib. osteoclastogenesis; IA vs 2 TCLs; XRD.  
**1352** // N // sinuscalide C // weak inhib. osteoclastogenesis; IA vs 2 TCLs; XRD.  
**1353** // N // sinuscalide D // weak inhib. osteoclastogenesis; IA vs 2 TCLs; XRD.  
**1354** // N // sinuscatone A // weak inhib. osteoclastogenesis; IA vs 2 TCLs; XRD.

**Key:** Main article bibliography reference // Taxonomy // Location // Article title

Compound number // Status // Compound name // Biological activity and Other information

7 Cnidarians

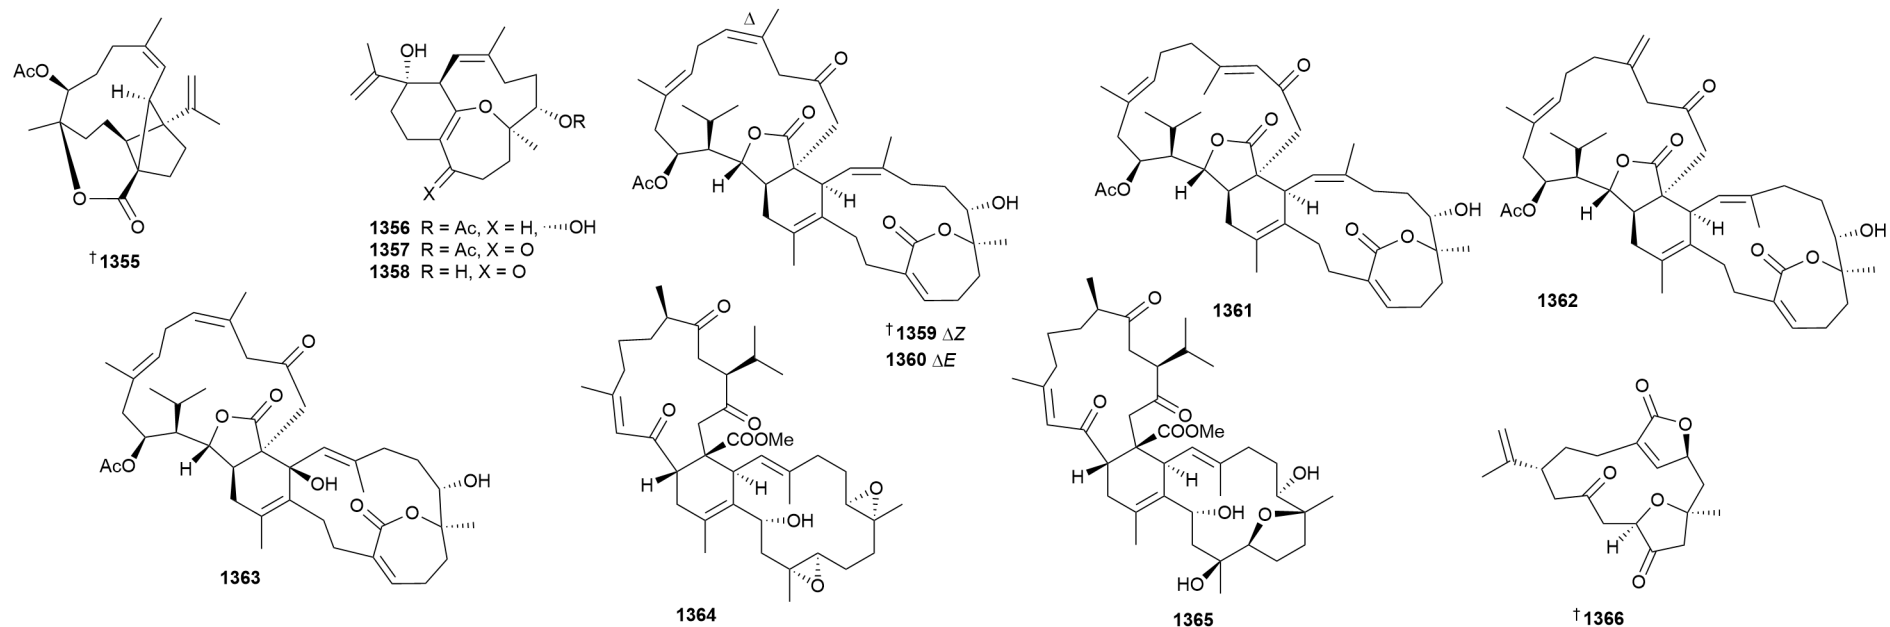

- 529** Cnidaria *Sarcophyton cinereum* // Xiaoliuqi island, Taiwan // An unprecedented cembranoid with a novel tricyclo[9.3.0.02,12]tetradecane skeleton and related diterpenes from the soft coral *Sarcophyton cinereum*  
**1355** // N // cinerelolide // IA vs anti-inflam.  
**1356** // N // 11-deoxo-11 $\alpha$ -hydroxysarsolenone // IA to weak cytotox. vs 2 TCLs; IA vs anti-inflam.  
**1357** // R // sarsolenone // IA vs anti-inflam.; IA vs 2 TCLs.  
**1358** // R // 7-deacetylsarsolenone // IA vs anti-inflam.; IA vs 2 TCLs.
- 530** Cnidaria *Sarcophyton serenei* // Xisha Island, China // Bistochelides H–L: biscembranoids from the South China Sea soft coral *Sarcophyton serenei*  
**1359** // N // bistochelide H // mod. inhib. osteoclastogenesis at 10  $\mu$ M; XRD.  
**1360** // N // bistochelide I // IA vs osteoclastogenesis.  
**1361** // N // bistochelide J // mod. inhib. osteoclastogenesis at 10  $\mu$ M.  
**1362** // N // bistochelide K // IA vs osteoclastogenesis.  
**1363** // N // bistochelide L // IA vs osteoclastogenesis.
- 531** Cnidaria *Sarcophyton trocheliophorum* // Pingtung, Taiwan // MS/MS molecular networking unveils the chemical diversity of biscembranoid derivatives, neutrophilic inflammatory mediators from the cultured soft coral *Sarcophyton trocheliophorum*  
**1364** // N // sarcotrochelide A // IA vs anti-inflam.  
**1365** // N // sarcotrochelide B // IA vs anti-inflam.
- 534** \* // \* // Total synthesis of scabrolide F  
**1366** // R // scabrolide F // Abs. config. by synth.

**Key:** Main article bibliography reference // Taxonomy // Location // Article title

Compound number // Status // Compound name // Biological activity and Other information

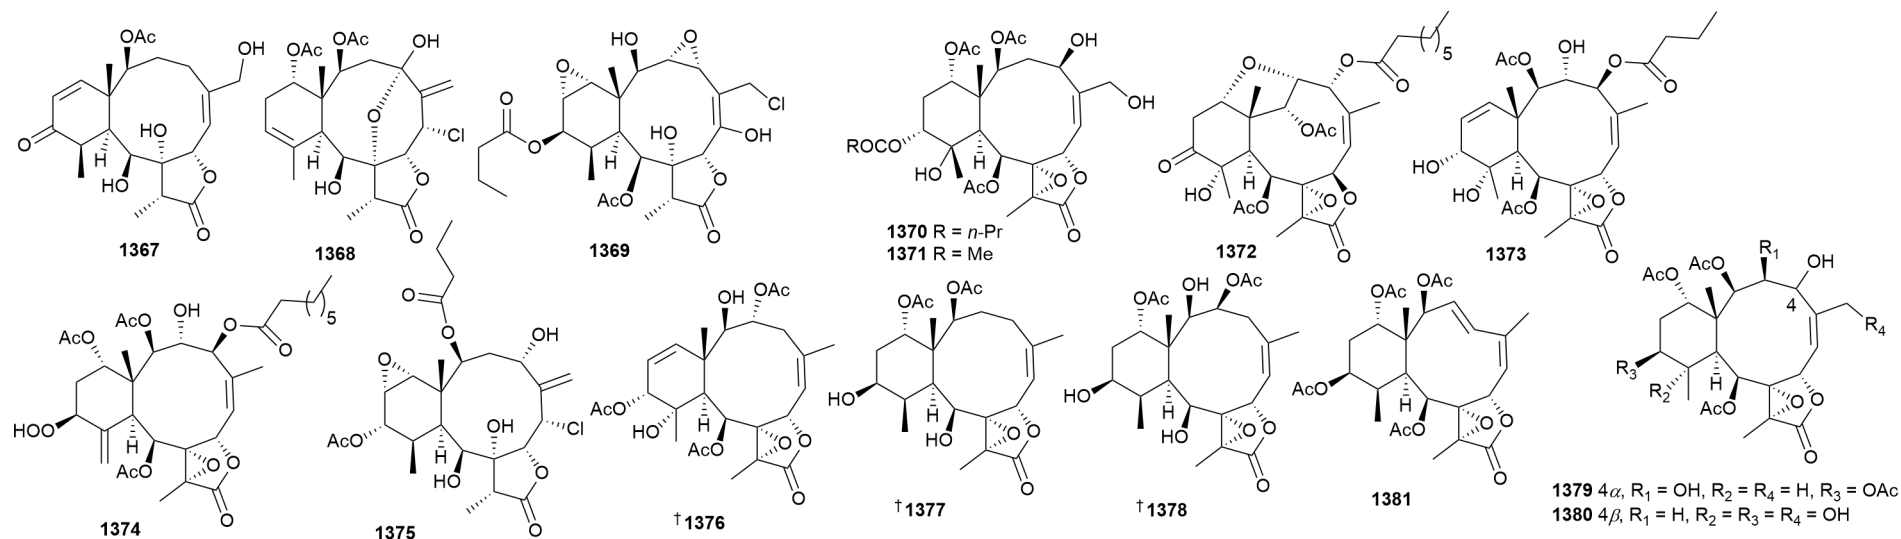

- 540** Cnidaria *Briareum stechei* // // Briarane-type diterpenoids from the cultured octocoral *Briareum stechei* (Kükenthal, 1908)  
**1367** // N // briastecholide D // IA vs anti-inflam.  
**1368** // N // briastecholide E // IA vs anti-inflam.  
**1369** // N // briastecholide F // IA vs anti-inflam.  
**1377** // R // excavatolide E // IA vs anti-inflam.; XRD.
- 541** Cnidaria *Briareum stechei* // Haikou, Pingtung County, Taiwan // New 8,17-epoxybriaranes from octocoral *Briareum stechei* (Kükenthal, 1908)  
**1370** // N // briastecholide K // IA vs 2 HTCLs.  
**1371** // N // briastecholide L // IA vs 2 HTCLs.  
**1378** // R // excavatolide M // IA vs 2 HTCLs; XRD
- 542** Cnidaria *Briareum stechei* // Ie Island, Okinawa, Japan // Briastecholides G–J, new polyoxygenated briaranes from the octocoral *Briareum stechei*  
**1372** // N // briastecholide G // NT.  
**1373** // N // briastecholide H // weak anti-inflam. activ.  
**1374** // N // briastecholide I // NT.  
**1375** // N // briastecholide J // NT.  
**1376** // R // brianodin A // weak anti-inflam. activ.; XRD.
- 543** Cnidaria *Briareum violaceum* // // Briavioids A–C, discovery of new polyacetoxymbriaranes from octocoral *Briareum violaceum* (Quoy & Gaimard, 1833)  
**1379** // N // briavioid A // IA vs anti-inflam.; XRD.  
**1380** // N // briavioid B // IA vs anti-inflam.  
**1381** // N // briavioid C // IA vs anti-inflam.

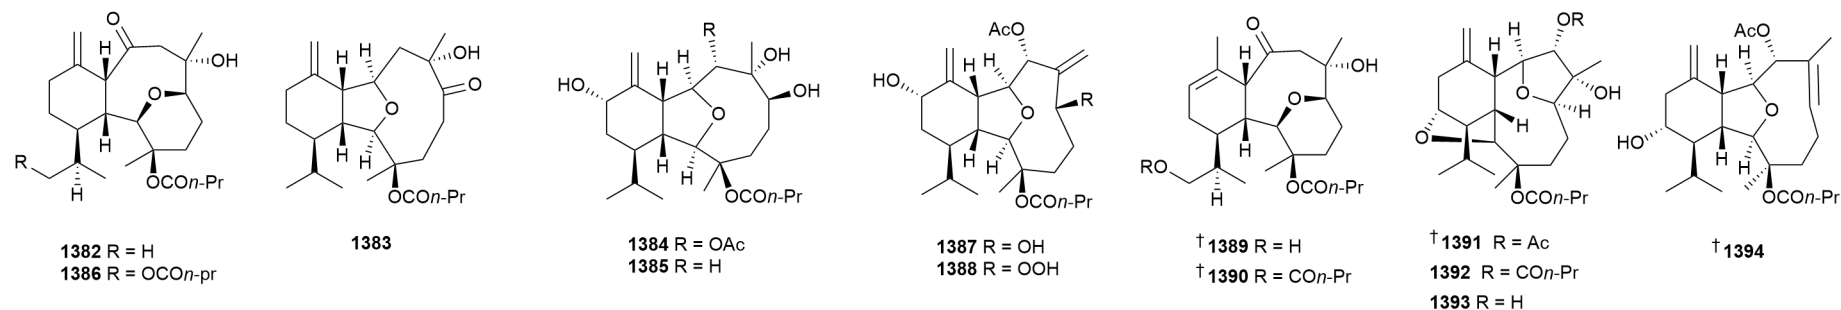

- 545** Cnidaria *Cladiella conifera* // Penghu Archipelago, Taiwan // Coniferains A and B, new unicellin-based diterpenoids from the octocoral *Cladiella conifera* (Tixier-Durivault, 1943)  
**1382** // N // coniferain A // IA vs 2 HTCLs.  
**1383** // N // coniferain B // IA vs 2 HTCLs.  
**1386** // R // australin F // NT.
- 546** Cnidaria *Cladiella conifera* // Penghu Archipelago, Taiwan // Coniferains C and D, new unicellin-based diterpenoids from *Cladiella conifera*  
**1384** // N // coniferain C // IA vs HT-29; promoted cell growth of DLD-1 cells *in vitro*.  
**1385** // N // coniferain D // IA vs HT-29; promoted cell growth of DLD-1 cells *in vitro*.
- 547** Cnidaria *Cladiella krempfi* // Ximao Island, Hainan Province, China // New cladiellin-type diterpenoids from the South China Sea soft coral *Cladiella krempfi*: structures and molecular docking analysis in EGFRs  
**1387** // N // lithophynol C // IA vs A549; IA inhib. EGFR; XRD.  
**1388** // N // lithophynol D // IA vs A549; IA inhib. EGFR; chemical conversion to lithophynol C.
- 548** Cnidaria *Cladiella krempfi* // Ximao Island, Sanya Bay, Hainan province, China // Uncommon unicellin-based diterpenoid and 9, 11-secosteroid from the Sanya soft coral *Cladiella krempfi*: Structure and stereochemistry  
**1389** // N // clakrefielin A // IA vs range of undisclosed bioassays.  
**1390** // R // australin E // XRD.  
**1404** // N // cladiellasterol A // IA vs range of undisclosed bioassays.
- 549** Cnidaria *Simularia ornata* // Ximao Island, Hainan Province, China // Ximaoornatins A–C, polyoxygenated diterpenoids from the Hainan soft coral *Simularia ornata*  
**1391** // N // ximaoornatin A // IA vs anti-inflam.; IA inhib. PTP1B; XRD.  
**1392** // N // ximaoornatin B // IA vs anti-inflam.; IA inhib. PTP1B; XRD.  
**1393** // N // ximaoornatin C // IA vs anti-inflam.; IA inhib. PTP1B; XRD.  
**1394** // N // lithophynin K // IA vs anti-inflam.; IA inhib. PTP1B; XRD.

7 Cnidarians

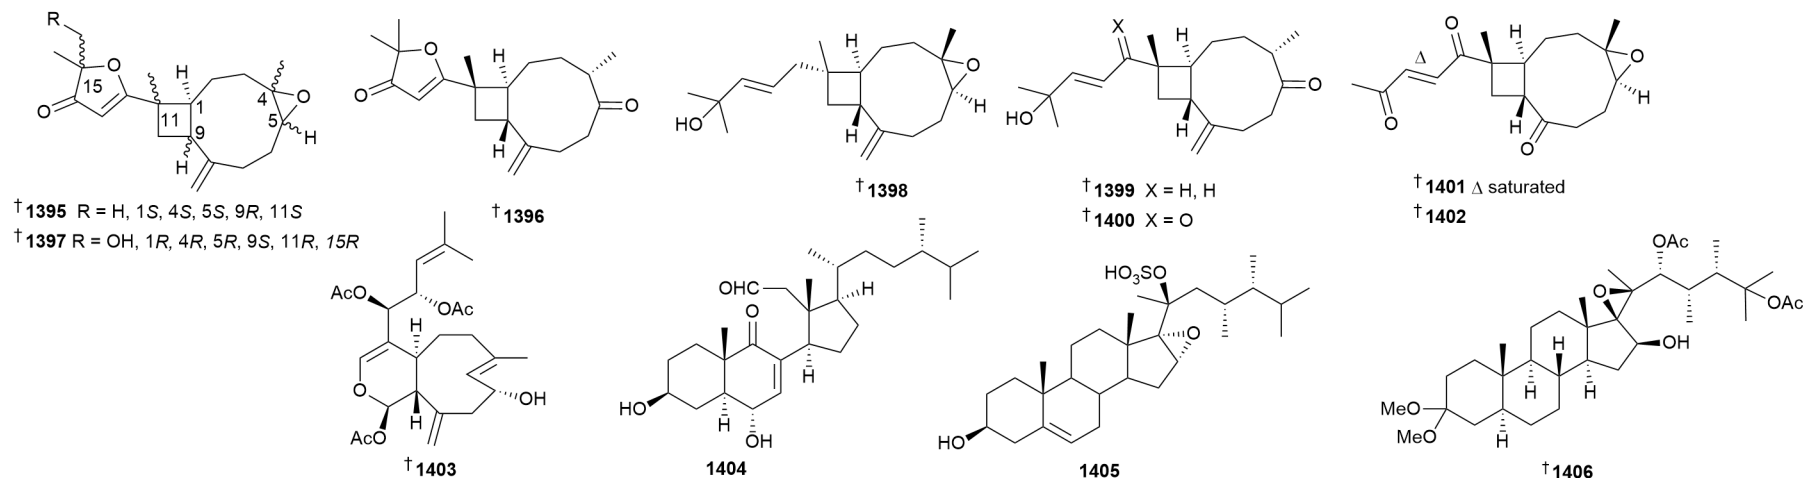

494 Cnidaria *Simularia hirta* // Yalong bay, Sanya, China // Sinuhirtone A, an uncommon 17,19-dinorxeniaphyllanoid, and nine related new terpenoids from the Hainan soft coral *Simularia hirta*

1395 // N // sinuhirfuranone A // NT.

1396 // N // sinuhirfuranone B // IA vs 4 HTCLs.

1397 // N // sinuhirfuranone C // IA vs 4 HTCLs.

1398 // N // sinuhirtin C // IA vs 4 HTCLs.

1399 // N // sinuhirtin D // NT.

1400 // N // sinuhirtin E // NT.

1401 // N // sinuhirtone A // IA vs 4 HTCLs.

1402 // N // sinuhirtone B // IA vs 4 HTCLs.

550 \* // \* // 13-Epi-9-deacetylxenicin derivatives from a Taiwanese soft coral *Asterospicularia laurae* and their cytotoxic activity

1403 // R // 13-epi-9-deacetylxenicin // IA to weak cytotox. vs 4 HTCLs.

553 Cnidaria *Simularia variabilis* // Larak, the Persian Gulf, Iran // Novel 16,17-epoxy-23-methylergostane derivative from *Simularia variabilis*, a soft coral from the Persian Gulf, with apoptotic activities against breast cancer cell lines

1405 // N // 16 $\alpha$ ,17 $\alpha$ -epoxy-sinusta-5-en-3 $\beta$ -ol-20 $\beta$ -yl sulfate // IA vs 2 HTCLs.

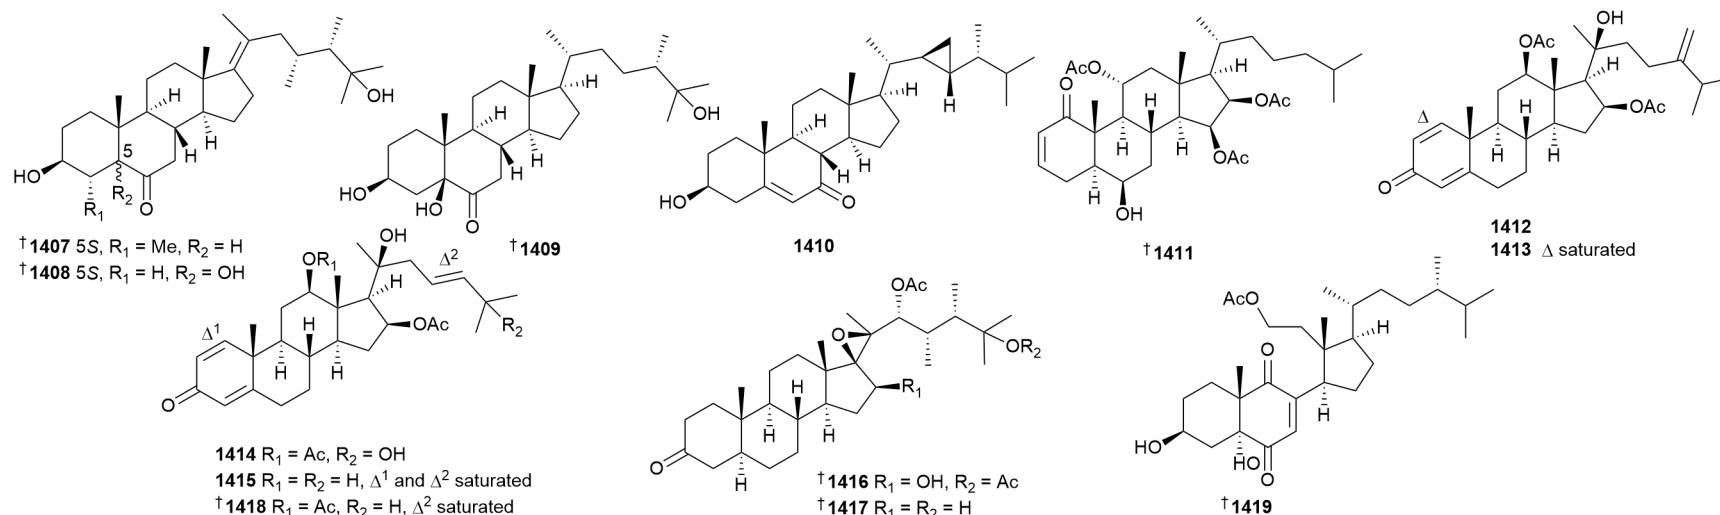

- 554** Cnidaria *Isis hippuris* // Orchid Island (Lanyu) // 17,20-Epoxysteroids from octocoral *Isis hippuris* (Linnaeus, 1758)  
**1406** // N // hippuristeroketal B // IA vs 2 HTCLs; XRD  
**1416** // R // hippuristerone A // XRD.  
**1417** // R // hippuristerone I // XRD.
- 555** Cnidaria *Lobophytum pauciflorum* // Yongle Islands, Xisha Islands, Hainan, China // Four bioactive new steroids from the soft coral *Lobophytum pauciflorum* collected in South China Sea  
**1407** // N // lobophysterol E // IA vs 3 HTCLs; IA vs anti-inflam.; XRD.  
**1408** // N // lobophysterol F // IA vs 3 HTCLs; IA vs anti-inflam.; XRD.  
**1409** // N // lobophysterol G // IA vs 3 HTCLs; IA vs anti-inflam.; XRD.  
**1410** // N // lobophysterol H // IA vs 3 HTCLs; IA vs anti-inflam.
- 491** Cnidaria *Alcyonium* sp // Antarctica // Chemistry and bioactivity of the deep-water Antarctic octocoral *Alcyonium* sp.  
**1411** // N // alcyosterone // weak activ. vs *L. donovani*; XRD.
- 556** Cnidaria *Dendronephthya* sp // Yushan Islands, Zhejiang province, Eastern China // Dendronecholones A-D, new anti-*Vibrio* steroids isolated from East China Sea *Dendronephthya* soft coral  
**1412** // N // dendronecholone A // IA vs 3 *Vibrio* sp.  
**1413** // N // dendronecholone B // IA to weak vs 3 *Vibrio* sp.  
**1414** // N // dendronecholone C // IA to weak vs 3 *Vibrio* sp.  
**1415** // N // dendronecholone D // IA vs 3 *Vibrio* sp.  
**1418** // R // nanjiol A // Weak vs 3 *Vibrio* sp; XRD.
- 455** \* // \* // Synthesis of 9,11-secosteroids pinnisterol E, glaciasterol B, and 6-keto-aplidiasterol B  
**1419** // R // pinnisterol E // Abs. config. by synth.; XRD.

8 Bryozoans

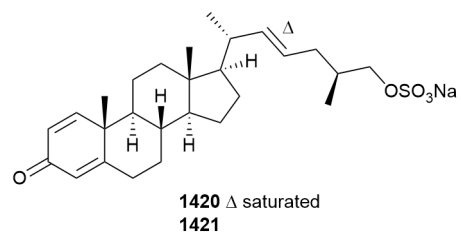

- 560 Bryozoa *Calypthotheca* sp // Seragaki, Okinawa, Japan // Two new steroid sulfates from a cheilostome bryozoan, *Calypthotheca* sp.  
1420 // N //  $C_{27}H_{41}NaO_5S$  // IA vs 1 HTCL.  
1421 // N //  $C_{27}H_{39}NaO_5S$  // IA vs 1 HTCL.

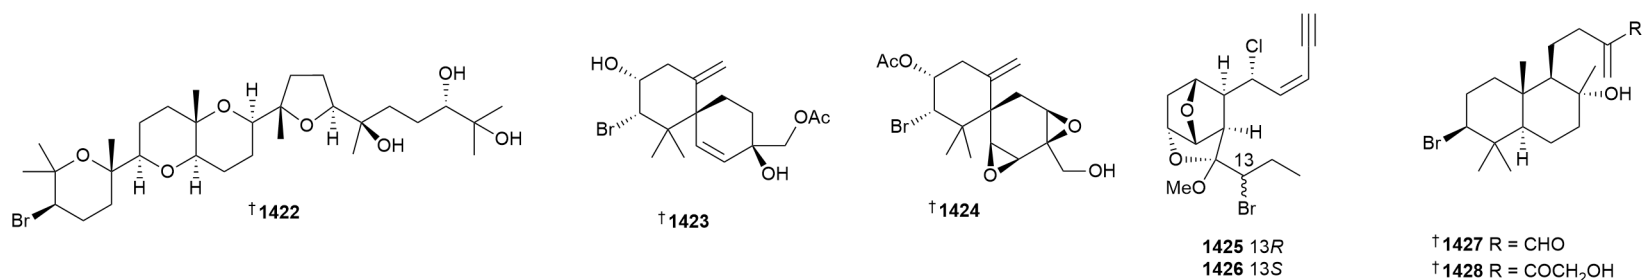

- 359** \* // \* // Asymmetric total syntheses, stereostructures, and cytotoxicities of marine bromotriterpenoids aplysiol B (laurenmariannol) and saiyacenol A  
**1422** // R // aplysiol B, laurenmariannol // pot. cytotox. vs 1 murine CL; IA vs 2 HTCL; revised by total synth.; AC assigned;
- 564** Mollusca *Aplysia dactylomela* // Nhat Le, Quang Binh province, Vietnam // Structure elucidation of new brominated sesquiterpenes from the sea hare *Aplysia dactylomela* by experimental and DFT computational methods  
**1423** // N // dactylomelanin A // IA vs 3 HTCLs.  
**1424** // N // dactylomelanin B // IA vs 3 HTCLs.
- 565** Mollusca *Aplysia dactylomela* // Awase, Okinawa, Japan // New halogenated C<sub>15</sub> acetogenins from Okinawan sea hare *Aplysia dactylomela*  
**1425** // N // (Z)-5-(1-bromopropyl)-7-(1-chloropent-2-en-4-yn-1-yl)-5-methoxyhexahydro-2,6-methanofuro [3,2-b]furan // IA vs 1 HTCL.  
**1426** // N // (Z)-5-(1-bromopropyl)-7-(1-chloropent-2-en-4-yn-1-yl)-5-methoxyhexahydro-2,6-methanofuro [3,2-b]furan // IA vs 1 HTCL.
- 566** Mollusca *Aplysia kurodai* // Shima peninsula, Mie Prefecture, Japan // Isolation and synthesis of azuriaplysins A and B, bromoditerpenes with an  $\alpha$ -methylene carbonyl from the sea hare *Aplysia kurodai*  
**1427** // N // azuriaplysins A // weak cytotox. vs 1 HTCL; abs. config. by synth.  
**1428** // N // azuriaplysins B // IA vs 1 HTCL; abs. config. by synth.



9 Molluscs

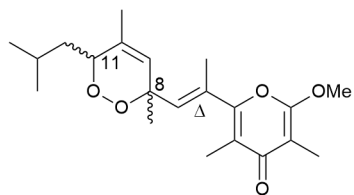

1429 8R, 11R, ΔE  
1430 8S, 11S, ΔE  
1431 8R, 11R, ΔZ  
1432 8S, 11S, ΔZ

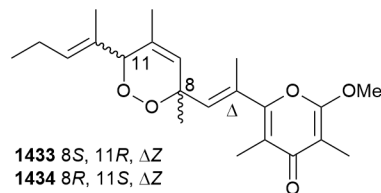

1433 8S, 11R, ΔZ  
1434 8R, 11S, ΔZ  
1435 8R, 11R, ΔZ  
1436 8S, 11S, ΔZ  
1437 8S, 11R, ΔE  
1438 8R, 11S, ΔE  
1439 8R, 11R, ΔE  
1440 8S, 11S, ΔE

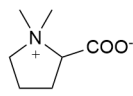

1441

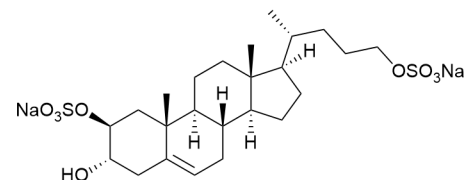

1442

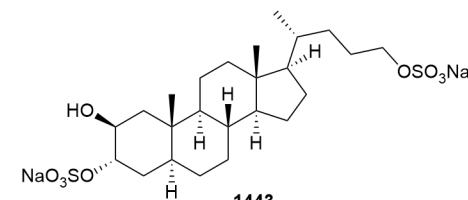

1443

- 567 Mollusca *Placobranchus ocellatus* // Ximao Island, Hainan Province, China // Ocellatuperoxides A–F, uncommon anti-tumoral γ-pyrone peroxides from a photosynthetic mollusk *Placobranchus ocellatus*  
1429 // N // (+)-ocellatuperoxide A // NT; XRD of rac.  
1430 // N // (–)-ocellatuperoxide A // NT; XRD of rac.  
1431 // N // (+)-ocellatuperoxide B // NT.  
1432 // N // (–)-ocellatuperoxide B // NT.  
1433 // N // (+)-ocellatuperoxide C // weak cytotox. vs 1 HTCL.  
1434 // N // (–)-ocellatuperoxide C // IA vs 1 HTCL.  
1435 // N // (+)-ocellatuperoxide D // IA vs 3 HTCLs; rac.  
1436 // N // (–)-ocellatuperoxide D // IA vs 3 HTCLs; rac.  
1437 // N // (+)-ocellatuperoxide E // IA vs 3 HTCLs; rac.  
1438 // N // (–)-ocellatuperoxide E // IA vs 3 HTCLs; rac.  
1439 // N // (+)-ocellatuperoxide F // IA vs 3 HTCLs; rac.  
1440 // N // (–)-ocellatuperoxide F // IA vs 3 HTCLs; rac.
- 568 Mollusca *Elysia crispata* // Morrocoy National Park, Falcon State, Venezuela // Reassignment of crispatene, isolation and chemical characterization of stachydrine, isolated from the marine mollusk *Elysia crispata*  
1441 // M // stachydrine // NT.
- 569 Mollusca *Lambis lambis* // Truong Sa archipelago, Vietnam // Two new sterol sulfates from marine spider conch *Lambis lambis* Linnaeus, 1758  
1442 // N // 25,26,27-tri-nor-cholest-5-ene-2β,3α,24-triol-2,24-disulfate // NT.  
1443 // N // 25,26,27-tri-nor-cholesta-2β,3α,24-triol-3,24-disulfate // NT.

10 Tunicates (ascidians)

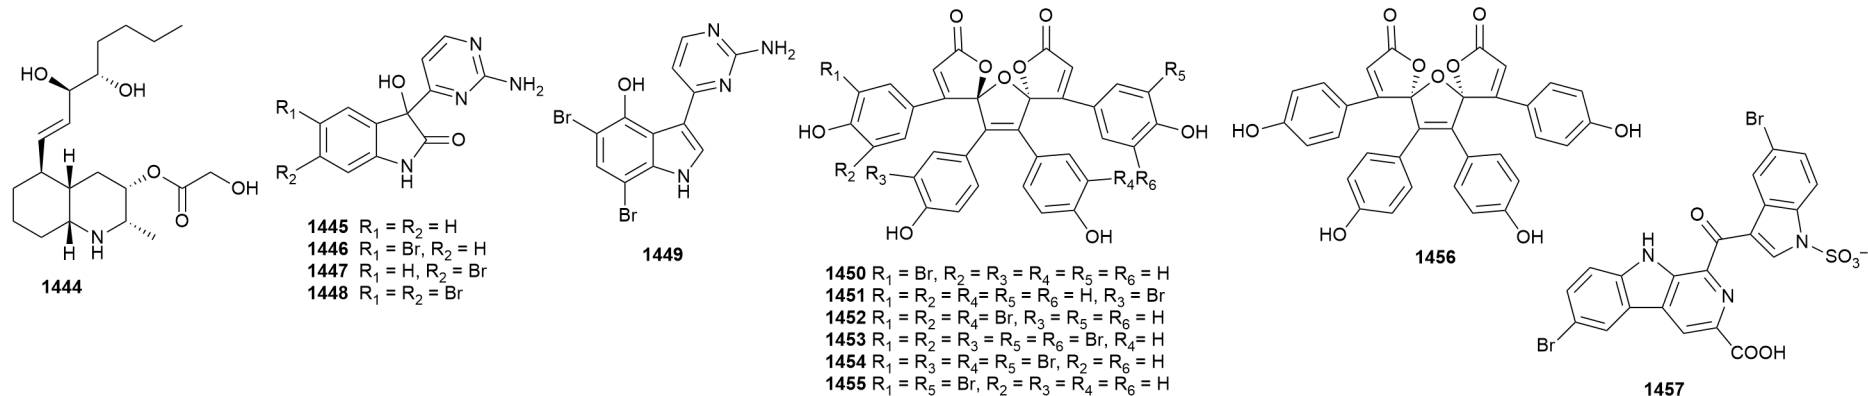

- 585** Chordata *Clavelina lepadiformis* // Pozzuoli, Napoli, Italy // Insights into cytotoxic behavior of lepadins and structure elucidation of the new alkaloid lepadin L from the Mediterranean ascidian *Clavelina lepadiformis*  
**1444** // N // lepadin L // IA vs 5 TCLs.
- 586** Chordata *Synoicum* sp // Shag Rocks and South Georgia, Antarctica // Australindolones, new aminopyrimidine substituted indolone alkaloids from an Antarctic tunicate *Synoicum* sp.  
**1445** // N // australindolone A // weak activ. in zebrafish embryo development assay.  
**1446** // N // australindolone B // weak activ. in zebrafish embryo development assay; XRD.  
**1447** // N // australindolone C // weak activ. in zebrafish embryo development assay.  
**1448** // N // australindolone D // weak activ. in zebrafish embryo development assay.  
**1449** // N // meridianin H // Active in zebrafish embryo development assay.
- 587** Chordata *Synoicum prunum* // Boat Rock, North Stradbroke Island, Queensland, Australia //  $\alpha$ -Synuclein aggregation inhibitory prunolides and a dibrominated  $\beta$ -carboline sulfamate from the ascidian *Synoicum prunum*  
**1450** // N // prunolide D //  $\alpha$ -synuclein aggregating properties; IA vs MRSA and MSSA; rac.  
**1451** // N // prunolide E //  $\alpha$ -synuclein aggregating properties; IA vs MRSA and MSSA; rac.  
**1452** // N // prunolide F // IA vs MRSA and MSSA; rac.;  
**1453** // N // prunolide G // IA vs MRSA and MSSA; rac.;  
**1454** // N // prunolide H // NT; rac.;  
**1455** // N // prunolide I // NT; unstable; rac..  
**1456** // N // *cis*-prunolide C //  $\alpha$ -synuclein aggregating properties; IA vs MRSA and MSSA; rac.;  
**1457** // N // pityriacitrin C // IA vs *P. falciparum*; IA vs HEK293 cells.

10 Tunicates (ascidians)

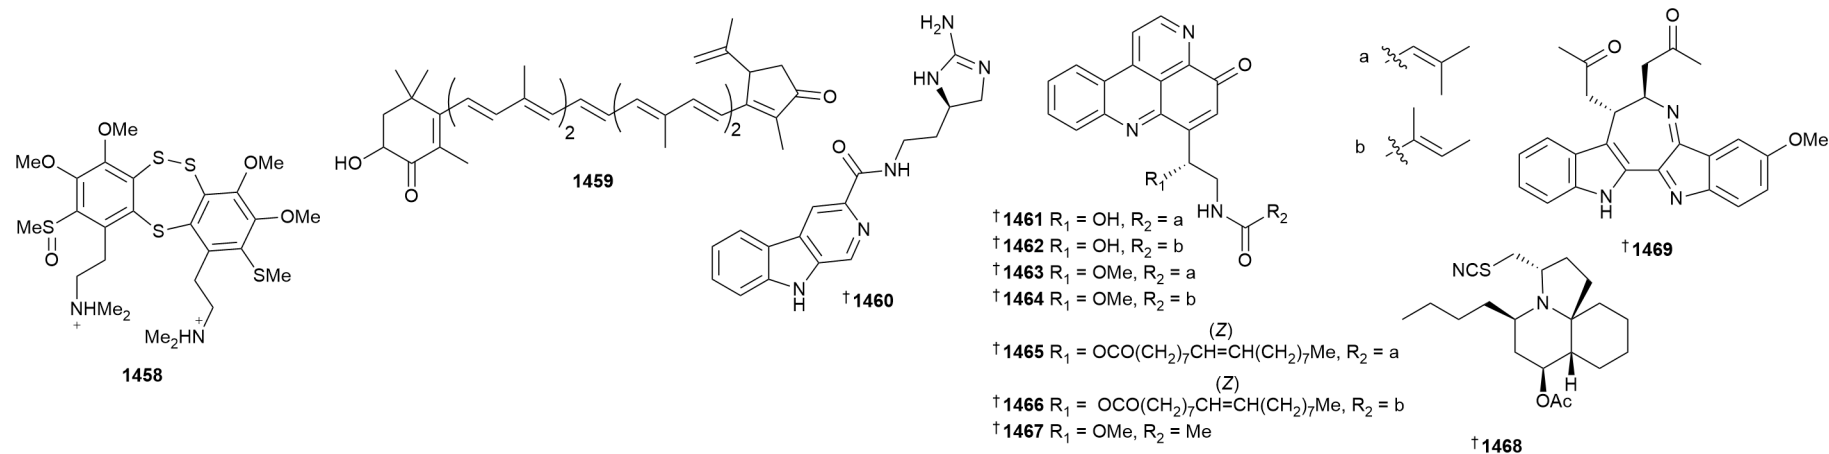

- 384** Chordata *Lissoclinum* sp, Porifera *Callyspongia samarensis* // Siquijor, south western Phillipines // Screening of diverse marine invertebrate extracts identified lissoclinotoxin F, discodermin B, and other anti-*Mycobacterium tuberculosis* active compounds  
**1458** // N // lissoclinotoxin F sulfoxide // weak activ. vs 2 bact. strains; weak cytotox. vs 1 nMCL.
- 588** Chordata *Halocynthia roretzi* // // A novel carotenoid with a unique 2,6-cyclo-ψ-end group, roretziaxanthin, from the sea squirt *Halocynthia roretzi*  
**1459** // N // roretziaxanthin // NT.
- 589** Chordata *Synoicum macroglossum* // // Synthesis of (+)-(R)-tiruchanduramine  
**1460** // R // (+)-(R)-tiruchanduramine // Abs. config. by synth.
- 590** \* // \* // Total synthesis of marine alkaloids cystodytins A-K  
**1461** // R // cystodytin D // Abs. config. by synth.  
**1462** // R // cystodytin E // Abs. config. by synth.  
**1463** // R // cystodytin F // Abs. config. by synth.  
**1464** // R // cystodytin G // Abs. config. by synth.  
**1465** // R // cystodytin H // Abs. config. by synth.  
**1466** // R // cystodytin I // Abs. config. by synth.  
**1467** // R // cystodytin K // Abs. config. by synth.
- 591** \* // \* // Total synthesis of (-)-cylindricine H  
**1468** // R // (-)-cylindricine H // Abs. config. by synth.
- 592** \* // \* // Asymmetric total synthesis of iheyamine B  
**1469** // R // iheyamine B // Abs. config. by synth.

11 Echinoderms

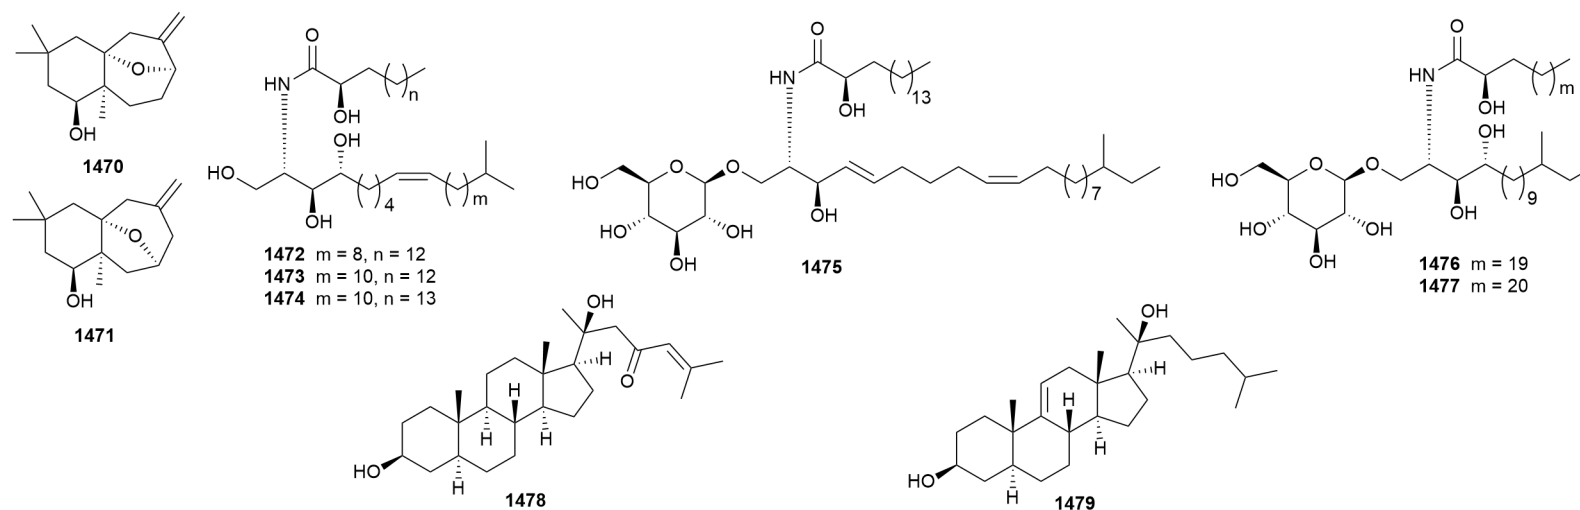

- 599** Echinodermata *Ophiocoma dentata* // Hurghada, Egypt // Cytotoxic and antimicrobial activities of two new sesquiterpenoids from red sea brittle star *Ophiocoma dentata*  
**1470** // N // O8-ophiocomane // IA vs 1 HTCL; IA vs 6 bact. strains; IA vs 1 fungal strain.  
**1471** // N // O7-ophiocomane // IA vs 1 HTCL; IA vs 6 bact. strains; IA vs 1 fungal strain.
- 600** Echinodermata *Ceramaster patagonicus* // Iturup Island, Kuril Islands // New ceramides and cerebrosides from the deep-sea Far Eastern starfish *Ceramaster patagonicus*  
**1472** // N // (2S,3S,4R,9Z)-2-[(2R)-2-hydroxyhexadecanoylamino]-19-methyl-9-icosen-1,3,4-triol // IA vs 4 HTCLs; IA vs 1 HTCL colony formn.  
**1473** // N // (2S,3S,4R,9Z)-2-[(2R)-2-hydroxyhexadecanoylamino]-21-methyl-9-docosen-1,3,4-triol // IA vs 4 HTCLs; IA vs 1 HTCL colony formn.  
**1474** // N // (2S,3S,4R,9Z)-2-[(2R)-2-hydroxyheptadecanoylamino]-21-methyl-9-docosen-1,3,4-triol // IA vs 4 HTCLs; IA vs 1 HTCL colony formn.  
**1475** // N // (2S,3R,4E,9Z)-1-O-(β-D-glucopyranosyl)-2-[(2R)-2-hydroxyheptadecanoylamino]-19-methyl-4,9-henicoadien-3-ol // NT.  
**1476** // N // (2S,3S,4R)-1-O-(β-D-glucopyranosyl)-2-[(2R)-2-hydroxytricosanoylamino]-14-methylhexadecan-3,4-diol // NT.  
**1477** // N // (2S,3S,4R)-1-O-(β-D-glucopyranosyl)-2-[(2R)-2-hydroxytetracosanoylamino]-14-methylhexadecan-3,4-diol // IA vs 4 HTCLs; IA vs 1 HTCL colony formn.
- 601** Echinodermata *Acanthaster planci* // Hurghada, Egypt // First report of steroid derivatives isolated from starfish *Acanthaster planci* with anti-bacterial, anti-cancer and anti-diabetic activities  
**1478** // N // 5α-cholesta-24-en-3β,20β-diol-23-one // Active vs *P. aeruginosa* at unspec. loading; IA vs 4 bact. strains; IA vs 1 fungal strain; IA vs 1 HTCL; IA vs α-glucosidase.  
**1479** // N // 5α-cholesta-9(11)-en-3β,20β-diol // IA vs 5 bact. strains; IA vs 1 fungal strain; IA vs 1 HTCL; IA vs α-glucosidase.

## 11 Echinoderms

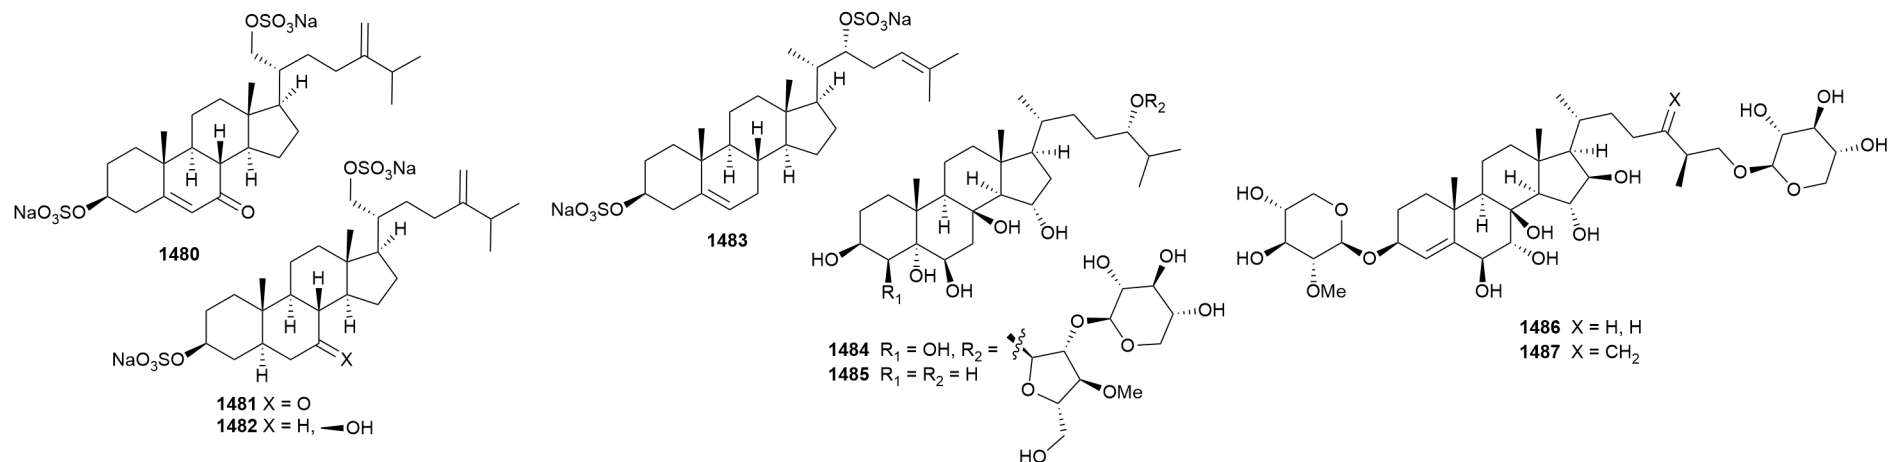

- 602** Echinodermata *Pteraster marsippus* // Urup Island, Sea of Okhotsk // Disulfated ophiuroid type steroids from the far eastern starfish *Pteraster marsippus* and their cytotoxic activity on the models of 2D and 3D cultures  
**1480** // N // (20*R*)-7-oxo-24-methylcholesta-5,24(28)-diene-3 $\beta$ ,21-diyl disulfate disodium salt // IA vs 4 HTCLs; mixture with co-metabolite.  
**1481** // N // (20*R*)-7-oxo-24-methyl-5 $\alpha$ -cholest-24(28)-ene-3 $\beta$ ,21-diyl disulfate disodium salt // IA vs 4 HTCLs; mixture with co-metabolite.  
**1482** // N // (20*R*)-24-methyl-7 $\beta$ -hydroxy-5 $\alpha$ -cholest-24(28)-ene-3 $\beta$ ,21-diyl disulfate disodium salt // IA vs 4 HTCLs.  
**1483** // N // (20*S*)-cholesta-5,24-diene-3 $\beta$ ,22-diyl disulfate disodium salt // IA vs 4 HTCLs.
- 603** Echinodermata *Pentaceraster regulus* // Con Co Islands, Quang Tri, Vietnam // Polyhydroxylated steroid derivatives from the starfish *Pentaceraster regulus*  
**1484** // N // regulusoside D // weak inhib. NO prod.  
**1485** // N // (24*S*)-cholestane-3 $\beta$ ,5,6 $\beta$ ,8,15 $\alpha$ ,24-hexol // weak inhib. NO prod.
- 604** Echinodermata *Culcita novaeguineae* // Xisha Islands, Sansha, Hainan Province, China // Two new polyhydroxylated steroidal glycosides from the starfish *Culcita novaeguineae*  
**1486** // N // (25*S*)-3-*O*-(2-*O*-methyl- $\beta$ -D-xylopyranosyl)-26-*O*-( $\beta$ -D-xylopyranosyl)-cholest-4-ene-3 $\beta$ ,6 $\beta$ ,7 $\alpha$ ,8,15 $\alpha$ ,16 $\beta$ ,26-heptaol // IA vs 3 HTCLs.  
**1487** // N // (25*S*)-3-*O*-(2-*O*-methyl- $\beta$ -D-xylopyranosyl)-26-*O*-( $\beta$ -D-xylopyranosyl)-cholest-4,24(28)-diene-3 $\beta$ ,6 $\beta$ ,7 $\alpha$ ,8,15 $\alpha$ ,16 $\beta$ ,26-heptaol // IA vs 3 HTCLs.

11 Echinoderms

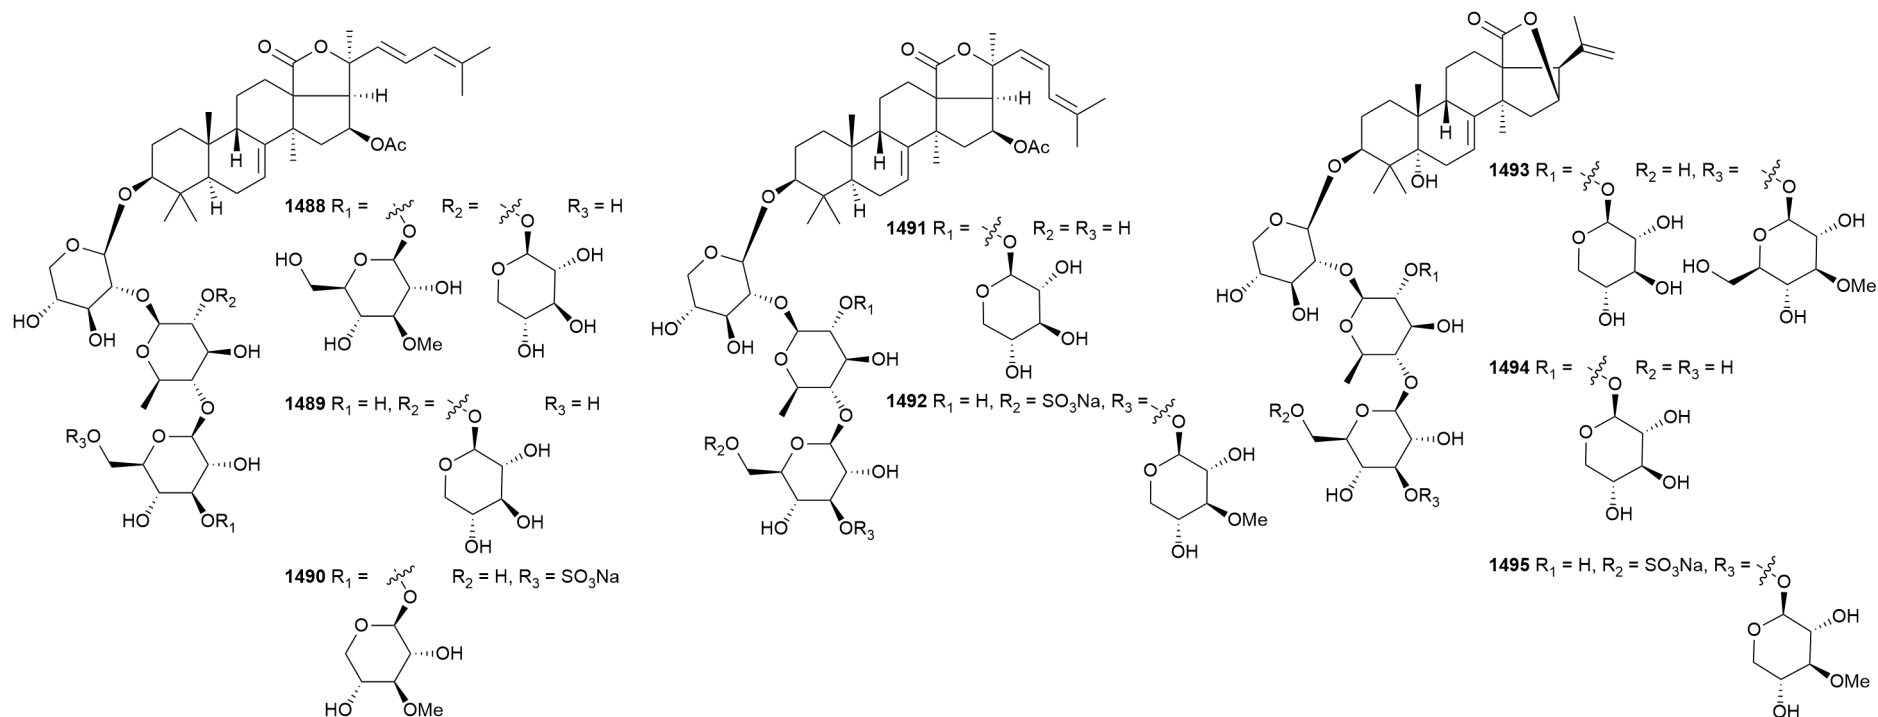

- 605 Echinodermata *Solaster pacificus* // Iturup Island, Japan // In vitro anticancer and cancer-preventive activity of new triterpene glycosides from the Far Eastern starfish *Solaster pacificus*
- 1488 // N // pacificusoside D // IA to mod. cytotox. vs 1 nMCL and 3 HTCL; weak hemolytic; pot. inhib. neoplastic transformation.
- 1489 // N // pacificusoside E // IA vs 1 nMCL and 3 HTCLs; weak hemolytic; IA inhib. neoplastic transformation.
- 1490 // N // pacificusoside F // IA to mod. cytotox. vs 1 nMCL and 3 HTCL; mod. hemolytic; IA inhib. neoplastic transformation.
- 1491 // N // pacificusoside G // IA to weak cytotox. vs 1 nMCL and 3 HTCL; weak hemolytic; IA inhib. neoplastic transformation.
- 1492 // N // pacificusoside H // IA to mod. cytotox. vs 1 nMCL and 3 HTCL; weak hemolytic; IA to weak inhib. neoplastic transformation.
- 1493 // N // pacificusoside I // IA to weak cytotox. vs 1 nMCL and 3 HTCL; weak hemolytic; IA inhib. neoplastic transformation.
- 1494 // N // pacificusoside J // IA vs 1 nMCL and 3 HTCLs; weak hemolytic; IA inhib. neoplastic transformation.
- 1495 // N // pacificusoside K // IA to weak cytotox. vs 1 nMCL and 3 HTCL; weak hemolytic; IA inhib. neoplastic transformation.

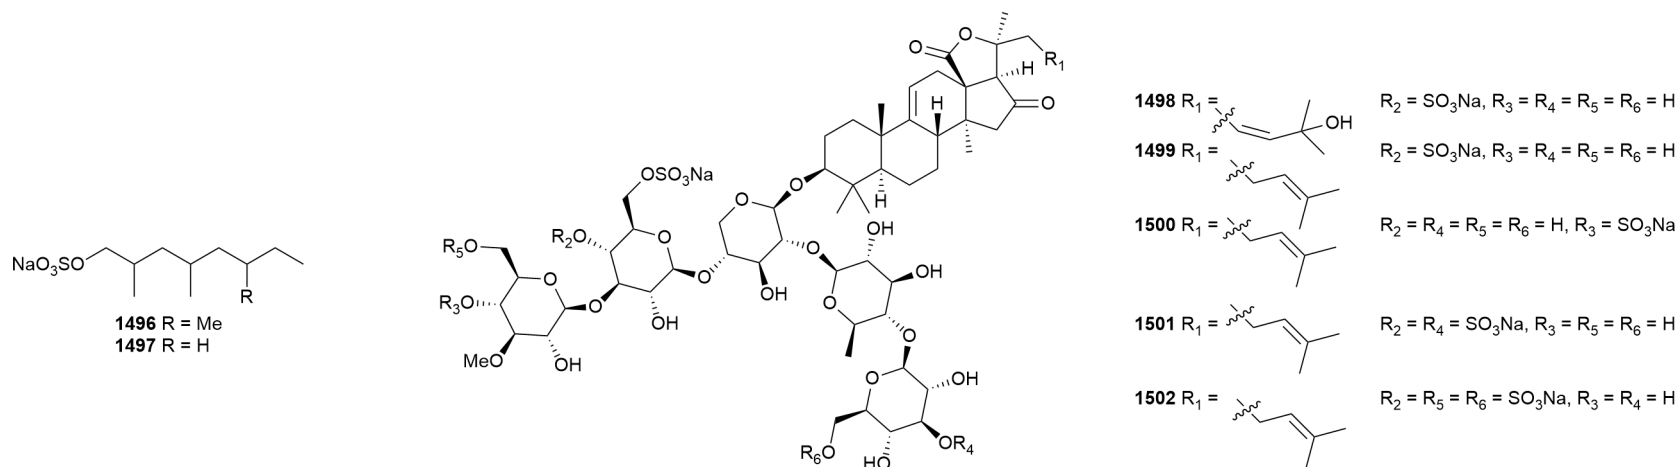

- 606** Echinodermata *Stichopus herrmanni* // Bai Giau island // Herrmananes A and B, two new sulfated hydrocarbons from the sea cucumber *Stichopus herrmanni*  
**1496** // N // herrmanane A // IA vs 5 HTCLs.  
**1497** // N // herrmanane B // IA vs 5 HTCLs.
- 607** Echinodermata *Paracaudina chilensis* // Troitsa bay, Japan // The isolation, structure elucidation and bioactivity study of chilensosides A, A<sub>1</sub>, B, C, and D, holostane triterpene di-, tri- and tetrasulfated pentaosides from the sea cucumber *Paracaudina chilensis* (Caudinidae, Molpadida)  
**1498** // N // chilensoside A // IA vs 5 HTCLs; weak hemolytic.  
**1499** // N // chilensoside A<sub>1</sub> // IA vs 5 HTCLs; weak hemolytic.  
**1500** // N // chilensoside B // IA to weak cytotox. vs 5 HTCL; mod. hemolytic.  
**1501** // N // chilensoside C // IA vs 5 HTCLs; weak hemolytic.  
**1502** // N // chilensoside D // IA vs 5 HTCLs; IA hemolytic.

## 11 Echinoderms

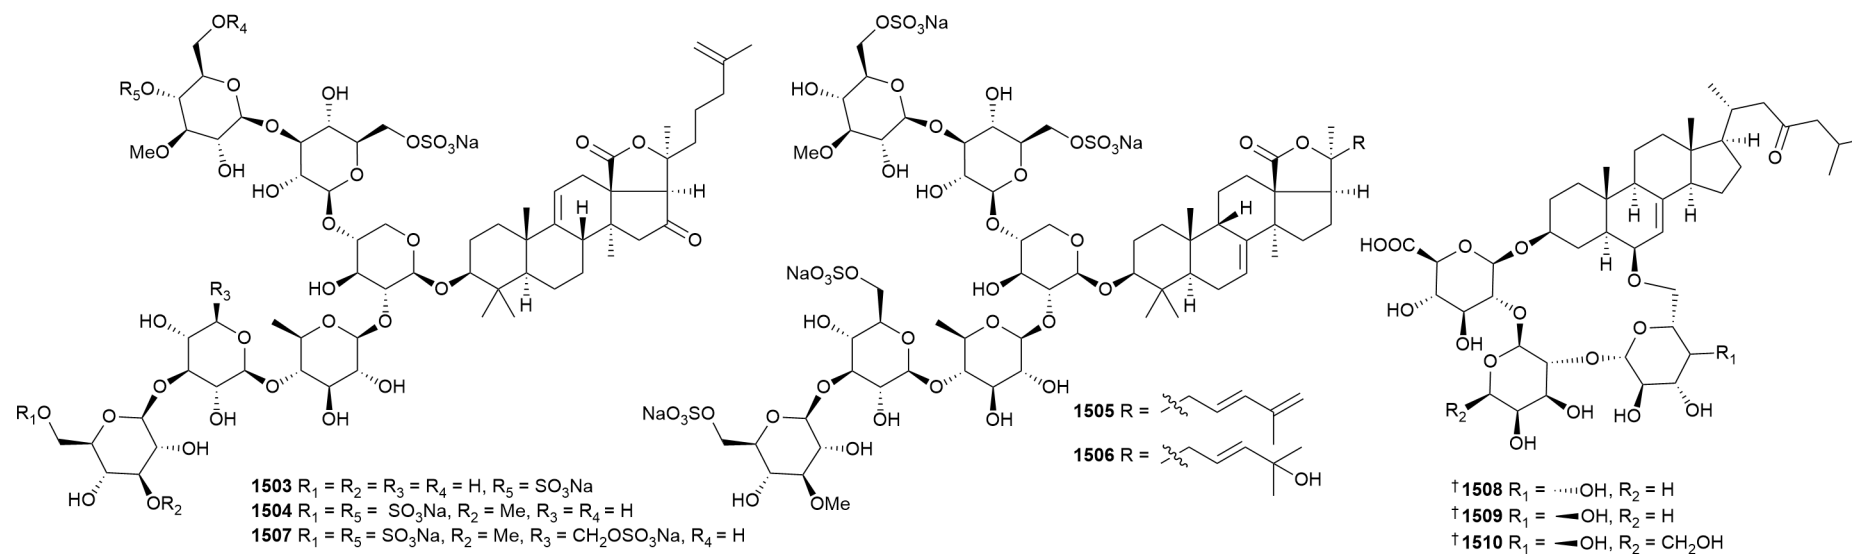

- 608** Echinodermata *Psolus chitonoides* // Bering Island, Russia // Structures and biologic activity of chitonoidosides I, J, K, K<sub>1</sub> and L-triterpene di-, tri- and tetrasulfated hexaosides from the sea cucumber *Psolus chitonoides*  
**1503** // N // chitonoidoside I // IA vs 3 HTCLs; weak hemolytic.  
**1504** // N // chitonoidoside J // IA vs 3 HTCLs; weak hemolytic.  
**1505** // N // chitonoidoside K // IA to weak cytotox. vs 3 HTCLs, mod. hemolytic.  
**1506** // N // chitonoidoside K<sub>1</sub> // IA vs 3 HTCLs; IA hemolytic.  
**1507** // N // chitonoidoside L // IA to weak cytotox. vs 3 HTCLs, mod. hemolytic.
- 610** \* // \* // Total synthesis of starfish cyclic steroid glycosides  
**1508** // R // luzonicoside A // Abs. config. by synth.  
**1509** // R // luzonicoside D // Abs. config. by synth.  
**1510** // R // sepositoside A // Abs. config. by synth.

Key: Main article bibliography reference // Taxonomy // Location // Article title

Compound number // Status // Compound name // Biological activity and Other information



12 Miscellaneous

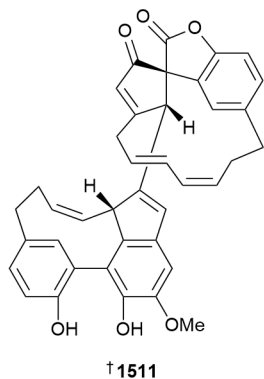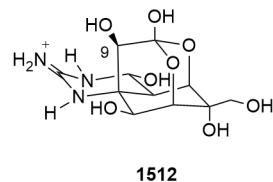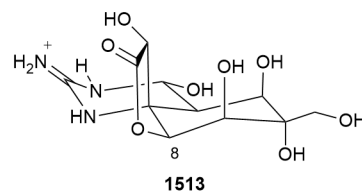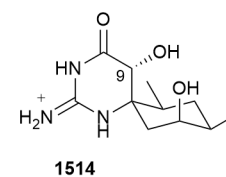

- 625** Tracheophyta *Zostera marina* // Olympiazentrum Schilksee, Kiel, Schleswig-Holstein, Germany // A cytotoxic heterodimeric cyclic diarylheptanoid with a rearranged benzene ring from the seagrass *Zostera marina*  
**1511** // N // zosterabisphenone C // weak cytotox. vs 1 HTCL.
- 626** Chordata *Takifugu flavipaterus*, Chordata *Dichotomycetere ocellatus* // Shimonoseki, Japan // Isolation and biological activity of 9-epitetrodotoxin and isolation of Tb-242B, possible biosynthetic shunt products of tetrodotoxin from pufferfish  
**1512** // N // 9-*epi*-tetrodotoxin-hemilactal // IA by mouse i.p. injection.  
**1513** // N // 9-*epi*-tetrodotoxin-10,8-lactone // IA by mouse i.p. injection.  
**1514** // N // Tb-242B // NT.

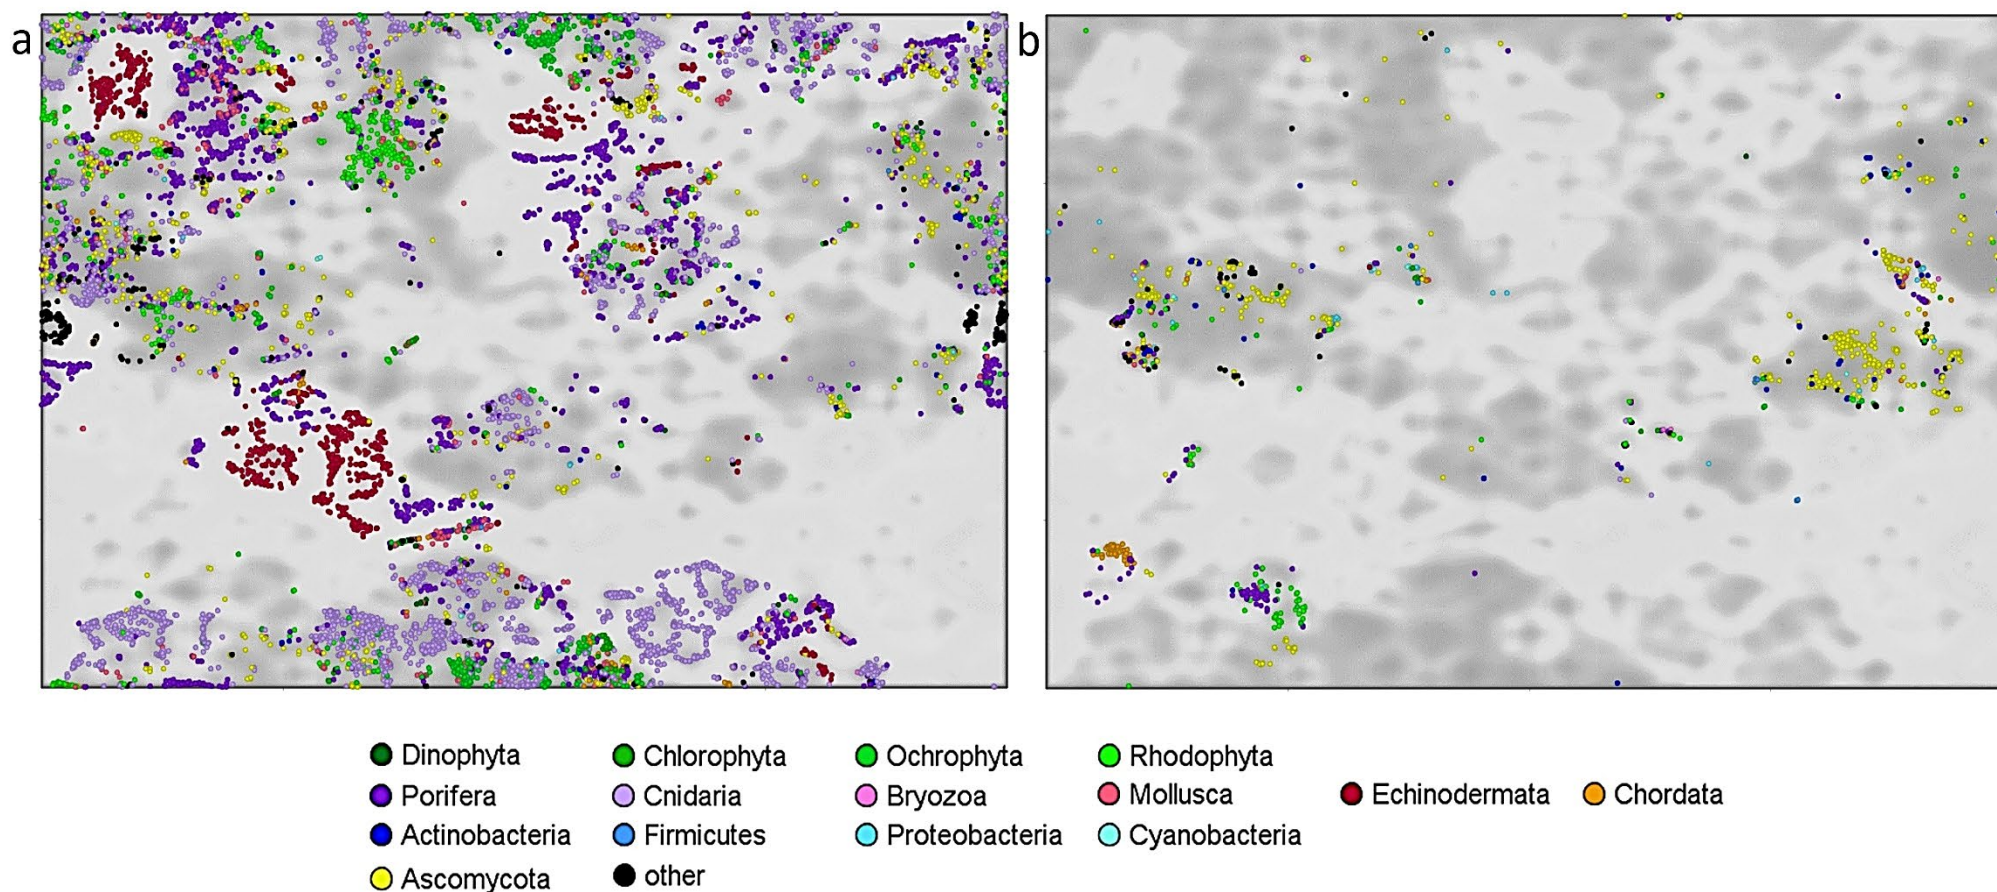

Figure S1: Chemical diversity comparison of MNPs isolated from major marine phyla categorised by structure class (a) terpenes, (b) shikimates using a 200 x 200 SOM

### 13 Conclusions

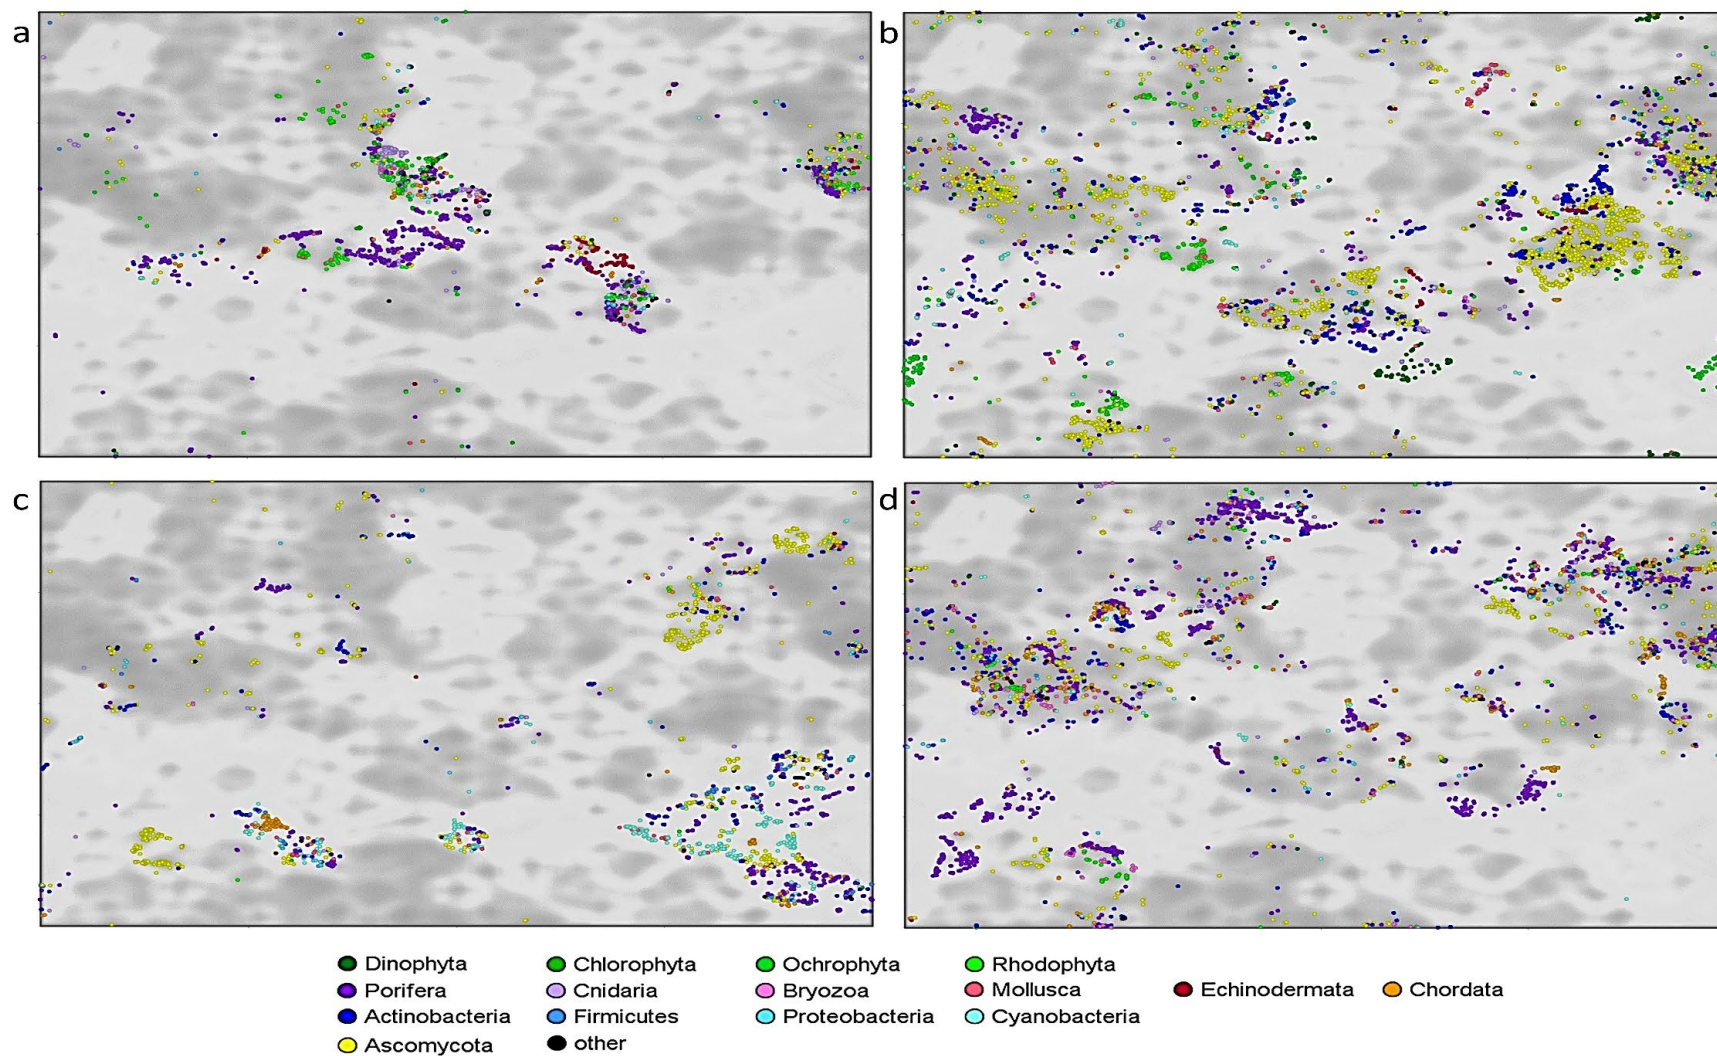

Figure S2: Chemical diversity comparison of MNPs isolated from major marine phyla categorised by structure class (a) fatty acids, (b) polyketides, (c) peptides, (d) alkaloids using a 200 x 200 SOM

Key: Main article bibliography reference // Taxonomy // Location // Article title  
Compound number // Status // Compound name // Biological activity and Other information

13 Conclusions

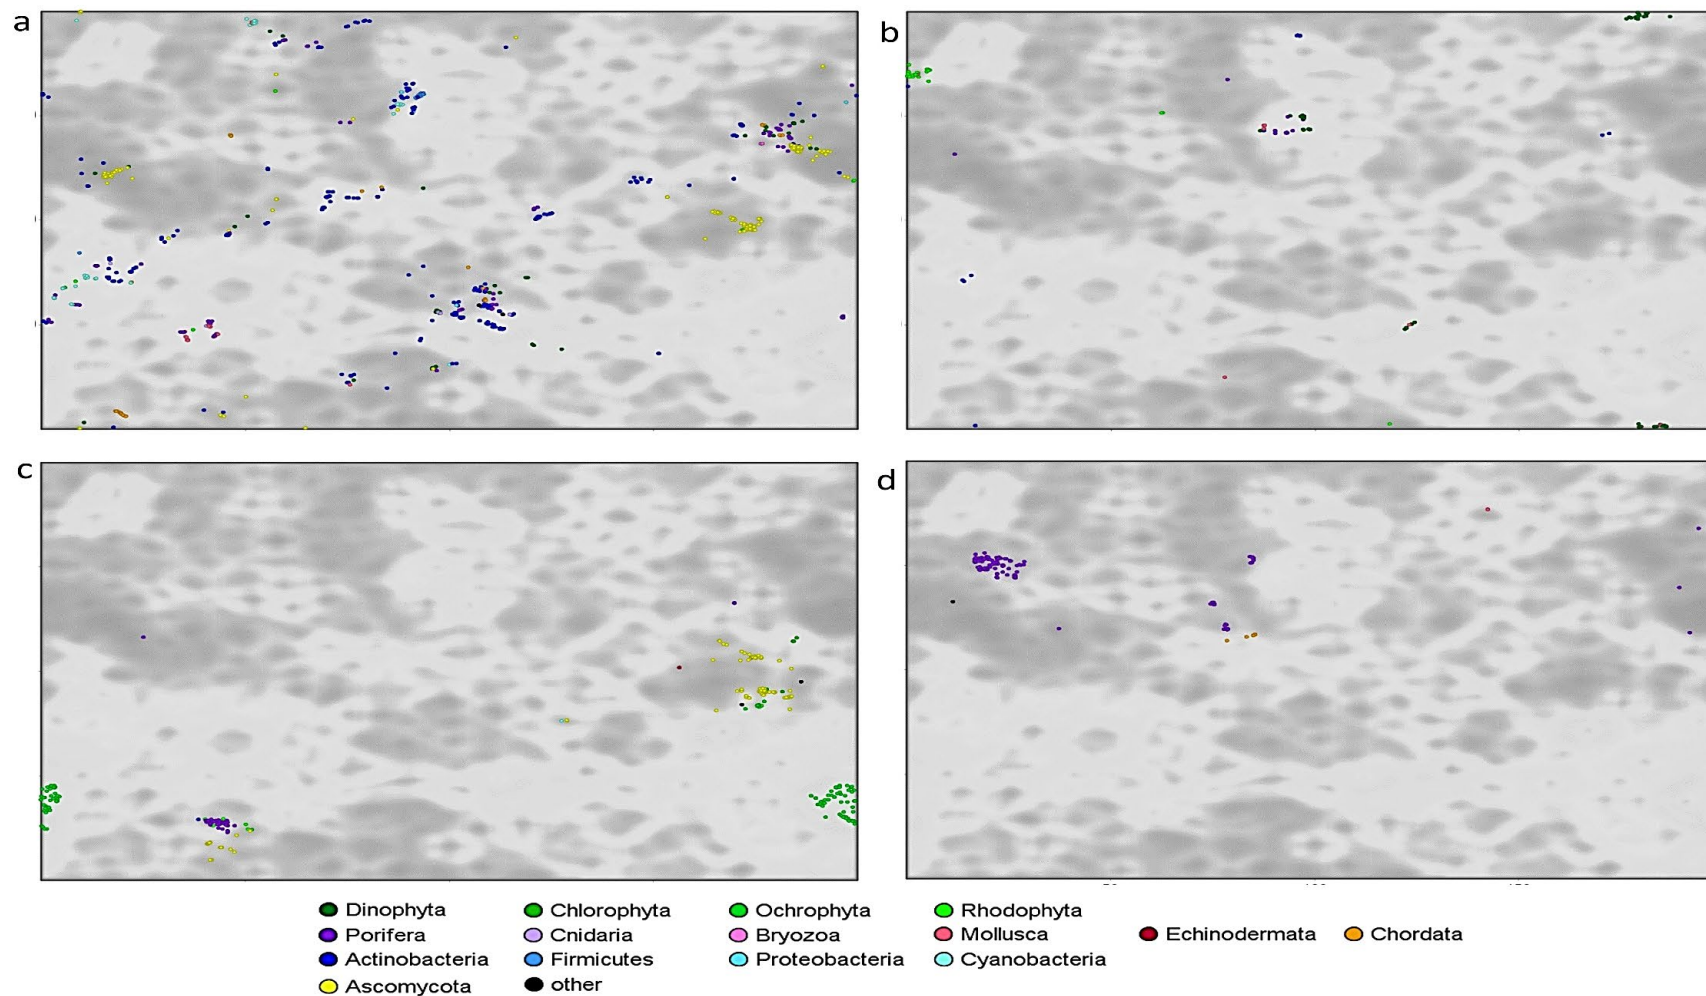

Figure S3: Chemical diversity comparison of MNPs of polyketide classes (a) macrolides, (b) polyethers, (c) diphenyl ethers, (d) endoperoxides coloured coded by phylum using a 200 x 200 SOM

Key: Main article bibliography reference // Taxonomy // Location // Article title

Compound number // Status // Compound name // Biological activity and Other information

## 13 Conclusions

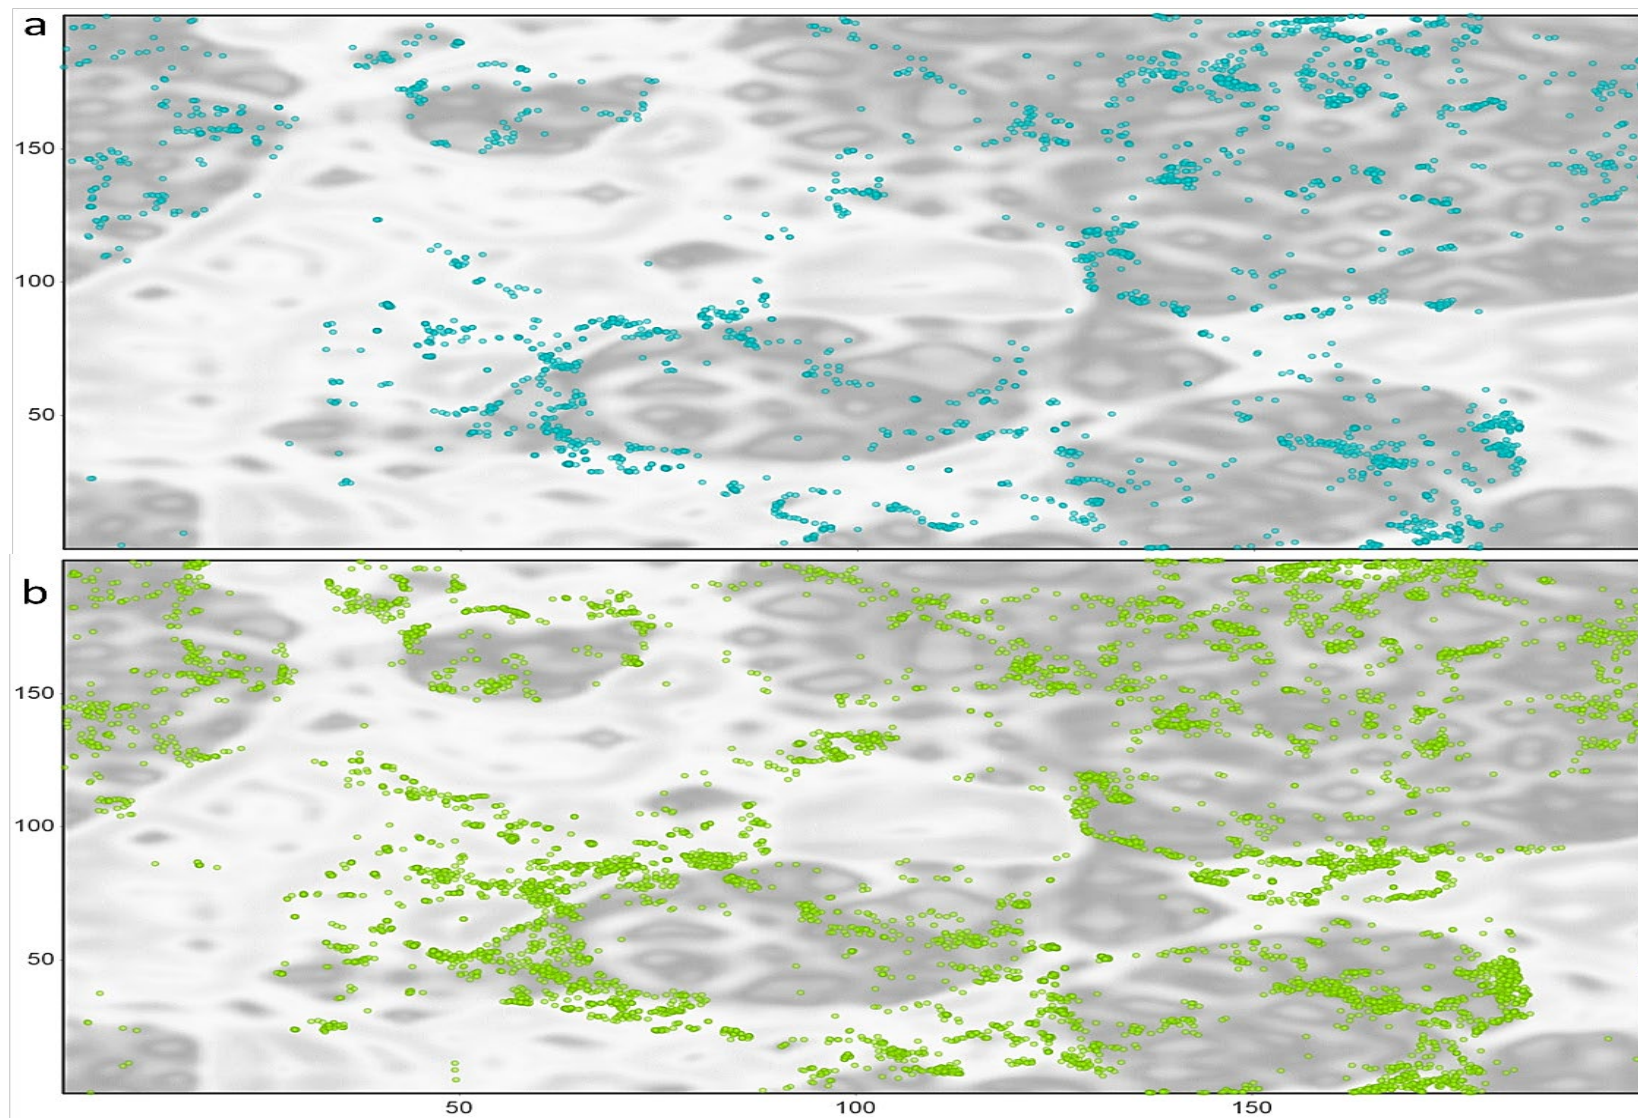

Figure S4: Chemical diversity comparison of MNPs of (a) marine and (b) terrestrial bacterial NPs using a 200 x 200 SOM

Key: Main article bibliography reference // Taxonomy // Location // Article title  
Compound number // Status // Compound name // Biological activity and Other information

## 13 Conclusions

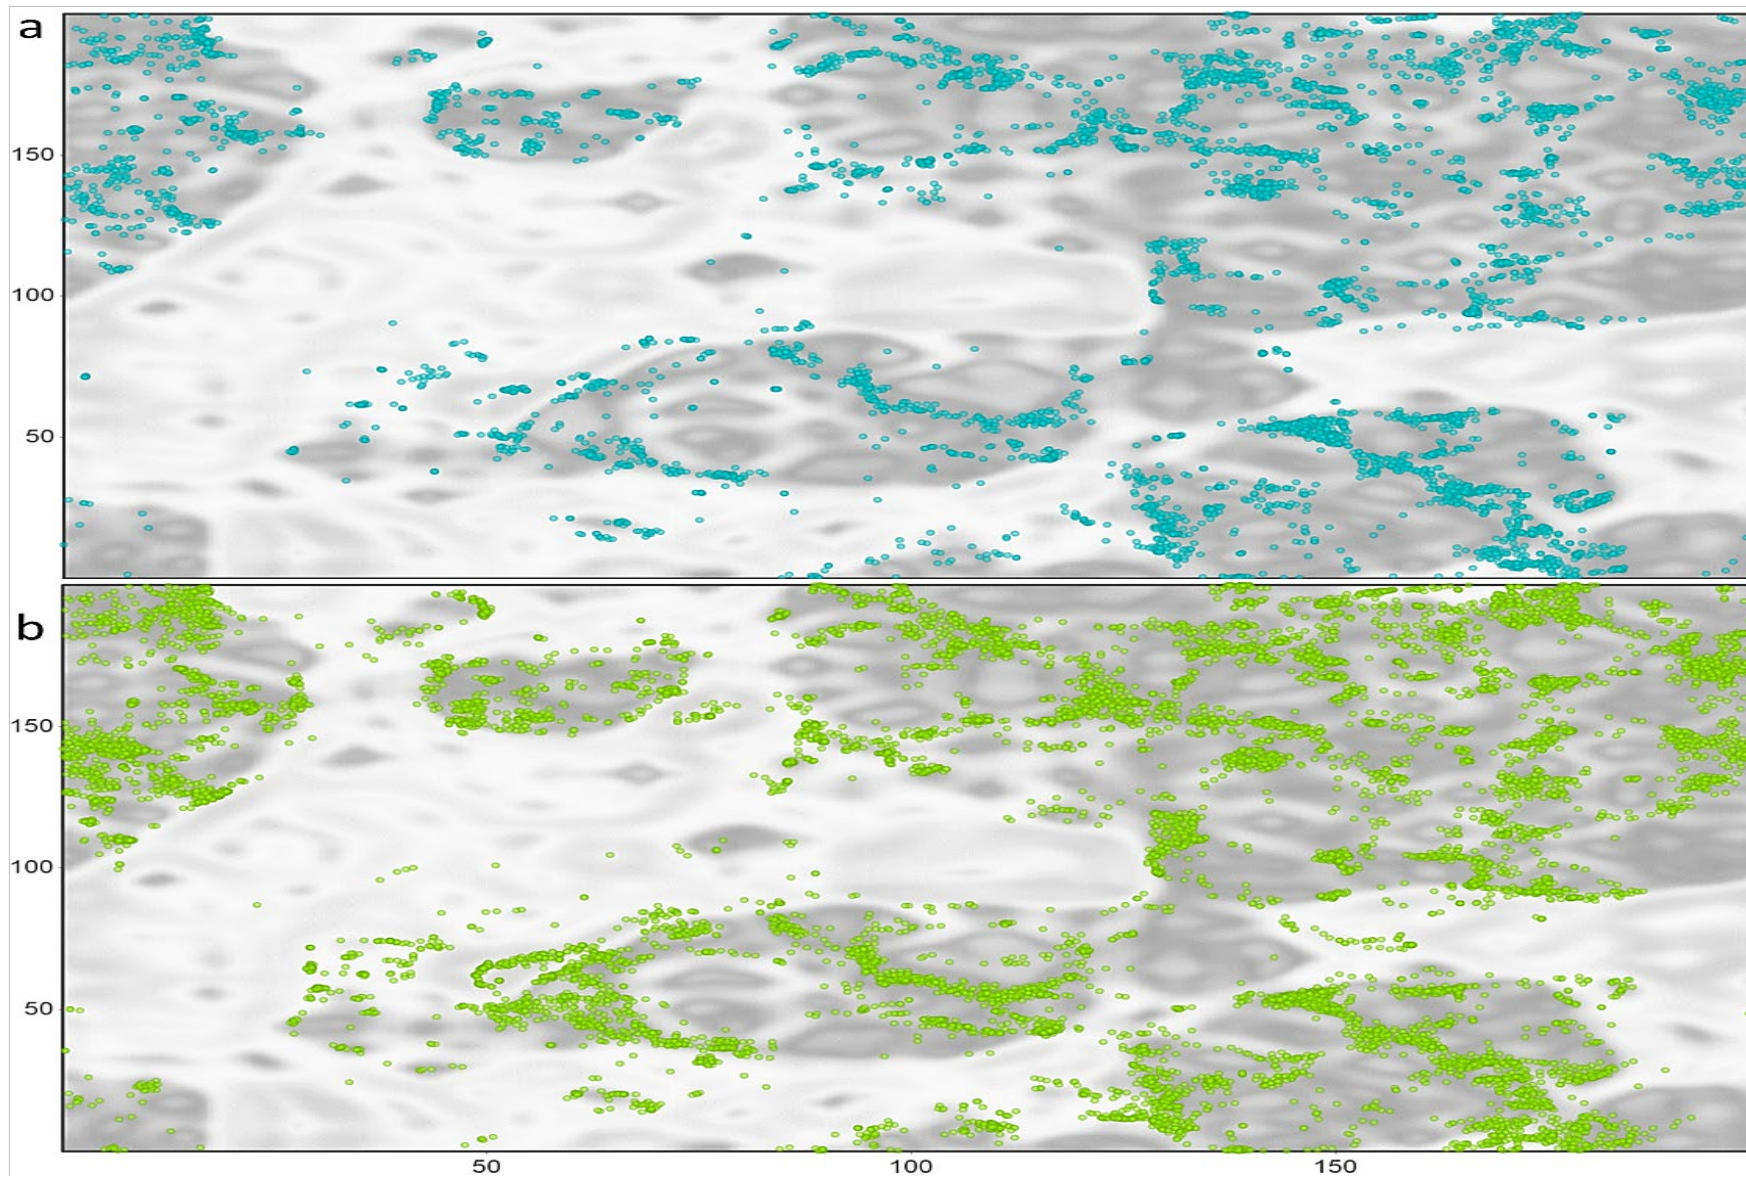

Figure S5: Chemical diversity comparison of MNPs of (a) marine and (b) terrestrial fungal NPs using a 200 x 200 SOM

Key: Main article bibliography reference // Taxonomy // Location // Article title  
Compound number // Status // Compound name // Biological activity and Other information

### 13 Conclusions

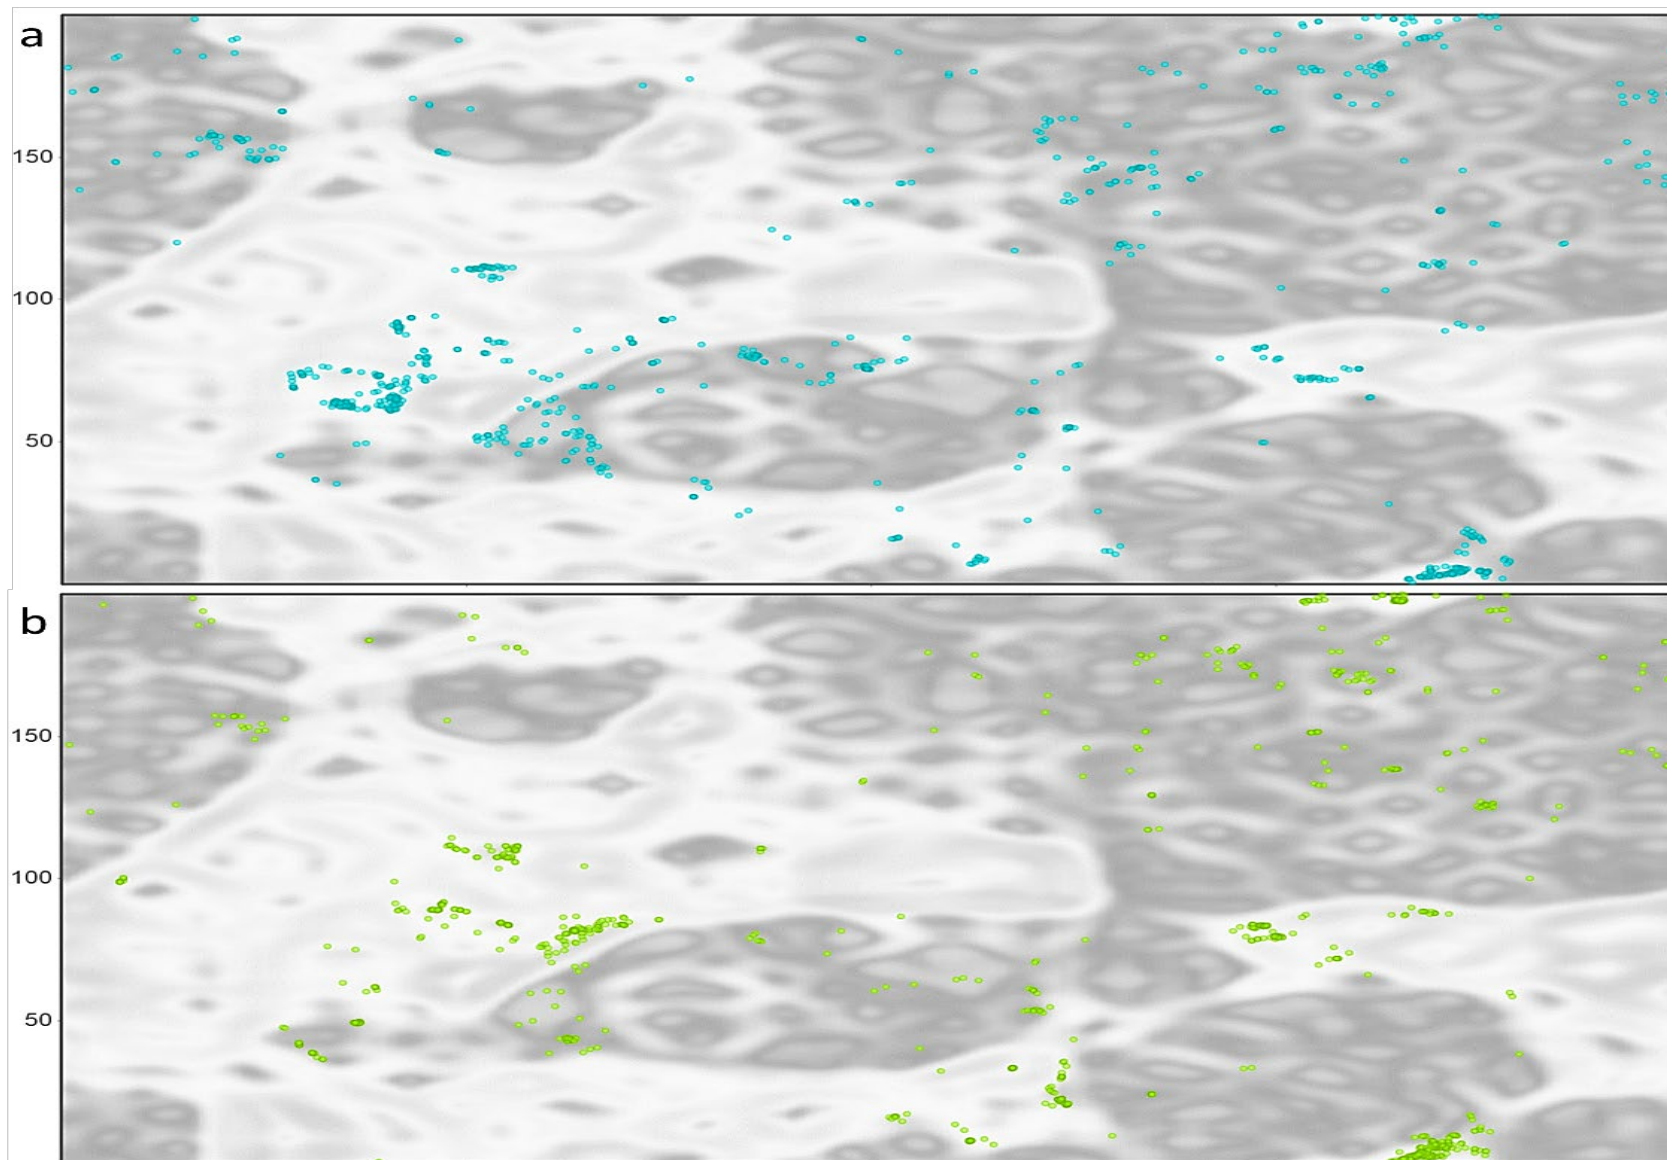

Figure S6: Chemical diversity comparison of MNPs of (a) marine and (b) terrestrial cyanobacteria NPs using a 200 x 200 SOM

Key: Main article bibliography reference // Taxonomy // Location // Article title  
Compound number // Status // Compound name // Biological activity and Other information

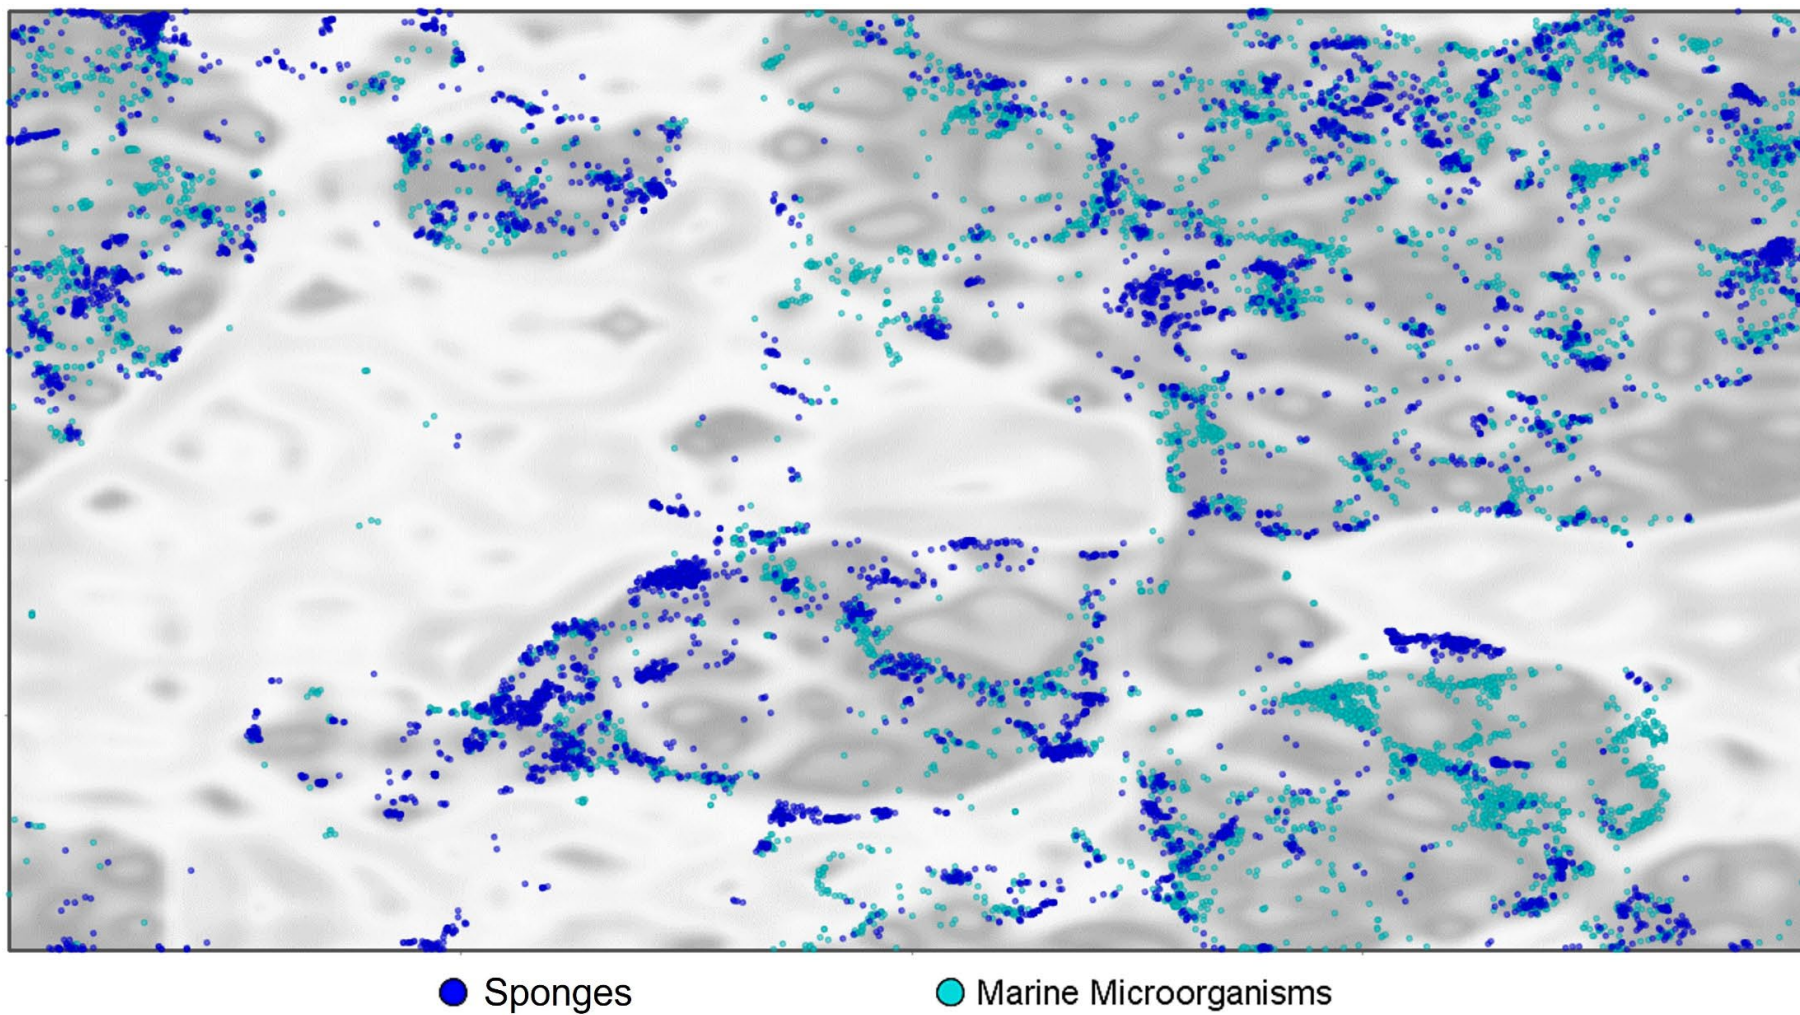

Figure S7: Chemical diversity comparison of terpene, polyketide and alkaloid MNPs from sponge and marine microbes using a 200 x 200 SOM

Key: Main article bibliography reference // Taxonomy // Location // Article title  
Compound number // Status // Compound name // Biological activity and Other information
